# Supplementary material for: Environmental heterogeneity can tip the population genetics of range expansions
Source: eLife journal article supplement (doi:10.7554/elife.44359), 2019-04-12
Supplement: supp [file elife-44359-supp-v1.zip]

Archive with 27 entries (27 files):
- elife_poa_e44359_Figure_4_figure_supplement_1.pdf
- elife_poa_e44359_Figure_2_figure_supplement_1_source_data.csv
- elife_poa_e44359_Figure_2_figure_supplement_1.pdf
- elife_poa_e44359_Figure_1_figure_supplement_1_source_data.csv
- elife_poa_e44359_Figure_1_figure_supplement_3.pdf
- elife_poa_e44359_Figure_2_figure_supplement_2.pdf
- elife_poa_e44359_Figure_6_source_data.zip
- elife_poa_e44359_Figure_3_source_data.zip
- elife_poa_e44359_Figure_2_figure_supplement_3_source_data.csv
- elife_poa_e44359_Figure_2_figure_supplement_5_source_data.csv
- elife_poa_e44359_Figure_1_figure_supplement_2.pdf
- elife_poa_e44359_Figure_2_source_data.zip
- elife_poa_e44359_Figure_2_figure_supplement_4.pdf
- elife_poa_e44359_Figure_5_figure_supplement_1_source_data.zip
- elife_poa_e44359_Figure_1_figure_supplement_2_source_data.zip
- elife_poa_e44359_Figure_5_source_data.zip
- elife_poa_e44359_Figure_6_Figure_Supplement_1.pdf
- elife_poa_e44359_Transparent_Reporting_File.pdf
- elife_poa_e44359_Figure_4_source_data.csv
- elife_poa_e44359_Figure_2_figure_supplement_2_source_data.zip
- elife_poa_e44359_Figure_2_figure_supplement_5.pdf
- elife_poa_e44359_Figure_1_figure_supplement_1.pdf
- elife_poa_e44359_Figure_4_figure_supplement_1_source_data.zip
- elife_poa_e44359_Figure_5_figure_supplement_1.pdf
- elife_poa_e44359_Figure_2_figure_supplement_3.pdf
- elife_poa_e44359_Figure_1_figure_supplement_3_source_data.csv
- elife_poa_e44359_Figure_6_figure_supplement_1_source_data.zip
