# Supplementary material for: Environmental heterogeneity can tip the population genetics of range expansions
Source: eLife journal article supplement (doi:10.7554/elife.44359), 2019-04-12
Supplement: supp [file elife-44359-supp-v1.zip › elife_poa_e44359_Figure_1_figure_supplement_1_source_data.csv]

	mu	0.001	0.002	0.003	0.004	0.005	0.006	0.007	0.008	0.009	0.01	0.011	0.012	0.013	0.014	0.015	0.016
dox=0ug/ml	L(mu)	92.52418584	103.1460915	106.0229305	105.6314046	102.8598669	99.55517259	95.15806064	90.52789802	86.13024695	81.09520747	76.39062893	71.6405675	67.22387352	62.90085994	59.20307732	54.03289206
dox=1ug/ml	L(mu)	3.701781074	29.60258338	45.19298274	54.62157791	62.30707851	66.02543279	69.33105416	70.60201401	71.91934355	71.07070609	70.49429762	69.02326113	67.31496345	65.72634785	62.81984976	59.91694057
