# Supplementary material for: Environmental heterogeneity can tip the population genetics of range expansions
Source: eLife journal article supplement (doi:10.7554/elife.44359), 2019-04-12
Supplement: supp [file elife-44359-supp-v1.zip › elife_poa_e44359_Figure_1_figure_supplement_3_source_data.csv]

rough			smooth
l	w^2		l	w^2
0.112603318	0.000523807		0.097281179	7.35E-05
0.134180113	0.000658658		0.113144714	9.31E-05
0.160829137	0.001061264		0.135440371	0.000127351
0.192994964	0.001278828		0.162526511	0.000176733
0.231593957	0.001762629		0.195031813	0.000217034
0.277912748	0.002055276		0.234038176	0.000276149
0.333495298	0.002726361		0.280845811	0.000330624
0.400194358	0.003639666		0.337014973	0.000443554
0.480233229	0.004657762		0.404417968	0.000576345
0.576279875	0.005782542		0.485301562	0.000727635
0.69153585	0.00759501		0.582361874	0.000943635
0.82984302	0.009647439		0.698834249	0.00126792
0.995811624	0.011775538		0.838601098	0.001631716
1.194973949	0.014307838		1.006321318	0.002064931
1.433968739	0.017188975		1.207585582	0.002618284
1.720762486	0.02035457		1.449102698	0.003271802
2.064914984	0.023590745		1.738923238	0.004007656
2.47789798	0.027453855		2.086707885	0.004832855
2.973477576	0.031465795		2.504049462	0.005797092
3.568173092	0.03590786		3.004859354	0.006801443
4.28180771	0.04083246		3.605831225	0.007907958
5.138169252	0.046097346		4.32699747	0.009073733
6.165803102	0.051541229		5.192396964	0.010263373
7.398963723	0.05714548		6.230876357	0.011428229
8.878756467	0.062252798		7.477051629	0.012470473
10.65450776	0.06590461		8.972461955	0.013243796
			10.76695435	0.013709449
