# Supplementary material for: Environmental heterogeneity can tip the population genetics of range expansions
Source: eLife journal article supplement (doi:10.7554/elife.44359), 2019-04-12
Supplement: supp [file elife-44359-supp-v1.zip › elife_poa_e44359_Figure_2_figure_supplement_1_source_data.csv]

[dox]	s	err(s)
0	0.230095175	0.030213064
0.05	0.164998577	0.018195408
0.1	0.126445352	0.0132046
0.15	0.059093461	0.045219555
0.2	0.072406575	0.027088062
0.25	0.043905489	0.020548967
0.3	-0.000332903	0.015527173
0.35	-0.00107907	0.018559804
0.4	-0.029072974	0.017515487
0.5	-0.071624498	0.022577826
0.6	-0.080445158	0.036107902
0.7	-0.100808126	0.042702574
0.9	-0.09628121	0.025611408
1.1	-0.131545422	0.026096634
