# Supplementary material for: Environmental heterogeneity can tip the population genetics of range expansions
Source: eLife journal article supplement (doi:10.7554/elife.44359), 2019-04-12
Supplement: supp [file elife-44359-supp-v1.zip › elife_poa_e44359_Figure_2_figure_supplement_3_source_data.csv]

smooth			rough
by area	by OD		by area	by OD
0.641261892	0.65		0.49617529	0.85
0.571989774	0.5		0.571989774	0.7
0.689642419	0.7		0.47550361	0.55
0.506676063	0.45		0.355385757	0.3
0.343116896	0.25		0.752592082	0.75
0.485784472	0.45		0.70201244	0.9
0.617731363	0.6		1.286976992	1.45
0.778541637	0.8		0.483719503	0.45
0.886738088	1		0.606131033	0.65
1.031879669	0.9		0.518353913	0.65
0.440386495	0.45		0.20457266	0.2
1.664510036	1.45
1.442839258	1.3
