# Supplementary material for: Environmental heterogeneity can tip the population genetics of range expansions
Source: eLife journal article supplement (doi:10.7554/elife.44359), 2019-04-12
Supplement: supp [file elife-44359-supp-v1.zip › elife_poa_e44359_Figure_2_figure_supplement_5_source_data.csv]

smooth			rough
s	fMT		s	fMT
0.176797661	0.456514289		0.176797661	0.039528221
0.082184284	0.30955956		0.082184284	0.044227895
-0.012429094	0.083057846		-0.012429094	0.00840072
-0.058722324	0.025523849		-0.058722324	0.014825548
-0.09029899	0.025388836		-0.09029899	0.013081956
