# Supplementary material for: Environmental heterogeneity can tip the population genetics of range expansions
Source: eLife journal article supplement (doi:10.7554/elife.44359), 2019-04-12
Supplement: supp [file elife-44359-supp-v1.zip › elife_poa_e44359_Figure_4_source_data.csv]

	rho
k		0.25	0.1	0.05	0.01	0.005	0.001	0.0001	0.00001	0
	0	1.179228712	1.197428263	1.195925962	1.193625676	1.190117477	1.19188407	1.185473274	1.195607161	1.197658409
	0.1	1.081246434	1.037048777	1.034814253	1.041427256	1.023543045	1.017501264	1.023721002	1.033137414	1.0325542
	0.2	0.976148708	0.902473181	0.874826017	0.846784841	0.822265967	0.792135665	0.777721036	0.776721378	0.780111958
	0.3	0.851484146	0.756747775	0.707991482	0.661049183	0.634376121	0.562315417	0.532829159	0.508043755	0.518489527
	0.35	0.801518495	0.670313182	0.62425052	0.542165938	0.506435049	0.439860666	0.398522983	0.397241482	0.407357135
	0.375	0.780072727	0.64398308	0.585332459	0.461111486	0.433693544	0.356978483	0.363704041	0.332991438	0.350462354
	0.4	0.738454619	0.613210272	0.529922085	0.407811509	0.399759919	0.304852948	0.254414594	0.248190085	0.239823591
	0.41	0.730456319	0.591442403	0.511957129	0.358750945	0.346348985	0.231297756	0.209668219	0.140104035	0.000221521
	0.425	0.726227202	0.561738752	0.486362073	0.337087206	0.307473921	0.165202481	0.085818654	0.034298179	0.000269337
	0.45	0.693977934	0.53431743	0.456041069	0.289657155	0.217761912	0.097790737	0.020481782	0.002229085	0
	0.5	0.654393926	0.467123797	0.372042259	0.187955314	0.125691748	0.039450117	0.004105898	0.000394005	0
	0.6	0.562782061	0.354442597	0.241436473	0.077137474	0.047006093	0.009804317	0.001158658	9.96382E-05	0
	0.7	0.488162882	0.26736583	0.16353865	0.040301689	0.022059977	0.004544217	0.000432338	4.53006E-05	0
	0.8	0.418486184	0.205890222	0.111162895	0.024634956	0.012455434	0.002557863	0.000256724	2.59432E-05	0
	0.9	0.349649267	0.15278992	0.080973121	0.016656704	0.008546737	0.001676727	0.000169899	1.65664E-05	0
	1	0.302969564	0.121909792	0.060965416	0.012225779	0.006098295	0.001205835	0.000120712	1.21699E-05	0
