# Supplementary material for: Environmental heterogeneity can tip the population genetics of range expansions
Source: eLife journal article supplement (doi:10.7554/elife.44359), 2019-04-12
Supplement: supp [file rescaled_fMT_data.xlsx]

## Sheet: k=0
rho
0	ks*s	-1.5084	-0.7542	0	0.7542	1.5084
	fMT/f0	0.068366	0.198377	0.867136	2.49512	4.41102
0.1	ks*s	-1.47886	-0.73943	0	0.73943	1.47886
	fMT/f0	0.0779251	0.239063	0.863581	2.45319	4.28162
0.2	ks*s	-1.3963	-0.698148	0	0.698148	1.3963
	fMT/f0	0.0863181	0.254567	0.922404	2.34702	3.93155
0.3	ks*s	-1.36254	-0.681271	0	0.681271	1.36254
	fMT/f0	0.109086	0.299689	0.961564	2.24984	3.81394
0.35	ks*s	-1.31879	-0.659394	0	0.659394	1.31879
	fMT/f0	0.115679	0.314545	0.986918	2.19371	3.64676
0.375	ks*s	-1.29412	-0.647061	0	0.647061	1.29412
	fMT/f0	0.1232	0.352132	0.949619	2.19034	3.55073
0.39	ks*s	-1.28933	-0.644666	0	0.644666	1.28933
	fMT/f0	0.131278	0.331079	0.972434	2.17778	3.53392
0.4	ks*s	-1.30929	-0.654646	0	0.654646	1.30929
	fMT/f0	0.138489	0.355346	0.958922	2.17404	3.6176
0.401	ks*s	-1.27823	-0.639116	0	0.639116	1.27823
	fMT/f0	0.153924	0.368141	1.00132	2.10006	3.51473
0.4025	ks*s	-1.20175	-0.600873	0	0.600873	1.20175
	fMT/f0	0.139248	0.411166	0.983521	2.07196	3.23196
0.405	ks*s	-1.22159	-0.610796	0	0.610796	1.22159
	fMT/f0	0.15487	0.397313	0.990027	2.07103	3.30658
0.4075	ks*s	-1.34939	-0.674697	0	0.674697	1.34939
	fMT/f0	0.116651	0.336359	0.960786	2.21341	3.7704

## Sheet: k=0.000001
rho
0	ks*s	-1.47015	-0.735073	0	0.735073	1.47015
	fMT/f0	0.0627172	0.209583	0.864965	2.47497	4.23282
0.1	ks*s	-1.47163	-0.735814	0	0.735814	1.47163
	fMT/f0	0.0817595	0.248527	0.86541	2.43996	4.25135
0.2	ks*s	-1.3744	-0.687201	0	0.687201	1.3744
	fMT/f0	0.109647	0.335174	0.952518	2.23623	3.87047
0.3	ks*s	-1.09584	-0.547919	0	0.547919	1.09584
	fMT/f0	0.193222	0.406933	1.04434	1.9591	2.89306
0.35	ks*s	-0.888769	-0.444385	0	0.444385	0.888769
	fMT/f0	0.331768	0.605813	1.04659	1.62718	2.39236
0.375	ks*s	-0.685129	-0.342564	0	0.342564	0.685129
	fMT/f0	0.453746	0.720061	0.988763	1.48118	1.94728
0.4	ks*s	-0.384781	-0.19239	0	0.19239	0.384781
	fMT/f0	0.579667	0.826466	1.08425	1.2968	1.38803
0.425	ks*s	-0.193093	-0.0965463	0	0.0965463	0.193093
	fMT/f0	0.795332	0.883911	1.04562	1.16507	1.15531
0.45	ks*s	-0.304555	-0.152278	0	0.152278	0.304555
	fMT/f0	0.707679	0.814863	1.07202	1.2133	1.30497
0.5	ks*s	-0.539187	-0.269594	0	0.269594	0.539187
	fMT/f0	0.560529	0.789281	1.03649	1.24936	1.73553
0.6	ks*s	-0.801479	-0.400739	0	0.400739	0.801479
	fMT/f0	0.381625	0.67587	1.02352	1.53387	2.20254
0.8	ks*s	-1.2157	-0.60785	0	0.60785	1.2157
	fMT/f0	0.205439	0.462104	1.01482	1.95246	3.32642

## Sheet: k=0.00001
rho
0	ks*s	-1.52968	-0.764842	0	0.764842	1.52968
	fMT/f0	0.0671154	0.17826	0.886379	2.50129	4.51317
0.1	ks*s	-1.43751	-0.718756	0	0.718756	1.43751
	fMT/f0	0.0804801	0.243951	0.882831	2.41224	4.09945
0.2	ks*s	-1.32402	-0.662012	0	0.662012	1.32402
	fMT/f0	0.108706	0.315171	0.929367	2.25809	3.65123
0.3	ks*s	-1.17641	-0.588205	0	0.588205	1.17641
	fMT/f0	0.207683	0.423512	1.0596	1.92549	3.18722
0.35	ks*s	-0.876589	-0.438294	0	0.438294	0.876589
	fMT/f0	0.307712	0.607082	1.0181	1.69074	2.33341
0.375	ks*s	-0.677729	-0.338865	0	0.338865	0.677729
	fMT/f0	0.439875	0.685311	1.06743	1.44705	1.93139
0.4	ks*s	-0.398298	-0.199149	0	0.199149	0.398298
	fMT/f0	0.60176	0.812428	1.08303	1.25179	1.44306
0.425	ks*s	-0.262294	-0.131147	0	0.131147	0.262294
	fMT/f0	0.765959	0.848259	1.07178	1.08974	1.31032
0.45	ks*s	-0.325262	-0.162631	0	0.162631	0.325262
	fMT/f0	0.720175	0.841958	0.977833	1.23682	1.35524
0.5	ks*s	-0.485925	-0.242962	0	0.242962	0.485925
	fMT/f0	0.588298	0.785798	1.01823	1.29544	1.60788
0.6	ks*s	-0.73165	-0.365825	0	0.365825	0.73165
	fMT/f0	0.435837	0.694455	0.955362	1.56287	2.02614
0.8	ks*s	-1.2103	-0.605149	0	0.605149	1.2103
	fMT/f0	0.197428	0.479084	0.983483	1.97495	3.30094

## Sheet: k=0.0001
rho
0	ks*s	-1.53501	-0.767505	0	0.767505	1.53501
	fMT/f0	0.0641278	0.214931	0.835836	2.52842	4.53508
0.1	ks*s	-1.43552	-0.717762	0	0.717762	1.43552
	fMT/f0	0.0829166	0.232801	0.923512	2.37858	4.09807
0.2	ks*s	-1.36144	-0.680722	0	0.680722	1.36144
	fMT/f0	0.119899	0.280879	1.02581	2.19324	3.82308
0.3	ks*s	-1.13582	-0.567911	0	0.567911	1.13582
	fMT/f0	0.193804	0.46641	1.04318	1.90498	3.05169
0.35	ks*s	-0.946091	-0.473045	0	0.473045	0.946091
	fMT/f0	0.325623	0.586809	1.01994	1.6829	2.53748
0.375	ks*s	-0.703419	-0.351709	0	0.351709	0.703419
	fMT/f0	0.482182	0.717855	0.992357	1.42861	2.01754
0.4	ks*s	-0.418246	-0.209123	0	0.209123	0.418246
	fMT/f0	0.592201	0.791467	1.14405	1.17898	1.50716
0.425	ks*s	-0.261249	-0.130624	0	0.130624	0.261249
	fMT/f0	0.729739	0.820271	1.10891	1.18979	1.23322
0.45	ks*s	-0.342143	-0.171071	0	0.171071	0.342143
	fMT/f0	0.743636	0.851138	0.964759	1.14818	1.44349
0.5	ks*s	-0.538806	-0.269403	0	0.269403	0.538806
	fMT/f0	0.579813	0.796602	0.993198	1.26869	1.73549
0.6	ks*s	-0.713679	-0.356839	0	0.356839	0.713679
	fMT/f0	0.420319	0.622892	0.974876	1.67245	1.92635
0.8	ks*s	-1.18891	-0.594455	0	0.594455	1.18891
	fMT/f0	0.189518	0.49933	1.01187	1.92427	3.23745

## Sheet: k=0.001
rho
0	ks*s	-1.47299	-0.736497	0	0.736497	1.47299
	fMT/f0	0.0646179	0.197197	0.832421	2.515	4.23609
0.1	ks*s	-1.48345	-0.741724	0	0.741724	1.48345
	fMT/f0	0.0802957	0.236944	0.907568	2.41384	4.3128
0.2	ks*s	-1.38247	-0.691237	0	0.691237	1.38247
	fMT/f0	0.114698	0.320552	0.957967	2.24264	3.9031
0.3	ks*s	-1.15933	-0.579665	0	0.579665	1.15933
	fMT/f0	0.177074	0.432817	1.04981	1.94543	3.11837
0.35	ks*s	-0.948946	-0.474473	0	0.474473	0.948946
	fMT/f0	0.28271	0.585301	1.06616	1.66834	2.54386
0.375	ks*s	-0.756471	-0.378236	0	0.378236	0.756471
	fMT/f0	0.355899	0.643595	1.08685	1.54497	2.06989
0.4	ks*s	-0.572223	-0.286112	0	0.286112	0.572223
	fMT/f0	0.475896	0.740502	1.08456	1.37211	1.72645
0.425	ks*s	-0.496702	-0.248351	0	0.248351	0.496702
	fMT/f0	0.550357	0.826227	0.957457	1.37452	1.59658
0.45	ks*s	-0.448151	-0.224075	0	0.224075	0.448151
	fMT/f0	0.609675	0.794508	1.0257	1.27869	1.54132
0.5	ks*s	-0.562461	-0.281231	0	0.281231	0.562461
	fMT/f0	0.519331	0.776748	0.99229	1.38581	1.72026
0.6	ks*s	-0.765187	-0.382593	0	0.382593	0.765187
	fMT/f0	0.405476	0.649332	1.04148	1.53109	2.10909
0.8	ks*s	-1.15778	-0.578891	0	0.578891	1.15778
	fMT/f0	0.183018	0.442906	1.03294	1.95039	3.11295

## Sheet: k=0.01
rho
0	ks*s	-1.524	-0.761998	0	0.761998	1.524
	fMT/f0	0.065639	0.19057	0.85811	2.51738	4.4818
0.1	ks*s	-1.46438	-0.732191	0	0.732191	1.46438
	fMT/f0	0.0789955	0.24705	0.907542	2.39843	4.22708
0.2	ks*s	-1.34708	-0.673541	0	0.673541	1.34708
	fMT/f0	0.112292	0.300838	0.950768	2.25277	3.748
0.3	ks*s	-1.17597	-0.587987	0	0.587987	1.17597
	fMT/f0	0.163638	0.422313	0.990855	2.03305	3.15148
0.35	ks*s	-1.0814	-0.540698	0	0.540698	1.0814
	fMT/f0	0.243603	0.532232	1.05653	1.7778	2.91521
0.375	ks*s	-0.954276	-0.477138	0	0.477138	0.954276
	fMT/f0	0.299015	0.54019	1.03403	1.74435	2.53319
0.4	ks*s	-0.940346	-0.470173	0	0.470173	0.940346
	fMT/f0	0.329898	0.567577	1.014	1.70907	2.51064
0.425	ks*s	-0.810633	-0.405317	0	0.405317	0.810633
	fMT/f0	0.326752	0.641493	1.02818	1.63561	2.17701
0.45	ks*s	-0.750732	-0.375366	0	0.375366	0.750732
	fMT/f0	0.378669	0.668179	1.05314	1.53031	2.069
0.5	ks*s	-0.713535	-0.356767	0	0.356767	0.713535
	fMT/f0	0.387979	0.687987	1.04501	1.52306	1.98166
0.6	ks*s	-0.848803	-0.424401	0	0.424401	0.848803
	fMT/f0	0.340514	0.575047	1.07575	1.62901	2.27695
0.8	ks*s	-1.19945	-0.599724	0	0.599724	1.19945
	fMT/f0	0.16792	0.46121	0.980791	2.01035	3.2471

## Sheet: k=0.1
rho
0	ks*s	-1.5084	-0.7542	0	0.7542	1.5084
	fMT/f0	0.068366	0.198377	0.867136	2.49512	4.41102
0.1	ks*s	-1.47886	-0.73943	0	0.73943	1.47886
	fMT/f0	0.0779252	0.239063	0.863581	2.45319	4.28162
0.2	ks*s	-1.3963	-0.698148	0	0.698148	1.3963
	fMT/f0	0.0863181	0.254567	0.922404	2.34702	3.93155
0.3	ks*s	-1.36254	-0.681271	0	0.681271	1.36254
	fMT/f0	0.109086	0.299689	0.961564	2.24984	3.81394
0.35	ks*s	-1.31879	-0.659394	0	0.659394	1.31879
	fMT/f0	0.115679	0.314545	0.986918	2.19371	3.64676
0.375	ks*s	-1.29412	-0.647061	0	0.647061	1.29412
	fMT/f0	0.1232	0.352132	0.949619	2.19034	3.55073
0.4	ks*s	-1.28933	-0.644666	0	0.644666	1.28933
	fMT/f0	0.131278	0.331079	0.972434	2.17778	3.53392
0.425	ks*s	-1.30929	-0.654646	0	0.654646	1.30929
	fMT/f0	0.138489	0.355346	0.958922	2.17404	3.6176
0.45	ks*s	-1.27823	-0.639116	0	0.639116	1.27823
	fMT/f0	0.153924	0.368141	1.00132	2.10006	3.51473
0.5	ks*s	-1.20175	-0.600873	0	0.600873	1.20175
	fMT/f0	0.139248	0.411166	0.983521	2.07196	3.23196
0.6	ks*s	-1.22159	-0.610796	0	0.610796	1.22159
	fMT/f0	0.15487	0.397313	0.990027	2.07103	3.30658
0.8	ks*s	-1.34939	-0.674697	0	0.674697	1.34939
	fMT/f0	0.116651	0.336359	0.960786	2.21341	3.7704
