# Supplementary material for: Environmental heterogeneity can tip the population genetics of range expansions
Source: eLife journal article supplement (doi:10.7554/elife.44359), 2019-04-12
Supplement: supp [file sfs rho=0.4.xlsx]

## Sheet: s=-0.15
0	0.994568
9.99999e-07	0.846242
2e-06	0.646422
3e-06	0.553841
4e-06	0.494169
5e-06	0.452341
5.99999e-06	0.420539
6.99999e-06	0.395119
7.99999e-06	0.374409
8.99999e-06	0.356857
9.99999e-06	0.341769
1.1e-05	0.329015
1.2e-05	0.317587
1.3e-05	0.307098
1.4e-05	0.297452
1.5e-05	0.288625
1.6e-05	0.280811
1.7e-05	0.273781
1.8e-05	0.267073
1.9e-05	0.260964
2e-05	0.255171
2.1e-05	0.249725
2.2e-05	0.245024
2.3e-05	0.240469
2.4e-05	0.236045
2.5e-05	0.232075
2.6e-05	0.228314
2.7e-05	0.224763
2.8e-05	0.221611
2.9e-05	0.218366
3e-05	0.214902
3.1e-05	0.211809
3.2e-05	0.208993
3.3e-05	0.206124
3.4e-05	0.203415
3.5e-05	0.200974
3.6e-05	0.19847
3.7e-05	0.196064
3.8e-05	0.193984
3.9e-05	0.191972
4e-05	0.190042
4.1e-05	0.188142
4.2e-05	0.186174
4.3e-05	0.184279
4.4e-05	0.182438
4.5e-05	0.180533
4.6e-05	0.178881
4.7e-05	0.177167
4.8e-05	0.175359
4.9e-05	0.173834
5e-05	0.1723
5.09999e-05	0.170663
5.19999e-05	0.169182
5.29999e-05	0.167794
5.39999e-05	0.166322
5.49999e-05	0.165075
5.59999e-05	0.164047
5.69999e-05	0.162961
5.79999e-05	0.161811
5.89999e-05	0.160613
5.99999e-05	0.159444
6.09999e-05	0.158265
6.19999e-05	0.157173
6.29999e-05	0.156194
6.39999e-05	0.155093
6.49999e-05	0.154017
6.59999e-05	0.152994
6.69999e-05	0.151975
6.79999e-05	0.150991
6.89999e-05	0.150066
6.99999e-05	0.149145
7.09999e-05	0.148263
7.19999e-05	0.147459
7.29999e-05	0.146558
7.39999e-05	0.145603
7.49999e-05	0.144736
7.59999e-05	0.143908
7.69999e-05	0.14307
7.79999e-05	0.142276
7.89999e-05	0.141506
7.99999e-05	0.140727
8.09999e-05	0.139894
8.19999e-05	0.139002
8.29999e-05	0.138198
8.39999e-05	0.137443
8.49999e-05	0.136664
8.59999e-05	0.135923
8.69999e-05	0.135237
8.79999e-05	0.134579
8.89999e-05	0.133863
8.99999e-05	0.133161
9.09999e-05	0.132567
9.19999e-05	0.131938
9.29999e-05	0.131281
9.39999e-05	0.130696
9.49999e-05	0.130097
9.59999e-05	0.129464
9.69999e-05	0.128908
9.79999e-05	0.128392
9.89999e-05	0.127885
9.99999e-05	0.12732
0.000101	0.126701
0.000102	0.126136
0.000103	0.1256
0.000104	0.125089
0.000105	0.124616
0.000106	0.124095
0.000107	0.123535
0.000108	0.123057
0.000109	0.122638
0.00011	0.122176
0.000111	0.121669
0.000112	0.121274
0.000113	0.12089
0.000114	0.120412
0.000115	0.119867
0.000116	0.119311
0.000117	0.118746
0.000118	0.118239
0.000119	0.117884
0.00012	0.117518
0.000121	0.117168
0.000122	0.116812
0.000123	0.116403
0.000124	0.115998
0.000125	0.115599
0.000126	0.11519
0.000127	0.114785
0.000128	0.11441
0.000129	0.114006
0.00013	0.113558
0.000131	0.11311
0.000132	0.112681
0.000133	0.112281
0.000134	0.111911
0.000135	0.11157
0.000136	0.111229
0.000137	0.110869
0.000138	0.110493
0.000139	0.110114
0.00014	0.109758
0.000141	0.109407
0.000142	0.108969
0.000143	0.10855
0.000144	0.108194
0.000145	0.107795
0.000146	0.107405
0.000147	0.10704
0.000148	0.106723
0.000149	0.106435
0.00015	0.106099
0.000151	0.105753
0.000152	0.105432
0.000153	0.105091
0.000154	0.104808
0.000155	0.104594
0.000156	0.104307
0.000157	0.103951
0.000158	0.103659
0.000159	0.10342
0.00016	0.103206
0.000161	0.102991
0.000162	0.102723
0.000163	0.102446
0.000164	0.102178
0.000165	0.101915
0.000166	0.101642
0.000167	0.101354
0.000168	0.101057
0.000169	0.100726
0.00017	0.100356
0.000171	0.100054
0.000172	0.0998197
0.000173	0.0995616
0.000174	0.0992887
0.000175	0.0989672
0.000176	0.0986847
0.000177	0.0984459
0.000178	0.0981683
0.000179	0.0979052
0.00018	0.0976567
0.000181	0.0974278
0.000182	0.0972427
0.000183	0.0970624
0.000184	0.0968432
0.000185	0.096546
0.000186	0.0962391
0.000187	0.0960053
0.000188	0.0957471
0.000189	0.0955084
0.00019	0.0953086
0.000191	0.0950504
0.000192	0.0948117
0.000193	0.0946315
0.000194	0.0944512
0.000195	0.0942028
0.000196	0.0939787
0.000197	0.0938033
0.000198	0.0935889
0.000199	0.0933307
0.0002	0.0930677
0.000201	0.0928143
0.000202	0.0925756
0.000203	0.0924051
0.000204	0.0922151
0.000205	0.0919715
0.000206	0.0917426
0.000207	0.091538
0.000208	0.0912798
0.000209	0.0910216
0.00021	0.0908267
0.000211	0.0906367
0.000212	0.0904272
0.000213	0.090208
0.000214	0.0900034
0.000215	0.0897939
0.000216	0.0896137
0.000217	0.0894432
0.000218	0.0892678
0.000219	0.0891265
0.00022	0.0889852
0.000221	0.0888001
0.000222	0.0886199
0.000223	0.0884786
0.000224	0.0883276
0.000225	0.0881619
0.000226	0.0879817
0.000227	0.0878209
0.000228	0.0876407
0.000229	0.0874068
0.00023	0.0871925
0.000231	0.087022
0.000232	0.0868758
0.000233	0.0867248
0.000234	0.0865494
0.000235	0.0863789
0.000236	0.0862084
0.000237	0.0860087
0.000238	0.0857748
0.000239	0.0855751
0.00024	0.0854241
0.000241	0.0852341
0.000242	0.0850441
0.000243	0.0848785
0.000244	0.0847128
0.000245	0.0845131
0.000246	0.0843182
0.000247	0.0841916
0.000248	0.0840405
0.000249	0.0838846
0.00025	0.0837336
0.000251	0.0835875
0.000252	0.0834754
0.000253	0.0833682
0.000254	0.0832513
0.000255	0.0830857
0.000256	0.0828957
0.000257	0.0827057
0.000258	0.0825352
0.000259	0.082389
0.00026	0.0822624
0.000261	0.0821455
0.000262	0.0820091
0.000263	0.0818288
0.000264	0.0816875
0.000265	0.0815804
0.000266	0.0814488
0.000267	0.0813416
0.000268	0.0812199
0.000269	0.0810786
0.00027	0.080947
0.000271	0.0808058
0.000272	0.0806645
0.000273	0.0805622
0.000274	0.0804745
0.000275	0.0804063
0.000276	0.0803089
0.000277	0.0801822
0.000278	0.0800409
0.000279	0.0798607
0.00028	0.0797194
0.000281	0.0796414
0.000282	0.0795538
0.000283	0.0794125
0.000284	0.0792615
0.000285	0.0791202
0.000286	0.0789545
0.000287	0.0788133
0.000288	0.0787305
0.000289	0.0785989
0.00029	0.0784382
0.000291	0.0783261
0.000292	0.0782433
0.000293	0.078141
0.000294	0.0780143
0.000295	0.077873
0.000296	0.0777659
0.000297	0.0776636
0.000298	0.0775466
0.000299	0.07742
0.0003	0.077269
0.000301	0.0771618
0.000302	0.0770741
0.000303	0.0769669
0.000304	0.07685
0.000305	0.0767526
0.000306	0.0766698
0.000307	0.0765772
0.000308	0.0764554
0.000309	0.0763287
0.00031	0.0762216
0.000311	0.0760998
0.000312	0.0759585
0.000313	0.0758318
0.000314	0.0756857
0.000315	0.0755541
0.000316	0.0754811
0.000317	0.0754129
0.000318	0.0753203
0.000319	0.0751888
0.00032	0.0750572
0.000321	0.0749501
0.000322	0.0748575
0.000323	0.0747552
0.000324	0.0746285
0.000325	0.0745311
0.000326	0.074458
0.000327	0.0743606
0.000328	0.0742632
0.000329	0.0741755
0.00033	0.0740829
0.000331	0.0740001
0.000332	0.0738978
0.000333	0.0737663
0.000334	0.0736493
0.000335	0.0735324
0.000336	0.0734252
0.000337	0.0733376
0.000338	0.0732645
0.000339	0.0731817
0.00034	0.0730745
0.000341	0.0729771
0.000342	0.0728699
0.000343	0.072753
0.000344	0.0726555
0.000345	0.0725435
0.000346	0.0724363
0.000347	0.0723535
0.000348	0.0722658
0.000349	0.0721976
0.00035	0.0721294
0.000351	0.0720514
0.000352	0.0719491
0.000353	0.0718371
0.000354	0.0717591
0.000355	0.0717007
0.000356	0.0716325
0.000357	0.0715692
0.000358	0.0715107
0.000359	0.0714279
0.00036	0.0713353
0.000361	0.0712135
0.000362	0.0711161
0.000363	0.0710528
0.000364	0.0709699
0.000365	0.0708969
0.000366	0.0708189
0.000367	0.0707117
0.000368	0.0705997
0.000369	0.0705315
0.00037	0.0704828
0.000371	0.0704243
0.000372	0.0703464
0.000373	0.070283
0.000374	0.0702295
0.000375	0.0701466
0.000376	0.0700784
0.000377	0.0699761
0.000378	0.0698592
0.000379	0.0697618
0.00038	0.0696497
0.000381	0.0695426
0.000382	0.0694549
0.000383	0.0693769
0.000384	0.0693087
0.000385	0.06926
0.000386	0.0691869
0.000387	0.0691041
0.000388	0.0690262
0.000389	0.0689287
0.00039	0.068841
0.000391	0.0687777
0.000392	0.0687339
0.000393	0.0686803
0.000394	0.0685975
0.000395	0.0685195
0.000396	0.0684318
0.000397	0.0683149
0.000398	0.0682467
0.000399	0.068198
0.0004	0.0681395
0.000401	0.0680567
0.000402	0.0679398
0.000403	0.067857
0.000404	0.0678083
0.000405	0.06774
0.000406	0.0676524
0.000407	0.0675842
0.000408	0.0675062
0.000409	0.0673893
0.00041	0.0672967
0.000411	0.0672383
0.000412	0.0671408
0.000413	0.067058
0.000414	0.0670093
0.000415	0.0669655
0.000416	0.0669167
0.000417	0.0668583
0.000418	0.0668144
0.000419	0.0667365
0.00042	0.0666683
0.000421	0.0666196
0.000422	0.0665368
0.000423	0.066488
0.000424	0.0664442
0.000425	0.0663857
0.000426	0.0663224
0.000427	0.0662298
0.000428	0.0661275
0.000429	0.0660496
0.00043	0.0659911
0.000431	0.0658986
0.000432	0.0658206
0.000433	0.0657524
0.000434	0.0656842
0.000435	0.065616
0.000436	0.0655137
0.000437	0.065426
0.000438	0.0653724
0.000439	0.0653237
0.00044	0.0652653
0.000441	0.0652068
0.000442	0.0651191
0.000443	0.0650363
0.000444	0.0649535
0.000445	0.0648804
0.000446	0.0648268
0.000447	0.0647537
0.000448	0.0646953
0.000449	0.0646319
0.00045	0.0645735
0.000451	0.0645053
0.000452	0.0643981
0.000453	0.0643153
0.000454	0.0642714
0.000455	0.0642325
0.000456	0.0641789
0.000457	0.0641156
0.000458	0.0640522
0.000459	0.0639889
0.00046	0.063945
0.000461	0.0638525
0.000462	0.0637307
0.000463	0.0636528
0.000464	0.0635992
0.000465	0.0635504
0.000466	0.063492
0.000467	0.0634092
0.000468	0.0632971
0.000469	0.0632094
0.00047	0.063151
0.000471	0.0630925
0.000472	0.0630341
0.000473	0.0629707
0.000474	0.0628976
0.000475	0.0628294
0.000476	0.0627661
0.000477	0.0627028
0.000478	0.0626443
0.000479	0.0625518
0.00048	0.0624592
0.000481	0.0624056
0.000482	0.0623569
0.000483	0.0623082
0.000484	0.0622789
0.000485	0.06224
0.000486	0.0621669
0.000487	0.0620743
0.000488	0.0619818
0.000489	0.0618941
0.00049	0.0618259
0.000491	0.0617967
0.000492	0.0617723
0.000493	0.0617382
0.000494	0.0616992
0.000495	0.0616651
0.000496	0.0616213
0.000497	0.0615531
0.000498	0.06148
0.000499	0.0614215
0.0005	0.0613728
0.000500999	0.0613241
0.000501999	0.0612559
0.000502999	0.0611828
0.000503999	0.0611439
0.000504999	0.0611195
0.000505999	0.0610805
0.000506999	0.0610367
0.000507999	0.0609928
0.000508999	0.0609198
0.000509999	0.0608564
0.000510999	0.0608028
0.000511999	0.0607395
0.000512999	0.0606957
0.000513999	0.0606518
0.000514999	0.0605885
0.000515999	0.0605349
0.000516999	0.0605008
0.000517999	0.0604472
0.000518999	0.060379
0.000519999	0.0603206
0.000520999	0.0602524
0.000521999	0.0601793
0.000522999	0.0601062
0.000523999	0.0600331
0.000524999	0.0599649
0.000525999	0.0598675
0.000526999	0.0597798
0.000527999	0.0597019
0.000528999	0.059619
0.000529999	0.0595606
0.000530999	0.0595265
0.000531999	0.059507
0.000532999	0.0594778
0.000533999	0.0594437
0.000534999	0.0593852
0.000535999	0.0592829
0.000536999	0.0591855
0.000537999	0.0591367
0.000538999	0.0591173
0.000539999	0.0590734
0.000540999	0.0590247
0.000541999	0.0589955
0.000542999	0.0589614
0.000543999	0.0589029
0.000544999	0.0588493
0.000545999	0.0588006
0.000546999	0.0587421
0.000547999	0.0586886
0.000548999	0.0586301
0.000549999	0.0585814
0.000550999	0.0585327
0.000551999	0.0584791
0.000552999	0.0584157
0.000553999	0.0583622
0.000554999	0.0583183
0.000555999	0.0582793
0.000556999	0.0582452
0.000557999	0.0581917
0.000558999	0.0581283
0.000559999	0.0580747
0.000560999	0.058026
0.000561999	0.0579822
0.000562999	0.0579432
0.000563999	0.0578847
0.000564999	0.0578311
0.000565999	0.0577824
0.000566999	0.0577337
0.000567999	0.0576753
0.000568999	0.0576168
0.000569999	0.057573
0.000570999	0.057534
0.000571999	0.0574804
0.000572999	0.0574073
0.000573999	0.0573635
0.000574999	0.0573391
0.000575999	0.0572904
0.000576999	0.0572319
0.000577999	0.057193
0.000578999	0.057154
0.000579999	0.0571199
0.000580999	0.0570809
0.000581999	0.0570225
0.000582999	0.0569884
0.000583999	0.0569543
0.000584999	0.0568958
0.000585999	0.0568471
0.000586999	0.0568178
0.000587999	0.0567837
0.000588999	0.0567448
0.000589999	0.0567155
0.000590999	0.0566766
0.000591999	0.056623
0.000592999	0.0565597
0.000593999	0.0564963
0.000594999	0.0564573
0.000595999	0.0564232
0.000596999	0.0563599
0.000597999	0.0562966
0.000598999	0.0562625
0.000599999	0.0562381
0.000600999	0.0561894
0.000601999	0.0561358
0.000602999	0.056092
0.000603999	0.056053
0.000604999	0.0560286
0.000605999	0.0559945
0.000606999	0.0559458
0.000607999	0.0558874
0.000608999	0.055824
0.000609999	0.0557753
0.000610999	0.0557363
0.000611999	0.0556974
0.000612999	0.0556681
0.000613999	0.0556438
0.000614999	0.0556194
0.000615999	0.0555853
0.000616999	0.0555366
0.000617999	0.0554928
0.000618999	0.0554489
0.000619999	0.0554099
0.000620999	0.0553807
0.000621999	0.0553466
0.000622999	0.0553028
0.000623999	0.0552589
0.000624999	0.0551907
0.000625999	0.055103
0.000626999	0.0550446
0.000627999	0.0550007
0.000628999	0.0549423
0.000629999	0.0548984
0.000630999	0.0548643
0.000631999	0.0548205
0.000632999	0.0547669
0.000633999	0.0546987
0.000634999	0.0546548
0.000635999	0.0546159
0.000636999	0.0545672
0.000637999	0.0545282
0.000638999	0.0544941
0.000639999	0.0544649
0.000640999	0.0544113
0.000641999	0.0543479
0.000642999	0.0542943
0.000644999	0.0542456
0.000645999	0.0542018
0.000646999	0.0541482
0.000647999	0.0540995
0.000648999	0.0540605
0.000649999	0.0540069
0.000650999	0.0539436
0.000651999	0.0538851
0.000652999	0.0538267
0.000653999	0.0537731
0.000654999	0.0537341
0.000655999	0.0537146
0.000656999	0.0536805
0.000657999	0.0536318
0.000658999	0.053588
0.000659999	0.053549
0.000660999	0.0535051
0.000661999	0.0534418
0.000662999	0.0533931
0.000663999	0.053359
0.000664999	0.0533298
0.000665999	0.0533054
0.000666999	0.053281
0.000667999	0.0532664
0.000668999	0.0532469
0.000669999	0.0532275
0.000670999	0.053208
0.000671999	0.053169
0.000672999	0.0531349
0.000673999	0.0531008
0.000674999	0.0530716
0.000675999	0.0530521
0.000676999	0.0530277
0.000677999	0.0529936
0.000678999	0.0529498
0.000680999	0.0529059
0.000682999	0.0528621
0.000683999	0.0528231
0.000684999	0.052789
0.000685999	0.0527403
0.000686999	0.0526818
0.000687999	0.0526429
0.000688999	0.0526136
0.000689999	0.0525747
0.000690999	0.0525259
0.000691999	0.052487
0.000692999	0.052448
0.000693999	0.0523847
0.000694999	0.0523213
0.000695999	0.0522824
0.000696999	0.0522483
0.000697999	0.0522093
0.000698999	0.0521606
0.000699999	0.052107
0.000700999	0.052068
0.000701999	0.0520485
0.000702999	0.052029
0.000703999	0.0519998
0.000704999	0.0519706
0.000705999	0.0519462
0.000706999	0.0519219
0.000707999	0.0518829
0.000708999	0.051839
0.000709999	0.0517952
0.000710999	0.0517514
0.000711999	0.0517173
0.000712999	0.0516637
0.000713999	0.0516149
0.000714999	0.0515857
0.000715999	0.0515516
0.000716999	0.0515273
0.000717999	0.0515029
0.000718999	0.0514591
0.000719999	0.0514055
0.000720999	0.0513665
0.000721999	0.0513275
0.000722999	0.0512788
0.000723999	0.051235
0.000724999	0.051196
0.000725999	0.0511619
0.000726999	0.0511327
0.000727999	0.0510986
0.000729999	0.0510547
0.000730999	0.0510206
0.000731999	0.0509962
0.000732999	0.050967
0.000733999	0.0509378
0.000734999	0.0509134
0.000735999	0.0508988
0.000736999	0.0508647
0.000737999	0.0508306
0.000738999	0.0508063
0.000739999	0.0507819
0.000740999	0.0507429
0.000741999	0.0506942
0.000742999	0.0506552
0.000743999	0.0506211
0.000744999	0.0506065
0.000745999	0.0505724
0.000746999	0.0505334
0.000747999	0.0505091
0.000748999	0.0504847
0.000749999	0.0504555
0.000750999	0.0504311
0.000751999	0.0504117
0.000752999	0.0503776
0.000753999	0.0503435
0.000754999	0.0503142
0.000755999	0.0502899
0.000756999	0.0502606
0.000757999	0.0502314
0.000758999	0.0501973
0.000759999	0.0501632
0.000760999	0.050134
0.000761999	0.0501047
0.000762999	0.0500658
0.000763999	0.0500317
0.000764999	0.0500219
0.000765999	0.0500073
0.000766999	0.0499635
0.000767999	0.0499001
0.000768999	0.0498612
0.000769999	0.0498417
0.000770999	0.0498222
0.000771999	0.049793
0.000772999	0.0497637
0.000773999	0.0497394
0.000774999	0.0497053
0.000775999	0.0496663
0.000776999	0.0496273
0.000777999	0.0495932
0.000778999	0.0495542
0.000779999	0.049486
0.000780999	0.0494325
0.000781999	0.0494032
0.000782999	0.049374
0.000783999	0.0493399
0.000784999	0.0492912
0.000785999	0.0492571
0.000786999	0.0492181
0.000787999	0.0491791
0.000788999	0.0491596
0.000789999	0.0491402
0.000790999	0.0491158
0.000791999	0.0490866
0.000792999	0.0490671
0.000793999	0.0490525
0.000794999	0.0490379
0.000795999	0.0490086
0.000796999	0.0489648
0.000797999	0.0489355
0.000798999	0.0488917
0.000800999	0.0488381
0.000801999	0.0487943
0.000802999	0.0487504
0.000804999	0.0487163
0.000805999	0.0486968
0.000806999	0.0486725
0.000807999	0.0486384
0.000808999	0.0486189
0.000809999	0.0486043
0.000810999	0.0485702
0.000811999	0.0485409
0.000812999	0.0485263
0.000813999	0.0485068
0.000814999	0.0484776
0.000815999	0.0484435
0.000816999	0.048424
0.000817999	0.0484045
0.000818999	0.0483851
0.000819999	0.0483656
0.000820999	0.0483461
0.000821999	0.0483169
0.000822999	0.0482827
0.000823999	0.0482681
0.000824999	0.0482194
0.000825999	0.0481561
0.000826999	0.0481171
0.000827999	0.0480879
0.000828999	0.0480538
0.000829999	0.0480099
0.000830999	0.047971
0.000831999	0.0479417
0.000832999	0.0479125
0.000833999	0.0478881
0.000834999	0.0478638
0.000835999	0.0478394
0.000836999	0.0478102
0.000837999	0.0477615
0.000838999	0.0477323
0.000839999	0.0477176
0.000840999	0.0476982
0.000841999	0.0476543
0.000842999	0.047591
0.000843999	0.0475569
0.000844999	0.0475325
0.000845999	0.0474935
0.000846999	0.0474594
0.000847999	0.0474253
0.000848999	0.0473912
0.000849999	0.0473571
0.000850999	0.0473279
0.000851999	0.0472987
0.000852999	0.0472694
0.000853999	0.0472353
0.000854999	0.0471915
0.000856999	0.0471574
0.000857999	0.0471379
0.000858999	0.0471233
0.000859999	0.0471087
0.000860999	0.0470941
0.000861999	0.0470697
0.000862999	0.0470113
0.000863999	0.0469528
0.000864999	0.0469284
0.000865999	0.0468943
0.000867999	0.0468456
0.000868999	0.0468115
0.000869999	0.0467872
0.000870999	0.0467628
0.000871999	0.0467433
0.000872999	0.0467238
0.000873999	0.0467043
0.000874999	0.0466849
0.000875999	0.0466508
0.000876999	0.046602
0.000877999	0.0465728
0.000878999	0.0465582
0.000879999	0.0465387
0.000881999	0.0465046
0.000882999	0.0464559
0.000884999	0.0464169
0.000885999	0.0463877
0.000886999	0.0463487
0.000887999	0.0463146
0.000888999	0.0463
0.000889999	0.0462903
0.000890999	0.0462659
0.000891999	0.0462367
0.000892999	0.0462172
0.000893999	0.0461879
0.000894999	0.0461587
0.000895999	0.0461441
0.000896999	0.0461197
0.000897999	0.0460759
0.000898999	0.0460369
0.000899999	0.0460028
0.000900999	0.045959
0.000901999	0.0459103
0.000902999	0.0458713
0.000903999	0.0458469
0.000904999	0.0458323
0.000905999	0.0458177
0.000906999	0.0458031
0.000907999	0.0457933
0.000908999	0.0457739
0.000909999	0.0457349
0.000910999	0.0457008
0.000911999	0.0456764
0.000912999	0.0456423
0.000913999	0.045618
0.000914999	0.0455936
0.000915999	0.0455644
0.000916999	0.04554
0.000917999	0.0455205
0.000918999	0.0455108
0.000919999	0.0454767
0.000921999	0.0454377
0.000922999	0.0453987
0.000923999	0.0453403
0.000924999	0.0453062
0.000925999	0.0452867
0.000926999	0.0452575
0.000927999	0.0452331
0.000928999	0.0452039
0.000929999	0.0451746
0.000930999	0.04516
0.000931999	0.0451454
0.000932999	0.0451211
0.000933999	0.0451016
0.000934999	0.045087
0.000935999	0.0450723
0.000936999	0.0450529
0.000937999	0.0450285
0.000938999	0.0450041
0.000939999	0.0449798
0.000941999	0.0449652
0.000942999	0.0449457
0.000943999	0.0449067
0.000944999	0.0448677
0.000945999	0.0448385
0.000946999	0.0447995
0.000947999	0.0447703
0.000948999	0.0447606
0.000949999	0.0447459
0.000950999	0.0447216
0.000951999	0.0446972
0.000952999	0.0446777
0.000953999	0.0446583
0.000954999	0.0446388
0.000955999	0.0446144
0.000957999	0.0445803
0.000958999	0.044556
0.000960999	0.0445365
0.000962999	0.0445121
0.000964999	0.0444926
0.000965999	0.0444634
0.000966999	0.0444293
0.000967999	0.0444049
0.000970999	0.0443757
0.000971999	0.0443513
0.000972999	0.0443367
0.000973999	0.0443221
0.000974999	0.0443026
0.000975999	0.0442685
0.000976999	0.0442393
0.000977999	0.0442149
0.000978999	0.0441954
0.000979999	0.0441808
0.000981999	0.0441516
0.000982999	0.0441175
0.000983999	0.0440931
0.000984999	0.0440737
0.000985999	0.044059
0.000986999	0.0440347
0.000987999	0.0440103
0.000988999	0.0439957
0.000989999	0.0439714
0.000990999	0.043947
0.000991999	0.0439129
0.000992999	0.0438837
0.000993999	0.0438739
0.000994999	0.0438642
0.000995999	0.0438544
0.000996999	0.0438398
0.000997999	0.0438252
0.000998999	0.0438155
0.000999999	0.0438057
0.001001	0.0437911
0.001002	0.0437619
0.001003	0.0437326
0.001004	0.043718
0.001005	0.0436985
0.001006	0.0436791
0.001007	0.0436693
0.001008	0.0436547
0.001009	0.0436157
0.00101	0.0435573
0.001011	0.0435085
0.001012	0.0434793
0.001013	0.0434598
0.001014	0.0434403
0.001015	0.0434062
0.001016	0.0433721
0.001017	0.0433478
0.001018	0.0433088
0.001019	0.043265
0.00102	0.0432309
0.001021	0.0432114
0.001022	0.0432016
0.001024	0.043187
0.001025	0.0431675
0.001026	0.0431334
0.001027	0.0430896
0.001028	0.0430409
0.001031	0.0430068
0.001032	0.0429775
0.001033	0.0429483
0.001034	0.0429337
0.001035	0.0429093
0.001036	0.0428801
0.001037	0.0428558
0.001038	0.0428265
0.001039	0.0427875
0.00104	0.0427486
0.001042	0.0427242
0.001043	0.0426999
0.001044	0.0426706
0.001045	0.042656
0.001046	0.0426414
0.001047	0.0426268
0.001048	0.042617
0.001049	0.0425976
0.00105	0.0425732
0.001052	0.042544
0.001053	0.0425196
0.001054	0.042505
0.001055	0.0424806
0.001056	0.0424611
0.001059	0.0424417
0.00106	0.0424222
0.001061	0.0424124
0.001062	0.0423978
0.001063	0.0423735
0.001064	0.042354
0.001065	0.0423442
0.001066	0.0423247
0.001068	0.0422906
0.001069	0.0422614
0.00107	0.0422419
0.001071	0.042203
0.001072	0.0421689
0.001073	0.0421542
0.001074	0.0421347
0.001075	0.0421055
0.001076	0.0420714
0.001077	0.0420519
0.001079	0.0420276
0.00108	0.0419886
0.001081	0.0419545
0.001082	0.0419253
0.001083	0.041896
0.001084	0.0418619
0.001085	0.0418278
0.001086	0.0418035
0.001088	0.0417889
0.001089	0.0417694
0.00109	0.041745
0.001091	0.0417304
0.001092	0.0417158
0.001093	0.0417012
0.001094	0.0416817
0.001095	0.0416622
0.001097	0.0416525
0.001098	0.0416378
0.001099	0.0416135
0.0011	0.0415794
0.001101	0.041555
0.001102	0.0415404
0.001103	0.0415112
0.001104	0.0414868
0.001105	0.0414722
0.001107	0.0414478
0.001108	0.0414284
0.001109	0.041404
0.00111	0.0413699
0.001111	0.0413504
0.001112	0.0413309
0.001113	0.0413114
0.001114	0.0413017
0.001115	0.041292
0.001116	0.0412822
0.001117	0.0412676
0.001118	0.041253
0.001119	0.0412432
0.00112	0.0412335
0.001121	0.0412238
0.001123	0.041214
0.001124	0.0412043
0.001125	0.0411848
0.001126	0.0411556
0.001127	0.0411361
0.001128	0.0411214
0.001129	0.041102
0.00113	0.0410776
0.001133	0.0410581
0.001134	0.0410435
0.001135	0.0410289
0.001136	0.0410045
0.001137	0.0409704
0.001138	0.0409412
0.001141	0.0409217
0.001142	0.0408974
0.001143	0.0408633
0.001144	0.0408194
0.001145	0.0407853
0.001146	0.0407707
0.001147	0.0407415
0.001148	0.0407122
0.00115	0.0406927
0.001151	0.0406781
0.001152	0.040644
0.001153	0.0406051
0.001154	0.0405904
0.001155	0.040571
0.001157	0.0405466
0.001158	0.0405271
0.001159	0.0405028
0.00116	0.0404784
0.001164	0.0404638
0.001166	0.040454
0.001168	0.0404345
0.001169	0.0404151
0.00117	0.0404053
0.001172	0.0403956
0.001173	0.040381
0.001174	0.0403517
0.001176	0.0403225
0.001177	0.0403079
0.001178	0.0402981
0.001179	0.0402884
0.00118	0.0402592
0.001181	0.0402299
0.001182	0.0402153
0.001183	0.0402007
0.001185	0.0401812
0.001186	0.0401617
0.001187	0.040152
0.001188	0.0401325
0.001189	0.0401082
0.001191	0.0400935
0.001192	0.040074
0.001193	0.0400497
0.001194	0.0400351
0.001195	0.0400156
0.001196	0.0399864
0.001197	0.0399669
0.001199	0.0399523
0.0012	0.0399279
0.001201	0.0398987
0.001202	0.0398694
0.001203	0.0398451
0.001204	0.039811
0.001205	0.039772
0.001206	0.0397476
0.001207	0.039733
0.001208	0.0397233
0.001209	0.0397087
0.001211	0.0396843
0.001212	0.0396648
0.001213	0.0396551
0.001214	0.0396405
0.001216	0.0396259
0.001217	0.0396112
0.001218	0.0395966
0.001219	0.039582
0.001221	0.0395674
0.001222	0.0395528
0.001226	0.0395382
0.001228	0.0395236
0.00123	0.0395041
0.001231	0.0394846
0.001233	0.03947
0.001235	0.0394602
0.001238	0.0394456
0.001239	0.0394261
0.00124	0.0394066
0.001241	0.0393774
0.001242	0.0393336
0.001243	0.0393043
0.001244	0.0392848
0.001245	0.0392654
0.001246	0.0392459
0.001247	0.0392264
0.001248	0.0391972
0.001249	0.0391533
0.00125	0.0391192
0.001251	0.03909
0.001252	0.0390656
0.001253	0.0390461
0.001254	0.0390266
0.001255	0.039012
0.001256	0.0390023
0.001257	0.0389925
0.001259	0.0389828
0.00126	0.0389731
0.001262	0.0389633
0.001264	0.0389438
0.001265	0.0389243
0.001267	0.0389146
0.001268	0.0388951
0.001269	0.0388659
0.00127	0.0388415
0.001271	0.0388269
0.001272	0.0388123
0.001274	0.0387977
0.001275	0.0387782
0.001276	0.0387587
0.001277	0.0387392
0.001278	0.0387149
0.00128	0.0386905
0.001281	0.0386613
0.001283	0.0386418
0.001285	0.0386174
0.001286	0.0385931
0.001289	0.0385736
0.00129	0.0385541
0.001293	0.0385346
0.001294	0.0385151
0.001297	0.0385005
0.001298	0.0384859
0.001299	0.0384762
0.0013	0.0384615
0.001301	0.0384469
0.001302	0.0384372
0.001304	0.0384226
0.001307	0.038408
0.001308	0.0383933
0.001309	0.0383641
0.001311	0.0383251
0.001312	0.0383008
0.001313	0.0382862
0.001314	0.0382618
0.001316	0.0382326
0.001317	0.0382131
0.001318	0.0382033
0.001319	0.0381887
0.00132	0.0381741
0.001321	0.0381546
0.001323	0.0381351
0.001324	0.0381157
0.001326	0.0380962
0.001327	0.0380816
0.001328	0.0380669
0.001329	0.0380426
0.00133	0.0380182
0.001331	0.0380085
0.001333	0.0379695
0.001334	0.0379208
0.001335	0.0378964
0.001336	0.0378818
0.001337	0.0378721
0.001338	0.0378623
0.001339	0.037838
0.00134	0.0378136
0.001341	0.0378039
0.001342	0.0377893
0.001343	0.0377649
0.001345	0.0377405
0.001346	0.0377211
0.001347	0.0376967
0.001348	0.0376723
0.001351	0.0376577
0.001352	0.037648
0.001353	0.0376382
0.001354	0.0376236
0.001355	0.0375798
0.001356	0.0375408
0.001357	0.0375116
0.001358	0.0374775
0.001359	0.0374629
0.00136	0.0374482
0.001361	0.0374239
0.001362	0.0374044
0.001363	0.0373898
0.001364	0.0373654
0.001365	0.0373362
0.001366	0.0373167
0.001367	0.0373021
0.001368	0.0372826
0.001369	0.0372631
0.00137	0.0372388
0.001371	0.0372193
0.001372	0.0372095
0.001373	0.0371949
0.001374	0.0371754
0.001375	0.0371608
0.001376	0.0371511
0.001377	0.0371413
0.001378	0.0371316
0.001379	0.0371218
0.001381	0.0371121
0.001382	0.0371024
0.001383	0.0370829
0.001386	0.0370634
0.001387	0.0370488
0.001388	0.0370342
0.00139	0.0370244
0.001391	0.0370049
0.001392	0.0369854
0.001394	0.0369757
0.001395	0.0369562
0.001397	0.036927
0.001398	0.0369075
0.001399	0.0368929
0.0014	0.0368783
0.001401	0.0368685
0.001402	0.0368442
0.001403	0.0368198
0.001405	0.0368101
0.001407	0.0367857
0.001408	0.0367613
0.001409	0.0367467
0.00141	0.0367321
0.001412	0.0367175
0.001413	0.0367029
0.001414	0.0366883
0.001415	0.0366688
0.001416	0.0366493
0.001418	0.0366249
0.001419	0.0366054
0.00142	0.0365957
0.001421	0.036586
0.001422	0.0365713
0.001424	0.036547
0.001425	0.0365275
0.001427	0.0365129
0.001429	0.0364885
0.001431	0.036469
0.001432	0.0364544
0.001433	0.0364349
0.001435	0.0364203
0.001436	0.0364106
0.001437	0.0364008
0.001438	0.0363521
0.001439	0.0363034
0.00144	0.0362888
0.001442	0.0362742
0.001443	0.0362644
0.001444	0.0362498
0.001445	0.0362352
0.001446	0.0362255
0.001447	0.0362157
0.001449	0.036206
0.00145	0.0361962
0.001452	0.0361816
0.001453	0.0361573
0.001454	0.0361232
0.001455	0.0360939
0.001456	0.0360696
0.001458	0.0360452
0.001459	0.0360306
0.001461	0.0360209
0.001462	0.0360062
0.001465	0.0359867
0.001466	0.0359575
0.001467	0.0359332
0.00147	0.0359185
0.001471	0.0358942
0.001472	0.0358747
0.001477	0.035865
0.001478	0.0358552
0.001479	0.0358406
0.00148	0.0358211
0.001481	0.0357968
0.001483	0.0357773
0.001484	0.0357578
0.001485	0.0357334
0.001486	0.0357091
0.001488	0.0356896
0.001489	0.0356798
0.00149	0.0356652
0.001491	0.0356457
0.001494	0.0356262
0.001497	0.0356019
0.001498	0.0355775
0.001499	0.035558
0.0015	0.0355434
0.001502	0.0355337
0.001503	0.0355191
0.001504	0.0355045
0.001506	0.0354947
0.001507	0.035485
0.001508	0.0354704
0.00151	0.0354557
0.001511	0.035446
0.001513	0.0354363
0.001515	0.0354216
0.001516	0.035407
0.001517	0.0353924
0.001518	0.0353778
0.00152	0.0353534
0.001521	0.0353291
0.001523	0.0353193
0.001524	0.0353047
0.001525	0.0352852
0.001526	0.0352706
0.001528	0.0352609
0.001529	0.0352414
0.001533	0.0352219
0.001535	0.0352122
0.001536	0.0352024
0.001538	0.0351829
0.001539	0.0351537
0.00154	0.0351342
0.001541	0.0351245
0.001542	0.0351099
0.001543	0.0350952
0.001545	0.0350855
0.001547	0.0350758
0.001549	0.035066
0.00155	0.0350563
0.001551	0.035027
0.001552	0.0349929
0.001553	0.0349686
0.001554	0.0349247
0.001557	0.0348906
0.001559	0.0348809
0.00156	0.0348614
0.001561	0.034837
0.001563	0.0348224
0.001564	0.0348127
0.001565	0.0347981
0.001566	0.0347835
0.001568	0.0347688
0.001569	0.0347542
0.00157	0.0347347
0.001571	0.0347153
0.001572	0.0347055
0.001573	0.0346763
0.001574	0.0346324
0.001575	0.0346081
0.001576	0.0345837
0.001577	0.0345594
0.001578	0.0345496
0.001579	0.0345399
0.001581	0.0345253
0.001582	0.0345106
0.001585	0.034496
0.001587	0.0344814
0.001589	0.0344717
0.00159	0.0344619
0.001591	0.0344522
0.001594	0.0344424
0.001596	0.0344327
0.001599	0.0344181
0.0016	0.0343937
0.001603	0.0343742
0.001604	0.0343645
0.001606	0.0343548
0.001607	0.0343353
0.001608	0.0343158
0.001609	0.034306
0.001611	0.0342914
0.001612	0.0342768
0.001614	0.0342622
0.001617	0.0342476
0.001619	0.034233
0.001621	0.0342183
0.001622	0.0342037
0.001625	0.0341891
0.001626	0.0341794
0.001627	0.0341648
0.001628	0.0341501
0.001629	0.0341355
0.001631	0.034116
0.001632	0.0341014
0.001634	0.0340819
0.001635	0.0340576
0.001636	0.0340235
0.001637	0.0339943
0.001638	0.0339699
0.001639	0.0339455
0.001641	0.0339358
0.001644	0.0339212
0.001645	0.0339066
0.001647	0.0338919
0.001648	0.0338627
0.001649	0.0338286
0.00165	0.0338043
0.001651	0.0337896
0.001652	0.0337799
0.001653	0.0337653
0.001654	0.0337458
0.001655	0.0337263
0.001657	0.0337117
0.001659	0.0336922
0.00166	0.0336727
0.001661	0.033663
0.001662	0.0336435
0.001663	0.033624
0.001665	0.0336143
0.00167	0.0336045
0.001671	0.0335802
0.001672	0.0335509
0.001677	0.0335363
0.001678	0.0335266
0.001679	0.0335168
0.001682	0.0335022
0.001683	0.0334876
0.001687	0.0334779
0.001689	0.0334632
0.00169	0.0334486
0.001692	0.0334389
0.001693	0.0334243
0.001694	0.0334097
0.001695	0.033395
0.001696	0.0333804
0.001697	0.0333658
0.0017	0.0333463
0.001701	0.0333268
0.001704	0.0333122
0.001706	0.0333025
0.001707	0.0332927
0.001708	0.0332781
0.001709	0.0332635
0.001712	0.0332538
0.001713	0.0332391
0.001714	0.0332197
0.001715	0.033205
0.001716	0.0331807
0.001717	0.0331563
0.001718	0.0331466
0.00172	0.0331368
0.001721	0.0331271
0.001723	0.0331174
0.001725	0.0330979
0.001726	0.0330784
0.001728	0.0330686
0.001729	0.0330589
0.00173	0.0330492
0.001731	0.0330345
0.001734	0.0330151
0.001735	0.0330004
0.001738	0.0329907
0.00174	0.0329761
0.001741	0.0329615
0.001742	0.0329517
0.001743	0.032942
0.001747	0.0329225
0.001748	0.032903
0.00175	0.0328884
0.001751	0.0328689
0.001752	0.0328494
0.001753	0.0328299
0.001757	0.0328153
0.001761	0.0328007
0.001765	0.0327812
0.001766	0.0327666
0.001767	0.0327569
0.001768	0.0327422
0.00177	0.0327276
0.001771	0.0327179
0.001772	0.0327081
0.001773	0.0326935
0.001774	0.0326789
0.001776	0.0326594
0.001777	0.0326399
0.001778	0.0326302
0.001786	0.0326156
0.001788	0.032601
0.00179	0.0325863
0.001794	0.0325717
0.001795	0.0325571
0.001796	0.0325376
0.001797	0.0325181
0.0018	0.0325035
0.001801	0.032484
0.001802	0.0324646
0.001803	0.0324548
0.001804	0.0324451
0.001805	0.0324353
0.001806	0.0324158
0.001807	0.0323817
0.001808	0.0323574
0.001809	0.032333
0.00181	0.0323087
0.001811	0.0322892
0.001812	0.0322697
0.001813	0.03226
0.001816	0.0322453
0.001817	0.032221
0.001819	0.0321966
0.001821	0.032182
0.001822	0.0321723
0.001824	0.0321625
0.001825	0.0321528
0.001826	0.032143
0.001827	0.0321333
0.001828	0.0321235
0.001829	0.0321089
0.00183	0.0320943
0.001833	0.0320797
0.001835	0.0320651
0.001836	0.0320505
0.001838	0.0320359
0.00184	0.0320261
0.001842	0.0320115
0.001844	0.031992
0.001845	0.0319774
0.001847	0.0319579
0.001848	0.0319384
0.001849	0.0319238
0.00185	0.0319043
0.001851	0.0318897
0.001852	0.03188
0.001853	0.0318702
0.001854	0.0318605
0.001855	0.0318459
0.001857	0.0318312
0.001859	0.0318215
0.00186	0.0318118
0.001863	0.031802
0.001866	0.0317728
0.001867	0.0317387
0.001868	0.0317241
0.001871	0.0317143
0.001873	0.0316948
0.001874	0.0316705
0.001875	0.0316559
0.001876	0.0316461
0.001882	0.0316315
0.001888	0.0316169
0.001889	0.0316023
0.001893	0.0315877
0.001894	0.0315779
0.001896	0.0315633
0.001897	0.0315341
0.001899	0.0315048
0.0019	0.0314902
0.001902	0.0314805
0.001904	0.0314659
0.001906	0.0314415
0.001908	0.0314172
0.00191	0.0314025
0.001911	0.0313928
0.001912	0.0313782
0.001914	0.0313636
0.001915	0.0313538
0.001916	0.0313441
0.001917	0.0313343
0.001918	0.0313197
0.001919	0.0313051
0.00192	0.0312905
0.001921	0.0312759
0.001922	0.0312661
0.001923	0.0312467
0.001924	0.0312272
0.001925	0.0312174
0.001927	0.0312077
0.001929	0.0311979
0.00193	0.0311882
0.001931	0.0311736
0.001932	0.031159
0.001933	0.0311492
0.001935	0.0311395
0.001936	0.0311297
0.001939	0.03112
0.001941	0.0311102
0.001943	0.0310956
0.001944	0.0310761
0.001947	0.0310567
0.001948	0.031042
0.001949	0.0310323
0.00195	0.0310226
0.001952	0.0310031
0.001954	0.0309836
0.001955	0.0309641
0.001956	0.0309446
0.001958	0.0309349
0.001959	0.0309154
0.00196	0.0308959
0.001961	0.0308861
0.001962	0.0308764
0.001963	0.0308569
0.001964	0.0308326
0.001965	0.0308179
0.001968	0.0308033
0.001969	0.0307887
0.001972	0.0307741
0.001976	0.0307595
0.001978	0.0307497
0.001979	0.0307254
0.001981	0.0306962
0.001982	0.0306815
0.001984	0.0306621
0.001985	0.0306426
0.001986	0.0306328
0.001987	0.0306231
0.001989	0.0306085
0.00199	0.0305792
0.001992	0.0305451
0.001993	0.0305208
0.001996	0.0305062
0.001999	0.0304964
0.002	0.0304867
0.002001	0.0304769
0.002002	0.0304672
0.002004	0.0304574
0.002005	0.0304428
0.002008	0.0304282
0.002009	0.0304185
0.00201	0.0304039
0.002011	0.0303892
0.002012	0.0303795
0.002014	0.0303698
0.002015	0.0303551
0.002016	0.0303405
0.002021	0.0303308
0.002023	0.030321
0.002026	0.0303113
0.002027	0.0303016
0.00203	0.0302918
0.002031	0.0302821
0.002032	0.0302723
0.002035	0.0302528
0.002038	0.0302334
0.002039	0.0302236
0.002043	0.0302139
0.002045	0.0302041
0.002049	0.0301944
0.002053	0.0301749
0.002058	0.0301554
0.002062	0.0301408
0.002065	0.0301262
0.002066	0.0301116
0.002067	0.0300872
0.002068	0.0300628
0.002071	0.0300434
0.002072	0.0300287
0.002074	0.0300141
0.002075	0.0299946
0.002076	0.02998
0.002079	0.0299557
0.002082	0.0299216
0.002084	0.0299021
0.002088	0.0298923
0.002089	0.0298826
0.00209	0.029868
0.002091	0.0298485
0.002094	0.0298339
0.002096	0.0298241
0.002101	0.0298046
0.002103	0.0297852
0.002108	0.0297754
0.002113	0.0297511
0.002114	0.0297218
0.002116	0.0297072
0.002118	0.0296975
0.002119	0.0296877
0.00212	0.029678
0.002122	0.0296682
0.002124	0.0296585
0.002125	0.0296439
0.002126	0.0296293
0.00213	0.0296195
0.002132	0.0295952
0.002133	0.0295611
0.002134	0.0295367
0.002135	0.0295221
0.002142	0.0295026
0.002144	0.0294831
0.002145	0.0294734
0.002146	0.0294588
0.002147	0.0294441
0.002148	0.0294344
0.002149	0.02941
0.00215	0.0293857
0.002152	0.0293759
0.002153	0.0293565
0.002154	0.0293321
0.002155	0.0293175
0.002156	0.0293029
0.002159	0.0292883
0.002161	0.0292736
0.002162	0.029259
0.002163	0.0292493
0.002167	0.0292298
0.002168	0.0292103
0.00217	0.0291957
0.002171	0.0291762
0.002172	0.0291616
0.002173	0.029147
0.002175	0.0291324
0.002176	0.0291226
0.002177	0.0291129
0.002178	0.0291031
0.002179	0.0290836
0.00218	0.0290593
0.002181	0.0290447
0.002183	0.0290349
0.002184	0.0290252
0.002185	0.0290057
0.002187	0.0289813
0.002188	0.0289667
0.00219	0.0289521
0.002192	0.0289278
0.002193	0.0289034
0.002197	0.0288888
0.0022	0.0288693
0.002202	0.0288498
0.002206	0.0288401
0.002208	0.0288303
0.002209	0.0288206
0.00221	0.0288108
0.002214	0.0288011
0.002219	0.0287913
0.00222	0.0287816
0.002221	0.0287719
0.002222	0.0287572
0.002224	0.0287426
0.002225	0.0287329
0.002229	0.0287231
0.00223	0.0287085
0.002231	0.0286744
0.002232	0.0286403
0.002236	0.0286257
0.002239	0.028616
0.002241	0.0286062
0.002244	0.0285916
0.002245	0.028577
0.002246	0.0285673
0.002247	0.0285575
0.002249	0.0285478
0.002254	0.028538
0.002255	0.0285234
0.002257	0.0285088
0.00226	0.0284991
0.002261	0.0284893
0.002263	0.0284747
0.002264	0.0284601
0.002265	0.0284503
0.002268	0.0284406
0.002269	0.028426
0.002271	0.0284114
0.002272	0.0284016
0.002273	0.0283821
0.002274	0.0283626
0.002277	0.0283529
0.00228	0.0283432
0.002285	0.0283334
0.002288	0.0283237
0.002289	0.0283139
0.00229	0.0283042
0.002292	0.0282944
0.002293	0.0282847
0.002295	0.028275
0.002298	0.0282652
0.002299	0.0282506
0.0023	0.028236
0.002301	0.0282262
0.002303	0.0282165
0.002304	0.0282068
0.002305	0.028197
0.002307	0.0281873
0.002309	0.0281775
0.00231	0.0281678
0.002311	0.028158
0.002312	0.0281483
0.002313	0.0281385
0.002314	0.0281288
0.002316	0.0281191
0.002318	0.0281044
0.002319	0.0280898
0.002322	0.0280801
0.002325	0.0280655
0.002326	0.0280509
0.002331	0.0280362
0.002332	0.0280216
0.002333	0.028007
0.002335	0.0279875
0.002339	0.027968
0.002341	0.0279437
0.002343	0.0279242
0.002347	0.0279145
0.002348	0.0279047
0.002349	0.027895
0.002355	0.0278852
0.002356	0.0278755
0.002357	0.0278657
0.002358	0.027856
0.002359	0.0278463
0.00236	0.0278316
0.002363	0.027817
0.002364	0.0278073
0.002369	0.0277975
0.002372	0.0277878
0.002376	0.027778
0.002377	0.0277683
0.002378	0.0277586
0.002379	0.0277439
0.00238	0.0277293
0.002382	0.0277196
0.002383	0.0277098
0.002384	0.0277001
0.002387	0.0276904
0.002388	0.0276806
0.00239	0.0276709
0.002391	0.0276611
0.002395	0.0276465
0.002397	0.027627
0.002398	0.0276124
0.002399	0.0276027
0.002401	0.0275929
0.002402	0.0275832
0.002405	0.0275734
0.002406	0.0275637
0.002407	0.027554
0.002413	0.0275393
0.002415	0.0275247
0.002416	0.0275101
0.00242	0.0274906
0.002422	0.027476
0.002423	0.0274663
0.002426	0.0274565
0.002427	0.0274419
0.002428	0.0274273
0.002429	0.0274175
0.00243	0.0274078
0.002432	0.0273932
0.002433	0.0273737
0.002434	0.0273591
0.002435	0.0273493
0.002438	0.0273396
0.002444	0.027325
0.002446	0.0273104
0.00245	0.0273006
0.002451	0.0272909
0.002453	0.0272811
0.002455	0.0272714
0.002456	0.0272568
0.002457	0.0272422
0.002463	0.0272324
0.002465	0.0272227
0.002467	0.0272129
0.002471	0.0272032
0.002472	0.0271935
0.002474	0.0271837
0.002476	0.027174
0.002477	0.0271642
0.002478	0.0271496
0.002483	0.027135
0.002484	0.0271252
0.00249	0.0271058
0.002491	0.0270814
0.002492	0.027057
0.002494	0.0270376
0.002497	0.0270278
0.0025	0.0270181
0.002501	0.0270083
0.002505	0.0269986
0.002509	0.0269791
0.002511	0.0269547
0.002513	0.0269401
0.002517	0.0269304
0.002518	0.0269206
0.002519	0.0269109
0.002523	0.0269012
0.002524	0.0268865
0.002526	0.0268719
0.002529	0.0268622
0.002532	0.0268476
0.002533	0.0268281
0.002536	0.0268086
0.002537	0.026794
0.002538	0.0267794
0.002539	0.0267647
0.002542	0.026755
0.002547	0.0267453
0.00255	0.0267355
0.002551	0.026716
0.002552	0.0266965
0.002555	0.0266868
0.002556	0.0266673
0.002558	0.026643
0.00256	0.0266235
0.002561	0.0266089
0.002562	0.0265942
0.002563	0.0265796
0.002564	0.026565
0.002567	0.0265407
0.002574	0.0265163
0.002575	0.0265017
0.002578	0.0264919
0.00258	0.0264822
0.002584	0.0264725
0.002587	0.0264627
0.002588	0.026453
0.002589	0.0264286
0.00259	0.0263896
0.002594	0.0263555
0.002597	0.026336
0.002598	0.0263263
0.002601	0.0263166
0.002603	0.0263068
0.002606	0.0262922
[truncated: 2,505 more rows]

## Sheet: s=-0.1
0	0.994467
9.99999e-07	0.848921
2e-06	0.652529
3e-06	0.560246
4e-06	0.500191
5e-06	0.458659
5.99999e-06	0.427716
6.99999e-06	0.402641
7.99999e-06	0.381891
8.99999e-06	0.364651
9.99999e-06	0.349739
1.1e-05	0.336577
1.2e-05	0.32507
1.3e-05	0.314978
1.4e-05	0.305784
1.5e-05	0.297528
1.6e-05	0.290059
1.7e-05	0.283143
1.8e-05	0.276592
1.9e-05	0.270497
2e-05	0.264804
2.1e-05	0.259362
2.2e-05	0.254472
2.3e-05	0.249997
2.4e-05	0.245764
2.5e-05	0.241822
2.6e-05	0.237864
2.7e-05	0.234002
2.8e-05	0.230405
2.9e-05	0.22717
3e-05	0.224356
3.1e-05	0.221668
3.2e-05	0.218919
3.3e-05	0.216145
3.4e-05	0.213422
3.5e-05	0.210793
3.6e-05	0.208325
3.7e-05	0.205983
3.8e-05	0.203696
3.9e-05	0.201393
4e-05	0.199161
4.1e-05	0.19711
4.2e-05	0.195103
4.3e-05	0.193137
4.4e-05	0.191246
4.5e-05	0.189526
4.6e-05	0.187901
4.7e-05	0.18619
4.8e-05	0.18456
4.9e-05	0.18302
5e-05	0.181455
5.09999e-05	0.17995
5.19999e-05	0.178551
5.29999e-05	0.177242
5.39999e-05	0.175933
5.49999e-05	0.174523
5.59999e-05	0.173039
5.69999e-05	0.171679
5.79999e-05	0.17049
5.89999e-05	0.169327
5.99999e-05	0.168128
6.09999e-05	0.166934
6.19999e-05	0.16575
6.29999e-05	0.164577
6.39999e-05	0.163463
6.49999e-05	0.16241
6.59999e-05	0.161462
6.69999e-05	0.160534
6.79999e-05	0.159526
6.89999e-05	0.158523
6.99999e-05	0.157469
7.09999e-05	0.156401
7.19999e-05	0.155498
7.29999e-05	0.154625
7.39999e-05	0.153702
7.49999e-05	0.15287
7.59999e-05	0.152052
7.69999e-05	0.151239
7.79999e-05	0.150502
7.89999e-05	0.149745
7.99999e-05	0.149002
8.09999e-05	0.14823
8.19999e-05	0.147367
8.29999e-05	0.146499
8.39999e-05	0.145752
8.49999e-05	0.145085
8.59999e-05	0.144388
8.69999e-05	0.14364
8.79999e-05	0.142823
8.89999e-05	0.14207
8.99999e-05	0.141413
9.09999e-05	0.140736
9.19999e-05	0.140084
9.29999e-05	0.139402
9.39999e-05	0.138715
9.49999e-05	0.138028
9.59999e-05	0.13738
9.69999e-05	0.136814
9.79999e-05	0.136172
9.89999e-05	0.135479
9.99999e-05	0.134863
0.000101	0.134336
0.000102	0.133834
0.000103	0.133338
0.000104	0.132811
0.000105	0.132229
0.000106	0.131602
0.000107	0.131101
0.000108	0.130584
0.000109	0.129992
0.00011	0.12949
0.000111	0.129004
0.000112	0.128522
0.000113	0.128111
0.000114	0.1277
0.000115	0.127173
0.000116	0.126626
0.000117	0.126105
0.000118	0.125583
0.000119	0.125107
0.00012	0.12469
0.000121	0.124304
0.000122	0.123883
0.000123	0.123446
0.000124	0.123005
0.000125	0.122574
0.000126	0.122137
0.000127	0.121646
0.000128	0.121224
0.000129	0.120748
0.00013	0.120271
0.000131	0.119885
0.000132	0.119444
0.000133	0.118967
0.000134	0.118536
0.000135	0.11815
0.000136	0.117738
0.000137	0.117332
0.000138	0.116971
0.000139	0.11664
0.00014	0.116264
0.000141	0.115817
0.000142	0.115441
0.000143	0.1151
0.000144	0.114734
0.000145	0.114423
0.000146	0.114117
0.000147	0.113811
0.000148	0.11354
0.000149	0.113244
0.00015	0.112948
0.000151	0.112672
0.000152	0.112366
0.000153	0.11205
0.000154	0.111669
0.000155	0.111368
0.000156	0.111127
0.000157	0.110861
0.000158	0.110586
0.000159	0.110249
0.00016	0.109933
0.000161	0.109668
0.000162	0.109422
0.000163	0.109116
0.000164	0.108735
0.000165	0.108384
0.000166	0.108108
0.000167	0.107867
0.000168	0.107636
0.000169	0.10731
0.00017	0.106974
0.000171	0.106728
0.000172	0.106483
0.000173	0.106257
0.000174	0.106016
0.000175	0.105735
0.000176	0.105494
0.000177	0.105274
0.000178	0.105028
0.000179	0.104777
0.00018	0.104491
0.000181	0.10417
0.000182	0.103854
0.000183	0.103583
0.000184	0.103358
0.000185	0.103142
0.000186	0.102956
0.000187	0.102736
0.000188	0.102425
0.000189	0.102174
0.00019	0.101968
0.000191	0.101753
0.000192	0.101562
0.000193	0.101341
0.000194	0.101126
0.000195	0.100915
0.000196	0.100719
0.000197	0.100514
0.000198	0.100283
0.000199	0.100002
0.0002	0.0997462
0.000201	0.0995556
0.000202	0.0993349
0.000203	0.0991393
0.000204	0.0989186
0.000205	0.0986878
0.000206	0.0984822
0.000207	0.0982264
0.000208	0.0979706
0.000209	0.09778
0.00021	0.0975843
0.000211	0.0973687
0.000212	0.0972031
0.000213	0.0970426
0.000214	0.0968821
0.000215	0.0967066
0.000216	0.096521
0.000217	0.0963304
0.000218	0.0960996
0.000219	0.0959341
0.00022	0.0957937
0.000221	0.095568
0.000222	0.0953673
0.000223	0.0951968
0.000224	0.0950212
0.000225	0.0948758
0.000226	0.0946751
0.000227	0.0944594
0.000228	0.0942688
0.000229	0.0940481
0.00023	0.0938174
0.000231	0.0936168
0.000232	0.0934362
0.000233	0.0932657
0.000234	0.0931051
0.000235	0.0929446
0.000236	0.0928042
0.000237	0.0926387
0.000238	0.0924631
0.000239	0.0922625
0.00024	0.0920368
0.000241	0.0918462
0.000242	0.0916907
0.000243	0.0915352
0.000244	0.0914248
0.000245	0.0913295
0.000246	0.0911841
0.000247	0.0910235
0.000248	0.0908129
0.000249	0.0906022
0.00025	0.0904216
0.000251	0.0902461
0.000252	0.0900806
0.000253	0.0898849
0.000254	0.0896743
0.000255	0.0895188
0.000256	0.0893984
0.000257	0.0892128
0.000258	0.0890021
0.000259	0.0888567
0.00026	0.0887062
0.000261	0.0885557
0.000262	0.0884353
0.000263	0.088315
0.000264	0.0881845
0.000265	0.0880541
0.000266	0.0879037
0.000267	0.0877532
0.000268	0.0876177
0.000269	0.0874572
0.00027	0.0873017
0.000271	0.0871312
0.000272	0.0869707
0.000273	0.0868403
0.000274	0.0866848
0.000275	0.0865042
0.000276	0.0863287
0.000277	0.0861782
0.000278	0.0860327
0.000279	0.0858973
0.00028	0.0857819
0.000281	0.0856565
0.000282	0.0855412
0.000283	0.0854108
0.000284	0.0852803
0.000285	0.08516
0.000286	0.0850195
0.000287	0.0848741
0.000288	0.0847386
0.000289	0.0846132
0.00029	0.0844778
0.000291	0.0843624
0.000292	0.0842521
0.000293	0.0841668
0.000294	0.0840665
0.000295	0.083906
0.000296	0.0837405
0.000297	0.0836
0.000298	0.0834997
0.000299	0.0834094
0.0003	0.0832991
0.000301	0.0831887
0.000302	0.0830583
0.000303	0.0829479
0.000304	0.0828376
0.000305	0.0826971
0.000306	0.0825868
0.000307	0.0824965
0.000308	0.0823811
0.000309	0.0822558
0.00031	0.0821203
0.000311	0.0819749
0.000312	0.0818695
0.000313	0.0817742
0.000314	0.0816639
0.000315	0.0815335
0.000316	0.0813579
0.000317	0.0811773
0.000318	0.081067
0.000319	0.0809667
0.00032	0.0808513
0.000321	0.080746
0.000322	0.0806306
0.000323	0.0805253
0.000324	0.0804049
0.000325	0.0802745
0.000326	0.080134
0.000327	0.0799835
0.000328	0.0798732
0.000329	0.0797628
0.00033	0.0796375
0.000331	0.0795171
0.000332	0.0793816
0.000333	0.0792362
0.000334	0.0791258
0.000335	0.0790355
0.000336	0.0789603
0.000337	0.0789051
0.000338	0.0788199
0.000339	0.0786995
0.00034	0.0785741
0.000341	0.0784637
0.000342	0.0783935
0.000343	0.0783082
0.000344	0.0782029
0.000345	0.0781377
0.000346	0.0780926
0.000347	0.0780173
0.000348	0.077907
0.000349	0.0778167
0.00035	0.0777414
0.000351	0.0776461
0.000352	0.0775408
0.000353	0.0774305
0.000354	0.0773151
0.000355	0.0772248
0.000356	0.0771345
0.000357	0.0770492
0.000358	0.0769539
0.000359	0.0768536
0.00036	0.0767734
0.000361	0.0766781
0.000362	0.0765677
0.000363	0.0764323
0.000364	0.0763219
0.000365	0.0762266
0.000366	0.0761313
0.000367	0.0760561
0.000368	0.0759508
0.000369	0.0758504
0.00037	0.0757702
0.000371	0.075695
0.000372	0.0755997
0.000373	0.0754993
0.000374	0.0754391
0.000375	0.0753639
0.000376	0.0752836
0.000377	0.0752034
0.000378	0.0751081
0.000379	0.0750078
0.00038	0.0749175
0.000381	0.0748071
0.000382	0.0746918
0.000383	0.0746015
0.000384	0.0745112
0.000385	0.074441
0.000386	0.0743657
0.000387	0.0742905
0.000388	0.0742153
0.000389	0.074125
0.00039	0.0740297
0.000391	0.0739093
0.000392	0.073819
0.000393	0.0737638
0.000394	0.0736836
0.000395	0.0736184
0.000396	0.0735682
0.000397	0.0735181
0.000398	0.0734478
0.000399	0.0733776
0.0004	0.0733074
0.000401	0.0732221
0.000402	0.0731469
0.000403	0.0730666
0.000404	0.0729964
0.000405	0.0729212
0.000406	0.0728158
0.000407	0.0727105
0.000408	0.0726302
0.000409	0.0725801
0.00041	0.0725048
0.000411	0.0724146
0.000412	0.0723493
0.000413	0.0722741
0.000414	0.0722139
0.000415	0.0721487
0.000416	0.0720333
0.000417	0.0719029
0.000418	0.0717976
0.000419	0.0717123
0.00042	0.0716421
0.000421	0.0715869
0.000422	0.0715267
0.000423	0.0714465
0.000424	0.0713612
0.000425	0.0712759
0.000426	0.0711957
0.000427	0.0711305
0.000428	0.0710502
0.000429	0.0709599
0.00043	0.0708847
0.000431	0.0708045
0.000432	0.0707242
0.000433	0.070659
0.000434	0.0705988
0.000435	0.0705185
0.000436	0.0704283
0.000437	0.0703681
0.000438	0.0703129
0.000439	0.0702627
0.00044	0.0702276
0.000441	0.0701574
0.000442	0.0700671
0.000443	0.0699969
0.000444	0.0699367
0.000445	0.0698865
0.000446	0.0698464
0.000447	0.0697762
0.000448	0.069711
0.000449	0.0696608
0.00045	0.0695806
0.000451	0.0695003
0.000452	0.0694451
0.000453	0.069395
0.000454	0.0693448
0.000455	0.0693047
0.000456	0.0692495
0.000457	0.0691793
0.000458	0.069094
0.000459	0.0690138
0.00046	0.0689486
0.000461	0.0688733
0.000462	0.0687931
0.000463	0.0687279
0.000464	0.0686526
0.000465	0.0685523
0.000466	0.0684269
0.000467	0.0683316
0.000468	0.0682664
0.000469	0.0681912
0.00047	0.068131
0.000471	0.0680608
0.000472	0.0679805
0.000473	0.0679002
0.000474	0.06781
0.000475	0.0677347
0.000476	0.0676745
0.000477	0.0676143
0.000478	0.0675742
0.000479	0.0675341
0.00048	0.0674789
0.000481	0.0674338
0.000482	0.0673936
0.000483	0.0673134
0.000484	0.0672181
0.000485	0.0671479
0.000486	0.0670927
0.000487	0.0670526
0.000488	0.0669974
0.000489	0.0669472
0.00049	0.0668971
0.000491	0.0668369
0.000492	0.0667917
0.000493	0.0667215
0.000494	0.0666613
0.000495	0.0666011
0.000496	0.0665209
0.000497	0.0664607
0.000498	0.0663905
0.000499	0.0662952
0.0005	0.0662099
0.000500999	0.0661296
0.000501999	0.0660494
0.000502999	0.0659842
0.000503999	0.065924
0.000504999	0.0658638
0.000505999	0.0658036
0.000506999	0.0657434
0.000507999	0.0656932
0.000508999	0.0656682
0.000509999	0.0656531
0.000510999	0.0656331
0.000511999	0.0655829
0.000512999	0.0654926
0.000513999	0.0654224
0.000514999	0.0653923
0.000515999	0.0653472
0.000516999	0.0652719
0.000517999	0.0652117
0.000518999	0.0651666
0.000519999	0.0651164
0.000520999	0.0650612
0.000521999	0.0650011
0.000522999	0.0649158
0.000523999	0.0648355
0.000524999	0.0647854
0.000525999	0.0647202
0.000526999	0.06466
0.000527999	0.0645948
0.000528999	0.0645346
0.000529999	0.0644944
0.000530999	0.0644343
0.000531999	0.0643741
0.000532999	0.0643189
0.000533999	0.0642537
0.000534999	0.0641885
0.000535999	0.0641183
0.000536999	0.0640631
0.000537999	0.064043
0.000538999	0.0640079
0.000539999	0.0639427
0.000540999	0.0638875
0.000541999	0.0638574
0.000542999	0.0638023
0.000543999	0.0637421
0.000544999	0.063707
0.000545999	0.0636468
0.000546999	0.0635816
0.000547999	0.0635264
0.000548999	0.0634712
0.000549999	0.063416
0.000550999	0.0633558
0.000551999	0.0633007
0.000553999	0.0632254
0.000554999	0.0631351
0.000555999	0.0630499
0.000556999	0.0629646
0.000557999	0.0628944
0.000558999	0.0628342
0.000559999	0.0627941
0.000560999	0.0627539
0.000561999	0.0626937
0.000562999	0.0626486
0.000563999	0.0625984
0.000564999	0.0625382
0.000565999	0.0624781
0.000566999	0.0624078
0.000567999	0.0623527
0.000568999	0.0623226
0.000569999	0.0622674
0.000570999	0.0621972
0.000571999	0.062157
0.000572999	0.0621269
0.000573999	0.0620718
0.000574999	0.0620116
0.000575999	0.0619714
0.000576999	0.0619363
0.000577999	0.0618962
0.000578999	0.0618461
0.000579999	0.0617909
0.000580999	0.0617307
0.000581999	0.0616855
0.000582999	0.0616304
0.000583999	0.0615702
0.000584999	0.0615351
0.000585999	0.0614949
0.000586999	0.0614347
0.000587999	0.0613946
0.000588999	0.0613545
0.000589999	0.0612793
0.000590999	0.0612241
0.000591999	0.061194
0.000592999	0.0611589
0.000593999	0.0610937
0.000594999	0.0610184
0.000595999	0.0609633
0.000596999	0.0609231
0.000597999	0.060888
0.000598999	0.0608328
0.000599999	0.0607726
0.000600999	0.0607275
0.000601999	0.0606773
0.000602999	0.0606222
0.000603999	0.060572
0.000604999	0.0605369
0.000605999	0.0604968
0.000606999	0.0604516
0.000607999	0.0604065
0.000608999	0.0603463
0.000609999	0.0602911
0.000610999	0.060241
0.000611999	0.0601808
0.000612999	0.0601156
0.000613999	0.0600754
0.000614999	0.0600353
0.000615999	0.0599651
0.000616999	0.0599099
0.000617999	0.0598648
0.000618999	0.0598246
0.000619999	0.0597945
0.000620999	0.0597594
0.000621999	0.0596992
0.000622999	0.059629
0.000623999	0.0595738
0.000624999	0.0595337
0.000625999	0.0594986
0.000626999	0.0594434
0.000627999	0.0594083
0.000628999	0.0593933
0.000629999	0.0593531
0.000630999	0.059313
0.000631999	0.0592879
0.000632999	0.0592578
0.000633999	0.0592077
0.000634999	0.0591625
0.000635999	0.0591224
0.000636999	0.0590773
0.000637999	0.0590271
0.000638999	0.058977
0.000639999	0.0589469
0.000640999	0.0589168
0.000641999	0.0588917
0.000642999	0.0588666
0.000643999	0.0588415
0.000644999	0.0588164
0.000645999	0.0587964
0.000646999	0.0587713
0.000647999	0.0587462
0.000648999	0.0587161
0.000649999	0.058676
0.000650999	0.0586459
0.000651999	0.0585807
0.000652999	0.0585004
0.000653999	0.0584553
0.000654999	0.0584302
0.000655999	0.0583901
0.000656999	0.0583299
0.000657999	0.0582547
0.000658999	0.0581744
0.000659999	0.0580992
0.000660999	0.058039
0.000661999	0.0579888
0.000662999	0.0579136
0.000663999	0.0578584
0.000664999	0.0578383
0.000665999	0.0578083
0.000666999	0.0577681
0.000667999	0.057738
0.000668999	0.0577029
0.000669999	0.0576427
0.000670999	0.0575976
0.000671999	0.0575524
0.000672999	0.0574973
0.000673999	0.0574672
0.000674999	0.0574371
0.000675999	0.0573819
0.000676999	0.0573368
0.000677999	0.0573117
0.000678999	0.0572716
0.000679999	0.0572415
0.000680999	0.0572114
0.000681999	0.0571712
0.000682999	0.0571361
0.000683999	0.057096
0.000684999	0.0570659
0.000685999	0.0570258
0.000686999	0.0569756
0.000687999	0.0569305
0.000688999	0.0568903
0.000689999	0.0568703
0.000690999	0.0568502
0.000691999	0.0568201
0.000692999	0.05678
0.000693999	0.0567298
0.000694999	0.0566947
0.000695999	0.0566646
0.000696999	0.0566395
0.000697999	0.0566245
0.000698999	0.0565994
0.000699999	0.0565643
0.000701999	0.0565342
0.000702999	0.0565091
0.000703999	0.056479
0.000704999	0.0564138
0.000705999	0.0563486
0.000706999	0.0563135
0.000707999	0.0562784
0.000708999	0.0562433
0.000709999	0.0562182
0.000710999	0.0561981
0.000711999	0.0561731
0.000712999	0.056138
0.000713999	0.0561028
0.000714999	0.0560828
0.000715999	0.0560627
0.000716999	0.0560226
0.000717999	0.0559875
0.000718999	0.0559624
0.000719999	0.0558972
0.000720999	0.055842
0.000721999	0.0558119
0.000722999	0.0557567
0.000723999	0.0556966
0.000724999	0.0556414
0.000725999	0.0555862
0.000726999	0.0555461
0.000727999	0.055506
0.000728999	0.0554708
0.000729999	0.0554407
0.000730999	0.0554006
0.000731999	0.0553505
0.000732999	0.0553103
0.000733999	0.0552853
0.000734999	0.0552552
0.000735999	0.0552301
0.000736999	0.0552
0.000737999	0.0551649
0.000738999	0.0551398
0.000739999	0.0551097
0.000740999	0.0550746
0.000741999	0.0550495
0.000742999	0.0550345
0.000743999	0.0550194
0.000744999	0.0549943
0.000745999	0.0549442
0.000746999	0.054899
0.000747999	0.0548689
0.000748999	0.0548288
0.000749999	0.0547686
0.000750999	0.0547185
0.000751999	0.0546934
0.000752999	0.0546633
0.000753999	0.0546282
0.000754999	0.0545931
0.000755999	0.054563
0.000756999	0.0545178
0.000757999	0.0544677
0.000758999	0.0544326
0.000759999	0.0543974
0.000760999	0.0543573
0.000762999	0.0543122
0.000763999	0.054257
0.000764999	0.0542018
0.000765999	0.0541567
0.000766999	0.0541165
0.000767999	0.0540564
0.000768999	0.0540062
0.000769999	0.0539661
0.000770999	0.0539159
0.000771999	0.0538658
0.000772999	0.0538156
0.000773999	0.0537604
0.000775999	0.0537203
0.000776999	0.0537002
0.000777999	0.0536802
0.000778999	0.0536501
0.000779999	0.0535999
0.000780999	0.0535698
0.000781999	0.0535498
0.000782999	0.0535197
0.000783999	0.0534896
0.000784999	0.0534494
0.000785999	0.0534093
0.000787999	0.0533892
0.000788999	0.0533742
0.000789999	0.0533541
0.000790999	0.0533391
0.000791999	0.053314
0.000792999	0.0532789
0.000793999	0.0532488
0.000794999	0.0532137
0.000795999	0.0531886
0.000796999	0.0531635
0.000797999	0.0531284
0.000798999	0.0530883
0.000799999	0.0530482
0.000800999	0.0530231
0.000801999	0.052998
0.000803999	0.0529779
0.000804999	0.0529428
0.000805999	0.0528977
0.000806999	0.0528726
0.000807999	0.0528525
0.000808999	0.0528375
0.000809999	0.0528174
0.000810999	0.0527873
0.000811999	0.0527623
0.000812999	0.0527472
0.000813999	0.0527221
0.000814999	0.052687
0.000815999	0.0526569
0.000816999	0.0526218
0.000817999	0.0525817
0.000818999	0.0525466
0.000819999	0.0525165
0.000820999	0.0524964
0.000821999	0.0524864
0.000822999	0.0524764
0.000823999	0.0524663
0.000824999	0.0524412
0.000825999	0.0524111
0.000826999	0.052381
0.000827999	0.052356
0.000828999	0.0523459
0.000829999	0.0523209
0.000830999	0.0522807
0.000831999	0.0522506
0.000832999	0.0522306
0.000833999	0.0522155
0.000834999	0.0522005
0.000836999	0.0521704
0.000837999	0.0521152
0.000838999	0.0520701
0.000839999	0.05204
0.000840999	0.0520149
0.000841999	0.0519748
0.000842999	0.0519196
0.000843999	0.0518744
0.000844999	0.0518443
0.000845999	0.0518293
0.000846999	0.0518042
0.000847999	0.0517591
0.000848999	0.0517139
0.000849999	0.0516889
0.000851999	0.0516437
0.000852999	0.0515885
0.000853999	0.0515534
0.000854999	0.0515133
0.000856999	0.0514732
0.000857999	0.0514431
0.000858999	0.051408
0.000859999	0.0513779
0.000860999	0.0513478
0.000861999	0.0513177
0.000862999	0.0512926
0.000863999	0.0512575
0.000864999	0.0512123
0.000865999	0.0511622
0.000866999	0.0511221
0.000867999	0.051097
0.000868999	0.0510619
0.000869999	0.0510268
0.000870999	0.0510067
0.000871999	0.0509816
0.000872999	0.0509565
0.000873999	0.0509365
0.000874999	0.0509214
0.000875999	0.0509014
0.000876999	0.0508713
0.000877999	0.0508462
0.000878999	0.0508311
0.000879999	0.0508111
0.000880999	0.050791
0.000881999	0.050776
0.000883999	0.0507459
0.000884999	0.0507057
0.000885999	0.0506807
0.000886999	0.0506706
0.000887999	0.0506506
0.000888999	0.0506255
0.000889999	0.0506104
0.000890999	0.0505904
0.000891999	0.0505603
0.000892999	0.0505302
0.000893999	0.0505101
0.000894999	0.0505001
0.000895999	0.050485
0.000896999	0.050465
0.000897999	0.0504399
0.000898999	0.0504148
0.000899999	0.0503897
0.000900999	0.0503596
0.000901999	0.0503245
0.000902999	0.0502894
0.000903999	0.0502694
0.000904999	0.0502393
0.000905999	0.0501991
0.000906999	0.0501791
0.000908999	0.050169
0.000909999	0.050144
0.000910999	0.0500888
0.000911999	0.0500487
0.000913999	0.0500286
0.000914999	0.0499985
0.000915999	0.0499684
0.000916999	0.0499283
0.000917999	0.0498731
0.000918999	0.0498179
0.000919999	0.0497778
0.000920999	0.0497577
0.000921999	0.0497477
0.000922999	0.0497377
0.000923999	0.0497176
0.000924999	0.0496825
0.000925999	0.0496574
0.000926999	0.0496424
0.000927999	0.0496173
0.000928999	0.0495922
0.000929999	0.0495721
0.000930999	0.049537
0.000931999	0.0494919
0.000932999	0.0494568
0.000933999	0.0494267
0.000934999	0.0494016
0.000935999	0.0493715
0.000936999	0.0493414
0.000938999	0.0493113
0.000940999	0.0492862
0.000941999	0.0492662
0.000942999	0.0492361
0.000943999	0.049216
0.000944999	0.049201
0.000945999	0.0491809
0.000947999	0.0491558
0.000948999	0.0491257
0.000949999	0.0490806
0.000950999	0.0490455
0.000951999	0.0490254
0.000952999	0.0490003
0.000953999	0.0489803
0.000954999	0.0489602
0.000955999	0.0489401
0.000956999	0.0489151
0.000957999	0.04889
0.000959999	0.0488599
0.000960999	0.0488348
0.000961999	0.0488097
0.000962999	0.0487696
0.000963999	0.0487445
0.000964999	0.0487345
0.000965999	0.0487194
0.000966999	0.0486944
0.000967999	0.0486643
0.000968999	0.0486442
0.000969999	0.0486191
0.000970999	0.048594
0.000971999	0.048584
0.000972999	0.048574
0.000973999	0.0485489
0.000974999	0.0485188
0.000975999	0.0484987
0.000976999	0.0484787
0.000978999	0.0484586
0.000979999	0.0484386
0.000980999	0.0484185
0.000982999	0.0483884
0.000983999	0.0483583
0.000984999	0.0483432
0.000985999	0.0483282
0.000986999	0.0483081
0.000987999	0.048268
0.000988999	0.0482279
0.000989999	0.0481978
0.000990999	0.0481677
0.000991999	0.0481426
0.000992999	0.0480874
0.000993999	0.0480272
0.000995999	0.0479972
0.000996999	0.0479721
0.000997999	0.047952
0.000998999	0.0479319
0.000999999	0.0479119
0.001001	0.0478968
0.001002	0.0478768
0.001003	0.0478567
0.001004	0.0478316
0.001005	0.0478116
0.001007	0.0477965
0.001008	0.0477614
0.00101	0.0477263
0.001011	0.0477012
0.001012	0.0476661
0.001013	0.047631
0.001014	0.0475959
0.001015	0.0475608
0.001017	0.0475357
0.001019	0.0475106
0.00102	0.0474805
0.001021	0.0474554
0.001022	0.0474354
0.001023	0.0474103
0.001024	0.0473702
0.001025	0.0473401
0.001026	0.04733
0.001027	0.04731
0.001028	0.0472749
0.001029	0.0472448
0.00103	0.0472197
0.001031	0.0471846
0.001032	0.0471394
0.001033	0.0471043
0.001034	0.0470843
0.001036	0.0470642
0.001037	0.0470391
0.001038	0.0470191
0.00104	0.047004
0.001041	0.0469789
0.001042	0.0469589
0.001043	0.0469388
0.001044	0.0469187
0.001045	0.0469087
0.001047	0.0468736
0.001048	0.0468385
0.001049	0.0468134
0.00105	0.0467783
0.001051	0.0467482
0.001052	0.0467231
0.001053	0.0467081
0.001054	0.046693
0.001055	0.0466629
0.001056	0.0466278
0.001057	0.0466027
0.001058	0.0465827
0.001059	0.0465626
0.00106	0.0465325
0.001061	0.0464924
0.001062	0.0464573
0.001063	0.0464372
0.001064	0.0464071
0.001066	0.046377
0.001067	0.046367
0.001068	0.0463469
0.001069	0.0463269
0.00107	0.0463018
0.001071	0.0462717
0.001072	0.0462516
0.001073	0.0462366
0.001074	0.0462265
0.001075	0.0462015
0.001076	0.0461764
0.001077	0.0461613
0.001078	0.0461312
0.001079	0.0461011
0.001081	0.0460861
0.001082	0.046066
0.001083	0.0460409
0.001084	0.0460109
0.001085	0.0459707
0.001087	0.0459456
0.001089	0.0459256
0.00109	0.0459005
0.001091	0.0458855
0.001094	0.0458704
0.001095	0.0458554
0.001096	0.0458453
0.001097	0.0458353
0.001098	0.0458102
0.0011	0.0457851
0.001101	0.0457651
0.001103	0.045745
0.001104	0.0457099
0.001105	0.0456698
0.001106	0.0456547
0.001107	0.0456246
0.001108	0.0455845
0.001111	0.0455594
0.001112	0.0455394
0.001114	0.0455243
0.001115	0.0455093
0.001116	0.0454842
0.001117	0.0454641
0.001119	0.0454441
0.001121	0.045414
0.001122	0.0453839
0.001123	0.0453488
0.001124	0.0453187
0.001125	0.0453036
0.001126	0.0452936
0.001127	0.0452785
0.001128	0.0452585
0.00113	0.0452384
0.001133	0.0452133
0.001134	0.0451933
0.001135	0.0451832
0.001136	0.0451531
0.001137	0.045118
0.001138	0.045103
0.00114	0.0450829
0.001142	0.0450528
0.001143	0.0450227
0.001144	0.0450027
0.001145	0.0449926
0.001146	0.0449776
0.001147	0.0449475
0.001148	0.0449174
0.001149	0.0448973
0.00115	0.0448773
0.001151	0.0448622
0.001152	0.0448472
0.001153	0.0448221
0.001154	0.0447719
0.001155	0.0447268
0.001156	0.0447067
0.001157	0.0446917
0.001158	0.0446816
0.001159	0.0446666
0.00116	0.0446465
0.001162	0.0446265
0.001163	0.0446114
0.001164	0.0445964
0.001165	0.0445763
0.001166	0.0445613
0.001167	0.0445412
0.001168	0.0445061
0.00117	0.044481
0.001171	0.044471
0.001172	0.0444509
0.001173	0.0444258
0.001174	0.0444058
0.001175	0.0443807
0.001176	0.0443506
0.001178	0.0443205
0.001179	0.0443004
0.00118	0.0442854
0.001181	0.0442703
0.001182	0.0442503
0.001183	0.0442101
0.001184	0.04417
0.001185	0.04415
0.001186	0.0441399
0.001187	0.0441299
0.001188	0.0441199
0.001189	0.0441048
0.00119	0.0440797
0.001191	0.0440547
0.001192	0.0440346
0.001194	0.0440045
0.001195	0.0439794
0.001196	0.0439644
0.001197	0.0439493
0.001198	0.0439242
0.001199	0.0438992
0.0012	0.0438741
0.001201	0.043849
0.001202	0.043839
0.001203	0.0438239
0.001204	0.0437938
0.001205	0.0437687
0.001206	0.0437487
0.001207	0.0437286
0.001208	0.0437136
0.001209	0.0436985
0.00121	0.0436885
0.001212	0.0436785
0.001213	0.0436534
0.001214	0.0436133
0.001216	0.0435882
0.001218	0.0435781
0.001219	0.043548
0.001221	0.0435079
0.001222	0.0434778
0.001223	0.0434578
0.001224	0.0434477
0.001225	0.0434377
0.001226	0.0433976
0.001227	0.0433524
0.001228	0.0433374
0.001229	0.0433123
0.00123	0.0432822
0.001231	0.0432571
0.001232	0.043222
0.001233	0.0431969
0.001234	0.0431869
0.001235	0.0431618
0.001236	0.0431367
0.001237	0.0431267
0.001238	0.0431117
0.00124	0.0430916
0.001241	0.0430715
0.001242	0.0430515
0.001243	0.0430264
0.001244	0.0430063
0.001245	0.0429913
0.001246	0.0429662
0.001247	0.0429311
0.001248	0.042891
0.001249	0.0428609
0.00125	0.0428408
0.001251	0.0428258
0.001252	0.0428157
0.001253	0.0428007
0.001254	0.0427756
0.001257	0.0427505
0.001258	0.0427355
0.001259	0.0427154
0.00126	0.0426953
0.001262	0.0426853
0.001263	0.0426753
0.001264	0.0426602
0.001265	0.0426452
0.001266	0.0426352
0.001267	0.0426251
0.001268	0.0426151
0.001269	0.0426051
0.00127	0.042595
0.001271	0.042575
0.001272	0.0425499
0.001273	0.0425348
0.001275	0.0425148
0.001277	0.0424847
0.001279	0.0424496
0.00128	0.0424245
0.001281	0.0424145
0.001282	0.0423944
0.001283	0.0423743
0.001284	0.0423643
0.001286	0.0423543
0.001287	0.0423242
0.001288	0.042284
0.00129	0.0422539
0.001291	0.0422238
0.001292	0.0421988
0.001293	0.0421737
0.001294	0.0421486
0.001295	0.0421285
0.001296	0.0421085
0.001297	0.0420784
0.001298	0.0420533
0.001299	0.0420433
0.0013	0.0420332
0.001301	0.0420182
0.001303	0.0419981
0.001304	0.0419831
0.001305	0.041968
0.001306	0.0419379
0.00131	0.0419129
0.001311	0.0418878
0.001312	0.0418577
0.001315	0.0418426
0.001316	0.0418326
0.001318	0.0418226
0.001319	0.0418125
0.00132	0.0417975
0.001321	0.0417774
0.001322	0.0417574
0.001324	0.0417373
0.001325	0.0417122
0.001326	0.0416871
0.001328	0.0416671
0.001329	0.041652
0.00133	0.041642
0.001331	0.0416169
0.001332	0.0415868
0.001333	0.0415718
0.001334	0.0415567
0.001335	0.0415367
0.001337	0.0415216
0.001338	0.0415066
0.001339	0.0414765
0.00134	0.0414414
0.001341	0.0414063
0.001342	0.0413561
0.001344	0.041316
0.001345	0.0413009
0.001346	0.0412909
0.001347	0.0412809
0.001348	0.0412658
0.001349	0.0412508
0.00135	0.0412407
0.001351	0.0412257
0.001352	0.0412056
0.001353	0.0411906
0.001354	0.0411705
0.001355	0.0411504
0.001356	0.0411304
0.001358	0.0410953
0.00136	0.0410652
0.001361	0.0410501
0.001364	0.0410401
0.001365	0.041025
0.001366	0.04101
0.00137	0.040995
0.001371	0.0409799
0.001372	0.0409649
0.001373	0.0409448
0.001374	0.0409247
0.001375	0.0409097
0.001376	0.0408846
0.001377	0.0408595
0.00138	0.0408495
0.001381	0.0408344
0.001382	0.0408144
0.001384	0.0407893
0.001385	0.0407692
0.001386	0.0407542
0.001387	0.0407391
0.001388	0.0407291
0.001389	0.040709
0.001392	0.040684
0.001393	0.0406589
0.001394	0.0406338
0.001395	0.0406188
0.001396	0.0406087
0.001397	0.0405937
0.001398	0.0405786
0.001399	0.0405536
0.0014	0.0405235
0.001401	0.0404984
0.001402	0.0404683
0.001403	0.0404432
0.001404	0.0404231
0.001405	0.0404031
0.001406	0.040388
0.001407	0.040373
0.001408	0.0403579
0.001409	0.0403429
0.00141	0.0403278
0.001411	0.0403178
0.001413	0.0403028
0.001414	0.0402877
0.001415	0.0402777
0.001416	0.0402526
0.001418	0.0402225
0.001419	0.0402075
0.00142	0.0401974
0.001421	0.0401874
0.001424	0.0401573
0.001425	0.0401272
0.001426	0.0401122
0.001427	0.0400921
0.001428	0.040077
0.001429	0.040067
0.001431	0.040052
0.001432	0.0400319
0.001433	0.0400118
0.001434	0.0399968
0.001436	0.0399667
0.001438	0.0399366
0.00144	0.0399266
0.001441	0.0399165
0.001444	0.0399015
0.001445	0.0398864
0.001446	0.0398714
0.001448	0.0398563
0.001449	0.0398463
0.001453	0.0398262
0.001454	0.0398062
0.001455	0.0397962
0.001456	0.0397861
0.001458	0.0397661
0.001459	0.039741
0.00146	0.0397209
0.001462	0.0397009
0.001463	0.0396808
0.001464	0.0396607
0.001465	0.0396457
0.001467	0.0396356
0.001469	0.0396206
0.00147	0.0396055
0.001471	0.0395905
0.001472	0.0395554
0.001473	0.0395253
0.001475	0.0395153
0.001478	0.0394852
0.001479	0.0394551
0.00148	0.039435
0.001483	0.0394149
0.001484	0.0393999
0.001485	0.0393798
0.001486	0.0393548
0.001488	0.0393347
0.00149	0.0393247
0.001491	0.0393146
0.001493	0.0393046
0.001494	0.0392946
0.001496	0.0392795
0.001499	0.0392645
0.0015	0.0392444
0.001502	0.0392143
0.001503	0.0391842
0.001504	0.0391642
0.001506	0.0391491
0.001508	0.0391341
0.00151	0.039124
0.001511	0.039114
0.001512	0.039104
0.001513	0.0390889
0.001515	0.0390688
0.00152	0.0390488
0.001521	0.0390187
0.001522	0.0389936
0.001523	0.0389836
0.001524	0.0389735
0.001526	0.0389635
0.001527	0.0389535
0.001528	0.0389334
0.001529	0.0389033
0.00153	0.0388682
0.001531	0.0388431
0.001532	0.0388331
0.001533	0.0388231
0.001534	0.038803
0.001537	0.0387779
0.001538	0.0387629
0.00154	0.0387328
0.001541	0.0386977
0.001543	0.0386676
0.001545	0.0386425
0.001546	0.0386274
0.001549	0.0386124
0.001551	0.0385923
0.001552	0.0385723
0.001553	0.0385622
0.001554	0.0385522
0.001556	0.0385422
0.001559	0.0385271
0.00156	0.0385121
0.001561	0.0385021
0.001563	0.038492
0.001564	0.038482
0.001565	0.038472
0.001566	0.0384619
0.001568	0.0384419
0.001569	0.0384218
0.00157	0.0384017
0.001571	0.0383767
0.001574	0.0383516
0.001576	0.0383265
0.001581	0.0383064
0.001582	0.0382864
0.001586	0.0382713
0.001587	0.0382462
0.001589	0.0382212
0.00159	0.0382061
0.001592	0.0381911
0.001594	0.038181
0.001596	0.038166
0.001598	0.0381459
0.001599	0.0381309
0.0016	0.0381158
0.001601	0.0380857
0.001602	0.0380607
0.001603	0.0380506
0.001604	0.0380356
0.001605	0.0380155
0.001606	0.0380005
0.001608	0.0379904
0.001609	0.0379804
0.00161	0.0379654
0.001612	0.0379503
0.001614	0.0379403
0.001615	0.0379302
0.001617	0.0379052
0.001618	0.0378801
0.001619	0.03787
0.00162	0.03786
0.001623	0.03784
0.001625	0.0378199
0.001627	0.0378048
0.001628	0.0377898
0.00163	0.0377798
0.001631	0.0377697
0.001632	0.0377597
0.001634	0.0377396
0.001635	0.0377196
0.001637	0.0377095
0.001638	0.0376995
0.001639	0.0376845
0.00164	0.0376694
0.001642	0.0376594
0.001643	0.0376493
0.001646	0.0376293
0.001647	0.0376092
0.001648	0.0375992
0.00165	0.0375841
0.001651	0.0375691
0.001652	0.037554
0.001653	0.037529
0.001657	0.0375039
0.001658	0.0374838
0.001659	0.0374638
0.00166	0.0374487
0.001661	0.0374286
0.001662	0.0374086
0.001664	0.0373935
0.001665	0.0373785
0.001666	0.0373634
0.001667	0.0373484
0.00167	0.0373384
0.001671	0.0373233
0.001673	0.0373083
0.001674	0.0372932
0.001675	0.0372782
0.001677	0.0372681
0.001678	0.0372531
0.00168	0.037238
0.001681	0.037228
0.001682	0.0372079
0.001683	0.0371879
0.001684	0.0371779
0.001685	0.0371628
0.001686	0.0371478
0.001687	0.0371377
0.001688	0.0371277
0.00169	0.0371177
0.001692	0.0371026
0.001694	0.0370826
0.001696	0.0370575
0.001697	0.0370324
0.001698	0.0370173
0.001699	0.0369973
0.0017	0.0369772
0.001701	0.0369572
0.001703	0.0369371
0.001704	0.036922
0.001707	0.036907
0.001709	0.036897
0.00171	0.0368769
0.001711	0.0368568
0.001714	0.0368468
0.001715	0.0368318
0.001716	0.0368167
0.001717	0.0368017
0.001718	0.0367866
0.001719	0.0367716
0.00172	0.0367515
0.001721	0.0367365
0.001722	0.0367264
0.001723	0.0367164
0.001725	0.0367064
0.001727	0.0366913
0.001729	0.0366662
0.00173	0.0366462
0.001732	0.0366311
0.001733	0.036601
0.001734	0.0365759
0.001735	0.0365609
0.001737	0.0365459
0.001742	0.0365308
0.001744	0.0365158
0.001745	0.0365057
0.001747	0.0364957
0.001748	0.0364857
0.001749	0.0364706
0.00175	0.0364455
0.001752	0.0364255
0.001753	0.0364154
0.001754	0.0363904
0.001756	0.0363603
0.001757	0.0363452
0.001759	0.0363352
0.00176	0.0363201
0.001761	0.0363051
0.001762	0.03629
0.001763	0.036265
0.001764	0.0362449
0.001765	0.0362349
0.001766	0.0362248
0.001767	0.0362148
0.001768	0.0362048
0.001769	0.0361847
0.00177	0.0361646
0.001773	0.0361546
0.001775	0.0361446
0.001776	0.0361345
0.001777	0.0361245
0.001782	0.0361145
0.001783	0.0361045
0.001784	0.0360944
0.001786	0.0360844
0.00179	0.0360744
0.001794	0.0360643
0.001795	0.0360392
0.001797	0.0360041
0.001799	0.035974
0.001802	0.035954
0.001806	0.0359439
0.001807	0.0359289
0.001808	0.0359138
0.001809	0.0358988
0.001814	0.0358838
0.001817	0.0358737
0.001818	0.0358537
0.00182	0.0358336
0.001821	0.0358185
0.001822	0.0357985
0.001825	0.0357784
0.001826	0.0357634
0.001827	0.0357533
0.001829	0.0357433
0.001831	0.0357283
0.001832	0.0357132
0.001833	0.0356982
0.001834	0.0356831
0.001835	0.0356681
0.001838	0.035633
0.001839	0.0356029
0.00184	0.0355928
0.001841	0.0355728
0.001842	0.0355527
0.001843	0.0355427
0.001844	0.0355326
0.001846	0.0355126
0.001847	0.0354925
0.001849	0.0354825
0.00185	0.0354724
0.001851	0.0354624
0.001852	0.0354424
0.001853	0.0354123
0.001854	0.0353922
0.001855	0.0353822
0.001857	0.0353721
0.001859	0.0353621
0.001861	0.0353471
0.001862	0.035332
0.001863	0.035322
0.001864	0.0353119
0.001865	0.0353019
0.001866	0.0352818
0.001867	0.0352618
0.001869	0.0352517
0.00187	0.0352417
0.001871	0.0352267
0.001872	0.0352066
0.001873	0.0351916
0.001874	0.0351815
0.001875	0.0351715
0.001877	0.0351615
0.001878	0.0351514
0.001879	0.0351414
0.00188	0.0351314
0.001881	0.0351213
0.001883	0.0351113
0.001884	0.0351013
0.001886	0.0350912
0.001887	0.0350812
0.001888	0.0350712
0.00189	0.0350611
0.001892	0.0350461
0.001893	0.035021
0.001895	0.0349909
0.001896	0.0349709
0.001897	0.0349608
0.001898	0.0349508
0.0019	0.0349357
0.001903	0.0349207
0.001904	0.0349057
0.001905	0.0348856
0.001906	0.0348705
0.001908	0.0348555
0.00191	0.0348354
0.001913	0.0348154
0.001914	0.0348003
0.001918	0.0347903
0.001919	0.0347752
0.00192	0.0347552
0.001921	0.0347401
0.001924	0.0347301
0.001925	0.0347201
0.001926	0.03471
0.001929	0.0347
0.001932	0.03469
0.001935	0.0346799
0.001936	0.0346699
0.001937	0.0346599
0.00194	0.0346448
0.001943	0.0346298
0.001946	0.0346197
0.001947	0.0346047
0.001949	0.0345896
0.00195	0.0345796
0.001951	0.0345696
0.001956	0.0345596
0.001957	0.0345495
0.001959	0.0345395
0.001965	0.0345295
0.001967	0.0345194
0.001969	0.0345094
0.00197	0.0344994
0.001974	0.0344893
0.001977	0.0344793
0.001978	0.0344693
0.001983	0.0344592
0.001984	0.0344492
0.001986	0.0344342
0.001987	0.0344191
0.001989	0.034399
0.00199	0.034379
0.001991	0.0343689
0.001992	0.0343589
0.001994	0.0343489
0.001996	0.0343389
0.001997	0.0343288
0.001998	0.0343138
0.001999	0.0342987
0.002	0.0342887
0.002001	0.0342736
0.002002	0.0342586
0.002003	0.0342486
0.002006	0.0342385
0.002008	0.0342235
0.002009	0.0342084
0.00201	0.0341934
0.002011	0.0341733
0.002012	0.0341533
0.002013	0.0341332
0.002017	0.0341182
0.00202	0.0341081
0.002024	0.0340981
0.002025	0.0340881
0.002026	0.034068
0.002027	0.0340479
0.002034	0.0340379
0.002035	0.0340279
0.002036	0.0340128
0.002037	0.0339978
0.002041	0.0339877
0.002042	0.0339777
0.002043	0.0339677
0.002044	0.0339576
0.002045	0.0339476
0.002049	0.0339376
0.00205	0.0339276
0.002051	0.0339125
0.002052	0.0338975
0.002054	0.0338874
0.002055	0.0338774
0.002057	0.0338674
0.002058	0.0338523
0.002059	0.0338373
0.00206	0.0338272
0.002061	0.0338122
0.002062	0.0337971
0.002063	0.0337871
0.002064	0.0337721
0.002066	0.033757
0.002067	0.033747
0.002068	0.0337319
0.002069	0.0337169
0.002071	0.0337018
0.002073	0.0336868
0.002074	0.0336768
0.002075	0.0336667
0.002077	0.0336567
0.002078	0.0336467
0.002079	0.0336366
0.00208	0.0336266
0.002081	0.0336115
0.002082	0.0335965
0.002084	0.0335815
0.002085	0.0335614
0.002088	0.0335463
0.00209	0.0335363
0.002091	0.0335263
0.002092	0.0335162
0.002093	0.0335062
0.002094	0.0334912
0.002098	0.0334711
0.0021	0.0334561
0.002103	0.033436
0.002106	0.0334159
0.002107	0.0334009
0.002111	0.0333858
0.002112	0.0333758
0.002113	0.0333658
0.002114	0.0333507
0.002117	0.0333357
0.00212	0.0333206
0.002124	0.0333056
0.002125	0.0332905
0.002126	0.0332705
0.002128	0.0332554
0.002129	0.0332454
0.002132	0.0332354
0.002133	0.0332253
0.002134	0.0332002
0.002136	0.0331752
0.002138	0.0331601
0.002139	0.033135
0.002143	0.033115
0.002144	0.0331049
0.002145	0.0330949
0.002147	0.0330849
0.002149	0.0330748
0.002151	0.0330648
0.002154	0.0330448
0.002156	0.0330197
0.002158	0.0329996
0.002159	0.0329795
0.002161	0.0329595
0.002162	0.0329394
0.002166	0.0329244
0.002168	0.0329143
0.002169	0.0329043
0.002171	0.0328893
0.002172	0.0328742
0.002174	0.0328541
0.002176	0.0328291
0.002177	0.032809
0.00218	0.0327889
0.002182	0.0327739
0.002184	0.0327588
0.002187	0.0327388
0.002188	0.0327187
0.002189	0.0327037
0.00219	0.0326886
0.002192	0.0326736
0.002194	0.0326635
0.002197	0.0326535
0.002198	0.0326435
0.0022	0.0326334
0.002201	0.0326234
0.002202	0.0326084
0.002203	0.0325883
0.002206	0.0325682
0.002207	0.0325482
0.002209	0.0325331
0.002213	0.0325181
0.002214	0.032503
0.002216	0.032493
0.002217	0.032478
0.002218	0.0324629
0.002219	0.0324529
0.00222	0.0324428
0.002221	0.0324328
0.002222	0.0324228
0.002224	0.0324127
0.002228	0.0323977
0.002229	0.0323827
0.002233	0.0323726
0.002234	0.0323626
0.002236	0.0323526
0.002237	0.0323425
0.002238	0.0323325
0.00224	0.0323174
0.002242	0.0323024
0.002243	0.0322924
0.002245	0.0322773
0.002248	0.0322623
0.00225	0.0322522
0.002255	0.0322422
0.002256	0.0322322
0.002258	0.0322071
0.002265	0.032177
0.002267	0.032162
0.002268	0.0321519
0.002269	0.0321419
0.00227	0.0321319
0.002271	0.0321218
0.002272	0.0321118
0.002278	0.0321018
0.00228	0.0320867
0.002283	0.0320717
0.002284	0.0320616
0.002285	0.0320466
0.002286	0.0320315
0.002288	0.0320165
0.002289	0.0320014
0.00229	0.0319914
0.002297	0.0319764
0.002298	0.0319613
0.0023	0.0319463
0.002302	0.0319262
0.002308	0.0319112
0.002309	0.0318961
0.00231	0.0318811
0.00232	0.031866
0.002323	0.031851
0.002329	0.0318359
0.002331	0.0318159
0.002332	0.0318008
0.002335	0.0317908
0.002337	0.0317807
0.002338	0.0317707
0.002339	0.0317607
0.00234	0.0317506
0.002344	0.0317406
0.002348	0.0317306
0.002351	0.0317206
0.002352	0.0317055
0.002353	0.0316854
0.002358	0.0316704
0.00236	0.0316604
0.002363	0.0316503
0.002365	0.0316403
0.002366	0.0316253
0.002367	0.0316102
0.002369	0.0316002
0.00237	0.0315851
0.002371	0.0315701
0.002372	0.031555
0.002374	0.031535
0.002375	0.0315199
0.002382	0.0315099
0.002388	0.0314948
0.00239	0.0314798
0.002391	0.0314698
0.002392	0.0314547
0.002393	0.0314397
0.002394	0.0314296
0.002395	0.0314146
0.002397	0.0313995
0.002398	0.0313895
0.002401	0.0313795
0.002406	0.0313694
0.002407	0.0313544
0.002408	0.0313393
0.002411	0.0313193
0.002414	0.0312992
0.002416	0.0312892
0.002418	0.0312741
0.002426	0.0312591
0.002427	0.0312491
0.002428	0.031239
0.00243	0.031229
0.002434	0.0312139
0.002435	0.0311989
0.002436	0.0311889
0.002437	0.0311738
0.002441	0.0311588
0.002442	0.0311487
0.002444	0.0311337
0.002446	0.0311186
0.002447	0.0311036
0.002448	0.0310886
0.002449	0.0310785
0.00245	0.0310635
0.002451	0.0310484
0.002452	0.0310384
0.002453	0.0310233
0.002454	0.0309983
0.002457	0.0309782
0.002459	0.0309632
0.00246	0.0309481
0.002462	0.0309381
0.002463	0.030928
0.002465	0.030913
0.002469	0.0308929
0.00247	0.0308779
0.002477	0.0308628
0.002478	0.0308428
0.00248	0.0308277
0.002482	0.0308127
0.002484	0.0307976
0.002485	0.0307876
0.002488	0.0307776
0.00249	0.0307675
0.002491	0.0307525
0.002493	0.0307374
0.002497	0.0307224
0.002501	0.0307023
0.002502	0.0306873
0.002503	0.0306672
0.002504	0.0306472
0.002505	0.0306371
0.002506	0.0306271
0.002507	0.0306171
0.002508	0.030607
0.002509	0.030597
0.00251	0.0305819
0.002517	0.0305619
0.002519	0.0305468
0.00252	0.0305368
0.002523	0.0305268
0.002524	0.0305117
0.002525	0.0304967
0.002526	0.0304816
0.002528	0.0304666
0.002531	0.0304565
0.002533	0.0304465
0.002534	0.0304365
0.002536	0.0304265
0.002538	0.0304164
0.002539	0.0304014
0.002544	0.0303863
0.002545	0.0303763
0.002548	0.0303663
0.002549	0.0303462
0.00255	0.0303261
0.002553	0.0303161
0.002554	0.030296
0.002555	0.030276
0.002556	0.0302659
0.002557	0.0302509
0.002559	0.0302358
0.00256	0.0302258
0.002563	0.0302158
0.002566	0.0302058
0.002569	0.0301907
0.00257	0.0301757
[truncated: 2,789 more rows]

## Sheet: s=-0.05
0	0.994357
9.99999e-07	0.850772
2e-06	0.657733
3e-06	0.567238
4e-06	0.50859
5e-06	0.467725
5.99999e-06	0.436386
6.99999e-06	0.411614
7.99999e-06	0.391348
8.99999e-06	0.37389
9.99999e-06	0.358839
1.1e-05	0.345892
1.2e-05	0.33433
1.3e-05	0.324115
1.4e-05	0.314887
1.5e-05	0.306342
1.6e-05	0.29879
1.7e-05	0.292019
1.8e-05	0.285578
1.9e-05	0.279476
2e-05	0.273922
2.1e-05	0.268693
2.2e-05	0.263762
2.3e-05	0.259191
2.4e-05	0.254878
2.5e-05	0.25072
2.6e-05	0.246707
2.7e-05	0.243098
2.8e-05	0.239608
2.9e-05	0.236258
3e-05	0.233172
3.1e-05	0.230051
3.2e-05	0.227045
3.3e-05	0.224223
3.4e-05	0.221401
3.5e-05	0.218909
3.6e-05	0.216506
3.7e-05	0.213973
3.8e-05	0.21172
3.9e-05	0.209536
4e-05	0.207273
4.1e-05	0.205264
4.2e-05	0.20312
4.3e-05	0.201086
4.4e-05	0.199376
4.5e-05	0.197551
4.6e-05	0.195766
4.7e-05	0.194196
4.8e-05	0.192596
4.9e-05	0.191055
5e-05	0.189575
5.09999e-05	0.187999
5.19999e-05	0.186558
5.29999e-05	0.185207
5.39999e-05	0.183811
5.49999e-05	0.18245
5.59999e-05	0.181104
5.69999e-05	0.179798
5.79999e-05	0.178582
5.89999e-05	0.17733
5.99999e-05	0.176004
6.09999e-05	0.174683
6.19999e-05	0.173532
6.29999e-05	0.172435
6.39999e-05	0.171333
6.49999e-05	0.170381
6.59999e-05	0.169409
6.69999e-05	0.168347
6.79999e-05	0.16726
6.89999e-05	0.166188
6.99999e-05	0.165251
7.09999e-05	0.164363
7.19999e-05	0.163406
7.29999e-05	0.162429
7.39999e-05	0.161552
7.49999e-05	0.160739
7.59999e-05	0.159926
7.69999e-05	0.159124
7.79999e-05	0.158391
7.89999e-05	0.157663
7.99999e-05	0.15685
8.09999e-05	0.156083
8.19999e-05	0.15538
8.29999e-05	0.154637
8.39999e-05	0.153929
8.49999e-05	0.153261
8.59999e-05	0.152543
8.69999e-05	0.151755
8.79999e-05	0.151018
8.89999e-05	0.150369
8.99999e-05	0.149696
9.09999e-05	0.149008
9.19999e-05	0.14836
9.29999e-05	0.147712
9.39999e-05	0.147069
9.49999e-05	0.146401
9.59999e-05	0.145788
9.69999e-05	0.14522
9.79999e-05	0.144581
9.89999e-05	0.143988
9.99999e-05	0.143455
0.000101	0.142926
0.000102	0.142318
0.000103	0.141705
0.000104	0.141107
0.000105	0.140538
0.000106	0.139995
0.000107	0.139327
0.000108	0.138654
0.000109	0.138065
0.00011	0.137547
0.000111	0.137048
0.000112	0.13655
0.000113	0.136051
0.000114	0.135528
0.000115	0.135074
0.000116	0.134626
0.000117	0.134142
0.000118	0.133703
0.000119	0.133314
0.00012	0.13295
0.000121	0.132547
0.000122	0.132063
0.000123	0.13155
0.000124	0.131086
0.000125	0.130662
0.000126	0.130248
0.000127	0.12986
0.000128	0.129466
0.000129	0.129027
0.00013	0.128628
0.000131	0.128234
0.000132	0.127771
0.000133	0.127347
0.000134	0.126978
0.000135	0.126589
0.000136	0.126195
0.000137	0.125836
0.000138	0.125423
0.000139	0.125054
0.00014	0.124759
0.000141	0.124415
0.000142	0.124081
0.000143	0.123688
0.000144	0.123259
0.000145	0.122915
0.000146	0.122551
0.000147	0.122187
0.000148	0.121853
0.000149	0.121509
0.00015	0.12116
0.000151	0.120791
0.000152	0.120422
0.000153	0.120103
0.000154	0.119829
0.000155	0.11954
0.000156	0.119281
0.000157	0.119011
0.000158	0.118737
0.000159	0.118468
0.00016	0.118149
0.000161	0.11784
0.000162	0.117536
0.000163	0.117222
0.000164	0.116873
0.000165	0.116504
0.000166	0.116205
0.000167	0.115925
0.000168	0.115596
0.000169	0.115267
0.00017	0.114953
0.000171	0.114689
0.000172	0.11448
0.000173	0.11422
0.000174	0.113976
0.000175	0.113752
0.000176	0.113497
0.000177	0.113238
0.000178	0.112954
0.000179	0.112715
0.00018	0.112525
0.000181	0.112306
0.000182	0.112097
0.000183	0.111872
0.000184	0.111588
0.000185	0.111289
0.000186	0.11101
0.000187	0.110706
0.000188	0.110421
0.000189	0.110242
0.00019	0.110038
0.000191	0.109788
0.000192	0.109534
0.000193	0.10924
0.000194	0.108971
0.000195	0.108736
0.000196	0.108517
0.000197	0.108293
0.000198	0.108033
0.000199	0.107784
0.0002	0.10755
0.000201	0.107301
0.000202	0.107031
0.000203	0.106802
0.000204	0.106593
0.000205	0.106343
0.000206	0.106079
0.000207	0.105845
0.000208	0.10566
0.000209	0.105506
0.00021	0.105331
0.000211	0.105117
0.000212	0.104923
0.000213	0.104733
0.000214	0.104559
0.000215	0.104379
0.000216	0.104155
0.000217	0.103935
0.000218	0.103721
0.000219	0.103497
0.00022	0.103282
0.000221	0.103088
0.000222	0.102869
0.000223	0.102669
0.000224	0.102465
0.000225	0.102211
0.000226	0.101996
0.000227	0.101822
0.000228	0.101647
0.000229	0.101488
0.00023	0.101328
0.000231	0.101179
0.000232	0.101024
0.000233	0.10081
0.000234	0.100585
0.000235	0.100401
0.000236	0.100231
0.000237	0.100027
0.000238	0.0998175
0.000239	0.0996181
0.00024	0.0994337
0.000241	0.0992642
0.000242	0.0990947
0.000243	0.0989451
0.000244	0.0987756
0.000245	0.0985812
0.000246	0.0983867
0.000247	0.0981973
0.000248	0.0979929
0.000249	0.0978034
0.00025	0.0976439
0.000251	0.0974993
0.000252	0.0973298
0.000253	0.0971304
0.000254	0.0969609
0.000255	0.0968213
0.000256	0.0966917
0.000257	0.0964923
0.000258	0.0962879
0.000259	0.0961433
0.00026	0.0959838
0.000261	0.0958342
0.000262	0.0957295
0.000263	0.0955899
0.000264	0.0953706
0.000265	0.0951612
0.000266	0.0949967
0.000267	0.0948471
0.000268	0.0946826
0.000269	0.0944682
0.00027	0.0942987
0.000271	0.0941442
0.000272	0.0939697
0.000273	0.09384
0.000274	0.0937154
0.000275	0.0935459
0.000276	0.0933714
0.000277	0.0932518
0.000278	0.0931271
0.000279	0.0929676
0.00028	0.092828
0.000281	0.0927283
0.000282	0.0926136
0.000283	0.0924541
0.000284	0.0922896
0.000285	0.092145
0.000286	0.0920154
0.000287	0.0918658
0.000288	0.0917013
0.000289	0.0915916
0.00029	0.0915019
0.000291	0.0913972
0.000292	0.0912576
0.000293	0.091113
0.000294	0.0910034
0.000295	0.0908638
0.000296	0.0907292
0.000297	0.0905796
0.000298	0.09043
0.000299	0.0903104
0.0003	0.0901708
0.000301	0.0900262
0.000302	0.0898966
0.000303	0.089772
0.000304	0.0896473
0.000305	0.0895426
0.000306	0.089433
0.000307	0.0892884
0.000308	0.0891538
0.000309	0.0890092
0.00031	0.0888497
0.000311	0.08873
0.000312	0.0886353
0.000313	0.0885256
0.000314	0.0884159
0.000315	0.0883262
0.000316	0.0882365
0.000317	0.0881517
0.000318	0.088047
0.000319	0.0879124
0.00032	0.0878077
0.000321	0.087718
0.000322	0.0876183
0.000323	0.0875335
0.000324	0.0874238
0.000325	0.0873192
0.000326	0.0872244
0.000327	0.0871197
0.000328	0.087025
0.000329	0.0869303
0.00033	0.0868455
0.000331	0.086696
0.000332	0.0865115
0.000333	0.0863869
0.000334	0.0862772
0.000335	0.0861725
0.000336	0.0860728
0.000337	0.0859881
0.000338	0.0858983
0.000339	0.0857837
0.00034	0.085654
0.000341	0.0855294
0.000342	0.0853898
0.000343	0.0852402
0.000344	0.0851306
0.000345	0.0850259
0.000346	0.0848963
0.000347	0.0847716
0.000348	0.0846769
0.000349	0.0845822
0.00035	0.0844924
0.000351	0.0844027
0.000352	0.084308
0.000353	0.0842133
0.000354	0.0841235
0.000355	0.0840288
0.000356	0.0839241
0.000357	0.0838294
0.000358	0.0837347
0.000359	0.08361
0.00036	0.0834754
0.000361	0.0833707
0.000362	0.0832561
0.000363	0.0831314
0.000364	0.0830018
0.000365	0.0829121
0.000366	0.0828473
0.000367	0.0827575
0.000368	0.0826877
0.000369	0.0826478
0.00037	0.082583
0.000371	0.0824833
0.000372	0.0823836
0.000373	0.0822839
0.000374	0.0821892
0.000375	0.0820646
0.000376	0.0819399
0.000377	0.0818601
0.000378	0.0817804
0.000379	0.0816906
0.00038	0.0816209
0.000381	0.0815411
0.000382	0.0814513
0.000383	0.0813716
0.000384	0.0813068
0.000385	0.081242
0.000386	0.0811622
0.000387	0.0810824
0.000388	0.0809827
0.000389	0.0808681
0.00039	0.0807634
0.000391	0.0807085
0.000392	0.0806637
0.000393	0.0805889
0.000394	0.0804942
0.000395	0.0804044
0.000396	0.0803197
0.000397	0.0802499
0.000398	0.0802
0.000399	0.0801153
0.0004	0.0800455
0.000401	0.0799807
0.000402	0.0798809
0.000403	0.0798161
0.000404	0.0797563
0.000405	0.0796765
0.000406	0.0796117
0.000407	0.0795569
0.000408	0.079507
0.000409	0.0794323
0.00041	0.0793575
0.000411	0.0792877
0.000412	0.079198
0.000413	0.0791032
0.000414	0.0790035
0.000415	0.0788938
0.000416	0.0788041
0.000417	0.0787493
0.000418	0.0786894
0.000419	0.0786097
0.00042	0.078515
0.000421	0.0784252
0.000422	0.0783504
0.000423	0.0782806
0.000424	0.0782059
0.000425	0.0781361
0.000426	0.0780663
0.000427	0.0779865
0.000428	0.0779317
0.000429	0.0778768
0.00043	0.077812
0.000431	0.0777073
0.000432	0.0775677
0.000433	0.0774531
0.000434	0.0773733
0.000435	0.0773234
0.000436	0.0772636
0.000437	0.0771839
0.000438	0.0771091
0.000439	0.0770393
0.00044	0.0769595
0.000441	0.0768748
0.000442	0.07679
0.000443	0.0767003
0.000444	0.0766205
0.000445	0.0765557
0.000446	0.0764909
0.000447	0.076446
0.000448	0.0764061
0.000449	0.0763613
0.00045	0.0762616
0.000451	0.0761569
0.000452	0.0760871
0.000453	0.0760073
0.000454	0.0759275
0.000455	0.0758627
0.000456	0.0758129
0.000457	0.075763
0.000458	0.0757132
0.000459	0.0756733
0.00046	0.0756184
0.000461	0.0755387
0.000462	0.075439
0.000463	0.0753143
0.000464	0.0752146
0.000465	0.0751398
0.000466	0.0750451
0.000467	0.0749454
0.000468	0.0748307
0.000469	0.074731
0.00047	0.0746762
0.000471	0.0746214
0.000472	0.0745615
0.000473	0.0744967
0.000474	0.0744219
0.000475	0.0743472
0.000476	0.0742873
0.000477	0.0742076
0.000478	0.0741029
0.000479	0.0740032
0.00048	0.0739284
0.000481	0.0738736
0.000482	0.0738436
0.000483	0.0738287
0.000484	0.0737888
0.000485	0.073719
0.000486	0.0736592
0.000487	0.0735744
0.000488	0.0734697
0.000489	0.0734149
0.00049	0.073375
0.000491	0.0733252
0.000492	0.0732554
0.000493	0.0731906
0.000494	0.0731507
0.000495	0.0731008
0.000496	0.073036
0.000497	0.0729662
0.000498	0.0729064
0.000499	0.0728715
0.0005	0.0728366
0.000500999	0.0727817
0.000501999	0.0727169
0.000502999	0.0726521
0.000503999	0.0725873
0.000504999	0.0725375
0.000505999	0.0725026
0.000506999	0.0724677
0.000507999	0.0724228
0.000508999	0.0723729
0.000509999	0.0723231
0.000510999	0.0722683
0.000511999	0.0721835
0.000512999	0.0720888
0.000513999	0.0720339
0.000514999	0.0719841
0.000515999	0.0719193
0.000516999	0.0718246
0.000517999	0.0717498
0.000518999	0.0717248
0.000519999	0.071685
0.000520999	0.0716152
0.000521999	0.0715404
0.000522999	0.0714806
0.000523999	0.0714108
0.000524999	0.071346
0.000525999	0.0713061
0.000526999	0.0712512
0.000527999	0.0712014
0.000528999	0.0711316
0.000529999	0.0710468
0.000530999	0.070977
0.000531999	0.0709172
0.000532999	0.0708674
0.000533999	0.0708075
0.000534999	0.0707427
0.000535999	0.0706829
0.000536999	0.070633
0.000537999	0.0705732
0.000538999	0.0705284
0.000539999	0.0705034
0.000540999	0.0704536
0.000541999	0.0703738
0.000542999	0.070309
0.000543999	0.0702741
0.000544999	0.0702342
0.000545999	0.0701893
0.000546999	0.0701594
0.000547999	0.0701146
0.000548999	0.0700547
0.000549999	0.0699949
0.000550999	0.0699251
0.000551999	0.0698603
0.000552999	0.0698154
0.000553999	0.0697756
0.000554999	0.0697207
0.000555999	0.0696659
0.000556999	0.069621
0.000557999	0.0695662
0.000558999	0.0695113
0.000559999	0.0694565
0.000560999	0.0694116
0.000561999	0.0693668
0.000562999	0.0693019
0.000563999	0.0692421
0.000564999	0.0691823
0.000565999	0.0691424
0.000566999	0.0690876
0.000567999	0.0690277
0.000568999	0.0689978
0.000569999	0.0689629
0.000570999	0.0689181
0.000571999	0.0688782
0.000572999	0.0688582
0.000573999	0.0688283
0.000574999	0.0687785
0.000575999	0.0687286
0.000576999	0.0686887
0.000577999	0.0686389
0.000578999	0.0685791
0.000579999	0.0685392
0.000580999	0.0685043
0.000581999	0.0684494
0.000582999	0.0683946
0.000583999	0.0683547
0.000584999	0.0683198
0.000585999	0.06826
0.000586999	0.0681952
0.000587999	0.0681503
0.000588999	0.0680905
0.000589999	0.0680406
0.000590999	0.0679958
0.000591999	0.0679559
0.000592999	0.067916
0.000593999	0.0678562
0.000594999	0.0678113
0.000595999	0.0677664
0.000596999	0.0677116
0.000597999	0.0676468
0.000598999	0.067582
0.000599999	0.0675371
0.000600999	0.0674723
0.000601999	0.0673776
0.000602999	0.0672928
0.000603999	0.067223
0.000604999	0.0671732
0.000605999	0.0671532
0.000606999	0.0671233
0.000607999	0.0670785
0.000608999	0.0670485
0.000609999	0.0669837
0.000610999	0.066909
0.000611999	0.0668741
0.000612999	0.0668441
0.000613999	0.0668192
0.000614999	0.0667793
0.000615999	0.0667195
0.000616999	0.0666697
0.000617999	0.0666198
0.000618999	0.06657
0.000619999	0.0665351
0.000620999	0.0665051
0.000621999	0.0664752
0.000622999	0.0664353
0.000623999	0.0663905
0.000624999	0.0663506
0.000625999	0.0663057
0.000626999	0.0662509
0.000627999	0.0661911
0.000628999	0.0661312
0.000629999	0.0660864
0.000630999	0.0660565
0.000632999	0.0660066
0.000633999	0.0659567
0.000634999	0.0659169
0.000636999	0.065887
0.000637999	0.065872
0.000638999	0.0658271
0.000639999	0.0657823
0.000640999	0.0657573
0.000641999	0.0657274
0.000642999	0.0657025
0.000643999	0.0656676
0.000644999	0.0656327
0.000645999	0.0655878
0.000646999	0.065523
0.000647999	0.0654732
0.000648999	0.0654333
0.000649999	0.0654084
0.000650999	0.0653884
0.000651999	0.0653585
0.000652999	0.0653336
0.000653999	0.0653037
0.000654999	0.0652538
0.000655999	0.065199
0.000656999	0.0651541
0.000657999	0.0651042
0.000658999	0.0650444
0.000660999	0.0649896
0.000661999	0.0649497
0.000662999	0.0649098
0.000663999	0.064855
0.000664999	0.0647952
0.000665999	0.0647553
0.000666999	0.0647204
0.000667999	0.0646805
0.000668999	0.0646556
0.000670999	0.0646256
0.000671999	0.0645758
0.000672999	0.064521
0.000673999	0.0644761
0.000674999	0.0644312
0.000675999	0.0643764
0.000676999	0.0643415
0.000677999	0.0643315
0.000678999	0.0643066
0.000679999	0.0642717
0.000680999	0.0642368
0.000681999	0.0641819
0.000682999	0.0641221
0.000683999	0.0640773
0.000684999	0.0640374
0.000685999	0.0640075
0.000686999	0.0639775
0.000687999	0.0639377
0.000688999	0.0638928
0.000689999	0.063838
0.000690999	0.0637931
0.000691999	0.0637482
0.000692999	0.0637083
0.000693999	0.0636734
0.000694999	0.0636336
0.000695999	0.0635937
0.000696999	0.0635638
0.000697999	0.0635438
0.000698999	0.0635089
0.000699999	0.063469
0.000700999	0.0634391
0.000701999	0.0634142
0.000702999	0.0633594
0.000703999	0.0632995
0.000704999	0.0632696
0.000705999	0.0632347
0.000706999	0.0631799
0.000708999	0.063135
0.000709999	0.0631101
0.000710999	0.0630602
0.000711999	0.0630154
0.000712999	0.0629904
0.000713999	0.0629456
0.000714999	0.0628857
0.000715999	0.0628309
0.000716999	0.0627811
0.000717999	0.0627362
0.000718999	0.0627063
0.000719999	0.0626714
0.000720999	0.0626315
0.000721999	0.0625966
0.000722999	0.0625617
0.000723999	0.0625168
0.000724999	0.0624769
0.000725999	0.0624321
0.000726999	0.0623722
0.000727999	0.0623274
0.000728999	0.0622975
0.000729999	0.0622775
0.000730999	0.0622526
0.000731999	0.0622077
0.000732999	0.0621778
0.000733999	0.0621529
0.000734999	0.062118
0.000735999	0.0620881
0.000736999	0.0620482
0.000737999	0.0619983
0.000738999	0.0619385
0.000739999	0.0618986
0.000740999	0.0618887
0.000741999	0.0618538
0.000742999	0.0617989
0.000743999	0.061759
0.000744999	0.0617241
0.000745999	0.0616893
0.000746999	0.0616643
0.000747999	0.0616294
0.000748999	0.0615995
0.000749999	0.0615746
0.000750999	0.0615397
0.000751999	0.0614898
0.000752999	0.061445
0.000753999	0.0614151
0.000754999	0.0613702
0.000755999	0.0613303
0.000756999	0.0613104
0.000757999	0.0612804
0.000758999	0.0612306
0.000760999	0.0611857
0.000761999	0.0611508
0.000762999	0.0611259
0.000763999	0.061086
0.000764999	0.0610262
0.000765999	0.0609763
0.000766999	0.0609414
0.000767999	0.0609165
0.000768999	0.0608766
0.000769999	0.0608318
0.000770999	0.0608068
0.000771999	0.0607769
0.000772999	0.0607221
0.000773999	0.0606722
0.000774999	0.0606274
0.000775999	0.0605875
0.000776999	0.0605725
0.000777999	0.0605376
0.000778999	0.0604878
0.000779999	0.0604579
0.000780999	0.0604379
0.000782999	0.060413
0.000783999	0.0603681
0.000784999	0.0603282
0.000785999	0.0602933
0.000786999	0.0602435
0.000787999	0.0602036
0.000788999	0.0601637
0.000789999	0.0601238
0.000790999	0.060079
0.000791999	0.0600441
0.000792999	0.0600291
0.000793999	0.0600092
0.000794999	0.0599743
0.000795999	0.0599394
0.000796999	0.0599244
0.000797999	0.0599045
0.000798999	0.0598746
0.000799999	0.0598496
0.000800999	0.0598347
0.000801999	0.0597998
0.000802999	0.0597599
0.000803999	0.05974
0.000804999	0.0597051
0.000805999	0.0596652
0.000806999	0.0596403
0.000807999	0.0596153
0.000808999	0.0595605
0.000809999	0.0595056
0.000811999	0.0594807
0.000812999	0.0594508
0.000813999	0.0594209
0.000814999	0.059396
0.000815999	0.0593611
0.000816999	0.0593312
0.000817999	0.0593012
0.000818999	0.0592713
0.000820999	0.0592514
0.000821999	0.0592364
0.000822999	0.0592115
0.000823999	0.0591866
0.000824999	0.0591617
0.000825999	0.0591268
0.000826999	0.0590869
0.000827999	0.059052
0.000828999	0.0590271
0.000829999	0.0589922
0.000830999	0.0589573
0.000831999	0.0589373
0.000832999	0.0589124
0.000833999	0.0588825
0.000834999	0.0588625
0.000835999	0.0588276
0.000836999	0.0587977
0.000837999	0.0587828
0.000839999	0.0587578
0.000840999	0.0587229
0.000841999	0.058693
0.000842999	0.0586531
0.000843999	0.0585983
0.000844999	0.0585684
0.000845999	0.0585485
0.000846999	0.0585285
0.000847999	0.0585086
0.000848999	0.0584687
0.000849999	0.0584338
0.000850999	0.0584138
0.000851999	0.0583939
0.000852999	0.058364
0.000853999	0.0583341
0.000854999	0.0583141
0.000855999	0.0582892
0.000856999	0.0582693
0.000857999	0.0582443
0.000858999	0.0582144
0.000859999	0.0581795
0.000860999	0.0581446
0.000861999	0.0580998
0.000862999	0.0580499
0.000863999	0.058005
0.000864999	0.0579652
0.000865999	0.0579203
0.000866999	0.0578605
0.000867999	0.0578206
0.000868999	0.0577807
0.000869999	0.0577408
0.000871999	0.0577159
0.000872999	0.057691
0.000873999	0.057666
0.000874999	0.0576461
0.000875999	0.0576162
0.000876999	0.0575913
0.000877999	0.0575713
0.000878999	0.0575264
0.000879999	0.0574766
0.000880999	0.0574467
0.000881999	0.0574168
0.000882999	0.0573819
0.000883999	0.057352
0.000884999	0.057327
0.000885999	0.0573071
0.000886999	0.0572722
0.000887999	0.0572223
0.000888999	0.0571825
0.000889999	0.0571625
0.000890999	0.0571525
0.000891999	0.0571226
0.000892999	0.0570778
0.000893999	0.0570429
0.000894999	0.0570229
0.000895999	0.057003
0.000896999	0.0569731
0.000897999	0.0569481
0.000898999	0.0569332
0.000899999	0.0569232
0.000900999	0.0569132
0.000901999	0.0568883
0.000902999	0.0568484
0.000903999	0.0568135
0.000904999	0.0567836
0.000905999	0.0567437
0.000906999	0.0566939
0.000908999	0.056654
0.000909999	0.0566191
0.000910999	0.0565942
0.000911999	0.0565842
0.000912999	0.0565742
0.000914999	0.0565593
0.000915999	0.0565443
0.000916999	0.0565244
0.000917999	0.0564945
0.000918999	0.0564695
0.000921999	0.0564346
0.000922999	0.0563997
0.000923999	0.0563698
0.000924999	0.0563449
0.000925999	0.0563349
0.000926999	0.0562951
0.000927999	0.0562452
0.000928999	0.0562253
0.000929999	0.0562153
0.000930999	0.0561953
0.000931999	0.0561704
0.000932999	0.0561555
0.000933999	0.0561455
0.000934999	0.0561256
0.000935999	0.0561006
0.000936999	0.0560857
0.000937999	0.0560607
0.000938999	0.0560258
0.000939999	0.055981
0.000940999	0.0559361
0.000941999	0.0559112
0.000942999	0.0558912
0.000944999	0.0558713
0.000945999	0.0558514
0.000946999	0.0558264
0.000947999	0.0558015
0.000948999	0.0557816
0.000949999	0.0557516
0.000950999	0.0557267
0.000951999	0.0557118
0.000952999	0.0556918
0.000953999	0.0556769
0.000954999	0.0556569
0.000955999	0.055632
0.000956999	0.055617
0.000958999	0.0555971
0.000959999	0.0555722
0.000960999	0.0555572
0.000961999	0.0555273
0.000962999	0.0554974
0.000963999	0.0554874
0.000964999	0.0554775
0.000965999	0.0554575
0.000966999	0.0554376
0.000967999	0.0554276
0.000968999	0.0554126
0.000969999	0.0553827
0.000970999	0.0553428
0.000972999	0.0553129
0.000973999	0.055293
0.000974999	0.0552631
0.000976999	0.0552282
0.000977999	0.0551933
0.000978999	0.0551534
0.000979999	0.0551185
0.000980999	0.0550986
0.000981999	0.0550736
0.000982999	0.0550437
0.000983999	0.0550138
0.000984999	0.0549739
0.000986999	0.054939
0.000987999	0.0549191
0.000988999	0.0549091
0.000989999	0.0548892
0.000990999	0.0548692
0.000991999	0.0548443
0.000992999	0.0548044
0.000993999	0.0547795
0.000994999	0.0547645
0.000995999	0.0547446
0.000997999	0.0547296
0.000999999	0.0547147
0.001001	0.0546898
0.001002	0.0546598
0.001003	0.0546299
0.001004	0.0546
0.001005	0.0545601
0.001006	0.0545203
0.001007	0.0544953
0.001008	0.0544754
0.001009	0.0544554
0.00101	0.0544355
0.001011	0.0544156
0.001012	0.0544006
0.001013	0.0543906
0.001014	0.0543607
0.001015	0.0543308
0.001016	0.0543159
0.001017	0.054276
0.001018	0.0542361
0.001019	0.0542112
0.00102	0.0541812
0.001021	0.0541563
0.001022	0.0541414
0.001023	0.0541214
0.001024	0.0541015
0.001026	0.0540815
0.001028	0.0540566
0.001029	0.0540417
0.00103	0.0540217
0.001031	0.0540018
0.001033	0.0539768
0.001034	0.0539519
0.001035	0.053917
0.001037	0.0538821
0.001038	0.0538522
0.00104	0.0538073
0.001041	0.0537774
0.001042	0.0537525
0.001043	0.0537176
0.001044	0.0536927
0.001045	0.0536777
0.001046	0.0536628
0.001048	0.0536478
0.001049	0.0536329
0.00105	0.053598
0.001051	0.0535581
0.001052	0.0535381
0.001053	0.0535132
0.001054	0.0534933
0.001055	0.0534783
0.001056	0.0534634
0.001057	0.0534534
0.001058	0.0534285
0.001059	0.0533936
0.00106	0.0533686
0.001061	0.0533537
0.001062	0.0533337
0.001064	0.0533088
0.001066	0.0532889
0.001067	0.0532689
0.001068	0.053244
0.001069	0.0532241
0.00107	0.0532141
0.001071	0.0532041
0.001073	0.0531842
0.001074	0.0531493
0.001075	0.0531144
0.001076	0.0530745
0.001077	0.0530446
0.001078	0.0530246
0.001079	0.0529947
0.00108	0.0529698
0.001081	0.0529399
0.001082	0.05291
0.001083	0.052885
0.001084	0.0528601
0.001085	0.0528452
0.001086	0.0528202
0.001087	0.0527754
0.001088	0.0527405
0.001089	0.0527255
0.00109	0.0527155
0.001092	0.0527056
0.001093	0.0526757
0.001094	0.0526408
0.001095	0.0526109
0.001096	0.052576
0.001097	0.0525411
0.001098	0.0525111
0.001099	0.0524862
0.0011	0.0524563
0.001101	0.0524314
0.001102	0.0524164
0.001103	0.0523865
0.001104	0.0523367
0.001105	0.0523018
0.001106	0.0522619
0.001107	0.052217
0.001108	0.0521921
0.001109	0.0521572
0.00111	0.0521273
0.001111	0.0521073
0.001112	0.0520774
0.001113	0.0520525
0.001114	0.0520176
0.001115	0.0519877
0.001116	0.0519727
0.001117	0.0519578
0.001119	0.0519478
0.00112	0.0519328
0.001121	0.0519079
0.001122	0.051883
0.001123	0.051863
0.001124	0.0518431
0.001125	0.0518232
0.001126	0.0518082
0.001127	0.0517932
0.001129	0.0517733
0.00113	0.0517434
0.001132	0.0517135
0.001134	0.0516935
0.001135	0.0516636
0.001136	0.0516387
0.001139	0.0516138
0.00114	0.0515739
0.001141	0.051549
0.001142	0.051534
0.001143	0.0514991
0.001144	0.0514592
0.001145	0.0514393
0.001146	0.0514193
0.001147	0.0513894
0.001148	0.0513695
0.001149	0.0513396
0.00115	0.0513047
0.001151	0.0512847
0.001152	0.0512648
0.001153	0.0512449
0.001154	0.05121
0.001156	0.0511651
0.001157	0.0511352
0.001158	0.0511102
0.001159	0.0510853
0.00116	0.0510654
0.001161	0.0510504
0.001162	0.0510355
0.001164	0.0510205
0.001165	0.0510105
0.001166	0.0510006
0.001167	0.0509856
0.001168	0.0509607
0.001169	0.0509258
0.00117	0.0508909
0.001171	0.050866
0.001173	0.050846
0.001174	0.0508211
0.001176	0.0507962
0.001177	0.0507762
0.001179	0.0507613
0.00118	0.0507463
0.001181	0.0507314
0.001183	0.0507164
0.001184	0.0506865
0.001185	0.0506516
0.001186	0.0506117
0.001187	0.0505668
0.001188	0.0505319
0.001189	0.050507
0.00119	0.0504921
0.001191	0.0504821
0.001192	0.0504671
0.001194	0.0504472
0.001195	0.0504223
0.001196	0.0503874
0.001197	0.0503575
0.001199	0.0503425
0.0012	0.0503325
0.001201	0.0503226
0.001202	0.0503076
0.001203	0.0502777
0.001204	0.0502428
0.001205	0.0502228
0.001206	0.0502129
0.001207	0.0502029
0.001208	0.050183
0.001209	0.0501481
0.00121	0.0501182
0.001212	0.0500833
0.001213	0.0500484
0.001214	0.0500334
0.001215	0.0500135
0.001216	0.0499935
0.001217	0.0499835
0.001219	0.0499686
0.00122	0.0499437
0.001221	0.0499237
0.001222	0.0499088
0.001223	0.0498838
0.001224	0.0498639
0.001226	0.0498539
0.001227	0.049834
0.001229	0.0497991
0.001231	0.0497742
0.001233	0.0497642
0.001234	0.0497492
0.001235	0.0497243
0.001236	0.0497044
0.001237	0.0496894
0.001238	0.0496745
0.001239	0.0496495
0.00124	0.0496196
0.001241	0.0496047
0.001242	0.0495797
0.001243	0.0495548
0.001244	0.0495448
0.001245	0.0495349
0.001246	0.0495149
0.001247	0.049495
0.001248	0.049485
0.001249	0.0494651
0.00125	0.0494451
0.001251	0.0494352
0.001252	0.0494152
0.001253	0.0493953
0.001254	0.0493803
0.001255	0.0493654
0.001256	0.0493554
0.001258	0.0493454
0.001259	0.0493305
0.00126	0.0493055
0.001261	0.0492657
0.001262	0.0492208
0.001263	0.0491759
0.001264	0.049146
0.001265	0.049131
0.001266	0.0491111
0.001268	0.0490961
0.001269	0.0490812
0.001272	0.0490563
0.001274	0.0490264
0.001275	0.0489915
0.001278	0.0489665
0.001279	0.0489566
0.001281	0.0489366
0.001282	0.0489167
0.001283	0.0489067
0.001284	0.0488917
0.001285	0.0488768
0.001286	0.0488618
0.001288	0.0488469
0.001289	0.0488369
0.001292	0.0488269
0.001293	0.048817
0.001294	0.048802
0.001295	0.0487771
0.001296	0.0487571
0.001298	0.0487372
0.001299	0.0487173
0.0013	0.0487073
0.001301	0.0486923
0.001302	0.0486774
0.001303	0.0486624
0.001304	0.0486275
0.001306	0.0485827
0.001307	0.0485577
0.001308	0.0485328
0.001309	0.0485079
0.001311	0.0484979
0.001312	0.0484879
0.001313	0.048473
0.001314	0.048458
0.001317	0.0484431
0.001318	0.0484281
0.001319	0.0484131
0.00132	0.0483982
0.001321	0.0483832
0.001322	0.0483683
0.001323	0.0483583
0.001324	0.0483483
0.001325	0.0483234
0.001327	0.0482935
0.001328	0.0482736
0.00133	0.0482586
0.001332	0.0482337
0.001333	0.0481938
0.001334	0.0481589
0.001335	0.048124
0.001336	0.0480891
0.001337	0.0480692
0.00134	0.0480392
0.001341	0.0480093
0.001343	0.0479894
0.001344	0.0479694
0.001345	0.0479545
0.001346	0.0479395
0.001347	0.0479246
0.001348	0.0479096
0.00135	0.0478997
0.001351	0.0478897
0.001353	0.0478548
0.001354	0.0478099
0.001355	0.047785
0.001357	0.04777
0.001358	0.0477551
0.001359	0.0477302
0.00136	0.0477102
0.001361	0.0477002
0.001362	0.0476903
0.001363	0.0476803
0.001364	0.0476504
0.001366	0.0476155
0.001367	0.0475906
0.001368	0.0475706
0.001369	0.0475557
0.00137	0.0475357
0.001371	0.0475208
0.001372	0.0475108
0.001373	0.0475008
0.001377	0.0474809
0.001378	0.0474609
0.001382	0.047446
0.001383	0.0474211
0.001384	0.0473961
0.001385	0.0473762
0.001386	0.0473413
0.001387	0.0473014
0.001388	0.0472815
0.001389	0.0472615
0.00139	0.0472366
0.001392	0.0472117
0.001393	0.0471768
0.001394	0.0471518
0.001395	0.0471419
0.001396	0.0471219
0.001398	0.047102
0.001399	0.047092
0.0014	0.047082
0.001401	0.0470721
0.001403	0.0470621
0.001404	0.0470521
0.001406	0.0470172
0.001407	0.0469724
0.001408	0.0469474
0.00141	0.0469225
0.001411	0.0468926
0.001412	0.0468727
0.001414	0.0468577
0.001416	0.0468378
0.001417	0.0468228
0.001418	0.0468128
0.001419	0.0467979
0.00142	0.046773
0.001421	0.046748
0.001422	0.0467331
0.001423	0.0467181
0.001425	0.0467032
0.001426	0.0466832
0.001427	0.0466583
0.001428	0.0466433
0.001429	0.0466284
0.001431	0.0466035
0.001432	0.0465835
0.001433	0.0465686
0.001434	0.0465486
0.001437	0.0465337
0.001438	0.0465237
0.001439	0.0465087
0.001442	0.0464938
0.001444	0.0464788
0.001446	0.0464589
0.001447	0.0464389
0.001449	0.046424
0.00145	0.046414
0.001451	0.0463991
0.001452	0.0463741
0.001453	0.0463542
0.001454	0.0463442
0.001455	0.0463342
0.001457	0.0463243
0.001459	0.0462993
0.00146	0.0462744
0.001461	0.0462644
0.001462	0.0462545
0.001463	0.0462395
0.001464	0.0462246
0.001465	0.0462146
0.001466	0.0462046
0.001468	0.0461847
0.001469	0.0461647
0.001472	0.0461498
0.001473	0.0461149
0.001474	0.04608
0.001475	0.046065
0.001476	0.0460501
0.001477	0.0460251
0.001478	0.0459952
0.001479	0.0459653
0.00148	0.0459354
0.001481	0.0459105
0.001484	0.0458756
0.001485	0.0458457
0.001486	0.0458257
0.001487	0.0458008
0.00149	0.0457858
0.001492	0.0457759
0.001493	0.0457559
0.001494	0.045731
0.001495	0.0457061
0.001496	0.0456861
0.001497	0.0456612
0.001499	0.0456363
0.0015	0.0456213
0.001501	0.0456064
0.001502	0.0455914
0.001503	0.0455715
0.001505	0.0455565
0.001506	0.0455416
0.001507	0.0455266
0.001508	0.0455067
0.001509	0.0454817
0.00151	0.0454668
0.001511	0.0454518
0.001512	0.0454369
0.001513	0.0454219
0.001514	0.045402
0.001515	0.045382
0.001516	0.0453671
0.001517	0.0453421
0.001518	0.0453072
0.001519	0.0452823
0.00152	0.0452624
0.001521	0.0452375
0.001522	0.0452026
0.001525	0.0451776
0.001526	0.0451677
0.001527	0.0451527
0.001528	0.0451377
0.001531	0.0451278
0.001532	0.0451128
0.001533	0.0450879
0.001534	0.045063
0.001536	0.045048
0.001538	0.0450331
0.001539	0.0450181
0.00154	0.0449982
0.001541	0.0449782
0.001542	0.0449682
0.001543	0.0449583
0.001545	0.0449483
0.001546	0.0449333
0.001547	0.0449134
0.001548	0.0448935
0.001549	0.0448735
0.00155	0.0448536
0.001551	0.0448386
0.001554	0.0448137
0.001556	0.0447888
0.001558	0.0447738
0.00156	0.0447589
0.001561	0.0447439
0.001562	0.044724
0.001563	0.044704
0.001564	0.0446891
0.001565	0.0446741
0.001567	0.0446542
0.001568	0.0446392
0.001569	0.0446243
0.00157	0.0446093
0.001573	0.0445943
0.001574	0.0445794
0.001575	0.0445644
0.001576	0.0445495
0.001577	0.0445295
0.001578	0.0445096
0.001579	0.0444946
0.00158	0.0444697
0.001582	0.0444448
0.001583	0.0444099
0.001585	0.044375
0.001586	0.04436
0.001587	0.0443401
0.001589	0.0442952
0.00159	0.0442603
0.001591	0.0442454
0.001593	0.0442204
0.001596	0.0441855
0.001597	0.0441506
0.001599	0.0441257
0.001601	0.0441108
0.001602	0.0441008
0.001603	0.0440858
0.001604	0.0440709
0.001605	0.044041
0.001606	0.0440061
0.001608	0.0439761
0.001609	0.0439512
0.00161	0.0439363
0.001611	0.0439213
0.001613	0.0439064
0.001615	0.0438914
0.001616	0.0438764
0.001617	0.0438615
0.001618	0.0438515
0.001619	0.0438415
0.001621	0.0438316
0.001622	0.0438216
0.001623	0.0438066
0.001624	0.0437817
0.001625	0.0437568
0.001626	0.0437418
0.001627	0.0437319
0.001629	0.0437069
0.001633	0.043677
0.001634	0.0436621
0.001635	0.0436521
0.001636	0.0436421
0.00164	0.0436222
0.001641	0.0435973
0.001642	0.0435673
0.001643	0.0435424
0.001644	0.0435225
0.001646	0.0435025
0.001647	0.0434926
0.001648	0.0434826
0.00165	0.0434726
0.001652	0.0434577
0.001653	0.0434427
0.001654	0.0434327
0.001655	0.0434228
0.001656	0.0434128
0.001658	0.0434028
0.001659	0.0433779
0.00166	0.043353
0.001661	0.043343
0.001662	0.043328
0.001664	0.0433081
0.001666	0.0432932
0.00167	0.0432732
0.001671	0.0432533
0.001674	0.0432333
0.001677	0.0432134
0.001678	0.0431934
0.00168	0.0431735
0.001681	0.0431585
0.001683	0.0431286
0.001684	0.0430937
0.001685	0.0430738
0.001686	0.0430638
0.001688	0.0430539
0.00169	0.0430339
0.001691	0.043014
0.001693	0.043004
0.001694	0.0429791
0.001695	0.0429541
0.001696	0.0429392
0.001698	0.0429192
0.001699	0.0428943
0.001701	0.0428744
0.001702	0.0428594
0.001703	0.0428395
0.001704	0.0428245
0.001707	0.0428046
0.001708	0.0427846
0.00171	0.0427697
0.001711	0.0427547
0.001712	0.0427398
0.001714	0.0427248
0.001718	0.0427148
0.00172	0.0427049
0.001721	0.0426849
0.001722	0.042665
0.001723	0.04265
0.001724	0.0426351
0.001725	0.0426201
0.001726	0.0426052
0.001727	0.0425802
0.001729	0.0425453
0.00173	0.0425204
0.001733	0.0425005
0.001734	0.0424755
0.001736	0.0424556
0.001737	0.0424456
0.001738	0.0424357
0.001739	0.0424207
0.00174	0.0424058
0.001744	0.0423958
0.001745	0.0423808
0.001746	0.0423659
0.001747	0.0423559
0.001749	0.0423409
0.001751	0.042321
0.001752	0.042306
0.001754	0.0422961
0.001757	0.0422861
0.001759	0.0422711
0.00176	0.0422562
0.001761	0.0422462
0.001763	0.0422362
0.001765	0.0422263
0.001766	0.0422113
0.001768	0.0421964
0.001769	0.0421864
0.00177	0.0421764
0.001772	0.0421665
0.001773	0.0421365
0.001775	0.0421016
0.001776	0.0420867
0.001777	0.0420618
0.001778	0.0420368
0.001779	0.0420269
0.00178	0.0420119
0.001782	0.041992
0.001783	0.041977
0.001784	0.0419621
0.001785	0.0419421
0.001786	0.0419272
0.001789	0.0419172
0.001791	0.0419072
0.001793	0.0418873
0.001794	0.0418574
0.001799	0.0418374
0.001802	0.0418274
0.001803	0.0418175
0.001804	0.0418025
0.001806	0.0417876
0.001808	0.0417776
0.001809	0.0417676
0.00181	0.0417577
0.001811	0.0417427
0.001812	0.0417277
0.001813	0.0417178
0.001814	0.0417028
0.001816	0.0416829
0.001817	0.0416629
0.001818	0.041648
0.00182	0.041633
0.001821	0.0416131
0.001822	0.0415981
0.001825	0.0415881
0.001826	0.0415782
0.001828	0.0415483
0.001829	0.0415184
0.00183	0.0415034
0.001832	0.0414884
0.001833	0.0414685
0.001834	0.0414436
0.001835	0.0414286
0.001837	0.0414137
0.001838	0.0413987
0.001841	0.0413837
0.001843	0.0413638
0.001844	0.0413488
0.001845	0.0413389
0.001847	0.0413289
0.001848	0.041314
0.00185	0.041294
0.001851	0.0412741
0.001852	0.0412591
0.001854	0.0412442
0.001855	0.0412292
0.001856	0.0412192
0.001857	0.0412093
0.001858	0.0411993
0.001859	0.0411893
0.00186	0.0411744
0.001862	0.0411494
0.001863	0.0411245
0.001865	0.0411046
0.001868	0.0410846
0.001869	0.0410697
0.00187	0.0410597
0.001871	0.0410497
0.001872	0.0410398
0.001873	0.0410248
0.001876	0.0410098
0.001882	0.0409999
0.001883	0.0409849
0.001885	0.04096
0.001887	0.0409351
0.001888	0.0409151
0.001889	0.0409002
0.001892	0.0408902
0.001893	0.0408802
0.001895	0.0408603
0.001896	0.0408403
0.001897	0.0408254
0.001898	0.0408104
0.001902	0.0408005
0.001904	0.0407855
0.001905	0.0407606
0.001906	0.0407307
0.001907	0.0407057
0.001908	0.0406808
0.00191	0.0406559
0.001913	0.040631
0.001914	0.040611
0.001915	0.040601
0.001916	0.0405911
0.001917	0.0405811
0.001918	0.0405661
0.001919	0.0405512
0.001921	0.0405263
0.001924	0.0405013
0.001925	0.0404914
0.001926	0.0404764
0.001927	0.0404565
0.001928	0.0404365
0.00193	0.0404216
0.001932	0.0404066
0.001935	0.0403917
0.001936	0.0403817
0.001937	0.0403717
0.001938	0.0403568
0.001939	0.0403418
0.00194	0.0403318
0.001941	0.0403169
0.001942	0.0403019
0.001943	0.0402919
0.001945	0.040282
0.001949	0.040267
0.001951	0.0402471
0.001952	0.0402221
0.001953	0.0402022
0.001954	0.0401922
0.001955	0.0401823
0.001956	0.0401573
0.001959	0.0401274
0.001962	0.0401125
0.001965	0.0401025
0.001966	0.0400925
0.001967	0.0400776
0.001968	0.0400576
0.001969	0.0400377
0.00197	0.0400227
0.001971	0.0400078
0.001973	0.0399878
0.001974	0.0399729
0.001975	0.0399629
0.001976	0.0399529
0.001977	0.039943
0.00198	0.039923
0.001981	0.0399031
0.001982	0.0398931
0.001983	0.0398831
0.001984	0.0398732
0.001985	0.0398532
0.00199	0.0398333
0.001991	0.0398183
0.001992	0.0397984
0.001996	0.0397784
0.001999	0.0397585
0.002	0.0397436
0.002001	0.0397336
0.002002	0.0397236
0.002003	0.0397136
0.002007	0.0396987
0.002008	0.0396837
0.002009	0.0396738
0.00201	0.0396488
0.002011	0.0396189
0.002012	0.039604
0.002013	0.039594
0.002014	0.039579
0.002015	0.0395591
0.002016	0.0395292
0.002017	0.0395043
0.002018	0.0394943
0.00202	0.0394793
0.002021	0.0394544
0.002022	0.0394345
0.002023	0.0394245
0.002024	0.0394145
0.002025	0.0393996
0.002031	0.0393796
0.002033	0.0393597
0.002034	0.0393447
0.002036	0.0393347
0.002037	0.0393248
0.002039	0.0392999
0.00204	0.0392749
0.002041	0.03926
0.002042	0.039245
0.002043	0.039235
0.002044	0.0392201
0.002045	0.0392051
0.002046	0.0391902
0.002048	0.0391702
0.002049	0.0391553
0.00205	0.0391453
0.002051	0.0391353
0.002052	0.0391254
0.002054	0.0391054
0.002055	0.0390855
0.002057	0.0390755
0.002058	0.0390655
0.002062	0.0390556
0.002063	0.0390456
0.002064	0.0390356
0.002067	0.0390107
0.002075	0.0389708
0.002076	0.0389409
0.002078	0.0389259
0.002079	0.038911
0.00208	0.038896
0.002081	0.0388811
0.002082	0.0388611
0.002085	0.0388462
0.002086	0.0388312
0.002087	0.0388163
0.002089	0.0388063
0.002091	0.0387913
0.002093	0.0387764
0.002096	0.0387664
0.002098	0.0387564
0.002099	0.0387465
0.002102	0.0387365
0.002106	0.0387265
0.002107	0.0387166
0.002108	0.0387066
0.002109	0.0386866
0.002113	0.0386667
0.002115	0.0386567
0.002117	0.0386418
0.002119	0.0386268
0.00212	0.0386169
0.002121	0.0386069
0.002122	0.0385969
0.002123	0.038582
0.002124	0.038562
0.002128	0.0385471
0.002131	0.0385321
0.002134	0.0385122
0.002138	0.0384972
0.00214	0.0384872
0.002142	0.0384773
0.002143	0.0384673
0.002144	0.0384523
0.002145	0.0384274
0.002146	0.0384025
0.002149	0.0383825
0.00215	0.0383676
0.002151	0.0383476
0.002153	0.0383277
0.002155	0.0383078
0.002156	0.0382878
0.002159	0.0382729
0.00216	0.0382579
0.002161	0.038238
0.002162	0.038218
0.002163	0.0382081
0.002164	0.0381931
0.002165	0.0381781
0.00217	0.0381682
0.002172	0.0381532
0.002173	0.0381333
0.002175	0.0381183
0.002178	0.0381083
0.002179	0.0380934
0.00218	0.0380784
0.002181	0.0380685
0.002183	0.0380585
0.002188	0.0380485
0.002189	0.0380385
0.002192	0.0380236
0.002193	0.0380086
0.002194	0.0379987
0.002195	0.0379887
0.002197	0.0379787
0.002201	0.0379688
0.002203	0.0379588
0.002205	0.0379488
0.002206	0.0379339
0.002207	0.0379189
0.002209	0.0379039
0.002212	0.037884
0.002213	0.037869
0.002214	0.0378591
0.002217	0.0378491
0.002219	0.0378391
0.002222	0.0378242
0.002223	0.0378042
0.002226	0.0377893
0.002229	0.0377793
0.00223	0.0377594
0.002231	0.0377394
0.002232	0.0377295
0.002234	0.0377195
0.002236	0.0377045
0.002238	0.0376896
0.00224	0.0376796
0.002245	0.0376696
0.002246	0.0376547
0.002248	0.0376397
0.00225	0.0376297
0.002252	0.0376148
0.002253	0.0375998
0.002254	0.0375849
0.002256	0.0375699
0.002257	0.037555
0.002268	0.03754
0.00227	0.03753
0.002272	0.0375201
0.002273	0.0375101
0.002274	0.0374802
0.002275	0.0374503
0.002276	0.0374403
0.002277	0.0374303
0.002281	0.0374204
0.002282	0.0374104
0.002283	0.0374004
0.002285	0.0373904
0.002286	0.0373805
0.002287	0.0373655
0.002288	0.0373506
0.00229	0.0373406
0.002292	0.0373306
0.002294	0.0373157
0.002295	0.0373007
0.002299	0.0372907
0.002302	0.0372808
0.002303	0.0372708
0.002304	0.0372608
0.002306	0.0372509
0.002307	0.0372359
0.00231	0.0372209
0.002312	0.037211
0.002313	0.037201
0.002314	0.037191
0.002316	0.0371811
0.002319	0.0371661
0.002321	0.0371511
0.002322	0.0371412
0.002323	0.0371312
0.002325	0.0371212
0.002328	0.0371113
0.00233	0.0371013
0.002333	0.0370814
0.002334	0.0370564
0.002335	0.0370415
0.002336	0.0370315
0.002337	0.0370215
0.002341	0.0370116
0.002342	0.0369916
0.002344	0.0369667
0.002347	0.0369517
0.002349	0.0369418
0.00235	0.0369318
0.002351	0.0369168
0.002352	0.0369019
0.002354	0.0368869
0.002359	0.036872
0.00236	0.036862
0.002361	0.036852
0.002366	0.0368421
0.002367	0.0368321
0.002368	0.0368221
0.002372	0.0368121
0.002374	0.0367972
0.002376	0.0367822
0.002377	0.0367573
0.002379	0.0367324
0.00238	0.0367174
0.002382	0.0367025
0.002383	0.0366925
0.002386	0.0366775
0.002391	0.0366626
0.002394	0.0366526
0.002395	0.0366426
0.002398	0.0366327
0.002403	0.0366227
0.002404	0.0366127
0.002405	0.0366028
0.002407	0.0365878
0.002408	0.0365629
0.002409	0.0365429
0.00241	0.036533
0.002411	0.036518
0.002413	0.0364981
0.002414	0.0364831
0.002416	0.0364731
0.002419	0.0364632
0.002421	0.0364532
0.002423	0.0364432
0.002429	0.0364333
0.00243	0.0364233
0.002431	0.0364133
0.002432	0.0364033
0.002434	0.0363934
0.002436	0.0363834
0.002438	0.0363734
0.00244	0.0363535
0.002444	0.0363286
0.002446	0.0363136
0.002448	0.0363036
0.002449	0.0362937
0.002455	0.0362837
0.002456	0.0362737
0.002457	0.0362588
0.002458	0.0362288
0.00246	0.0361989
0.002464	0.036184
0.002465	0.036174
0.002466	0.036164
0.002469	0.0361541
0.00247	0.0361341
0.002471	0.0361142
0.002472	0.0360893
0.002474	0.0360643
0.002479	0.0360494
0.002482	0.0360344
0.002487	0.0360145
0.002488	0.0359896
0.002489	0.0359746
0.002491	0.0359547
0.002492	0.0359297
0.002494	0.0359148
0.002496	0.0359048
0.002497	0.0358948
0.0025	0.0358849
0.002503	0.0358699
0.002504	0.0358549
0.002511	0.03584
[truncated: 3,334 more rows]

## Sheet: s=0
0	0.994192
9.99999e-07	0.850691
2e-06	0.657949
3e-06	0.569093
4e-06	0.512321
5e-06	0.471959
5.99999e-06	0.441079
6.99999e-06	0.41648
7.99999e-06	0.396044
8.99999e-06	0.378595
9.99999e-06	0.363442
1.1e-05	0.350161
1.2e-05	0.338508
1.3e-05	0.328075
1.4e-05	0.318661
1.5e-05	0.310546
1.6e-05	0.302856
1.7e-05	0.29569
1.8e-05	0.289506
1.9e-05	0.283534
2e-05	0.277737
2.1e-05	0.272528
2.2e-05	0.26767
2.3e-05	0.263077
2.4e-05	0.258574
2.5e-05	0.254415
2.6e-05	0.25092
2.7e-05	0.24742
2.8e-05	0.243935
2.9e-05	0.240546
3e-05	0.237199
3.1e-05	0.234287
3.2e-05	0.231667
3.3e-05	0.228994
3.4e-05	0.226268
3.5e-05	0.223669
3.6e-05	0.221139
3.7e-05	0.218514
3.8e-05	0.216063
3.9e-05	0.213963
4e-05	0.212075
4.1e-05	0.210197
4.2e-05	0.208267
4.3e-05	0.206241
4.4e-05	0.204352
4.5e-05	0.202565
4.6e-05	0.200767
4.7e-05	0.199038
4.8e-05	0.197346
4.9e-05	0.195765
5e-05	0.194238
5.09999e-05	0.192779
5.19999e-05	0.191464
5.29999e-05	0.190154
5.39999e-05	0.188685
5.49999e-05	0.187216
5.59999e-05	0.185837
5.69999e-05	0.184564
5.79999e-05	0.183365
5.89999e-05	0.182097
5.99999e-05	0.180846
6.09999e-05	0.179684
6.19999e-05	0.178512
6.29999e-05	0.177398
6.39999e-05	0.176369
6.49999e-05	0.175308
6.59999e-05	0.174211
6.69999e-05	0.173129
6.79999e-05	0.172153
6.89999e-05	0.171171
6.99999e-05	0.170068
7.09999e-05	0.168997
7.19999e-05	0.168042
7.29999e-05	0.167087
7.39999e-05	0.166159
7.49999e-05	0.165263
7.59999e-05	0.164255
7.69999e-05	0.163391
7.79999e-05	0.162706
7.89999e-05	0.162001
7.99999e-05	0.161211
8.09999e-05	0.160341
8.19999e-05	0.159524
8.29999e-05	0.15875
8.39999e-05	0.158066
8.49999e-05	0.157371
8.59999e-05	0.156681
8.69999e-05	0.156024
8.79999e-05	0.15527
8.89999e-05	0.154491
8.99999e-05	0.153732
9.09999e-05	0.153006
9.19999e-05	0.152231
9.29999e-05	0.151483
9.39999e-05	0.150842
9.49999e-05	0.150189
9.59999e-05	0.149569
9.69999e-05	0.148969
9.79999e-05	0.148375
9.89999e-05	0.147824
9.99999e-05	0.147214
0.000101	0.146508
0.000102	0.145798
0.000103	0.145188
0.000104	0.144594
0.000105	0.14392
0.000106	0.143263
0.000107	0.142743
0.000108	0.142281
0.000109	0.141777
0.00011	0.141247
0.000111	0.140733
0.000112	0.140239
0.000113	0.139645
0.000114	0.139046
0.000115	0.138537
0.000116	0.138054
0.000117	0.137609
0.000118	0.1372
0.000119	0.136728
0.00012	0.136187
0.000121	0.135699
0.000122	0.135312
0.000123	0.134861
0.000124	0.134379
0.000125	0.134018
0.000126	0.133684
0.000127	0.133328
0.000128	0.132952
0.000129	0.132533
0.00013	0.132093
0.000131	0.131705
0.000132	0.131361
0.000133	0.131
0.000134	0.130729
0.000135	0.13047
0.000136	0.130114
0.000137	0.129695
0.000138	0.129297
0.000139	0.129006
0.00014	0.128682
0.000141	0.128364
0.000142	0.128014
0.000143	0.127606
0.000144	0.127208
0.000145	0.12681
0.000146	0.126481
0.000147	0.126147
0.000148	0.125808
0.000149	0.125489
0.00015	0.125176
0.000151	0.124906
0.000152	0.12463
0.000153	0.124243
0.000154	0.123845
0.000155	0.123511
0.000156	0.123203
0.000157	0.122938
0.000158	0.122631
0.000159	0.122249
0.00016	0.121861
0.000161	0.121458
0.000162	0.121119
0.000163	0.120848
0.000164	0.120535
0.000165	0.120132
0.000166	0.119793
0.000167	0.119549
0.000168	0.119326
0.000169	0.119098
0.00017	0.118822
0.000171	0.118573
0.000172	0.118334
0.000173	0.11808
0.000174	0.117772
0.000175	0.117438
0.000176	0.117114
0.000177	0.116833
0.000178	0.116542
0.000179	0.116261
0.00018	0.115985
0.000181	0.115693
0.000182	0.11546
0.000183	0.115232
0.000184	0.114993
0.000185	0.114797
0.000186	0.114622
0.000187	0.11441
0.000188	0.114176
0.000189	0.113948
0.00019	0.113704
0.000191	0.113428
0.000192	0.113158
0.000193	0.112919
0.000194	0.112734
0.000195	0.112543
0.000196	0.112325
0.000197	0.112124
0.000198	0.111885
0.000199	0.111652
0.0002	0.111418
0.000201	0.111137
0.000202	0.110851
0.000203	0.110575
0.000204	0.110379
0.000205	0.110225
0.000206	0.110029
0.000207	0.109811
0.000208	0.109572
0.000209	0.109371
0.00021	0.109159
0.000211	0.108915
0.000212	0.108724
0.000213	0.108554
0.000214	0.108331
0.000215	0.108066
0.000216	0.107875
0.000217	0.107695
0.000218	0.107451
0.000219	0.107244
0.00022	0.107027
0.000221	0.106772
0.000222	0.10656
0.000223	0.10639
0.000224	0.106194
0.000225	0.10596
0.000226	0.105764
0.000227	0.1056
0.000228	0.105435
0.000229	0.105266
0.00023	0.105054
0.000231	0.104831
0.000232	0.104656
0.000233	0.104497
0.000234	0.104337
0.000235	0.104194
0.000236	0.104067
0.000237	0.103929
0.000238	0.103775
0.000239	0.103595
0.00024	0.103383
0.000241	0.103187
0.000242	0.103033
0.000243	0.102821
0.000244	0.102624
0.000245	0.102486
0.000246	0.102333
0.000247	0.102195
0.000248	0.102057
0.000249	0.101898
0.00025	0.101717
0.000251	0.101511
0.000252	0.101304
0.000253	0.101134
0.000254	0.10098
0.000255	0.10081
0.000256	0.100651
0.000257	0.100524
0.000258	0.10036
0.000259	0.100179
0.00026	0.10002
0.000261	0.0998557
0.000262	0.0997072
0.000263	0.099564
0.000264	0.0994367
0.000265	0.0993307
0.000266	0.0991768
0.000267	0.0989753
0.000268	0.0988003
0.000269	0.0986624
0.00027	0.098482
0.000271	0.0982487
0.000272	0.0980524
0.000273	0.097888
0.000274	0.097713
0.000275	0.0975486
0.000276	0.097416
0.000277	0.0972568
0.000278	0.0971189
0.000279	0.0969863
0.00028	0.0968272
0.000281	0.0967265
0.000282	0.0966204
0.000283	0.0964984
0.000284	0.0963923
0.000285	0.0962756
0.000286	0.0961165
0.000287	0.0959468
0.000288	0.0957983
0.000289	0.0956233
0.00029	0.0954907
0.000291	0.0954005
0.000292	0.0952679
0.000293	0.09513
0.000294	0.0950186
0.000295	0.0949391
0.000296	0.0948224
0.000297	0.0946792
0.000298	0.094536
0.000299	0.0944246
0.0003	0.0943185
0.000301	0.0941806
0.000302	0.0940692
0.000303	0.0939631
0.000304	0.0938465
0.000305	0.0937245
0.000306	0.0935919
0.000307	0.0934434
0.000308	0.0932896
0.000309	0.0931676
0.00031	0.0930509
0.000311	0.0928865
0.000312	0.0927327
0.000313	0.092616
0.000314	0.0925046
0.000315	0.0924038
0.000316	0.0922818
0.000317	0.0921439
0.000318	0.0919689
0.000319	0.0918204
0.00032	0.0917249
0.000321	0.0916188
0.000322	0.0915075
0.000323	0.0913749
0.000324	0.0912476
0.000325	0.091115
0.000326	0.0909983
0.000327	0.0909081
0.000328	0.0907914
0.000329	0.0906801
0.00033	0.0905793
0.000331	0.0904997
0.000332	0.0904149
0.000333	0.0902982
0.000334	0.0901974
0.000335	0.0900966
0.000336	0.0899853
0.000337	0.0898686
0.000338	0.0897307
0.000339	0.0895875
0.00034	0.0894814
0.000341	0.0893753
0.000342	0.0892692
0.000343	0.0891579
0.000344	0.0890306
0.000345	0.088898
0.000346	0.0887707
0.000347	0.0886593
0.000348	0.0885267
0.000349	0.0884153
0.00035	0.0883464
0.000351	0.0882668
0.000352	0.0881554
0.000353	0.0880547
0.000354	0.0879327
0.000355	0.0878001
0.000356	0.0877046
0.000357	0.0876038
0.000358	0.087503
0.000359	0.0874129
0.00036	0.0873121
0.000361	0.0872007
0.000362	0.0871106
0.000363	0.0870363
0.000364	0.086909
0.000365	0.0867446
0.000366	0.0866173
0.000367	0.0865059
0.000368	0.0863998
0.000369	0.0862885
0.00037	0.086193
0.000371	0.0861134
0.000372	0.086018
0.000373	0.0859225
0.000374	0.0857952
0.000375	0.0856626
0.000376	0.0855777
0.000377	0.0854717
0.000378	0.0853391
0.000379	0.0852542
0.00038	0.0851906
0.000381	0.0850951
0.000382	0.084989
0.000383	0.0848723
0.000384	0.0847716
0.000385	0.0847132
0.000386	0.0846443
0.000387	0.0845594
0.000388	0.0844692
0.000389	0.0843844
0.00039	0.0842995
0.000391	0.08422
0.000392	0.0841457
0.000393	0.0840555
0.000394	0.0839495
0.000395	0.0838381
0.000396	0.0837426
0.000397	0.0836631
0.000398	0.0836047
0.000399	0.0835464
0.0004	0.0834827
0.000401	0.0833979
0.000402	0.0832812
0.000403	0.0831804
0.000404	0.0830584
0.000405	0.0829311
0.000406	0.0828569
0.000407	0.0828144
0.000408	0.0827455
0.000409	0.0826235
0.00041	0.082528
0.000411	0.0824591
0.000412	0.0823742
0.000413	0.0822681
0.000414	0.0821727
0.000415	0.0820825
0.000416	0.0819605
0.000417	0.081881
0.000418	0.0818226
0.000419	0.0817325
0.00042	0.0816476
0.000421	0.0815521
0.000422	0.081462
0.000423	0.0814089
0.000424	0.0813453
0.000425	0.0812498
0.000426	0.0811702
0.000427	0.081096
0.000428	0.0810005
0.000429	0.0809157
0.00043	0.0808308
0.000431	0.0807194
0.000432	0.0806239
0.000433	0.0805656
0.000434	0.0804967
0.000435	0.0804224
0.000436	0.0803588
0.000437	0.0802739
0.000438	0.0801731
0.000439	0.0800883
0.00044	0.0800246
0.000441	0.0799716
0.000442	0.0799079
0.000443	0.0798337
0.000444	0.0797435
0.000445	0.0796586
0.000446	0.0796056
0.000447	0.0795473
0.000448	0.0794783
0.000449	0.0794094
0.00045	0.079351
0.000451	0.0792874
0.000452	0.079229
0.000453	0.0791495
0.000454	0.0790487
0.000455	0.0789957
0.000456	0.0789267
0.000457	0.0788206
0.000458	0.0787358
0.000459	0.0786827
0.00046	0.0786191
0.000461	0.0785554
0.000462	0.0784918
0.000463	0.0784122
0.000464	0.0783433
0.000465	0.0782637
0.000466	0.0781736
0.000467	0.0780781
0.000468	0.0780091
0.000469	0.0779667
0.00047	0.0779084
0.000471	0.0778553
0.000472	0.0777864
0.000473	0.0777015
0.000474	0.0776273
0.000475	0.0775689
0.000476	0.0775106
0.000477	0.0774416
0.000478	0.0773727
0.000479	0.0772719
0.00048	0.0771711
0.000481	0.0771181
0.000482	0.0770757
0.000483	0.0770226
0.000484	0.0769537
0.000485	0.07689
0.000486	0.0768105
0.000487	0.0767097
0.000488	0.0766248
0.000489	0.07654
0.00049	0.076471
0.000491	0.0763968
0.000492	0.0763172
0.000493	0.0762483
0.000494	0.0761899
0.000495	0.0761422
0.000496	0.0760838
0.000497	0.0760255
0.000498	0.0759512
0.000499	0.075877
0.0005	0.0758346
0.000500999	0.0757921
0.000501999	0.0757179
0.000502999	0.0756489
0.000503999	0.0756065
0.000504999	0.0755747
0.000505999	0.0755375
0.000506999	0.0754633
0.000507999	0.075389
0.000508999	0.0753307
0.000509999	0.0752617
0.000510999	0.0751981
0.000511999	0.0751451
0.000512999	0.0750549
0.000513999	0.07497
0.000514999	0.0749223
0.000515999	0.0748746
0.000516999	0.0748056
0.000517999	0.0747314
0.000518999	0.0746836
0.000519999	0.0746412
0.000520999	0.0745829
0.000521999	0.0745033
0.000522999	0.0744343
0.000523999	0.074376
0.000524999	0.0743283
0.000525999	0.0743017
0.000526999	0.0742646
0.000527999	0.074201
0.000528999	0.0741373
0.000529999	0.0740949
0.000530999	0.0740472
0.000531999	0.0740047
0.000532999	0.0739623
0.000533999	0.073888
0.000534999	0.0738297
0.000535999	0.0737873
0.000536999	0.0737289
0.000537999	0.0736759
0.000538999	0.0736441
0.000539999	0.0735751
0.000540999	0.073485
0.000541999	0.0734266
0.000542999	0.0733736
0.000543999	0.0733258
0.000544999	0.0732781
0.000545999	0.0732304
0.000546999	0.0731879
0.000547999	0.0731402
0.000548999	0.0730766
0.000549999	0.0730076
0.000550999	0.0729546
0.000551999	0.072928
0.000552999	0.0728803
0.000553999	0.0727955
0.000554999	0.0727159
0.000555999	0.0726416
0.000556999	0.0725833
0.000557999	0.0725462
0.000558999	0.0725037
0.000559999	0.0724613
0.000560999	0.0724242
0.000561999	0.0723924
0.000562999	0.0723446
0.000563999	0.0722916
0.000564999	0.0722492
0.000565999	0.0721855
0.000566999	0.0721113
0.000567999	0.0720582
0.000568999	0.0720264
0.000569999	0.0719999
0.000570999	0.071984
0.000571999	0.0719627
0.000572999	0.0719097
0.000573999	0.0718673
0.000574999	0.0718301
0.000575999	0.0717877
0.000576999	0.0717559
0.000577999	0.0717188
0.000578999	0.0716869
0.000579999	0.0716286
0.000580999	0.0715597
0.000581999	0.0715013
0.000582999	0.0714589
0.000583999	0.0714164
0.000584999	0.0713369
0.000585999	0.0712626
0.000586999	0.071199
0.000587999	0.0711194
0.000588999	0.0710611
0.000589999	0.0710134
0.000590999	0.070955
0.000591999	0.0709073
0.000592999	0.0708702
0.000593999	0.070833
0.000594999	0.0707853
0.000595999	0.0707216
0.000596999	0.0706686
0.000597999	0.0706156
0.000598999	0.0705307
0.000599999	0.0704671
0.000600999	0.070414
0.000601999	0.070361
0.000602999	0.0703185
0.000603999	0.0702496
0.000604999	0.0702019
0.000605999	0.0701753
0.000606999	0.0701435
0.000607999	0.070117
0.000608999	0.0700746
0.000609999	0.0700374
0.000610999	0.0700056
0.000611999	0.0699738
0.000612999	0.0699473
0.000613999	0.0698889
0.000614999	0.0698306
0.000615999	0.0697882
0.000616999	0.0697351
0.000617999	0.0696874
0.000618999	0.069645
0.000619999	0.0696025
0.000620999	0.0695654
0.000621999	0.0695389
0.000622999	0.0695018
0.000623999	0.069454
0.000624999	0.0694063
0.000625999	0.0693639
0.000626999	0.069332
0.000627999	0.0692896
0.000628999	0.0692207
0.000630999	0.0691729
0.000631999	0.0691252
0.000632999	0.0690615
0.000633999	0.0690138
0.000634999	0.0689661
0.000635999	0.0689183
0.000636999	0.0688706
0.000637999	0.0688123
0.000638999	0.0687486
0.000639999	0.0687009
0.000640999	0.0686478
0.000641999	0.0685948
0.000642999	0.0685524
0.000643999	0.0684834
0.000644999	0.0684198
0.000645999	0.0683773
0.000646999	0.0683296
0.000647999	0.0682713
0.000648999	0.0682076
0.000649999	0.0681546
0.000650999	0.0681068
0.000651999	0.0680591
0.000652999	0.0680061
0.000653999	0.0679689
0.000654999	0.0679318
0.000655999	0.0678363
0.000656999	0.0677356
0.000657999	0.0676772
0.000658999	0.0676242
0.000659999	0.0675818
0.000660999	0.0675446
0.000661999	0.0674969
0.000662999	0.0674333
0.000663999	0.0673643
0.000664999	0.0673166
0.000665999	0.0672741
0.000666999	0.0672264
0.000667999	0.0671946
0.000668999	0.0671734
0.000669999	0.067115
0.000670999	0.0670196
0.000671999	0.0669559
0.000672999	0.0669029
0.000673999	0.0668498
0.000674999	0.066818
0.000675999	0.0667862
0.000676999	0.0667491
0.000677999	0.0666854
0.000678999	0.0666271
0.000679999	0.0665952
0.000680999	0.0665528
0.000681999	0.0664839
0.000682999	0.0664202
0.000683999	0.0663672
0.000684999	0.0663194
0.000685999	0.0662929
0.000686999	0.0662346
0.000687999	0.0661497
0.000688999	0.0660861
0.000689999	0.0660436
0.000690999	0.0660012
0.000691999	0.0659429
0.000692999	0.0658845
0.000693999	0.0658368
0.000694999	0.065805
0.000695999	0.0657891
0.000696999	0.0657572
0.000697999	0.0657042
0.000698999	0.0656671
0.000699999	0.0656299
0.000700999	0.0655822
0.000701999	0.0655504
0.000702999	0.0655239
0.000703999	0.0654867
0.000704999	0.065439
0.000705999	0.0653966
0.000706999	0.0653488
0.000707999	0.0653117
0.000708999	0.0653011
0.000709999	0.0652746
0.000710999	0.0652428
0.000711999	0.0652162
0.000712999	0.0651897
0.000713999	0.0651685
0.000714999	0.065142
0.000716999	0.0651155
0.000718999	0.065073
0.000719999	0.0650253
0.000720999	0.0649776
0.000721999	0.0649245
0.000722999	0.0648874
0.000723999	0.0648238
0.000724999	0.0647601
0.000725999	0.0647283
0.000726999	0.0646965
0.000727999	0.0646699
0.000728999	0.0646328
0.000729999	0.0645851
0.000730999	0.0645426
0.000731999	0.0644896
0.000732999	0.0644366
0.000733999	0.0643888
0.000734999	0.0643464
0.000735999	0.0643146
0.000736999	0.0642828
0.000737999	0.0642403
0.000738999	0.0641926
0.000739999	0.0641396
0.000740999	0.0640865
0.000741999	0.0640494
0.000742999	0.0640176
0.000743999	0.0639751
0.000744999	0.0639433
0.000745999	0.0639274
0.000746999	0.0639115
0.000747999	0.0638797
0.000748999	0.0638372
0.000749999	0.0638001
0.000750999	0.0637683
0.000751999	0.0637418
0.000752999	0.0637152
0.000753999	0.0636887
0.000754999	0.0636675
0.000755999	0.063641
0.000756999	0.0635933
0.000757999	0.0635508
0.000758999	0.063519
0.000759999	0.0634872
0.000760999	0.063466
0.000761999	0.0634447
0.000762999	0.0634023
0.000763999	0.0633705
0.000764999	0.0633546
0.000765999	0.0633387
0.000766999	0.0633122
0.000767999	0.0632803
0.000768999	0.0632538
0.000769999	0.063222
0.000770999	0.0631902
0.000771999	0.0631424
0.000772999	0.0630735
0.000773999	0.0630151
0.000774999	0.0629727
0.000775999	0.0629197
0.000776999	0.0628772
0.000777999	0.0628507
0.000778999	0.0628136
0.000779999	0.0627499
0.000780999	0.0626969
0.000782999	0.0626704
0.000783999	0.0626333
0.000784999	0.0626067
0.000785999	0.0625908
0.000786999	0.0625696
0.000787999	0.0625431
0.000788999	0.0624954
0.000789999	0.0624529
0.000790999	0.0624264
0.000791999	0.0624052
0.000792999	0.0623681
0.000793999	0.062315
0.000794999	0.0622726
0.000795999	0.0621983
0.000796999	0.0621294
0.000797999	0.0621029
0.000798999	0.0620764
0.000799999	0.0620392
0.000800999	0.0620021
0.000801999	0.0619809
0.000802999	0.0619385
0.000803999	0.0618854
0.000804999	0.0618642
0.000805999	0.061843
0.000806999	0.0618112
0.000807999	0.0617899
0.000808999	0.0617528
0.000809999	0.0617104
0.000810999	0.0616627
0.000811999	0.061599
0.000812999	0.061546
0.000813999	0.0615088
0.000815999	0.061477
0.000816999	0.0614505
0.000817999	0.061424
0.000819999	0.0613975
0.000820999	0.0613762
0.000821999	0.0613338
0.000822999	0.0612914
0.000823999	0.0612649
0.000824999	0.061233
0.000825999	0.06118
0.000826999	0.0611429
0.000828999	0.0611111
0.000829999	0.0610633
0.000830999	0.0610368
0.000831999	0.0610156
0.000832999	0.0609732
0.000833999	0.0609254
0.000834999	0.060883
0.000835999	0.0608406
0.000836999	0.0607981
0.000837999	0.0607663
0.000838999	0.0607451
0.000839999	0.0607133
0.000840999	0.0606708
0.000842999	0.0606443
0.000843999	0.0606072
0.000844999	0.0605541
0.000845999	0.0605064
0.000846999	0.060464
0.000847999	0.0604269
0.000848999	0.0603844
0.000849999	0.0603526
0.000850999	0.0603261
0.000851999	0.060289
0.000852999	0.0602571
0.000853999	0.0602306
0.000854999	0.0601988
0.000855999	0.0601617
0.000856999	0.0601192
0.000857999	0.0600874
0.000859999	0.0600715
0.000860999	0.0600291
0.000861999	0.059976
0.000862999	0.0599283
0.000863999	0.0598593
0.000864999	0.059801
0.000865999	0.0597745
0.000866999	0.0597374
0.000867999	0.0597002
0.000868999	0.0596843
0.000869999	0.0596472
0.000870999	0.0596101
0.000871999	0.0595835
0.000872999	0.0595411
0.000873999	0.0594934
0.000874999	0.0594616
0.000876999	0.0594403
0.000877999	0.0594191
0.000878999	0.0594032
0.000879999	0.0593714
0.000880999	0.059329
0.000881999	0.0593077
0.000882999	0.0592865
0.000883999	0.0592547
0.000884999	0.0592176
0.000885999	0.0591804
0.000886999	0.0591539
0.000887999	0.0591221
0.000888999	0.059085
0.000889999	0.0590585
0.000890999	0.0590266
0.000891999	0.0589842
0.000892999	0.0589524
0.000893999	0.0589312
0.000894999	0.058894
0.000895999	0.0588516
0.000897999	0.0588251
0.000899999	0.0588092
0.000900999	0.0587933
0.000901999	0.0587561
0.000902999	0.0587137
0.000903999	0.0586819
0.000904999	0.0586607
0.000905999	0.0586342
0.000906999	0.058597
0.000907999	0.0585599
0.000908999	0.0585228
0.000909999	0.0585016
0.000910999	0.058475
0.000911999	0.0584432
0.000912999	0.0584114
0.000913999	0.0583796
0.000914999	0.0583477
0.000915999	0.0583212
0.000916999	0.0583
0.000917999	0.0582629
0.000918999	0.0582258
0.000919999	0.0581939
0.000920999	0.0581621
0.000921999	0.0581197
0.000922999	0.0580879
0.000923999	0.0580507
0.000924999	0.0580136
0.000925999	0.0579818
0.000926999	0.0579393
0.000928999	0.0579022
0.000930999	0.0578651
0.000931999	0.057828
0.000932999	0.0577961
0.000933999	0.0577696
0.000934999	0.0577325
0.000935999	0.057706
0.000936999	0.0576954
0.000938999	0.0576742
0.000939999	0.057637
0.000940999	0.0576052
0.000941999	0.057584
0.000942999	0.0575628
0.000943999	0.0575363
0.000944999	0.0574938
0.000945999	0.057462
0.000946999	0.0574302
0.000948999	0.0573824
0.000949999	0.0573559
0.000950999	0.0573347
0.000951999	0.0572817
0.000952999	0.0572392
0.000953999	0.0572233
0.000954999	0.0572021
0.000955999	0.0571703
0.000956999	0.0571332
0.000957999	0.0571119
0.000958999	0.0571013
0.000959999	0.0570801
0.000960999	0.057043
0.000961999	0.0570006
0.000963999	0.0569687
0.000964999	0.0569369
0.000966999	0.0568998
0.000967999	0.0568627
0.000968999	0.0568361
0.000969999	0.0568255
0.000970999	0.0568096
0.000971999	0.0567937
0.000972999	0.0567778
0.000973999	0.0567513
0.000974999	0.0567248
0.000975999	0.0566982
0.000976999	0.056677
0.000977999	0.0566611
0.000978999	0.0566346
0.000979999	0.0566134
0.000980999	0.0566028
0.000981999	0.0565816
0.000982999	0.0565603
0.000984999	0.0565391
0.000985999	0.0565179
0.000986999	0.056502
0.000987999	0.0564702
0.000988999	0.056433
0.000989999	0.0564118
0.000990999	0.0563906
0.000991999	0.0563694
0.000993999	0.0563535
0.000994999	0.056327
0.000995999	0.0563058
0.000996999	0.0562845
0.000997999	0.0562527
0.000998999	0.0562156
0.000999999	0.0561785
0.001001	0.0561572
0.001002	0.056136
0.001003	0.0561148
0.001004	0.0560936
0.001005	0.0560724
0.001006	0.0560565
0.001007	0.0560406
0.001008	0.0560087
0.001009	0.0559557
0.00101	0.0559239
0.001012	0.0558921
0.001014	0.0558549
0.001015	0.0558337
0.001018	0.0558072
0.001019	0.0557807
0.00102	0.0557542
0.001021	0.0557329
0.001022	0.0557223
0.001023	0.0556905
0.001024	0.0556428
0.001027	0.0556003
0.001028	0.0555632
0.001029	0.055542
0.00103	0.0555208
0.001031	0.0554943
0.001032	0.0554731
0.001033	0.0554359
0.001035	0.0553882
0.001036	0.0553511
0.001037	0.0553192
0.001039	0.0552927
0.001041	0.0552768
0.001042	0.0552609
0.001043	0.055245
0.001044	0.0552185
0.001045	0.0551707
0.001046	0.0551336
0.001048	0.0551177
0.001049	0.0550912
0.00105	0.0550647
0.001051	0.0550487
0.001052	0.0550275
0.001053	0.0550116
0.001054	0.055001
0.001055	0.0549851
0.001056	0.0549692
0.001057	0.0549321
0.001058	0.0548737
0.001059	0.054826
0.00106	0.0547889
0.001061	0.0547517
0.001062	0.0547252
0.001064	0.0547146
0.001065	0.054704
0.001066	0.0546881
0.001067	0.0546669
0.001068	0.054651
0.00107	0.0546297
0.001071	0.0545979
0.001072	0.0545608
0.001073	0.0545237
0.001074	0.0545024
0.001075	0.0544865
0.001076	0.0544706
0.001077	0.0544547
0.001078	0.0544388
0.001079	0.0544176
0.001081	0.0543911
0.001082	0.0543698
0.001083	0.0543433
0.001084	0.0543115
0.001085	0.0542903
0.001087	0.0542532
0.001088	0.054216
0.001089	0.0542001
0.001091	0.0541789
0.001093	0.0541577
0.001094	0.0541418
0.001095	0.0541153
0.001096	0.0540887
0.001097	0.0540781
0.001098	0.0540675
0.001099	0.0540569
0.0011	0.0540251
0.001101	0.0539933
0.001102	0.0539668
0.001103	0.0539137
0.001104	0.0538713
0.001105	0.0538501
0.001106	0.0538342
0.001107	0.0538182
0.001108	0.0538023
0.00111	0.0537864
0.001111	0.0537493
0.001115	0.0537016
0.001116	0.0536538
0.001117	0.0536167
0.001118	0.0536008
0.00112	0.0535743
0.001123	0.0535318
0.001124	0.0534947
0.001125	0.0534629
0.001126	0.0534205
0.001127	0.053378
0.001128	0.0533462
0.001129	0.0533197
0.00113	0.0532932
0.001131	0.053272
0.001134	0.053256
0.001135	0.0532401
0.001136	0.0532295
0.001137	0.0532189
0.001138	0.053203
0.001139	0.0531818
0.00114	0.0531606
0.001141	0.0531181
0.001142	0.0530651
0.001143	0.0530386
0.001144	0.0530227
0.001145	0.0530068
0.001146	0.0529961
0.001147	0.0529749
0.001148	0.0529537
0.00115	0.0529325
0.001152	0.052906
0.001153	0.0528901
0.001154	0.0528795
0.001157	0.0528689
0.001159	0.0528582
0.00116	0.0528423
0.001161	0.0528211
0.001162	0.0527893
0.001164	0.0527469
0.001165	0.052715
0.001167	0.0526726
0.001168	0.0526302
0.001169	0.0526037
0.001171	0.0525718
0.001172	0.0525453
0.001173	0.0525294
0.001175	0.0525135
0.001176	0.0524923
0.001177	0.0524658
0.001178	0.0524392
0.001179	0.0524074
0.00118	0.0523756
0.001182	0.0523597
0.001183	0.0523491
0.001185	0.0523385
0.001186	0.0523226
0.001187	0.052296
0.001188	0.0522748
0.001189	0.0522536
0.00119	0.0522324
0.001191	0.0522165
0.001192	0.0522006
0.001193	0.05219
0.001194	0.0521687
0.001195	0.0521475
0.001196	0.0521316
0.001197	0.0521157
0.001198	0.0521051
0.001199	0.0520945
0.0012	0.0520839
0.001201	0.052068
0.001202	0.0520521
0.001203	0.0520308
0.001205	0.0520096
0.001206	0.051999
0.001207	0.0519778
0.001208	0.0519566
0.001209	0.051946
0.001211	0.0519354
0.001212	0.0519195
0.001213	0.0518929
0.001215	0.0518717
0.001216	0.0518611
0.001217	0.0518399
0.001218	0.0518187
0.001219	0.0517922
0.00122	0.0517657
0.001221	0.051755
0.001222	0.0517391
0.001224	0.0517232
0.001225	0.051702
0.001226	0.0516808
0.001227	0.0516596
0.001228	0.0516384
0.001229	0.0516225
0.001231	0.0516065
0.001232	0.0515747
0.001233	0.0515429
0.001235	0.0515217
0.001236	0.0514952
0.001237	0.0514686
0.001238	0.0514421
0.001239	0.0514209
0.00124	0.0513944
0.001241	0.0513626
0.001242	0.0513413
0.001243	0.0513307
0.001244	0.0513148
0.001245	0.0512989
0.001246	0.0512777
0.001247	0.0512459
0.001248	0.0512247
0.001249	0.0512141
0.00125	0.0511928
0.001253	0.0511663
0.001254	0.0511451
0.001255	0.0511292
0.001256	0.0511186
0.001257	0.0511027
0.001258	0.0510868
0.001259	0.0510762
0.001262	0.0510602
0.001264	0.051039
0.001266	0.0510178
0.001267	0.0510019
0.001268	0.0509913
0.001269	0.0509807
0.00127	0.0509701
0.001271	0.0509542
0.001272	0.0509276
0.001274	0.0508958
0.001275	0.0508587
0.001276	0.0508322
0.001277	0.050811
0.001283	0.0507844
0.001284	0.0507526
0.001286	0.0507208
0.001287	0.050689
0.001288	0.0506518
0.001289	0.05062
0.00129	0.0505882
0.001291	0.0505617
0.001293	0.0505458
0.001294	0.0505352
0.001295	0.0505192
0.001296	0.0505033
0.001297	0.0504768
0.001299	0.0504503
0.001302	0.0504397
0.001303	0.0504185
0.001304	0.0503973
0.001305	0.0503813
0.001306	0.0503601
0.001307	0.0503442
0.001308	0.050323
0.001309	0.0503018
0.001311	0.0502912
0.001313	0.05027
0.001314	0.0502488
0.001315	0.0502328
0.001316	0.0502169
0.001317	0.0502063
0.001318	0.0501957
0.001321	0.0501798
0.001322	0.0501639
0.001323	0.0501533
0.001325	0.0501162
0.001326	0.050079
0.001328	0.0500684
0.001329	0.0500525
0.00133	0.0500313
0.001331	0.0500048
0.001334	0.0499783
0.001335	0.049957
0.001336	0.0499305
0.001337	0.049904
0.001339	0.0498881
0.001341	0.0498775
0.001342	0.0498616
0.001344	0.0498457
0.001345	0.0498244
0.001347	0.0498032
0.001348	0.049782
0.001349	0.0497449
0.00135	0.0497184
0.001351	0.0496918
0.001353	0.0496653
0.001354	0.0496441
0.001355	0.0496229
0.001356	0.049607
0.001357	0.0495805
0.001358	0.0495539
0.001359	0.0495327
0.00136	0.0495168
0.001361	0.0495009
0.001362	0.049485
0.001363	0.0494744
0.001364	0.0494532
0.001365	0.049432
0.001366	0.049416
0.001367	0.0494001
0.001368	0.0493789
0.001369	0.0493577
0.00137	0.0493471
0.001371	0.0493365
0.001372	0.0493206
0.001373	0.0492994
0.001374	0.0492728
0.001375	0.0492463
0.001376	0.0492198
0.001377	0.0491933
0.001378	0.0491774
0.00138	0.0491668
0.001383	0.0491562
0.001386	0.0491455
0.001387	0.0491296
0.001388	0.0491084
0.001389	0.0490925
0.00139	0.0490766
0.001391	0.0490607
0.001392	0.0490501
0.001393	0.0490342
0.001394	0.0490183
0.001395	0.0489917
0.001396	0.0489652
0.001398	0.0489546
0.001399	0.048944
0.0014	0.0489228
0.001401	0.0489016
0.001402	0.048891
0.001404	0.0488751
0.001406	0.0488538
0.001407	0.0488273
0.00141	0.0488061
0.001411	0.0487849
0.001412	0.0487531
0.001413	0.0487318
0.001414	0.0487159
0.001416	0.0486947
0.001418	0.0486735
0.001419	0.0486523
0.00142	0.0486311
0.001421	0.0486046
0.001422	0.0485727
0.001423	0.0485462
0.001424	0.0485197
0.001426	0.0484879
0.001428	0.048456
0.001429	0.0484348
0.00143	0.0484189
0.001432	0.048403
0.001433	0.0483871
0.001434	0.0483394
0.001435	0.0482863
0.001437	0.0482598
0.001438	0.0482439
0.001441	0.048228
0.001442	0.0482121
0.001443	0.0481962
0.001444	0.0481749
0.001445	0.048159
0.001446	0.0481484
0.001447	0.0481007
0.001449	0.0480476
0.001451	0.0480264
0.001452	0.0480052
0.001453	0.0479893
0.001454	0.0479787
0.001455	0.0479681
0.001457	0.0479469
0.001458	0.0479257
0.001459	0.0479097
0.00146	0.0478885
0.001461	0.0478726
0.001462	0.047862
0.001464	0.0478514
0.001466	0.0478408
0.001467	0.0478196
0.001468	0.0477984
0.001469	0.0477878
0.001471	0.0477665
0.001472	0.0477453
0.001474	0.0477347
0.001475	0.0477135
0.001476	0.0476764
0.001478	0.0476393
0.001479	0.0476127
0.00148	0.0475915
0.001483	0.0475703
0.001484	0.0475491
0.001488	0.0475279
0.001489	0.0475067
0.00149	0.0474907
0.001491	0.0474748
0.001492	0.0474536
0.001493	0.0474377
0.001494	0.0474271
0.001496	0.0474165
0.001497	0.0473953
0.001498	0.0473688
0.001499	0.0473528
0.0015	0.0473422
0.001501	0.0473316
0.001503	0.0473104
0.001504	0.0472839
0.001505	0.0472574
0.001507	0.0472309
0.001508	0.0472149
0.001511	0.047199
0.001514	0.0471831
0.001515	0.0471672
0.001517	0.0471407
0.001518	0.0471142
0.00152	0.0470823
0.001521	0.0470558
0.001522	0.0470452
0.001523	0.0470346
0.001524	0.0470187
0.001525	0.0469922
0.001526	0.0469657
0.001527	0.0469498
0.001528	0.0469391
0.001529	0.0469285
0.00153	0.0469179
0.001531	0.046902
0.001532	0.0468861
0.001535	0.0468755
0.001536	0.0468596
0.001537	0.0468437
0.001538	0.0468278
0.001539	0.0468065
0.001542	0.0467853
0.001543	0.0467694
0.001544	0.0467588
0.001547	0.0467376
0.001548	0.0467164
0.001549	0.0467058
0.00155	0.046674
0.001552	0.0466421
0.001553	0.0466315
0.001555	0.0466209
0.001557	0.0465891
0.001558	0.0465573
0.00156	0.0465467
0.001561	0.0465307
0.001562	0.0465148
0.001563	0.0464936
0.001565	0.0464618
0.001566	0.0464353
0.001567	0.0464141
0.001569	0.0463982
0.00157	0.0463875
0.001571	0.0463769
0.001573	0.046361
0.001574	0.0463451
0.001575	0.0463345
0.001577	0.0463239
0.001578	0.0463133
0.00158	0.0462868
0.001581	0.0462602
0.001582	0.0462496
0.001583	0.0462337
0.001585	0.0462125
0.001586	0.0461913
0.001587	0.0461648
0.001588	0.0461436
0.00159	0.0461277
0.001591	0.0461064
0.001592	0.0460799
0.001594	0.0460587
0.001596	0.0460428
0.001597	0.0460163
0.001598	0.0459951
0.001599	0.0459844
0.0016	0.0459738
0.001601	0.0459632
0.001602	0.045942
0.001604	0.0459049
0.001605	0.0458731
0.001606	0.0458572
0.001607	0.0458306
0.001608	0.0457935
0.001609	0.045767
0.001611	0.0457511
0.001612	0.0457405
0.001614	0.0457193
0.001615	0.045698
0.001616	0.0456874
0.001618	0.0456768
0.001621	0.0456662
0.001622	0.0456344
0.001624	0.0455973
0.001626	0.0455761
0.001632	0.0455601
0.001633	0.0455495
0.001634	0.0455336
0.001635	0.0455071
0.001637	0.0454859
0.001638	0.0454753
0.001639	0.0454647
0.00164	0.0454488
0.001641	0.0454275
0.001642	0.0454063
0.001643	0.0453851
0.001644	0.0453692
0.001645	0.0453533
0.001647	0.0453321
0.001648	0.0453162
0.001649	0.0453056
0.00165	0.0452949
0.001652	0.0452737
0.001653	0.0452366
0.001654	0.0452048
0.001655	0.0451889
0.001656	0.0451783
0.001657	0.0451677
0.001659	0.0451517
0.00166	0.0451358
0.001661	0.0451252
0.001664	0.0451093
0.001665	0.0450828
0.001666	0.0450616
0.001667	0.0450457
0.00167	0.0450298
0.001676	0.0450085
0.001677	0.044982
0.00168	0.0449555
0.001681	0.0449343
0.001683	0.0449184
0.001684	0.0448972
0.001685	0.0448759
0.001686	0.0448547
0.001687	0.0448388
0.001688	0.0448229
0.001691	0.044807
0.001692	0.0447858
0.001693	0.0447646
0.001694	0.044754
0.001695	0.044738
0.001698	0.0447115
0.001699	0.0446903
0.001701	0.0446744
0.001702	0.0446585
0.001705	0.0446479
0.001707	0.0446373
0.001708	0.0446267
0.001709	0.0446107
0.00171	0.0445948
0.001711	0.0445842
0.001712	0.0445736
0.001714	0.044563
0.001715	0.0445524
0.001719	0.0445365
0.001723	0.0445206
0.001724	0.04451
0.001725	0.0444994
0.001726	0.0444888
0.001728	0.0444622
0.001729	0.0444304
0.00173	0.0444145
0.001731	0.0444039
0.001733	0.0443827
0.001734	0.0443562
0.001736	0.0443403
0.001737	0.0443296
0.001738	0.0443137
0.001741	0.0442978
0.001743	0.0442872
0.001745	0.0442713
0.001746	0.0442554
0.001747	0.0442395
0.001748	0.0442183
0.001751	0.0442024
0.001752	0.0441917
0.001753	0.0441811
0.001755	0.0441705
0.001756	0.0441599
0.001757	0.044144
0.001758	0.0441281
0.00176	0.0441175
0.001761	0.0440963
0.001766	0.0440751
0.001767	0.0440591
0.001768	0.0440432
0.001769	0.0440326
0.00177	0.0440167
0.001773	0.0440008
0.001774	0.0439902
0.001775	0.0439796
0.001776	0.0439637
0.001777	0.0439425
0.001779	0.0439159
0.00178	0.0438947
0.001782	0.0438735
0.001783	0.0438523
0.001786	0.0438417
0.001789	0.0438311
0.001791	0.0438152
0.001794	0.0437993
0.001795	0.0437833
0.001797	0.0437621
0.0018	0.0437462
0.001802	0.0437356
0.001803	0.0437144
0.001804	0.0436932
0.001805	0.0436826
0.001807	0.043672
0.001808	0.0436614
0.001812	0.0436401
0.001813	0.0436189
0.001816	0.0436083
0.001817	0.0435977
0.001821	0.0435871
0.001822	0.0435712
0.001824	0.0435447
0.001825	0.0435182
0.001827	0.0434969
0.00183	0.0434651
0.001835	0.0434333
0.001836	0.0434015
0.001838	0.043375
0.001839	0.0433537
0.001842	0.0433166
0.001843	0.0432848
0.001844	0.0432689
0.001845	0.0432583
0.001848	0.0432477
0.001849	0.0432371
0.001851	0.0432211
0.001853	0.0432052
0.001854	0.0431946
0.001855	0.043184
0.001856	0.0431681
0.001858	0.0431469
0.001863	0.0431204
0.001865	0.0430938
0.001866	0.0430779
0.001868	0.0430567
0.001869	0.0430302
0.001872	0.0430143
0.001873	0.0430037
0.001874	0.0429931
0.001876	0.0429825
0.001877	0.0429719
0.00188	0.0429613
0.001882	0.0429347
0.001886	0.0429082
0.00189	0.0428976
0.001891	0.042887
0.001894	0.0428711
0.001895	0.0428552
0.001896	0.042834
0.001897	0.0428074
0.001898	0.0427809
0.001899	0.0427597
0.001903	0.0427438
0.001904	0.0427279
0.001908	0.0427173
0.001909	0.0427014
0.00191	0.0426854
0.001911	0.0426748
0.001912	0.0426642
0.001913	0.0426536
0.001914	0.0426377
0.001917	0.0426218
0.001918	0.0426112
0.001919	0.0425953
0.001921	0.0425741
0.001922	0.0425582
0.001926	0.0425475
0.001927	0.0425369
0.001928	0.042521
0.001929	0.0424945
0.00193	0.0424733
0.001931	0.0424574
0.001935	0.0424415
0.001937	0.0424309
0.001938	0.042415
0.00194	0.042399
0.001941	0.0423831
0.001942	0.0423672
0.001944	0.0423566
0.001945	0.0423407
0.001946	0.0423195
0.001947	0.0423036
0.001948	0.0422877
0.00195	0.0422717
0.001951	0.0422558
0.001952	0.0422399
0.001953	0.0422187
0.001954	0.0421975
0.001957	0.0421816
0.001958	0.0421551
0.001959	0.0421338
0.00196	0.0421126
0.001964	0.0420914
0.001965	0.0420755
0.001966	0.0420596
0.001967	0.042049
0.001969	0.0420331
0.00197	0.0420172
0.001973	0.0419853
0.001976	0.0419429
0.001977	0.0419164
0.001978	0.0419005
0.001979	0.0418846
0.00198	0.0418687
0.001982	0.041858
0.001986	0.0418368
0.001988	0.0418156
0.001993	0.041805
0.001994	0.0417891
0.001996	0.0417732
0.001999	0.0417626
0.002	0.041752
0.002001	0.0417361
0.002003	0.0417201
0.002004	0.0416989
0.002007	0.0416724
0.002013	0.0416565
0.002015	0.0416459
0.002018	0.0416353
0.00202	0.0416194
0.002021	0.0415982
0.002022	0.0415769
0.002023	0.0415557
0.002024	0.0415345
0.002025	0.0415186
0.002026	0.0414974
0.002027	0.0414762
0.002028	0.041455
0.002029	0.0414337
0.00203	0.0414231
0.002032	0.0414125
0.002034	0.0414019
0.002039	0.0413913
0.002041	0.0413807
0.002042	0.0413701
0.002044	0.0413489
0.002046	0.0413277
0.002047	0.0413171
0.002048	0.0413064
0.002049	0.0412958
0.002053	0.0412799
0.002054	0.0412587
0.002057	0.0412428
0.002059	0.0412322
0.002061	0.0412216
0.002063	0.041211
0.002065	0.0411898
0.002066	0.0411632
0.002067	0.0411473
0.002069	0.0411367
0.002071	0.0411261
0.002072	0.0411155
0.002075	0.0411049
0.002077	0.0410943
0.002078	0.0410837
0.002079	0.0410731
0.00208	0.0410625
0.002081	0.0410519
0.002083	0.0410359
0.002086	0.04102
0.002092	0.0410094
0.002093	0.0409829
0.002094	0.0409564
0.002096	0.0409405
0.002097	0.0409193
0.002098	0.040898
0.002099	0.0408821
0.002101	0.0408715
0.002102	0.0408556
0.002103	0.0408397
0.002104	0.0408291
0.002106	0.0408132
0.002108	0.0407973
0.00211	0.0407761
0.002112	0.0407442
0.002113	0.040723
0.002114	0.0407124
0.002117	0.0407018
0.00212	0.0406912
0.002122	0.0406806
0.002126	0.04067
0.002129	0.0406594
0.002131	0.0406488
0.002132	0.0406382
0.002133	0.0406222
0.002135	0.040601
0.002137	0.0405851
0.002138	0.0405692
0.00214	0.040548
0.002141	0.0405321
0.002144	0.0405215
0.002145	0.0405109
0.002149	0.0405003
0.00215	0.0404897
0.002151	0.040479
0.002153	0.0404684
0.002154	0.0404578
0.002157	0.0404472
0.002158	0.0404313
0.002159	0.0404101
0.002161	0.0403942
0.002162	0.0403836
0.002164	0.040373
0.002167	0.0403624
0.002169	0.0403518
0.00217	0.0403411
0.002171	0.0403305
0.002173	0.0403199
0.002174	0.0403093
0.002176	0.0402987
0.002177	0.0402828
0.002178	0.0402669
0.00218	0.0402563
0.002181	0.0402404
0.002182	0.0402192
0.002184	0.0402032
0.002186	0.0401926
0.002187	0.0401767
0.002194	0.0401608
0.002195	0.0401502
0.002196	0.0401396
0.002197	0.040129
0.0022	0.0401184
0.002205	0.0401025
0.002206	0.0400813
0.002209	0.0400653
0.00221	0.0400547
0.002213	0.0400441
0.002216	0.0400335
0.002218	0.0400229
0.002219	0.0399964
0.002221	0.0399699
0.002225	0.0399593
0.002226	0.0399434
0.00223	0.0399274
0.002232	0.0399062
0.002233	0.039885
0.002234	0.0398744
0.002235	0.0398638
0.002236	0.0398479
0.002237	0.0398267
0.002238	0.0398108
0.002239	0.0398002
0.00224	0.0397789
0.002241	0.0397577
0.002242	0.0397471
0.002243	0.0397312
0.002244	0.03971
0.002245	0.0396941
0.002247	0.0396835
0.002249	0.0396729
0.00225	0.0396623
0.002251	0.0396516
0.002252	0.039641
0.002254	0.0396251
0.002258	0.0396092
0.002259	0.0395986
0.00226	0.0395827
0.00227	0.0395668
0.002271	0.0395562
0.002273	0.0395456
0.002274	0.0395297
0.002275	0.0395137
0.002276	0.0395031
0.002279	0.0394872
0.002283	0.0394713
0.002285	0.0394554
0.002286	0.0394395
0.002288	0.0394289
0.002289	0.0394183
0.002291	0.0394077
0.002292	0.0393971
0.002296	0.0393864
0.002298	0.0393705
0.002299	0.0393546
0.002305	0.039344
0.002314	0.0393334
0.002315	0.0393228
0.002318	0.0393122
0.002322	0.0393016
0.002323	0.039291
0.002324	0.0392804
0.002328	0.0392698
0.002331	0.0392592
0.002332	0.0392432
0.002333	0.0392273
0.002334	0.0392167
0.002335	0.0392061
0.002336	0.0391849
0.002337	0.0391584
0.002338	0.0391425
0.002339	0.0391319
0.002342	0.0391213
0.002343	0.0391053
0.002344	0.0390894
0.002348	0.0390735
0.002349	0.0390523
0.002352	0.0390364
0.002353	0.0390205
0.002354	0.038994
0.002356	0.0389727
0.002357	0.0389621
0.002358	0.0389515
0.002361	0.0389356
0.002362	0.0389197
0.002363	0.0389091
0.002364	0.0388985
0.002366	0.0388879
0.002367	0.0388667
0.002368	0.0388402
0.002369	0.0388242
0.00237	0.0388136
0.002372	0.038803
0.002375	0.0387818
0.00238	0.0387553
0.002381	0.0387394
0.002385	0.0387288
0.002386	0.0387129
0.002387	0.0386969
0.002388	0.038681
0.002389	0.0386598
0.00239	0.0386439
0.002392	0.0386227
0.002393	0.0386015
0.002395	0.0385909
0.002398	0.0385803
0.0024	0.0385697
0.002401	0.0385537
0.002403	0.0385325
0.002408	0.0385166
0.002412	0.0384954
0.002414	0.0384742
0.002417	0.0384636
0.002422	0.0384477
0.002423	0.0384158
0.002428	0.0383893
0.002429	0.0383787
0.002432	0.0383681
0.002434	0.0383575
0.00244	0.0383469
0.002441	0.0383363
0.002442	0.0383151
0.002443	0.0382939
0.002445	0.0382832
0.002449	0.0382726
0.00245	0.038262
0.002452	0.0382514
0.002455	0.0382408
0.002457	0.0382302
0.002458	0.038209
0.002461	0.0381878
0.002462	0.0381719
0.002463	0.038156
0.002464	0.03814
0.002465	0.0381241
0.002466	0.0381135
0.002467	0.0381029
0.00247	0.0380923
0.002472	0.0380817
0.002477	0.0380711
0.002478	0.0380605
0.002481	0.0380499
0.002483	0.0380393
0.002485	0.0380234
0.002486	0.0380074
0.002487	0.0379968
0.002491	0.0379756
0.002494	0.0379544
0.002495	0.0379438
0.002496	0.0379332
0.002499	0.0379226
0.0025	0.037912
0.002502	0.0379014
0.002503	0.0378855
0.002505	0.0378695
0.002507	0.0378589
0.002509	0.0378483
0.00251	0.0378377
0.002511	0.0378271
0.002512	0.0378059
0.002513	0.0377847
0.002514	0.0377741
0.002516	0.0377635
0.002519	0.0377529
0.002524	0.0377369
0.002526	0.037721
0.002527	0.0377104
0.002529	0.0376998
0.002531	0.0376892
0.002537	0.0376786
0.002538	0.037668
0.002539	0.0376574
0.002542	0.0376468
0.002545	0.0376309
0.002547	0.037615
0.002548	0.0376044
0.002552	0.0375937
0.002554	0.0375831
0.002557	0.0375725
0.002558	0.0375619
0.002559	0.0375407
0.00256	0.0375195
0.002561	0.0375089
0.002563	0.0374983
0.002567	0.0374877
0.002568	0.0374771
0.002569	0.0374611
0.00257	0.0374452
0.002572	0.0374346
0.002573	0.037424
0.002574	0.0374081
0.002576	0.0373922
0.002577	0.0373816
0.002578	0.037371
0.002579	0.0373604
0.00258	0.0373498
0.002582	0.0373339
0.002584	0.0373179
0.002585	0.0373073
0.002586	0.0372967
0.002589	0.0372808
0.002591	0.0372649
[truncated: 3,293 more rows]

## Sheet: s=0.05
0	0.993935
9.99999e-07	0.852706
2e-06	0.663916
3e-06	0.57611
4e-06	0.519279
5e-06	0.47905
5.99999e-06	0.447931
6.99999e-06	0.423041
7.99999e-06	0.402666
8.99999e-06	0.385677
9.99999e-06	0.371196
1.1e-05	0.358984
1.2e-05	0.347857
1.3e-05	0.337596
1.4e-05	0.328413
1.5e-05	0.320141
1.6e-05	0.312536
1.7e-05	0.305584
1.8e-05	0.298971
1.9e-05	0.29266
2e-05	0.286934
2.1e-05	0.281659
2.2e-05	0.276772
2.3e-05	0.272158
2.4e-05	0.267737
2.5e-05	0.263667
2.6e-05	0.259793
2.7e-05	0.255947
2.8e-05	0.252457
2.9e-05	0.249143
3e-05	0.245801
3.1e-05	0.242738
3.2e-05	0.239818
3.3e-05	0.236964
3.4e-05	0.23429
3.5e-05	0.231693
3.6e-05	0.22926
3.7e-05	0.226987
3.8e-05	0.224571
3.9e-05	0.222051
4e-05	0.219848
4.1e-05	0.217733
4.2e-05	0.215668
4.3e-05	0.213778
4.4e-05	0.21192
4.5e-05	0.210052
4.6e-05	0.208277
4.7e-05	0.206606
4.8e-05	0.20493
4.9e-05	0.203314
5e-05	0.201703
5.09999e-05	0.200163
5.19999e-05	0.198602
5.29999e-05	0.19698
5.39999e-05	0.19549
5.49999e-05	0.194153
5.59999e-05	0.1928
5.69999e-05	0.191534
5.79999e-05	0.19028
5.89999e-05	0.188883
5.99999e-05	0.187557
6.09999e-05	0.18628
6.19999e-05	0.185075
6.29999e-05	0.183979
6.39999e-05	0.182747
6.49999e-05	0.181662
6.59999e-05	0.180763
6.69999e-05	0.179662
6.79999e-05	0.178544
6.89999e-05	0.177503
6.99999e-05	0.176473
7.09999e-05	0.175476
7.19999e-05	0.174545
7.29999e-05	0.173745
7.39999e-05	0.172923
7.49999e-05	0.172014
7.59999e-05	0.171137
7.69999e-05	0.170277
7.79999e-05	0.169483
7.89999e-05	0.168727
7.99999e-05	0.168053
8.09999e-05	0.167335
8.19999e-05	0.166469
8.29999e-05	0.165659
8.39999e-05	0.16499
8.49999e-05	0.164388
8.59999e-05	0.163719
8.69999e-05	0.163018
8.79999e-05	0.162322
8.89999e-05	0.161632
8.99999e-05	0.160914
9.09999e-05	0.160218
9.19999e-05	0.159539
9.29999e-05	0.15881
9.39999e-05	0.15806
9.49999e-05	0.157326
9.59999e-05	0.156712
9.69999e-05	0.156087
9.79999e-05	0.155474
9.89999e-05	0.15492
9.99999e-05	0.15434
0.000101	0.153742
0.000102	0.153162
0.000103	0.152592
0.000104	0.151989
0.000105	0.15143
0.000106	0.150915
0.000107	0.150329
0.000108	0.149699
0.000109	0.149146
0.00011	0.148642
0.000111	0.148127
0.000112	0.147623
0.000113	0.147206
0.000114	0.146763
0.000115	0.146264
0.000116	0.145793
0.000117	0.145283
0.000118	0.144703
0.000119	0.144193
0.00012	0.143727
0.000121	0.143185
0.000122	0.142697
0.000123	0.142292
0.000124	0.141898
0.000125	0.14141
0.000126	0.140966
0.000127	0.140605
0.000128	0.14021
0.000129	0.139799
0.00013	0.139355
0.000131	0.138939
0.000132	0.138517
0.000133	0.13809
0.000134	0.137734
0.000135	0.137378
0.000136	0.136961
0.000137	0.136578
0.000138	0.136183
0.000139	0.135783
0.00014	0.1354
0.000141	0.135027
0.000142	0.134666
0.000143	0.134249
0.000144	0.133877
0.000145	0.133526
0.000146	0.133154
0.000147	0.13277
0.000148	0.132398
0.000149	0.13202
0.00015	0.131603
0.000151	0.131231
0.000152	0.130864
0.000153	0.130491
0.000154	0.130124
0.000155	0.129801
0.000156	0.129483
0.000157	0.129176
0.000158	0.128853
0.000159	0.128497
0.00016	0.128157
0.000161	0.12785
0.000162	0.127653
0.000163	0.127368
0.000164	0.127039
0.000165	0.126749
0.000166	0.12642
0.000167	0.126092
0.000168	0.125774
0.000169	0.125494
0.00017	0.125204
0.000171	0.124864
0.000172	0.124552
0.000173	0.124267
0.000174	0.123977
0.000175	0.123659
0.000176	0.123336
0.000177	0.123035
0.000178	0.122772
0.000179	0.122509
0.00018	0.122213
0.000181	0.121917
0.000182	0.121687
0.000183	0.121473
0.000184	0.121194
0.000185	0.120969
0.000186	0.12075
0.000187	0.12046
0.000188	0.120131
0.000189	0.11989
0.00019	0.119725
0.000191	0.11949
0.000192	0.11921
0.000193	0.118947
0.000194	0.118695
0.000195	0.118443
0.000196	0.118224
0.000197	0.118005
0.000198	0.117764
0.000199	0.117534
0.0002	0.117293
0.000201	0.117074
0.000202	0.116887
0.000203	0.116701
0.000204	0.116471
0.000205	0.11617
0.000206	0.115912
0.000207	0.115688
0.000208	0.115463
0.000209	0.115304
0.00021	0.11514
0.000211	0.114915
0.000212	0.114663
0.000213	0.114433
0.000214	0.114269
0.000215	0.114115
0.000216	0.113934
0.000217	0.113726
0.000218	0.113518
0.000219	0.113321
0.00022	0.113156
0.000221	0.112987
0.000222	0.112817
0.000223	0.112652
0.000224	0.112444
0.000225	0.112225
0.000226	0.112011
0.000227	0.111864
0.000228	0.111672
0.000229	0.111436
0.00023	0.11125
0.000231	0.111118
0.000232	0.111003
0.000233	0.110812
0.000234	0.110587
0.000235	0.110401
0.000236	0.110247
0.000237	0.110094
0.000238	0.109913
0.000239	0.109705
0.00024	0.109486
0.000241	0.10925
0.000242	0.109069
0.000243	0.108954
0.000244	0.108763
0.000245	0.108516
0.000246	0.108313
0.000247	0.108143
0.000248	0.107974
0.000249	0.107793
0.00025	0.107629
0.000251	0.107437
0.000252	0.10725
0.000253	0.107092
0.000254	0.106916
0.000255	0.106752
0.000256	0.106593
0.000257	0.106423
0.000258	0.106259
0.000259	0.106105
0.00026	0.105925
0.000261	0.105716
0.000262	0.105536
0.000263	0.105388
0.000264	0.105223
0.000265	0.105043
0.000266	0.104906
0.000267	0.104791
0.000268	0.104648
0.000269	0.104522
0.00027	0.104413
0.000271	0.10427
0.000272	0.1041
0.000273	0.103958
0.000274	0.103837
0.000275	0.103722
0.000276	0.103574
0.000277	0.103404
0.000278	0.103251
0.000279	0.103103
0.00028	0.102955
0.000281	0.102824
0.000282	0.102731
0.000283	0.102643
0.000284	0.102511
0.000285	0.102353
0.000286	0.102232
0.000287	0.102106
0.000288	0.101936
0.000289	0.101777
0.00029	0.101624
0.000291	0.101481
0.000292	0.101355
0.000293	0.101213
0.000294	0.101032
0.000295	0.100862
0.000296	0.100753
0.000297	0.100638
0.000298	0.100468
0.000299	0.100309
0.0003	0.100216
0.000301	0.100073
0.000302	0.0998652
0.000303	0.0996899
0.000304	0.0995255
0.000305	0.0993338
0.000306	0.0991804
0.000307	0.0990599
0.000308	0.0989174
0.000309	0.0987366
0.00031	0.0985723
0.000311	0.0983915
0.000312	0.0982161
0.000313	0.0981285
0.000314	0.0980627
0.000315	0.097986
0.000316	0.097871
0.000317	0.0977066
0.000318	0.0975477
0.000319	0.0974217
0.00032	0.0972957
0.000321	0.0971752
0.000322	0.0970656
0.000323	0.096967
0.000324	0.0968465
0.000325	0.0967314
0.000326	0.0966164
0.000327	0.096452
0.000328	0.0963205
0.000329	0.0962383
0.00033	0.0961671
0.000331	0.0960904
0.000332	0.0959863
0.000333	0.0958768
0.000334	0.0957672
0.000335	0.0956357
0.000336	0.0955316
0.000337	0.0954659
0.000338	0.0953837
0.000339	0.0952577
0.00034	0.0951262
0.000341	0.0950385
0.000342	0.0949673
0.000343	0.0948796
0.000344	0.0947427
0.000345	0.0946167
0.000346	0.0945126
0.000347	0.0944304
0.000348	0.0943482
0.000349	0.0942277
0.00035	0.0941345
0.000351	0.0940688
0.000352	0.0939757
0.000353	0.0938661
0.000354	0.0937949
0.000355	0.0937236
0.000356	0.0936524
0.000357	0.0935812
0.000358	0.093499
0.000359	0.0933785
0.00036	0.0932196
0.000361	0.0931155
0.000362	0.0930388
0.000363	0.0929292
0.000364	0.0927813
0.000365	0.0926443
0.000366	0.0925676
0.000367	0.0924964
0.000368	0.0924252
0.000369	0.0923594
0.00037	0.0922608
0.000371	0.0921677
0.000372	0.092091
0.000373	0.0920088
0.000374	0.0918828
0.000375	0.0917677
0.000376	0.0917075
0.000377	0.0916143
0.000378	0.0915212
0.000379	0.091439
0.00038	0.0913623
0.000381	0.0912747
0.000382	0.0911377
0.000383	0.0910226
0.000384	0.0908912
0.000385	0.0907487
0.000386	0.0906391
0.000387	0.0905077
0.000388	0.0903652
0.000389	0.0902556
0.00039	0.0901789
0.000391	0.0900748
0.000392	0.0899707
0.000393	0.0898995
0.000394	0.0898064
0.000395	0.0897078
0.000396	0.0896092
0.000397	0.0894996
0.000398	0.0894064
0.000399	0.0893133
0.0004	0.0892092
0.000401	0.0891325
0.000402	0.0890777
0.000403	0.089001
0.000404	0.0889353
0.000405	0.088875
0.000406	0.0887764
0.000407	0.0886723
0.000408	0.0885901
0.000409	0.0885079
0.00041	0.0883929
0.000411	0.0882778
0.000412	0.0881957
0.000413	0.0881244
0.000414	0.0880642
0.000415	0.0879929
0.000416	0.0879108
0.000417	0.0878286
0.000418	0.0877464
0.000419	0.0876368
0.00042	0.0875382
0.000421	0.0874506
0.000422	0.0873465
0.000423	0.0872424
0.000424	0.0871437
0.000425	0.0870725
0.000426	0.0869958
0.000427	0.0869136
0.000428	0.086826
0.000429	0.0867548
0.00043	0.0867109
0.000431	0.0866342
0.000432	0.0865192
0.000433	0.0864206
0.000434	0.0863384
0.000435	0.0862672
0.000436	0.086185
0.000437	0.0860918
0.000438	0.0860097
0.000439	0.0859165
0.00044	0.0858398
0.000441	0.0857741
0.000442	0.0856919
0.000443	0.0856152
0.000444	0.085544
0.000445	0.0854728
0.000446	0.0853961
0.000447	0.0853303
0.000448	0.0852865
0.000449	0.0852372
0.00045	0.0851495
0.000451	0.0850454
0.000452	0.0849632
0.000453	0.0848537
0.000454	0.084755
0.000455	0.0846893
0.000456	0.0846236
0.000457	0.0845852
0.000458	0.0845469
0.000459	0.0844702
0.00046	0.084377
0.000461	0.0843113
0.000462	0.0842674
0.000463	0.0842181
0.000464	0.084136
0.000465	0.0840428
0.000466	0.0839497
0.000467	0.083862
0.000468	0.0837853
0.000469	0.0836977
0.00047	0.08361
0.000471	0.0835607
0.000472	0.0835278
0.000473	0.0834621
0.000474	0.0833909
0.000475	0.0833306
0.000476	0.0832484
0.000477	0.0831553
0.000478	0.0830621
0.000479	0.08298
0.00048	0.0829471
0.000481	0.0829142
0.000482	0.0828539
0.000483	0.0827827
0.000484	0.082717
0.000485	0.0826458
0.000486	0.0825581
0.000487	0.0824869
0.000488	0.0824376
0.000489	0.0823883
0.00049	0.0823554
0.000491	0.0823116
0.000492	0.0822075
0.000493	0.0821143
0.000494	0.0820541
0.000495	0.0819883
0.000496	0.0819281
0.000497	0.0818733
0.000498	0.081813
0.000499	0.0817637
0.0005	0.0817199
0.000500999	0.0816651
0.000501999	0.0816048
0.000502999	0.08155
0.000503999	0.0815172
0.000504999	0.0814624
0.000505999	0.0813747
0.000506999	0.0812816
0.000507999	0.0812158
0.000508999	0.081161
0.000509999	0.0810843
0.000510999	0.0809693
0.000511999	0.0808652
0.000512999	0.0808214
0.000513999	0.080783
0.000514999	0.0807282
0.000515999	0.0806625
0.000516999	0.0805967
0.000517999	0.0805365
0.000518999	0.0804872
0.000519999	0.0804379
0.000520999	0.0803831
0.000521999	0.0803283
0.000522999	0.0802461
0.000523999	0.0801584
0.000524999	0.0800872
0.000525999	0.0800215
0.000526999	0.0799667
0.000527999	0.0799119
0.000528999	0.0798407
0.000529999	0.0797749
0.000530999	0.0797201
0.000531999	0.0796544
0.000532999	0.0795832
0.000533999	0.079501
0.000534999	0.0794243
0.000535999	0.079364
0.000536999	0.0792983
0.000537999	0.0792271
0.000538999	0.0791887
0.000539999	0.0791394
0.000540999	0.0790737
0.000541999	0.0790353
0.000542999	0.078986
0.000543999	0.0789203
0.000544999	0.078849
0.000545999	0.0788052
0.000546999	0.0787778
0.000547999	0.078734
0.000548999	0.0786737
0.000549999	0.0786135
0.000550999	0.0785587
0.000551999	0.0784984
0.000552999	0.0784436
0.000553999	0.0783888
0.000554999	0.0783286
0.000555999	0.0782683
0.000556999	0.0781861
0.000557999	0.078093
0.000558999	0.0780382
0.000559999	0.0779944
0.000560999	0.0779122
0.000561999	0.0778355
0.000562999	0.0777807
0.000563999	0.077715
0.000564999	0.0776711
0.000565999	0.0776109
0.000566999	0.0775342
0.000567999	0.0774739
0.000568999	0.0774301
0.000569999	0.0773808
0.000570999	0.0773095
0.000571999	0.0772602
0.000572999	0.0772219
0.000573999	0.0771726
0.000574999	0.0771178
0.000575999	0.077052
0.000576999	0.0769753
0.000577999	0.0769041
0.000578999	0.0768493
0.000579999	0.0768055
0.000580999	0.0767562
0.000581999	0.0766685
0.000582999	0.0765809
0.000583999	0.0765316
0.000584999	0.0764987
0.000585999	0.0764549
0.000586999	0.0763946
0.000587999	0.0763562
0.000588999	0.0762905
0.000589999	0.0762193
0.000590999	0.0761919
0.000591999	0.0761645
0.000592999	0.0761261
0.000593999	0.0760933
0.000594999	0.0760659
0.000595999	0.0760111
0.000596999	0.0759563
0.000597999	0.075896
0.000598999	0.0758193
0.000599999	0.0757481
0.000600999	0.0756878
0.000601999	0.075644
0.000602999	0.0756002
0.000603999	0.0755673
0.000604999	0.075529
0.000605999	0.0754742
0.000606999	0.0754194
0.000607999	0.0753646
0.000608999	0.0752989
0.000609999	0.0752331
0.000610999	0.0751729
0.000611999	0.0751181
0.000612999	0.0750797
0.000613999	0.0750085
0.000614999	0.0749318
0.000615999	0.0748825
0.000616999	0.0748441
0.000617999	0.0748113
0.000618999	0.0747784
0.000619999	0.074751
0.000620999	0.0747072
0.000621999	0.0746359
0.000622999	0.0745647
0.000623999	0.0745099
0.000624999	0.0744661
0.000625999	0.0744223
0.000626999	0.074373
0.000627999	0.0743346
0.000628999	0.0742963
0.000629999	0.0742579
0.000630999	0.0742086
0.000631999	0.0741538
0.000632999	0.0741045
0.000633999	0.0740662
0.000634999	0.0740333
0.000635999	0.0739785
0.000636999	0.0739237
0.000637999	0.0738689
0.000638999	0.0738251
0.000639999	0.0737922
0.000640999	0.0737539
0.000641999	0.073721
0.000642999	0.0736662
0.000643999	0.0736224
0.000644999	0.0736005
0.000645999	0.0735402
0.000646999	0.0734745
0.000647999	0.0734361
0.000648999	0.0734087
0.000649999	0.0733813
0.000650999	0.0733594
0.000651999	0.0733101
0.000652999	0.0732498
0.000653999	0.073217
0.000654999	0.0731841
0.000655999	0.0731403
0.000656999	0.0730745
0.000657999	0.0730307
0.000658999	0.0730088
0.000659999	0.0729595
0.000660999	0.0728992
0.000661999	0.0728663
0.000662999	0.0728389
0.000663999	0.0727842
0.000664999	0.0727348
0.000665999	0.0727074
0.000666999	0.0726691
0.000667999	0.0726307
0.000668999	0.0726034
0.000669999	0.072565
0.000670999	0.0725267
0.000671999	0.0724993
0.000672999	0.0724664
0.000673999	0.072439
0.000674999	0.0723952
0.000675999	0.0723459
0.000676999	0.0723239
0.000677999	0.0722856
0.000678999	0.0722308
0.000679999	0.0721925
0.000680999	0.0721541
0.000681999	0.0721103
0.000682999	0.0720829
0.000683999	0.0720555
0.000684999	0.0720117
0.000685999	0.0719569
0.000686999	0.0718966
0.000687999	0.0718418
0.000688999	0.0718089
0.000689999	0.0717761
0.000690999	0.0717487
0.000691999	0.0716829
0.000692999	0.0716062
0.000693999	0.0715734
0.000694999	0.0715405
0.000695999	0.0715021
0.000696999	0.0714419
0.000697999	0.0713816
0.000698999	0.0713542
0.000699999	0.0713433
0.000700999	0.0712994
0.000701999	0.0712501
0.000702999	0.0712008
0.000703999	0.071157
0.000704999	0.0711296
0.000705999	0.0711022
0.000706999	0.0710803
0.000707999	0.0710529
0.000708999	0.0710365
0.000710999	0.0710255
0.000711999	0.0710091
0.000712999	0.0709707
0.000713999	0.0709214
0.000714999	0.0708666
0.000715999	0.0708118
0.000716999	0.0707516
0.000717999	0.0706858
0.000718999	0.0706475
0.000719999	0.0706146
0.000720999	0.0705817
0.000721999	0.0705379
0.000722999	0.0704886
0.000723999	0.0704667
0.000724999	0.0704502
0.000725999	0.0704283
0.000726999	0.0703955
0.000727999	0.0703516
0.000728999	0.0703187
0.000729999	0.0702914
0.000730999	0.070264
0.000731999	0.0702092
0.000732999	0.070138
0.000733999	0.0701051
0.000734999	0.0700558
0.000735999	0.0699791
0.000736999	0.0699298
0.000737999	0.069875
0.000738999	0.0698311
0.000739999	0.0698092
0.000740999	0.0697818
0.000741999	0.0697599
0.000742999	0.069738
0.000743999	0.0696997
0.000744999	0.0696504
0.000745999	0.0696175
0.000746999	0.0695956
0.000747999	0.0695463
0.000748999	0.0694915
0.000749999	0.0694586
0.000750999	0.0694312
0.000751999	0.0694038
0.000752999	0.0693655
0.000753999	0.0693271
0.000754999	0.0692942
0.000755999	0.0692504
0.000756999	0.0691847
0.000757999	0.0691354
0.000758999	0.069108
0.000759999	0.0690806
0.000760999	0.0690532
0.000761999	0.0690203
0.000762999	0.0689929
0.000763999	0.068971
0.000764999	0.0689326
0.000765999	0.0688943
0.000766999	0.0688614
0.000767999	0.0688286
0.000768999	0.0687847
0.000769999	0.068719
0.000770999	0.0686532
0.000771999	0.0686149
0.000773999	0.0685984
0.000774999	0.0685711
0.000775999	0.0685272
0.000776999	0.0684834
0.000777999	0.0684505
0.000778999	0.0684231
0.000779999	0.0683957
0.000780999	0.0683738
0.000781999	0.0683519
0.000782999	0.068319
0.000783999	0.0682862
0.000784999	0.0682478
0.000785999	0.0681985
0.000786999	0.0681602
0.000787999	0.0681163
0.000788999	0.068067
0.000789999	0.0680287
0.000790999	0.0679794
0.000791999	0.067941
0.000792999	0.0679191
0.000793999	0.0678862
0.000795999	0.067826
0.000796999	0.0677712
0.000797999	0.0677164
0.000798999	0.0676452
0.000799999	0.0675849
0.000800999	0.0675191
0.000801999	0.0674698
0.000802999	0.0674424
0.000803999	0.0674205
0.000804999	0.0674041
0.000805999	0.0673712
0.000806999	0.0673384
0.000807999	0.0673219
0.000808999	0.0673055
0.000809999	0.0672836
0.000811999	0.0672617
0.000812999	0.0672288
0.000813999	0.0671904
0.000814999	0.0671521
0.000815999	0.0671137
0.000816999	0.0670918
0.000817999	0.0670644
0.000818999	0.0670315
0.000819999	0.0669932
0.000820999	0.0669548
0.000821999	0.0669384
0.000823999	0.066911
0.000824999	0.0668836
0.000825999	0.0668727
0.000827999	0.0668398
0.000828999	0.0668014
0.000829999	0.066785
0.000830999	0.066774
0.000831999	0.0667576
0.000832999	0.0667357
0.000833999	0.0667028
0.000834999	0.0666645
0.000835999	0.0666371
0.000836999	0.0665933
0.000837999	0.0665439
0.000838999	0.066522
0.000839999	0.0665056
0.000840999	0.0664672
0.000842999	0.0664125
0.000843999	0.0663741
0.000844999	0.0663577
0.000845999	0.0663358
0.000846999	0.0663029
0.000848999	0.0662645
0.000850999	0.0662262
0.000851999	0.0661933
0.000852999	0.0661659
0.000853999	0.0661385
0.000854999	0.0661166
0.000855999	0.0660837
0.000859999	0.0660509
0.000860999	0.0660344
0.000861999	0.0659906
0.000862999	0.0659413
0.000863999	0.0659139
0.000864999	0.065881
0.000865999	0.0658372
0.000866999	0.0657988
0.000867999	0.0657605
0.000868999	0.0657276
0.000869999	0.0656948
0.000870999	0.0656564
0.000871999	0.0656016
0.000872999	0.0655468
0.000873999	0.065492
0.000874999	0.0654427
0.000876999	0.0654044
0.000877999	0.0653715
0.000878999	0.0653551
0.000879999	0.0653277
0.000880999	0.0653058
0.000881999	0.0652784
0.000882999	0.0652455
0.000883999	0.0652181
0.000884999	0.0651907
0.000885999	0.0651688
0.000886999	0.0651414
0.000887999	0.065114
0.000888999	0.0650976
0.000889999	0.0650592
0.000890999	0.0650044
0.000891999	0.0649551
0.000892999	0.0649113
0.000893999	0.0648894
0.000894999	0.0648784
0.000895999	0.0648456
0.000896999	0.0647962
0.000897999	0.0647524
0.000898999	0.0647195
0.000899999	0.0646922
0.000900999	0.0646702
0.000901999	0.0646538
0.000903999	0.0646264
0.000904999	0.064599
0.000905999	0.0645716
0.000906999	0.0645442
0.000907999	0.0645278
0.000908999	0.0645059
0.000909999	0.0644675
0.000910999	0.0644401
0.000911999	0.0644182
0.000912999	0.0643853
0.000913999	0.0643634
0.000914999	0.064336
0.000915999	0.0642977
0.000916999	0.0642758
0.000918999	0.0642429
0.000919999	0.0641991
0.000920999	0.0641662
0.000921999	0.0641388
0.000922999	0.0641169
0.000923999	0.064084
0.000924999	0.0640457
0.000925999	0.0640238
0.000926999	0.0640128
0.000927999	0.0640018
0.000928999	0.0639909
0.000929999	0.0639744
0.000930999	0.0639525
0.000931999	0.0639361
0.000932999	0.0639142
0.000933999	0.0638813
0.000934999	0.063843
0.000935999	0.0638156
0.000936999	0.0637937
0.000937999	0.0637717
0.000938999	0.0637443
0.000939999	0.063706
0.000940999	0.0636786
0.000941999	0.0636238
0.000942999	0.0635635
0.000943999	0.0635252
0.000944999	0.0634704
0.000945999	0.0634266
0.000946999	0.0633828
0.000947999	0.0633334
0.000948999	0.063306
0.000949999	0.0632841
0.000950999	0.0632567
0.000951999	0.0632239
0.000952999	0.063191
0.000953999	0.0631636
0.000954999	0.0631417
0.000955999	0.0631253
0.000956999	0.0631088
0.000957999	0.0630705
0.000958999	0.0630212
0.000959999	0.0629773
0.000960999	0.062939
0.000961999	0.0629006
0.000962999	0.0628623
0.000963999	0.0628349
0.000965999	0.0628184
0.000966999	0.062802
0.000968999	0.0627637
0.000969999	0.0627253
0.000970999	0.0627034
0.000971999	0.0626705
0.000973999	0.0626322
0.000974999	0.0626048
0.000975999	0.0625829
0.000976999	0.0625664
0.000977999	0.0625445
0.000978999	0.0625171
0.000979999	0.0624897
0.000980999	0.0624459
0.000981999	0.0623911
0.000982999	0.0623418
0.000983999	0.0623144
0.000984999	0.062298
0.000985999	0.0622761
0.000986999	0.0622596
0.000987999	0.0622487
0.000988999	0.0622268
0.000989999	0.0621829
0.000990999	0.0621336
0.000991999	0.0621007
0.000992999	0.0620733
0.000994999	0.062046
0.000995999	0.062024
0.000996999	0.0620076
0.000997999	0.0619857
0.000998999	0.0619638
0.000999999	0.0619473
0.001001	0.0619309
0.001002	0.0619145
0.001003	0.061898
0.001004	0.0618871
0.001005	0.0618652
0.001006	0.0618268
0.001007	0.0617994
0.001008	0.061783
0.001009	0.0617611
0.00101	0.0617446
0.001011	0.0617337
0.001012	0.0617118
0.001013	0.0616679
0.001014	0.0616296
0.001015	0.0615967
0.001016	0.0615638
0.001017	0.0615364
0.001018	0.0614871
0.001019	0.0614378
0.00102	0.061405
0.001021	0.0613666
0.001022	0.0613337
0.001024	0.0613063
0.001025	0.0612844
0.001026	0.061268
0.001027	0.0612461
0.001028	0.0612132
0.001029	0.0611803
0.00103	0.0611639
0.001031	0.0611529
0.001032	0.061142
0.001033	0.0611201
0.001034	0.0610981
0.001035	0.0610817
0.001036	0.0610653
0.001037	0.0610379
0.001038	0.0610105
0.001039	0.0609995
0.00104	0.0609721
0.001041	0.0609393
0.001042	0.0609119
0.001044	0.0608845
0.001045	0.0608516
0.001046	0.0608078
0.001048	0.0607749
0.001049	0.0607585
0.00105	0.060742
0.001051	0.0607146
0.001052	0.0606927
0.001053	0.0606818
0.001055	0.0606653
0.001056	0.060627
0.001057	0.0605941
0.001058	0.0605777
0.001059	0.0605612
0.00106	0.0605284
0.001061	0.0604955
0.001062	0.0604736
0.001063	0.0604517
0.001066	0.0604297
0.001067	0.0603859
0.001068	0.0603476
0.001069	0.0603147
0.00107	0.0602818
0.001072	0.0602544
0.001074	0.0602216
0.001075	0.0601887
0.001076	0.0601668
0.001077	0.0601449
0.001078	0.0601229
0.001079	0.060101
0.00108	0.0600791
0.001081	0.0600627
0.001082	0.0600408
0.001083	0.0600134
0.001084	0.0599915
0.001086	0.0599421
0.001087	0.0598764
0.001088	0.0598435
0.001089	0.0598216
0.00109	0.0598052
0.001091	0.0597833
0.001094	0.0597559
0.001095	0.0597394
0.001096	0.0597285
0.001097	0.0596956
0.001099	0.0596627
0.0011	0.0596353
0.001101	0.059597
0.001102	0.0595696
0.001103	0.0595422
0.001104	0.0595148
0.001105	0.0594874
0.001106	0.0594655
0.001108	0.0594381
0.001109	0.0593998
0.00111	0.059345
0.001111	0.0592902
0.001113	0.0592628
0.001114	0.0592299
0.001115	0.0591916
0.001116	0.0591697
0.001117	0.0591477
0.001118	0.0591258
0.001119	0.0591149
0.00112	0.0590875
0.001121	0.0590601
0.001122	0.0590491
0.001123	0.0590272
0.001124	0.0590053
0.001125	0.0589834
0.001126	0.058956
0.001127	0.0589341
0.001129	0.0589067
0.001131	0.0588848
0.001132	0.0588738
0.001134	0.0588628
0.001135	0.0588409
0.001136	0.058819
0.001139	0.0588026
0.001141	0.0587861
0.001142	0.0587697
0.001143	0.0587423
0.001144	0.0587149
0.001145	0.058693
0.001146	0.0586656
0.001147	0.0586273
0.001148	0.0585999
0.001149	0.0585834
0.001151	0.058567
0.001152	0.058556
0.001153	0.0585232
0.001154	0.0584793
0.001155	0.0584465
0.001156	0.0584191
0.001157	0.0584026
0.001158	0.0583862
0.001159	0.0583643
0.00116	0.0583479
0.001161	0.0583205
0.001162	0.0582492
0.001164	0.0581835
0.001165	0.0581506
0.001166	0.0581287
0.001168	0.0581068
0.001169	0.0580849
0.00117	0.0580684
0.001171	0.058041
0.001172	0.0580137
0.001173	0.0579863
0.001174	0.0579643
0.001175	0.0579424
0.001177	0.0579205
0.001178	0.0578986
0.001179	0.0578767
0.00118	0.0578657
0.001181	0.0578438
0.001183	0.0578219
0.001184	0.0578055
0.001185	0.0577781
0.001186	0.0577562
0.001187	0.0577397
0.001188	0.0577068
0.001189	0.0576795
0.00119	0.057663
0.001191	0.0576411
0.001192	0.0576192
0.001193	0.0576028
0.001194	0.0575808
0.001195	0.0575589
0.001196	0.057537
0.001198	0.0575041
0.001199	0.0574767
0.0012	0.0574439
0.001202	0.0574165
0.001203	0.0573946
0.001204	0.0573726
0.001205	0.0573562
0.001206	0.0573233
0.001207	0.0572795
0.001208	0.0572521
0.001209	0.0572357
0.001211	0.0572192
0.001212	0.0572028
0.001213	0.0571754
0.001216	0.0571535
0.001218	0.0571316
0.001219	0.0570878
0.00122	0.0570549
0.001221	0.0570384
0.001222	0.0570111
0.001223	0.0569837
0.001224	0.0569508
0.001225	0.0569234
0.001226	0.056907
0.001228	0.0568905
0.00123	0.0568741
0.001231	0.0568522
0.001232	0.0568193
0.001233	0.056781
0.001236	0.0567536
0.001237	0.0567371
0.001239	0.0567152
0.00124	0.0566823
0.001241	0.0566604
0.001242	0.0566495
0.001243	0.0566275
0.001245	0.0566056
0.001246	0.0565837
0.001248	0.0565563
0.001249	0.0565399
0.00125	0.0565235
0.001251	0.056507
0.001252	0.0564851
0.001254	0.0564577
0.001255	0.0564248
0.001257	0.0563974
0.00126	0.056381
0.001261	0.0563591
0.001262	0.0563207
0.001264	0.0562824
0.001265	0.0562605
0.001266	0.0562331
0.001267	0.0562002
0.001269	0.0561728
0.00127	0.0561454
0.001273	0.056118
0.001274	0.0561016
0.001275	0.0560852
0.001276	0.0560687
0.001279	0.0560523
0.001281	0.0560359
0.001282	0.0560249
0.001283	0.0560085
0.001284	0.0559865
0.001286	0.0559701
0.001287	0.0559592
0.001288	0.0559427
0.001289	0.0559263
0.001291	0.0559153
0.001292	0.0559044
0.001293	0.0558934
0.001295	0.0558715
0.001296	0.0558496
0.001297	0.0558386
0.001299	0.0558277
0.0013	0.0558112
0.001301	0.0557948
0.001302	0.0557838
0.001303	0.0557619
0.001304	0.05574
0.001305	0.0557236
0.001307	0.0556852
0.001308	0.0556523
0.001309	0.0556414
0.00131	0.055625
0.001311	0.0555976
0.001312	0.0555756
0.001313	0.0555592
0.001314	0.0555428
0.001315	0.0555263
0.001316	0.0555099
0.001317	0.055488
0.001318	0.0554606
0.001319	0.0554442
0.001323	0.0554332
0.001324	0.0554222
0.001325	0.0553894
0.001326	0.0553565
0.001328	0.0553455
0.001329	0.0553236
0.001332	0.0552962
0.001336	0.0552798
0.001337	0.0552634
0.001338	0.0552414
0.001341	0.055225
0.001342	0.0551812
0.001343	0.0551374
0.001344	0.0551209
0.001346	0.0551045
0.001349	0.0550935
0.00135	0.0550771
0.001351	0.0550497
0.001352	0.0550223
0.001353	0.0550004
0.001354	0.0549839
0.001356	0.0549675
0.001358	0.0549401
0.001359	0.0549072
0.001361	0.0548799
0.001362	0.0548634
0.001365	0.0548525
0.001366	0.0548415
0.001367	0.0548305
0.001368	0.0548086
0.001369	0.0547867
0.001371	0.0547703
0.001372	0.0547484
0.001373	0.054721
0.001375	0.0546991
0.001377	0.0546881
0.001378	0.0546771
0.001379	0.0546662
0.001381	0.0546552
0.001382	0.0546333
0.001384	0.0546059
0.001385	0.0545785
0.001387	0.0545347
0.001388	0.0544909
0.001389	0.054469
0.00139	0.054458
0.001392	0.0544416
0.001393	0.0544032
0.001394	0.0543703
0.001395	0.0543594
0.001396	0.0543484
0.001397	0.054321
0.001398	0.0542882
0.001399	0.0542662
0.0014	0.0542334
0.001401	0.054206
0.001402	0.0541895
0.001404	0.0541676
0.001405	0.0541457
0.001406	0.0541293
0.001407	0.0541128
0.001409	0.0540909
0.00141	0.0540745
0.001411	0.0540471
0.001413	0.0540197
0.001414	0.0540087
0.001415	0.0539978
0.001416	0.0539759
0.001417	0.053943
0.001418	0.0539211
0.001419	0.0539046
0.00142	0.0538882
0.001421	0.0538663
0.001424	0.0538444
0.001426	0.0538225
0.001427	0.0537951
0.001428	0.0537786
0.001429	0.0537622
0.00143	0.0537348
0.001431	0.0537129
0.001433	0.0536965
0.001434	0.0536745
0.001435	0.0536581
0.001436	0.0536472
0.001437	0.0536362
0.001438	0.0536252
0.00144	0.0536143
0.001441	0.0535924
0.001442	0.053565
0.001444	0.0535485
0.001445	0.0535266
0.001446	0.0535047
0.001447	0.0534883
0.001448	0.0534718
0.001449	0.0534609
0.00145	0.053439
0.001451	0.0534116
0.001452	0.0533897
0.001456	0.0533623
0.001457	0.0533294
0.00146	0.053302
0.001461	0.0532746
0.001462	0.0532417
0.001464	0.0532143
0.001465	0.0531815
0.001468	0.0531541
0.001469	0.0531376
0.00147	0.0531157
0.001472	0.0530993
0.001473	0.0530828
0.001474	0.0530555
0.001475	0.0530281
0.001476	0.0530116
0.001477	0.0530007
0.00148	0.0529788
0.001481	0.0529568
0.001482	0.0529404
0.001483	0.052924
0.001484	0.0529075
0.001486	0.0528801
0.001489	0.0528582
0.001491	0.0528418
0.001492	0.0528144
0.001493	0.0527925
0.001495	0.052776
0.001497	0.0527596
0.001498	0.0527432
0.001503	0.0527103
0.001504	0.0526829
0.001506	0.0526719
0.001507	0.0526555
0.001508	0.0526391
0.001509	0.0526281
0.001511	0.0526172
0.001512	0.0526007
0.001514	0.0525843
0.001515	0.0525733
0.001516	0.0525624
0.001518	0.0525459
0.001519	0.052524
0.00152	0.0525076
0.001521	0.0524966
0.001524	0.0524857
0.001525	0.0524638
0.001526	0.0524418
0.001527	0.0524199
0.001528	0.0523871
0.001529	0.0523651
0.00153	0.0523542
0.001531	0.0523377
0.001532	0.0523213
0.001533	0.0522994
0.001534	0.0522775
0.001536	0.0522501
0.001537	0.0522172
0.001538	0.0522008
0.001539	0.0521898
0.00154	0.0521734
0.001541	0.052157
0.001542	0.052146
0.001543	0.0521241
0.001544	0.0520967
0.001545	0.0520803
0.001546	0.0520638
0.001547	0.0520419
0.001548	0.0520145
0.00155	0.0519816
0.001551	0.0519597
0.001552	0.0519433
0.001554	0.0519214
0.001555	0.0518995
0.001556	0.051883
0.001558	0.0518721
0.001561	0.0518447
0.001562	0.0518118
0.001565	0.0517899
0.001566	0.051768
0.001567	0.0517515
0.001568	0.0517406
0.001569	0.0517187
0.001572	0.0516967
0.001574	0.0516803
0.001575	0.0516639
0.001576	0.0516529
0.001577	0.0516365
0.001578	0.05162
0.00158	0.0516091
0.001581	0.0515981
0.001583	0.0515872
0.001584	0.0515762
0.001585	0.0515598
0.001587	0.0515433
0.001589	0.0515324
0.001591	0.0515159
0.001592	0.0514995
0.001593	0.0514831
0.001595	0.0514666
0.001596	0.0514502
0.001597	0.0514338
0.0016	0.0514228
0.001601	0.0514119
0.001602	0.0514009
0.001606	0.0513899
0.001608	0.0513735
0.001611	0.0513571
0.001612	0.0513406
0.001613	0.0513187
0.001614	0.0513023
0.001615	0.0512913
0.001618	0.0512804
0.001619	0.0512694
0.00162	0.0512585
0.001621	0.051242
0.001622	0.0512201
0.001623	0.0511927
0.001624	0.0511598
0.001625	0.0511324
0.001626	0.051116
0.001627	0.0510996
0.001628	0.0510777
0.001631	0.0510503
0.001633	0.0510283
0.001634	0.0510174
0.001637	0.051001
0.001638	0.0509845
0.001639	0.0509736
0.001641	0.0509571
0.001643	0.0509352
0.001644	0.0509133
0.001645	0.0508914
0.001646	0.0508695
0.001647	0.050853
0.00165	0.0508366
0.001651	0.0508147
0.001652	0.0507873
0.001653	0.0507544
0.001654	0.0507161
0.001655	0.0506887
0.001657	0.0506777
0.001659	0.0506558
0.00166	0.0506339
0.001661	0.0506229
0.001662	0.050612
0.001663	0.0505955
0.001664	0.0505791
0.001666	0.0505681
0.001668	0.0505407
0.001669	0.0505079
0.001673	0.0504914
0.001674	0.0504805
0.001675	0.0504695
0.001676	0.0504531
0.001677	0.0504367
0.001678	0.0504147
0.001679	0.0503928
0.001681	0.0503764
0.001683	0.0503599
0.001684	0.050349
0.001685	0.050338
0.001686	0.0503271
0.001687	0.0503106
0.001688	0.0502887
0.001691	0.0502668
0.001692	0.0502504
0.001693	0.0502339
0.001694	0.0502175
0.001695	0.0502065
0.001696	0.0501901
0.001697	0.0501737
0.001698	0.0501572
0.001699	0.0501353
0.0017	0.0501189
0.001702	0.0501025
0.001703	0.0500805
0.001704	0.0500641
0.001705	0.0500422
0.001708	0.0500203
0.001709	0.0500093
0.00171	0.0499929
0.001711	0.0499655
0.001713	0.0499381
0.001714	0.0499217
0.001719	0.0499107
0.001722	0.0498997
0.001723	0.0498888
0.001726	0.0498778
0.001727	0.0498669
0.001728	0.0498504
0.001729	0.0498285
0.00173	0.0498066
0.001731	0.0497902
0.001732	0.0497792
0.001733	0.0497683
0.001734	0.0497573
0.001735	0.0497463
0.001736	0.0497244
0.001738	0.0496916
0.001739	0.0496696
0.00174	0.0496587
0.001742	0.0496477
0.001743	0.0496368
0.001744	0.0496203
0.001745	0.0496039
0.001746	0.0495875
0.001747	0.0495655
0.001748	0.0495327
0.001749	0.0495053
0.00175	0.0494888
0.001751	0.0494669
0.001752	0.0494505
0.001753	0.0494395
0.001754	0.0494231
0.001755	0.0494012
0.001756	0.0493847
0.001758	0.0493738
0.001761	0.0493628
0.001763	0.0493519
0.001765	0.0493354
0.001766	0.049319
0.001767	0.0493026
0.001769	0.0492752
0.00177	0.0492478
0.001772	0.0492313
0.001774	0.0492204
0.001775	0.0492039
0.001776	0.0491875
0.001779	0.0491766
0.00178	0.0491601
0.001782	0.0491437
0.001785	0.0491272
0.001787	0.0490999
0.001789	0.0490725
0.00179	0.049056
0.001792	0.0490396
0.001793	0.0490232
0.001795	0.0490122
0.001797	0.0490012
0.001798	0.0489903
0.0018	0.0489793
0.001801	0.0489684
0.001805	0.0489574
0.001807	0.0489465
0.001809	0.0489355
0.001812	0.0489191
0.001814	0.0489026
0.001815	0.0488917
0.001816	0.0488698
0.001817	0.0488424
0.001818	0.048815
0.001819	0.0487876
0.00182	0.0487657
0.001821	0.0487437
0.001824	0.0487163
0.001825	0.048689
0.001826	0.048667
0.001827	0.0486506
0.001828	0.0486287
0.001829	0.0486013
0.00183	0.0485849
0.001831	0.0485684
0.001834	0.048552
0.001837	0.0485356
0.001839	0.0485191
0.001843	0.0485027
0.001844	0.0484753
0.001845	0.0484479
0.001846	0.0484315
0.001847	0.048415
0.001848	0.0483876
0.001849	0.0483657
0.001851	0.0483548
0.001853	0.0483438
0.001856	0.0483328
0.001857	0.0483109
0.001859	0.0482835
0.00186	0.0482561
0.001861	0.0482342
0.001863	0.0482178
0.001865	0.0481959
0.001867	0.0481794
0.001869	0.048163
0.00187	0.0481411
0.001872	0.0481247
0.001876	0.0481137
0.00188	0.0480973
0.001881	0.0480808
0.001883	0.0480699
0.001884	0.0480534
0.001885	0.048037
0.001888	0.048026
0.001889	0.0480041
0.00189	0.0479658
0.001891	0.0479384
0.001892	0.0479274
0.001895	0.0479165
0.001896	0.0479
0.001897	0.0478781
0.001898	0.0478562
0.001899	0.0478178
0.001902	0.047785
0.001903	0.047774
0.001904	0.0477631
0.001908	0.0477466
0.00191	0.0477302
0.001915	0.0477192
0.001916	0.0477083
0.001919	0.0476973
0.001924	0.0476864
0.001925	0.0476754
0.001926	0.047659
0.001927	0.0476425
0.001929	0.0476261
0.00193	0.0476042
0.001931	0.0475877
0.001934	0.0475658
0.001936	0.0475439
0.001937	0.047533
0.001938	0.047522
0.001941	0.047511
0.001942	0.0475001
0.001943	0.0474836
0.001945	0.0474508
0.001946	0.0474234
0.001947	0.0474069
0.001948	0.047385
0.00195	0.0473631
0.001951	0.0473467
0.001952	0.0473357
0.001953	0.0473083
0.001954	0.0472809
0.001957	0.04727
0.001958	0.047259
0.001963	0.0472481
0.001964	0.0472371
0.001965	0.0472261
0.001966	0.0471933
0.001967	0.0471604
0.001968	0.0471385
0.001969	0.0471111
0.001972	0.0470892
0.001974	0.0470673
0.001976	0.0470508
0.001977	0.0470399
0.00198	0.0470289
0.001981	0.047018
0.001982	0.047007
0.001983	0.0469796
0.001985	0.0469522
0.001987	0.0469358
0.001993	0.0469029
0.001995	0.04687
0.001996	0.0468536
0.001997	0.0468426
0.001998	0.0468262
0.002001	0.0468098
0.002003	0.0467933
0.002006	0.0467605
0.002007	0.0467331
0.002008	0.0467221
0.002009	0.0467002
0.002011	0.0466783
0.002012	0.0466673
0.002018	0.0466564
0.002019	0.0466399
0.00202	0.046618
0.002021	0.0466016
0.002028	0.0465851
0.002031	0.0465687
0.002032	0.0465523
0.002037	0.0465358
0.002038	0.0465194
0.002041	0.046503
0.002043	0.0464865
0.002045	0.0464701
0.002046	0.0464537
0.002047	0.0464372
0.00205	0.0464263
0.002051	0.0464153
0.002052	0.0464043
0.002053	0.0463934
0.002054	0.0463824
0.002055	0.0463715
0.002056	0.0463605
0.002057	0.0463496
0.002059	0.0463386
0.00206	0.0463276
0.002061	0.0463167
0.002063	0.0463057
0.002065	0.0462948
0.002067	0.0462783
0.002069	0.0462619
0.00207	0.0462455
0.002072	0.0462126
0.002074	0.0461797
0.002075	0.0461633
0.002077	0.0461469
0.002078	0.0461249
0.002081	0.0461085
0.002083	0.0460975
0.002084	0.0460811
0.002085	0.0460647
0.002086	0.0460537
0.002087	0.0460428
0.002089	0.0460208
0.00209	0.0459989
0.002094	0.045988
0.002095	0.045977
0.002096	0.0459661
0.002097	0.0459551
0.002098	0.0459387
0.002099	0.0459222
0.002102	0.0459113
0.002103	0.0459003
0.002106	0.0458894
0.002112	0.0458784
0.002113	0.0458674
0.002115	0.045851
0.002117	0.0458346
0.002118	0.0458236
0.002121	0.0458017
0.002123	0.0457688
0.002126	0.0457469
0.002127	0.0457359
0.002129	0.045725
0.00213	0.0457086
0.002131	0.0456921
0.002132	0.0456812
0.002138	0.0456702
0.002139	0.0456538
0.00214	0.0456373
0.002141	0.0456264
0.002142	0.0456154
0.002143	0.0456045
0.002147	0.0455935
0.002148	0.0455771
0.002151	0.0455606
0.002155	0.0455442
0.002159	0.0455223
0.002161	0.0455004
0.002166	0.0454839
0.002167	0.045473
0.002168	0.0454565
0.002171	0.0454346
0.002173	0.0454182
0.002175	0.0453963
0.002176	0.0453744
0.002179	0.0453634
0.002182	0.0453524
0.002184	0.0453415
0.002186	0.0453305
0.002187	0.0453196
0.002188	0.0453086
0.002189	0.0452977
0.002191	0.0452867
0.002192	0.0452757
0.002194	0.0452648
0.002196	0.0452483
0.002197	0.0452264
0.002198	0.04521
0.002199	0.0451936
0.002201	0.0451716
0.002204	0.0451552
0.002207	0.0451388
0.002208	0.0451223
0.002209	0.0451114
0.00221	0.0451004
0.002211	0.0450895
0.002213	0.045073
0.002214	0.0450566
0.002217	0.0450456
0.002219	0.0450347
0.00222	0.0450237
0.002221	0.0450018
0.002224	0.0449744
0.002225	0.044958
0.002226	0.044947
0.002227	0.0449361
0.00223	0.0449196
0.002231	0.0449032
0.002233	0.0448922
0.002237	0.0448758
0.002238	0.0448594
0.002239	0.0448484
0.00224	0.0448374
0.002241	0.0448265
0.002242	0.0448101
0.002243	0.0447936
0.002245	0.0447772
0.002246	0.0447607
0.002249	0.0447443
0.002253	0.0447279
0.002254	0.0447169
0.002256	0.044706
0.002258	0.0446895
0.002259	0.0446676
0.00226	0.0446512
0.002262	0.0446402
0.002263	0.0446293
0.002264	0.0446128
0.002268	0.0445964
0.002269	0.0445854
0.00227	0.0445745
0.002271	0.0445635
0.002272	0.0445526
0.002274	0.0445306
0.002276	0.0445087
0.002278	0.0444978
0.002281	0.0444868
0.002283	0.0444704
0.002285	0.0444485
0.002286	0.044432
0.002287	0.0444211
0.002288	0.0444101
0.002291	0.0443992
0.002293	0.0443882
0.002294	0.0443772
0.002296	0.0443608
0.002301	0.0443389
0.002304	0.044317
0.002305	0.0443005
0.002307	0.0442786
0.002309	0.0442567
0.00231	0.0442458
0.002311	0.0442293
0.002312	0.0442129
0.002313	0.044191
0.002315	0.0441526
0.002316	0.0441252
0.002318	0.0441143
0.00232	0.0441033
0.002325	0.0440923
0.002326	0.0440814
0.002327	0.0440704
0.002329	0.044054
0.002332	0.0440376
0.002334	0.0440266
0.002338	0.0440156
0.002339	0.0440047
0.00234	0.0439937
0.002341	0.0439828
0.002343	0.0439663
0.002344	0.0439499
0.002346	0.0439389
0.002347	0.0439225
0.002352	0.0439061
0.002355	0.0438951
0.002357	0.0438842
0.002358	0.0438732
0.002359	0.0438458
0.002361	0.0438129
0.002362	0.043791
0.002363	0.0437746
0.002365	0.0437636
0.002367	0.0437527
0.002368	0.0437417
0.002369	0.0437308
0.002371	0.0437198
0.002373	0.0437034
0.002374	0.0436814
0.002377	0.043665
0.002378	0.0436541
0.002381	0.0436321
0.002382	0.0436102
0.002384	0.0435883
0.002388	0.0435664
0.002389	0.0435554
0.00239	0.043539
0.002393	0.0435226
0.002397	0.0435116
0.002402	0.0435007
0.002405	0.0434842
0.002407	0.0434678
0.002408	0.0434568
0.00241	0.0434459
0.002412	0.0434294
0.002416	0.043413
0.002419	0.043402
0.002422	0.0433911
0.002424	0.0433801
0.002425	0.0433692
0.002426	0.0433582
0.002428	0.0433472
0.002431	0.0433363
0.002433	0.0433199
0.002434	0.0433034
0.002435	0.0432925
0.00244	0.0432815
0.002441	0.0432705
0.002442	0.0432432
0.002446	0.0432158
0.002447	0.0431993
0.002448	0.0431719
0.00245	0.0431445
0.002452	0.0431281
0.002454	0.0431007
0.002456	0.0430624
0.002457	0.0430404
0.002466	0.043024
0.002467	0.0430076
0.002468	0.0429966
0.002475	0.0429857
0.002478	0.0429637
0.002482	0.0429309
0.002485	0.042909
0.002486	0.0428925
0.002488	0.0428761
0.002489	0.0428651
0.00249	0.0428542
0.002491	0.0428377
0.002492	0.0428213
0.002493	0.0428049
0.002494	0.0427884
0.002499	0.0427775
0.002504	0.0427665
0.002505	0.0427556
0.002506	0.0427446
0.002507	0.0427336
0.002509	0.0427227
0.002511	0.0427117
0.002519	0.0427008
0.00252	0.0426898
0.002524	0.0426789
0.002525	0.0426679
0.002527	0.0426569
0.002533	0.042646
0.002535	0.0426241
0.002536	0.0426021
0.002538	0.0425802
0.00254	0.0425583
0.002543	0.0425419
0.002546	0.0425254
0.002547	0.0425145
0.002548	0.0425035
0.002552	0.0424926
0.002553	0.0424761
0.002555	0.0424597
0.002557	0.0424487
0.002559	0.0424378
0.002562	0.0424214
0.002564	0.0424049
0.002567	0.0423885
0.002569	0.042372
0.002571	0.0423611
0.002572	0.0423447
0.002577	0.0423227
0.002578	0.0423008
0.002579	0.0422844
0.00258	0.0422734
0.002587	0.042257
0.00259	0.0422406
0.002595	0.0422241
0.002596	0.0422077
0.002597	0.0421858
[truncated: 3,606 more rows]

## Sheet: s=0.1
0	0.993745
9.99999e-07	0.854207
2e-06	0.667679
3e-06	0.580359
4e-06	0.524698
5e-06	0.485757
5.99999e-06	0.45516
6.99999e-06	0.431349
7.99999e-06	0.411032
8.99999e-06	0.393204
9.99999e-06	0.378194
1.1e-05	0.365142
1.2e-05	0.354049
1.3e-05	0.344198
1.4e-05	0.33454
1.5e-05	0.325671
1.6e-05	0.31783
1.7e-05	0.310689
1.8e-05	0.304219
1.9e-05	0.298196
2e-05	0.292556
2.1e-05	0.287413
2.2e-05	0.282604
2.3e-05	0.278014
2.4e-05	0.273724
2.5e-05	0.269778
2.6e-05	0.265962
2.7e-05	0.262174
2.8e-05	0.258544
2.9e-05	0.255061
3e-05	0.251691
3.1e-05	0.248642
3.2e-05	0.245797
3.3e-05	0.242963
3.4e-05	0.240276
3.5e-05	0.237583
3.6e-05	0.234992
3.7e-05	0.232757
3.8e-05	0.230617
3.9e-05	0.228416
4e-05	0.22618
4.1e-05	0.223866
4.2e-05	0.221664
4.3e-05	0.219654
4.4e-05	0.217735
4.5e-05	0.215872
4.6e-05	0.214088
4.7e-05	0.212406
4.8e-05	0.210865
4.9e-05	0.209329
5e-05	0.20776
5.09999e-05	0.206309
5.19999e-05	0.204858
5.29999e-05	0.203458
5.39999e-05	0.202053
5.49999e-05	0.2005
5.59999e-05	0.199083
5.69999e-05	0.197819
5.79999e-05	0.196549
5.89999e-05	0.195346
5.99999e-05	0.1942
6.09999e-05	0.193077
6.19999e-05	0.191767
6.29999e-05	0.190474
6.39999e-05	0.189351
6.49999e-05	0.188273
6.59999e-05	0.187262
6.69999e-05	0.186184
6.79999e-05	0.185111
6.89999e-05	0.184078
6.99999e-05	0.183057
7.09999e-05	0.182102
7.19999e-05	0.181154
7.29999e-05	0.180065
7.39999e-05	0.179071
7.49999e-05	0.178224
7.59999e-05	0.177349
7.69999e-05	0.17648
7.79999e-05	0.175639
7.89999e-05	0.17482
7.99999e-05	0.173973
8.09999e-05	0.173098
8.19999e-05	0.172263
8.29999e-05	0.171529
8.39999e-05	0.170823
8.49999e-05	0.170033
8.59999e-05	0.169186
8.69999e-05	0.168447
8.79999e-05	0.167752
8.89999e-05	0.166934
8.99999e-05	0.166144
9.09999e-05	0.165438
9.19999e-05	0.16467
9.29999e-05	0.163914
9.39999e-05	0.163197
9.49999e-05	0.162508
9.59999e-05	0.161921
9.69999e-05	0.161339
9.79999e-05	0.160685
9.89999e-05	0.160069
9.99999e-05	0.15951
0.000101	0.158912
0.000102	0.158291
0.000103	0.157681
0.000104	0.157123
0.000105	0.156547
0.000106	0.155926
0.000107	0.155271
0.000108	0.154712
0.000109	0.154255
0.00011	0.153735
0.000111	0.153193
0.000112	0.152697
0.000113	0.152189
0.000114	0.151664
0.000115	0.151218
0.000116	0.150755
0.000117	0.150247
0.000118	0.149778
0.000119	0.149281
0.00012	0.148728
0.000121	0.148243
0.000122	0.14774
0.000123	0.147232
0.000124	0.146764
0.000125	0.146323
0.000126	0.145922
0.000127	0.145505
0.000128	0.145121
0.000129	0.144737
0.00013	0.144364
0.000131	0.144037
0.000132	0.143749
0.000133	0.143433
0.000134	0.142998
0.000135	0.142564
0.000136	0.14218
0.000137	0.141762
0.000138	0.141418
0.000139	0.141011
0.00014	0.140481
0.000141	0.140023
0.000142	0.139685
0.000143	0.139397
0.000144	0.139075
0.000145	0.138663
0.000146	0.138172
0.000147	0.137765
0.000148	0.13746
0.000149	0.137167
0.00015	0.136845
0.000151	0.136557
0.000152	0.136292
0.000153	0.135908
0.000154	0.135524
0.000155	0.135185
0.000156	0.134869
0.000157	0.134587
0.000158	0.134254
0.000159	0.133898
0.00016	0.133531
0.000161	0.133136
0.000162	0.13278
0.000163	0.132538
0.000164	0.132284
0.000165	0.131951
0.000166	0.131601
0.000167	0.13129
0.000168	0.131014
0.000169	0.130731
0.00017	0.130466
0.000171	0.130189
0.000172	0.12989
0.000173	0.129597
0.000174	0.129314
0.000175	0.129021
0.000176	0.128727
0.000177	0.128456
0.000178	0.128174
0.000179	0.127858
0.00018	0.127559
0.000181	0.127282
0.000182	0.127005
0.000183	0.126751
0.000184	0.12648
0.000185	0.12617
0.000186	0.12591
0.000187	0.125645
0.000188	0.125391
0.000189	0.125222
0.00019	0.125007
0.000191	0.124793
0.000192	0.124589
0.000193	0.124324
0.000194	0.124081
0.000195	0.123889
0.000196	0.123658
0.000197	0.123409
0.000198	0.12315
0.000199	0.122873
0.0002	0.122625
0.000201	0.122388
0.000202	0.122173
0.000203	0.121976
0.000204	0.12175
0.000205	0.12149
0.000206	0.121236
0.000207	0.121022
0.000208	0.120784
0.000209	0.120491
0.00021	0.120226
0.000211	0.119943
0.000212	0.11965
0.000213	0.119379
0.000214	0.119119
0.000215	0.11891
0.000216	0.118735
0.000217	0.118577
0.000218	0.118402
0.000219	0.118233
0.00022	0.118063
0.000221	0.117888
0.000222	0.117713
0.000223	0.117454
0.000224	0.1172
0.000225	0.117059
0.000226	0.116906
0.000227	0.116726
0.000228	0.116556
0.000229	0.116336
0.00023	0.116099
0.000231	0.115924
0.000232	0.115732
0.000233	0.115523
0.000234	0.115342
0.000235	0.115151
0.000236	0.114964
0.000237	0.114733
0.000238	0.114467
0.000239	0.114225
0.00024	0.114022
0.000241	0.113869
0.000242	0.113739
0.000243	0.113638
0.000244	0.113491
0.000245	0.113288
0.000246	0.113096
0.000247	0.112926
0.000248	0.112746
0.000249	0.112565
0.00025	0.112356
0.000251	0.112142
0.000252	0.111995
0.000253	0.111888
0.000254	0.111786
0.000255	0.111656
0.000256	0.111526
0.000257	0.111397
0.000258	0.111255
0.000259	0.111086
0.00026	0.110934
0.000261	0.11077
0.000262	0.110601
0.000263	0.110454
0.000264	0.110256
0.000265	0.110087
0.000266	0.10998
0.000267	0.109855
0.000268	0.109709
0.000269	0.109545
0.00027	0.109347
0.000271	0.109178
0.000272	0.109037
0.000273	0.108862
0.000274	0.108681
0.000275	0.108472
0.000276	0.108252
0.000277	0.108066
0.000278	0.107919
0.000279	0.107755
0.00028	0.107558
0.000281	0.107366
0.000282	0.107202
0.000283	0.107061
0.000284	0.10692
0.000285	0.10679
0.000286	0.106643
0.000287	0.10648
0.000288	0.106327
0.000289	0.106169
0.00029	0.106045
0.000291	0.105926
0.000292	0.105763
0.000293	0.105593
0.000294	0.105435
0.000295	0.105311
0.000296	0.105221
0.000297	0.105119
0.000298	0.104978
0.000299	0.104831
0.0003	0.10469
0.000301	0.104532
0.000302	0.104368
0.000303	0.104255
0.000304	0.104142
0.000305	0.10399
0.000306	0.103826
0.000307	0.103668
0.000308	0.10351
0.000309	0.103363
0.00031	0.103222
0.000311	0.103059
0.000312	0.102934
0.000313	0.102821
0.000314	0.102703
0.000315	0.10259
0.000316	0.102432
0.000317	0.10228
0.000318	0.102144
0.000319	0.10202
0.00032	0.10193
0.000321	0.101856
0.000322	0.101771
0.000323	0.101659
0.000324	0.101551
0.000325	0.101438
0.000326	0.101303
0.000327	0.101184
0.000328	0.101083
0.000329	0.100975
0.00033	0.100868
0.000331	0.100767
0.000332	0.100659
0.000333	0.100541
0.000334	0.100428
0.000335	0.100309
0.000336	0.100185
0.000337	0.100055
0.000338	0.099886
0.000339	0.0997505
0.00034	0.0996432
0.000341	0.0995416
0.000342	0.0994739
0.000343	0.0993779
0.000344	0.0992706
0.000345	0.0991577
0.000346	0.0990392
0.000347	0.0989489
0.000348	0.0988247
0.000349	0.0986948
0.00035	0.098565
0.000351	0.0984295
0.000352	0.0983448
0.000353	0.0982432
0.000354	0.0981247
0.000355	0.0980231
0.000356	0.0979045
0.000357	0.0977803
0.000358	0.09769
0.000359	0.0976053
0.00036	0.097515
0.000361	0.0974416
0.000362	0.0973343
0.000363	0.0972158
0.000364	0.0971029
0.000365	0.09699
0.000366	0.096911
0.000367	0.0968376
0.000368	0.0967303
0.000369	0.0966174
0.00037	0.0965045
0.000371	0.096386
0.000372	0.0962787
0.000373	0.0961827
0.000374	0.0961037
0.000375	0.0960021
0.000376	0.0958948
0.000377	0.0957706
0.000378	0.0956351
0.000379	0.0955448
0.00038	0.0954771
0.000381	0.0954037
0.000382	0.0953021
0.000383	0.0951892
0.000384	0.0950932
0.000385	0.0949972
0.000386	0.0949182
0.000387	0.0948787
0.000388	0.0948279
0.000389	0.0947601
0.00039	0.0946924
0.000391	0.0946416
0.000392	0.0945795
0.000393	0.0944835
0.000394	0.0944045
0.000395	0.0943367
0.000396	0.0942859
0.000397	0.0941956
0.000398	0.094094
0.000399	0.094015
0.0004	0.0939303
0.000401	0.0938456
0.000402	0.0937553
0.000403	0.0936876
0.000404	0.0936142
0.000405	0.0935125
0.000406	0.0934053
0.000407	0.0933206
0.000408	0.0932416
0.000409	0.0931343
0.00041	0.093044
0.000411	0.0929875
0.000412	0.0929085
0.000413	0.0928295
0.000414	0.092773
0.000415	0.0927222
0.000416	0.0926714
0.000417	0.092598
0.000418	0.0924964
0.000419	0.0924174
0.00042	0.0923609
0.000421	0.0922932
0.000422	0.0922142
0.000423	0.0921408
0.000424	0.0920448
0.000425	0.091915
0.000426	0.0918246
0.000427	0.0917456
0.000428	0.0916553
0.000429	0.0915537
0.00043	0.0914577
0.000431	0.0913787
0.000432	0.0913053
0.000433	0.0912375
0.000434	0.0911303
0.000435	0.0910117
0.000436	0.0908932
0.000437	0.0907972
0.000438	0.0907295
0.000439	0.0906674
0.00044	0.0906222
0.000441	0.0905432
0.000442	0.0904472
0.000443	0.0903625
0.000444	0.0902666
0.000445	0.090165
0.000446	0.090052
0.000447	0.0899617
0.000448	0.0898827
0.000449	0.089815
0.00045	0.0897641
0.000451	0.0896964
0.000452	0.0896399
0.000453	0.0895609
0.000454	0.089448
0.000455	0.089352
0.000456	0.0892899
0.000457	0.0892391
0.000458	0.089194
0.000459	0.0891488
0.00046	0.0890754
0.000461	0.0889682
0.000462	0.0888722
0.000463	0.0888214
0.000464	0.0887819
0.000465	0.0886746
0.000466	0.0885561
0.000467	0.088494
0.000468	0.0884319
0.000469	0.0883585
0.00047	0.0882738
0.000471	0.0881835
0.000472	0.0881045
0.000473	0.0880367
0.000474	0.0879633
0.000475	0.087873
0.000476	0.0877657
0.000477	0.0876811
0.000478	0.087602
0.000479	0.0875004
0.00048	0.0873988
0.000481	0.0873198
0.000482	0.0872464
0.000483	0.087173
0.000484	0.0870827
0.000485	0.0869811
0.000486	0.0869246
0.000487	0.0868738
0.000488	0.0868004
0.000489	0.0867214
0.00049	0.0866649
0.000491	0.0866028
0.000492	0.0865351
0.000493	0.086473
0.000494	0.086394
0.000495	0.0863375
0.000496	0.086298
0.000497	0.0862585
0.000498	0.0862359
0.000499	0.0861851
0.0005	0.0860891
0.000500999	0.0859988
0.000501999	0.0858972
0.000502999	0.0858012
0.000503999	0.0857391
0.000504999	0.0856883
0.000505999	0.0856488
0.000506999	0.0856206
0.000507999	0.0855754
0.000508999	0.085502
0.000509999	0.0854117
0.000510999	0.085327
0.000511999	0.085248
0.000512999	0.085169
0.000513999	0.0850956
0.000514999	0.0850335
0.000515999	0.084977
0.000516999	0.0849149
0.000517999	0.0848698
0.000518999	0.084802
0.000519999	0.084723
0.000520999	0.0846496
0.000521999	0.0845762
0.000522999	0.0845198
0.000523999	0.084452
0.000524999	0.084373
0.000525999	0.0843052
0.000526999	0.0842488
0.000527999	0.0841698
0.000528999	0.0840738
0.000529999	0.0839665
0.000530999	0.0838875
0.000531999	0.0838423
0.000532999	0.083769
0.000533999	0.0836899
0.000534999	0.0835827
0.000535999	0.0834867
0.000536999	0.0834302
0.000537999	0.0833794
0.000538999	0.0833173
0.000539999	0.083244
0.000540999	0.0831931
0.000541999	0.0831593
0.000542999	0.0831085
0.000543999	0.0830351
0.000544999	0.0829673
0.000545999	0.0829165
0.000546999	0.0828431
0.000547999	0.0827641
0.000548999	0.0827133
0.000549999	0.0826456
0.000550999	0.0825835
0.000551999	0.0825101
0.000552999	0.0824254
0.000553999	0.0823689
0.000554999	0.0823294
0.000555999	0.0822843
0.000556999	0.0822278
0.000557999	0.082177
0.000558999	0.0821206
0.000559999	0.0820698
0.000560999	0.0820302
0.000561999	0.0819964
0.000562999	0.0819568
0.000563999	0.0818891
0.000564999	0.081827
0.000565999	0.0817818
0.000566999	0.0817423
0.000567999	0.0817028
0.000568999	0.0816577
0.000569999	0.0816125
0.000570999	0.081573
0.000571999	0.0815391
0.000572999	0.0814883
0.000573999	0.0814318
0.000574999	0.081381
0.000575999	0.0813415
0.000576999	0.0813133
0.000577999	0.0812738
0.000578999	0.081223
0.000579999	0.0811778
0.000580999	0.0811496
0.000581999	0.0811044
0.000582999	0.0810197
0.000583999	0.0809464
0.000584999	0.0809068
0.000585999	0.0808673
0.000586999	0.0808335
0.000587999	0.080777
0.000588999	0.080681
0.000589999	0.0806189
0.000590999	0.0805851
0.000591999	0.0805343
0.000592999	0.0804722
0.000593999	0.0804214
0.000594999	0.0803593
0.000595999	0.0802802
0.000596999	0.0802238
0.000597999	0.0801843
0.000598999	0.0801165
0.000599999	0.0800205
0.000600999	0.0799472
0.000601999	0.0798964
0.000602999	0.0798512
0.000603999	0.0798117
0.000604999	0.0797891
0.000605999	0.0797609
0.000606999	0.0797101
0.000607999	0.079648
0.000608999	0.0795802
0.000609999	0.0795012
0.000610999	0.0794334
0.000611999	0.0793601
0.000612999	0.0793036
0.000613999	0.0792697
0.000614999	0.079202
0.000615999	0.0791512
0.000616999	0.0791004
0.000617999	0.079027
0.000618999	0.0789762
0.000619999	0.0789028
0.000620999	0.0788294
0.000621999	0.078773
0.000622999	0.0787109
0.000623999	0.0786544
0.000624999	0.0786149
0.000625999	0.0785923
0.000626999	0.0785528
0.000627999	0.0784681
0.000628999	0.0783947
0.000629999	0.0783552
0.000630999	0.0782818
0.000631999	0.0782141
0.000632999	0.0781463
0.000633999	0.078073
0.000634999	0.0780222
0.000635999	0.0779939
0.000636999	0.0779657
0.000637999	0.0779262
0.000638999	0.0778472
0.000639999	0.0777399
0.000640999	0.0776665
0.000641999	0.0775988
0.000642999	0.0775423
0.000643999	0.0775084
0.000644999	0.0774746
0.000645999	0.0774238
0.000646999	0.0773673
0.000647999	0.0773278
0.000648999	0.0772939
0.000650999	0.0772601
0.000651999	0.0772318
0.000652999	0.0772149
0.000653999	0.0771641
0.000654999	0.077102
0.000656999	0.0770738
0.000657999	0.0770399
0.000658999	0.077006
0.000659999	0.0769665
0.000660999	0.0769157
0.000661999	0.0768818
0.000662999	0.0768367
0.000663999	0.0767802
0.000664999	0.076735
0.000665999	0.0766899
0.000666999	0.0766447
0.000667999	0.0765883
0.000668999	0.0765149
0.000669999	0.0764359
0.000670999	0.0763738
0.000671999	0.0763173
0.000672999	0.0762496
0.000673999	0.0761875
0.000674999	0.0761367
0.000675999	0.0760915
0.000676999	0.0760633
0.000677999	0.076035
0.000678999	0.0759786
0.000679999	0.0759165
0.000680999	0.07586
0.000681999	0.0758092
0.000682999	0.0757697
0.000683999	0.0757246
0.000685999	0.0756794
0.000686999	0.0756342
0.000687999	0.0755891
0.000688999	0.0755552
0.000689999	0.075527
0.000690999	0.0755044
0.000691999	0.0754818
0.000692999	0.0754536
0.000693999	0.0754197
0.000694999	0.0753915
0.000695999	0.0753689
0.000696999	0.075335
0.000697999	0.0753012
0.000698999	0.0752391
0.000699999	0.0751713
0.000700999	0.0751375
0.000701999	0.0751036
0.000702999	0.0750697
0.000703999	0.0750302
0.000704999	0.074985
0.000705999	0.0749342
0.000706999	0.0748721
0.000707999	0.0748213
0.000708999	0.0747649
0.000709999	0.0747197
0.000710999	0.0746915
0.000711999	0.074635
0.000712999	0.0745842
0.000713999	0.0745391
0.000714999	0.0744487
0.000715999	0.0743641
0.000716999	0.0743189
0.000717999	0.074285
0.000718999	0.0742625
0.000719999	0.0742455
0.000720999	0.0742116
0.000721999	0.0741665
0.000722999	0.0741326
0.000723999	0.0740705
0.000724999	0.0740028
0.000725999	0.0739689
0.000726999	0.073935
0.000727999	0.0738899
0.000728999	0.0738391
0.000729999	0.0738052
0.000730999	0.0737713
0.000731999	0.0737318
0.000732999	0.0737036
0.000733999	0.0736754
0.000734999	0.0736584
0.000735999	0.0736415
0.000736999	0.0736133
0.000737999	0.0735625
0.000738999	0.073506
0.000739999	0.0734608
0.000740999	0.0734213
0.000741999	0.0733818
0.000742999	0.0733536
0.000743999	0.073331
0.000744999	0.0733084
0.000745999	0.0732802
0.000746999	0.0732463
0.000747999	0.0732125
0.000748999	0.0731729
0.000749999	0.0731391
0.000750999	0.0730995
0.000751999	0.0730657
0.000752999	0.0730318
0.000753999	0.0729697
0.000754999	0.0729245
0.000755999	0.072902
0.000756999	0.0728624
0.000757999	0.0728173
0.000758999	0.0727721
0.000759999	0.0727326
0.000760999	0.0727044
0.000761999	0.0726705
0.000762999	0.072631
0.000763999	0.0725915
0.000764999	0.0725463
0.000765999	0.0725181
0.000766999	0.0724842
0.000767999	0.0724447
0.000768999	0.0724165
0.000769999	0.0723713
0.000770999	0.0723149
0.000771999	0.072281
0.000772999	0.0722641
0.000773999	0.0722189
0.000774999	0.0721794
0.000776999	0.0721624
0.000778999	0.0721286
0.000779999	0.0720947
0.000780999	0.0720778
0.000781999	0.0720439
0.000782999	0.0720044
0.000783999	0.0719818
0.000784999	0.0719536
0.000785999	0.0719084
0.000786999	0.0718576
0.000787999	0.0718237
0.000788999	0.0718012
0.000789999	0.0717729
0.000790999	0.0717447
0.000791999	0.0716883
0.000792999	0.0716374
0.000793999	0.0716149
0.000794999	0.071581
0.000795999	0.0715584
0.000796999	0.0715132
0.000797999	0.0714568
0.000798999	0.0714286
0.000799999	0.0713947
0.000800999	0.0713552
0.000801999	0.0713326
0.000802999	0.0713213
0.000803999	0.07131
0.000804999	0.0712762
0.000805999	0.071231
0.000806999	0.0712028
0.000807999	0.0711858
0.000808999	0.0711576
0.000809999	0.0711068
0.000810999	0.071056
0.000811999	0.0710165
0.000812999	0.0709882
0.000813999	0.0709544
0.000814999	0.0709205
0.000815999	0.0708923
0.000816999	0.0708697
0.000817999	0.0708528
0.000818999	0.0708302
0.000819999	0.0708076
0.000820999	0.070785
0.000821999	0.0707511
0.000822999	0.0707003
0.000824999	0.0706608
0.000825999	0.0706326
0.000826999	0.07061
0.000827999	0.0705874
0.000830999	0.0705592
0.000831999	0.070531
0.000832999	0.0705084
0.000833999	0.0704802
0.000834999	0.070452
0.000835999	0.070435
0.000836999	0.0704068
0.000837999	0.0703616
0.000838999	0.0703165
0.000839999	0.0702882
0.000840999	0.0702657
0.000841999	0.0702487
0.000842999	0.0702092
0.000843999	0.070164
0.000844999	0.0701415
0.000845999	0.070102
0.000846999	0.0700624
0.000847999	0.0700229
0.000848999	0.0699721
0.000849999	0.069927
0.000851999	0.0698818
0.000852999	0.0698423
0.000854999	0.0697915
0.000855999	0.069752
0.000856999	0.069735
0.000857999	0.0697181
0.000858999	0.0696955
0.000859999	0.0696729
0.000860999	0.0696447
0.000861999	0.0695939
0.000862999	0.0695487
0.000863999	0.0694979
0.000864999	0.0694471
0.000865999	0.0694189
0.000866999	0.0693963
0.000867999	0.0693624
0.000868999	0.0693173
0.000869999	0.0692721
0.000870999	0.0692382
0.000871999	0.0692213
0.000872999	0.0692044
0.000873999	0.0691649
0.000874999	0.0691197
0.000875999	0.0690971
0.000876999	0.0690745
0.000877999	0.0690519
0.000878999	0.0690294
0.000879999	0.0689955
0.000880999	0.0689673
0.000881999	0.068939
0.000882999	0.0689108
0.000883999	0.0688939
0.000884999	0.0688769
0.000885999	0.06886
0.000886999	0.0688318
0.000887999	0.0687866
0.000888999	0.0687415
0.000890999	0.0686963
0.000891999	0.0686624
0.000892999	0.0686286
0.000893999	0.0686003
0.000894999	0.0685778
0.000895999	0.0685439
0.000896999	0.06851
0.000897999	0.0684761
0.000898999	0.0684479
0.000899999	0.0684253
0.000900999	0.0683915
0.000901999	0.0683576
0.000903999	0.0683294
0.000904999	0.0683011
0.000905999	0.0682842
0.000906999	0.0682616
0.000907999	0.0682221
0.000908999	0.0681882
0.000909999	0.0681713
0.000910999	0.0681487
0.000911999	0.0681205
0.000912999	0.0680923
0.000914999	0.0680584
0.000915999	0.0680189
0.000916999	0.0679794
0.000917999	0.0679342
0.000918999	0.0678947
0.000919999	0.0678777
0.000920999	0.0678495
0.000921999	0.0678044
0.000922999	0.0677648
0.000924999	0.0677366
0.000925999	0.0677027
0.000926999	0.0676632
0.000927999	0.067635
0.000928999	0.0676068
0.000930999	0.0675729
0.000931999	0.0675221
0.000932999	0.0674769
0.000933999	0.0674431
0.000934999	0.0674148
0.000935999	0.0674036
0.000936999	0.0673923
0.000937999	0.0673753
0.000938999	0.0673527
0.000939999	0.0673132
0.000940999	0.0672737
0.000941999	0.0672455
0.000942999	0.0672116
0.000943999	0.0671777
0.000944999	0.0671326
0.000945999	0.0670874
0.000946999	0.0670648
0.000947999	0.0670423
0.000948999	0.0670197
0.000949999	0.0670027
0.000950999	0.0669802
0.000951999	0.0669576
0.000952999	0.0669237
0.000953999	0.0668673
0.000954999	0.0668221
0.000955999	0.0667826
0.000956999	0.0667431
0.000957999	0.0667148
0.000958999	0.066681
0.000959999	0.0666527
0.000960999	0.0666358
0.000961999	0.0666245
0.000962999	0.0665906
0.000964999	0.0665511
0.000965999	0.0665285
0.000966999	0.0665003
0.000967999	0.0664721
0.000969999	0.0664495
0.000970999	0.0664326
0.000971999	0.0664156
0.000972999	0.0663987
0.000973999	0.0663818
0.000974999	0.0663592
0.000975999	0.0663366
0.000977999	0.0663084
0.000978999	0.0662745
0.000979999	0.0662463
0.000980999	0.0662237
0.000981999	0.0662011
0.000983999	0.0661673
0.000984999	0.0661221
0.000985999	0.0660939
0.000986999	0.06606
0.000987999	0.0660205
0.000988999	0.0660035
0.000989999	0.0659866
0.000990999	0.0659584
0.000991999	0.0659302
0.000992999	0.0658906
0.000993999	0.0658285
0.000994999	0.0657721
0.000995999	0.0657156
0.000996999	0.0656535
0.000997999	0.0656084
0.000998999	0.0655802
0.000999999	0.0655632
0.001001	0.0655406
0.001002	0.0655181
0.001003	0.0655011
0.001004	0.0654729
0.001005	0.0654503
0.001006	0.0654334
0.001007	0.0654164
0.001008	0.0653939
0.001009	0.0653543
0.00101	0.0653035
0.001011	0.0652697
0.001012	0.0652471
0.001013	0.0652189
0.001014	0.0652019
0.001015	0.0651793
0.001016	0.0651511
0.001017	0.0651173
0.001019	0.0650777
0.001021	0.0650439
0.001022	0.06501
0.001023	0.0649761
0.001024	0.0649535
0.001025	0.0649253
0.001026	0.0648971
0.001027	0.0648745
0.001028	0.0648519
0.001029	0.0648406
0.00103	0.0648293
0.001031	0.0648181
0.001032	0.0648011
0.001033	0.0647785
0.001034	0.064756
0.001035	0.0647334
0.001036	0.0647052
0.001037	0.0646826
0.001038	0.0646713
0.001039	0.0646543
0.00104	0.0646318
0.001043	0.0646092
0.001044	0.0645922
0.001045	0.064581
0.001046	0.064564
0.001047	0.0645358
0.001048	0.0645076
0.001049	0.0644793
0.00105	0.0644455
0.001051	0.0644003
0.001052	0.0643552
0.001053	0.0642987
0.001054	0.0642479
0.001055	0.0642253
0.001056	0.0642027
0.001057	0.0641801
0.001058	0.0641632
0.001059	0.0641463
0.00106	0.0641181
0.001061	0.0640955
0.001062	0.0640729
0.001063	0.0640447
0.001064	0.0640277
0.001065	0.0640108
0.001066	0.0639826
0.001068	0.0639543
0.001069	0.0639374
0.00107	0.0639261
0.001071	0.0639035
0.001072	0.063881
0.001073	0.0638527
0.001074	0.0638076
0.001075	0.0637793
0.001076	0.0637511
0.001077	0.0637172
0.001078	0.0636947
0.001079	0.0636721
0.00108	0.0636495
0.001081	0.06361
0.001082	0.0635761
0.001083	0.0635648
0.001084	0.0635535
0.001085	0.0635366
0.001087	0.063514
0.001088	0.0634971
0.001089	0.0634689
0.00109	0.0634124
0.001091	0.0633729
0.001092	0.0633503
0.001093	0.0633108
0.001094	0.0632826
0.001095	0.0632713
0.001096	0.0632543
0.001097	0.0632374
0.001098	0.0632148
0.0011	0.0631866
0.001101	0.0631584
0.001102	0.0631189
0.001104	0.063085
0.001105	0.0630624
0.001107	0.0630455
0.001108	0.0630342
0.001109	0.0630172
0.00111	0.0629947
0.001111	0.0629664
0.001112	0.0629439
0.001113	0.0629043
0.001115	0.0628535
0.001116	0.0628309
0.001117	0.0628027
0.001118	0.0627689
0.001119	0.0627463
0.00112	0.062718
0.001121	0.0626898
0.001122	0.0626616
0.001123	0.0626334
0.001125	0.0626051
0.001126	0.0625826
0.001127	0.0625543
0.001128	0.0625205
0.001129	0.0624979
0.00113	0.0624809
0.001131	0.0624527
0.001134	0.0624245
0.001135	0.0624132
0.001136	0.0623963
0.001137	0.0623568
0.001138	0.0623172
0.001139	0.0622777
0.00114	0.0622269
0.001141	0.0621987
0.001142	0.0621705
0.001143	0.0621422
0.001144	0.0621253
0.001147	0.0620971
0.001148	0.0620688
0.001149	0.0620463
0.00115	0.0620237
0.001152	0.0619785
0.001153	0.0619164
0.001156	0.0618769
0.001157	0.0618543
0.001158	0.0618318
0.001159	0.0618035
0.00116	0.0617809
0.001161	0.061764
0.001163	0.0617414
0.001164	0.0617245
0.001166	0.0617019
0.001167	0.0616793
0.001168	0.0616624
0.001169	0.0616455
0.001171	0.0616285
0.001173	0.0615947
0.001175	0.0615608
0.001176	0.0615438
0.001178	0.0615156
0.001179	0.0614817
0.00118	0.0614648
0.001181	0.0614535
0.001183	0.0614366
0.001184	0.0614084
0.001186	0.0613858
0.001187	0.0613632
0.001188	0.0613406
0.001189	0.0613237
0.00119	0.0612785
0.001192	0.0612277
0.001194	0.0611938
0.001195	0.06116
0.001196	0.0611317
0.001197	0.0611148
0.001198	0.0611035
0.001199	0.0610922
0.0012	0.0610809
0.001201	0.0610697
0.001202	0.0610471
0.001203	0.0610245
0.001205	0.0609963
0.001206	0.060968
0.001207	0.0609398
0.001209	0.0609116
0.00121	0.0609003
0.001211	0.0608777
0.001213	0.0608551
0.001214	0.0608438
0.001215	0.0608326
0.001216	0.0608156
0.001219	0.0607987
0.00122	0.0607874
0.001221	0.0607705
0.001222	0.0607479
0.001224	0.0607196
0.001225	0.0606858
0.001226	0.0606463
0.001227	0.0606067
0.001228	0.0605729
0.001229	0.0605334
0.00123	0.0604995
0.001231	0.0604826
0.001232	0.0604713
0.001233	0.0604543
0.001234	0.0604317
0.001236	0.0604148
0.001237	0.0603979
0.001238	0.0603696
0.001239	0.0603414
0.00124	0.0603245
0.001241	0.0603132
0.001242	0.0602963
0.001243	0.060268
0.001244	0.0602455
0.001247	0.0602229
0.001248	0.0601946
0.001249	0.0601777
0.00125	0.0601608
0.001251	0.0601382
0.001253	0.0601156
0.001254	0.0600987
0.001255	0.0600817
0.001256	0.0600648
0.001257	0.0600535
0.001258	0.0600366
0.001259	0.0600196
0.00126	0.0600084
0.001261	0.0599971
0.001262	0.0599858
0.001263	0.0599688
0.001265	0.0599519
0.001266	0.059935
0.001267	0.0599011
0.001268	0.0598616
0.001269	0.0598334
0.001271	0.0597995
0.001272	0.0597713
0.001273	0.0597543
0.001275	0.0597261
0.001276	0.0596922
0.001277	0.059664
0.001278	0.0596471
0.001279	0.0596358
0.00128	0.0596132
0.001281	0.0595906
0.001282	0.0595737
0.001283	0.0595454
0.001284	0.0595229
0.001285	0.0595003
0.001287	0.0594777
0.001288	0.0594495
0.001289	0.05941
0.00129	0.0593874
0.001291	0.0593761
0.001292	0.0593648
0.001293	0.0593479
0.001294	0.0593309
0.001295	0.0593196
0.001296	0.0592971
0.001297	0.0592688
0.001298	0.0592519
0.0013	0.059235
0.001301	0.059218
0.001302	0.0591954
0.001303	0.0591672
0.001304	0.0591503
0.001305	0.059139
0.001306	0.0591221
0.001307	0.0591051
0.001308	0.0590938
0.001309	0.0590825
0.001311	0.0590713
0.001312	0.0590487
0.001314	0.0590092
0.001315	0.0589809
0.001318	0.0589696
0.001319	0.0589583
0.00132	0.0589471
0.001321	0.0589358
0.001323	0.0589245
0.001327	0.0589075
0.001328	0.0588737
0.00133	0.0588342
0.001331	0.0588003
0.001332	0.0587721
0.001334	0.0587495
0.001335	0.0587325
0.001336	0.0587213
0.001337	0.05871
0.001338	0.0586987
0.001341	0.0586704
0.001342	0.0586366
0.001344	0.058614
0.001346	0.0585914
0.001347	0.0585632
0.001348	0.0585406
0.001349	0.058518
0.00135	0.0584898
0.001351	0.0584672
0.001352	0.058439
0.001354	0.0584108
0.001355	0.0583938
0.001357	0.0583825
0.001358	0.0583656
0.001359	0.0583487
0.00136	0.0583374
0.001361	0.0583204
0.001362	0.0583035
0.001363	0.0582866
0.001365	0.0582583
0.001366	0.0582301
0.001367	0.0582132
0.001368	0.0582019
0.001369	0.058185
0.00137	0.058168
0.001371	0.0581567
0.001372	0.0581454
0.001373	0.0581229
0.001375	0.0581003
0.001376	0.0580721
0.001377	0.0580438
0.001378	0.0580269
0.001379	0.05801
0.00138	0.0579987
0.001382	0.0579874
0.001383	0.0579761
0.001385	0.0579422
0.001387	0.0579027
0.00139	0.0578858
0.001391	0.0578688
0.001392	0.057835
0.001394	0.0577954
0.001395	0.0577729
0.001396	0.0577559
0.001397	0.0577277
0.001399	0.0576938
0.001401	0.0576487
0.001403	0.0576148
0.001404	0.0575866
0.001406	0.0575471
0.001408	0.0575188
0.001409	0.0574962
0.001411	0.0574793
0.001412	0.057468
0.001414	0.0574511
0.001415	0.0574285
0.001418	0.0574116
0.001419	0.057389
0.00142	0.0573495
0.001421	0.0573212
0.001423	0.05731
0.001424	0.057293
0.001426	0.0572761
0.001427	0.0572535
0.001428	0.0572253
0.001429	0.0572027
0.00143	0.0571858
0.001431	0.0571688
0.001432	0.0571406
0.001433	0.057118
0.001435	0.0571011
0.001436	0.0570729
0.001437	0.0570503
0.001439	0.0570221
0.001441	0.0569938
0.001442	0.0569712
0.001443	0.0569487
0.001444	0.0569204
0.001445	0.0568922
0.001446	0.0568809
0.001448	0.056864
0.001449	0.0568358
0.00145	0.0568132
0.001451	0.0567962
0.001452	0.0567793
0.001454	0.056768
0.001455	0.0567511
0.001456	0.0567229
0.001457	0.0567003
0.001458	0.056689
0.001459	0.056672
0.00146	0.0566495
0.001461	0.0566212
0.001462	0.0565987
0.001463	0.0565761
0.001465	0.0565479
0.001466	0.0565309
0.001467	0.0565196
0.001468	0.0565027
0.00147	0.0564745
0.001471	0.0564462
0.001472	0.056418
0.001474	0.0563954
0.001475	0.0563841
0.001478	0.0563729
0.001479	0.0563559
0.00148	0.056339
0.001481	0.0563277
0.001482	0.0563108
0.001483	0.0562882
0.001486	0.0562656
0.001488	0.0562374
0.001489	0.0562091
0.00149	0.0561866
0.001491	0.056164
0.001492	0.0561414
0.001493	0.0561188
0.001494	0.0561019
0.001495	0.0560737
0.001496	0.0560341
0.001497	0.0560059
0.001498	0.0559833
0.001499	0.0559608
0.0015	0.0559325
0.001501	0.0559099
0.001503	0.055893
0.001504	0.0558761
0.001505	0.0558535
0.001508	0.0558253
0.001509	0.0558083
0.001511	0.055797
0.001512	0.0557858
0.001513	0.0557688
0.001514	0.0557519
0.001515	0.0557406
0.001516	0.055718
0.001517	0.0556954
0.001518	0.0556729
0.001519	0.0556503
0.00152	0.0556164
0.001522	0.0555825
0.001523	0.0555656
0.001524	0.055543
0.001525	0.0555204
0.001526	0.0554922
0.001527	0.055464
0.001529	0.0554245
0.00153	0.0553849
0.001531	0.055368
0.001532	0.0553511
0.001533	0.0553341
0.001534	0.0553172
0.001535	0.0553003
0.001536	0.0552833
0.001537	0.0552608
0.001538	0.0552325
0.001539	0.0552099
0.001542	0.0551874
0.001546	0.0551535
0.001548	0.0551309
0.001549	0.0551196
0.00155	0.0551083
0.001551	0.0550914
0.001553	0.0550745
0.001554	0.0550632
0.001556	0.0550519
0.001557	0.0550406
0.001561	0.0550293
0.001563	0.0550124
0.001565	0.0549898
0.001567	0.0549728
0.001568	0.0549616
0.001569	0.0549446
0.001571	0.054922
0.001572	0.0548995
0.001573	0.0548769
0.001574	0.0548543
0.001575	0.0548317
0.001577	0.0548091
0.001578	0.0547922
0.00158	0.0547753
0.001584	0.0547527
0.001585	0.0547245
0.00159	0.0547019
0.001591	0.0546793
0.001592	0.0546567
0.001594	0.0546454
0.001597	0.0546285
0.001599	0.0546116
0.001601	0.0545946
0.001602	0.0545777
0.001605	0.0545664
0.001606	0.0545551
0.001607	0.0545438
0.001608	0.0545269
0.00161	0.0545099
0.001611	0.054493
0.001612	0.0544761
0.001614	0.0544648
0.001615	0.0544535
0.001616	0.0544366
0.001617	0.054414
0.00162	0.054397
0.001622	0.0543801
0.001624	0.0543575
0.001626	0.0543349
0.001627	0.0543124
0.00163	0.0542954
0.001633	0.0542841
0.001634	0.0542728
0.001635	0.0542559
0.001638	0.054239
0.001639	0.0542277
0.00164	0.0542164
0.001641	0.0541995
0.001643	0.0541825
0.001644	0.0541599
0.001645	0.0541374
0.001647	0.0541148
0.001648	0.0540922
0.00165	0.0540753
0.001651	0.0540527
0.001653	0.0540301
0.001654	0.0540132
0.001656	0.0540019
0.001657	0.0539906
0.001658	0.0539736
0.001659	0.0539567
0.00166	0.0539454
0.001661	0.0539341
0.001663	0.0539172
0.001664	0.0538946
0.001665	0.053872
0.001666	0.0538551
0.001668	0.0538325
0.001669	0.0538043
0.001671	0.0537874
0.001672	0.0537704
0.001674	0.0537535
0.001675	0.0537422
0.001676	0.0537309
0.001678	0.053714
0.001679	0.053697
0.00168	0.0536857
0.001681	0.0536632
0.001682	0.0536406
0.001683	0.0536293
0.001684	0.0536067
0.001685	0.0535785
0.001686	0.0535446
0.001687	0.0534995
0.001688	0.0534656
0.001691	0.053443
0.001693	0.0534261
0.001695	0.0534035
0.001696	0.0533753
0.001697	0.0533527
0.001698	0.0533301
0.001701	0.0533132
0.001702	0.0532962
0.001704	0.053268
0.001705	0.0532454
0.001706	0.0532285
0.001707	0.0532115
0.00171	0.0532003
0.001713	0.053189
0.001717	0.053172
0.001718	0.0531382
0.001721	0.053093
0.001722	0.0530591
0.001723	0.0530422
0.001724	0.0530309
0.001725	0.053014
0.001727	0.052997
0.001728	0.0529632
0.001729	0.0529293
0.00173	0.0529067
0.001731	0.0528785
0.001735	0.0528559
0.001736	0.052839
0.001739	0.052822
0.001741	0.0528051
0.001742	0.0527938
0.001744	0.0527825
0.001746	0.0527712
0.001747	0.0527599
0.001748	0.052743
0.001749	0.0527261
0.00175	0.0527148
0.001751	0.0527035
0.001753	0.0526922
0.001754	0.0526809
0.001755	0.052664
0.001756	0.0526414
0.001758	0.0526132
0.001761	0.0525736
0.001763	0.0525454
0.001764	0.0525341
0.001765	0.0525228
0.001766	0.0525059
0.001768	0.0524833
0.00177	0.0524664
0.001772	0.0524438
0.001773	0.0524156
0.001774	0.052393
0.001775	0.0523761
0.001776	0.0523648
0.001777	0.0523535
0.001778	0.0523422
0.00178	0.0523309
0.001784	0.052314
0.001785	0.052297
0.001786	0.0522857
0.001787	0.0522632
0.001788	0.0522406
0.001789	0.0522236
0.001791	0.0522011
0.001792	0.0521841
0.001793	0.0521728
0.001796	0.0521559
0.001799	0.052139
0.0018	0.0521277
0.001802	0.0521164
0.001803	0.0521051
0.001804	0.0520938
0.001805	0.0520769
0.001808	0.0520599
0.001809	0.0520373
0.00181	0.0520091
0.001814	0.0519922
0.001817	0.0519809
0.001818	0.0519583
0.00182	0.0519301
0.001821	0.0519019
0.001822	0.0518736
0.001826	0.0518567
0.001828	0.0518341
0.001829	0.0518003
0.00183	0.051772
0.001834	0.0517551
0.001839	0.0517382
0.00184	0.0517212
0.001841	0.0517043
0.001842	0.0516873
0.001843	0.0516704
0.001846	0.0516535
0.00185	0.0516422
0.001851	0.0516309
0.001852	0.0516196
0.001854	0.0516027
0.001855	0.0515857
0.001856	0.0515744
0.001857	0.0515632
0.001858	0.0515519
0.00186	0.0515406
0.001861	0.0515293
0.001864	0.0515123
0.001866	0.0514954
0.001867	0.0514841
0.001868	0.0514728
0.00187	0.0514502
0.001871	0.051422
0.001872	0.0514051
0.001873	0.0513938
0.001874	0.0513825
0.001877	0.0513712
0.001878	0.0513599
0.001879	0.051343
0.00188	0.0513261
0.001881	0.0513148
0.001882	0.0513035
0.001883	0.0512865
0.001885	0.0512696
0.001887	0.0512583
0.001891	0.051247
0.001892	0.0512357
0.001893	0.0512244
0.001894	0.0512075
0.001895	0.0511849
0.001897	0.0511623
0.001898	0.0511398
0.001899	0.0511228
0.001901	0.0511115
0.001903	0.0511002
0.001904	0.0510833
0.001906	0.0510607
0.001907	0.0510438
0.001908	0.0510325
0.00191	0.0510212
0.001912	0.0510099
0.001913	0.050993
0.001915	0.0509761
0.00192	0.0509648
0.001921	0.0509535
0.001923	0.0509422
0.001928	0.0509252
0.00193	0.0509083
0.001931	0.0508857
0.001932	0.0508631
0.001933	0.0508519
0.001934	0.0508406
0.001935	0.0508293
0.001936	0.0508123
0.001937	0.0507954
0.001939	0.0507728
0.001941	0.0507446
0.001942	0.0507277
0.001946	0.0507051
0.001947	0.0506769
0.001948	0.0506543
0.00195	0.0506261
0.001952	0.0505978
0.001953	0.0505752
0.001955	0.0505583
0.001959	0.0505414
0.001961	0.0505244
0.001962	0.0505131
0.001963	0.0504962
0.001964	0.0504736
0.001965	0.0504567
0.001966	0.0504454
0.001968	0.0504341
0.001971	0.0504172
0.001972	0.0504002
0.001973	0.0503833
0.001974	0.0503607
0.001975	0.0503381
0.001976	0.0503212
0.001977	0.0503099
0.001979	0.050293
0.00198	0.0502648
0.001981	0.0502422
0.001982	0.0502309
0.001988	0.0502196
0.001989	0.0502083
0.001991	0.050197
0.001992	0.0501744
0.001995	0.0501519
0.001996	0.0501406
0.002	0.0501293
0.002001	0.050118
0.002002	0.050101
0.002004	0.0500785
0.002005	0.0500615
0.002006	0.0500502
0.002009	0.050039
0.00201	0.0500277
0.002011	0.0500164
0.002012	0.0500051
0.002014	0.0499938
0.002016	0.0499825
0.002018	0.0499712
0.002019	0.0499599
0.00202	0.0499486
0.002024	0.0499373
0.002025	0.049926
0.002028	0.0498978
0.00203	0.0498696
0.002031	0.049847
0.002032	0.0498244
0.002033	0.0498131
0.002037	0.0497962
0.002038	0.049768
0.00204	0.0497454
0.002042	0.0497341
0.002043	0.0497172
0.002048	0.0497002
0.002051	0.049689
0.002054	0.049672
0.002055	0.0496494
0.002058	0.0496325
0.00206	0.0496212
0.002063	0.0496099
0.002069	0.049576
0.00207	0.0495365
0.002071	0.0495196
0.002072	0.0495083
0.002073	0.049497
0.002074	0.0494857
0.002075	0.0494744
0.002078	0.0494575
0.002079	0.0494293
0.002081	0.0494067
0.002082	0.0493954
0.002083	0.0493841
0.002085	0.0493728
0.002087	0.0493615
0.002088	0.0493502
0.002089	0.0493389
0.002091	0.049322
0.002092	0.0493051
0.002097	0.0492881
0.002098	0.0492712
0.002102	0.0492543
0.002103	0.0492317
0.002105	0.0492148
0.002106	0.0492035
0.002108	0.0491922
0.002109	0.0491809
0.00211	0.0491527
0.002112	0.0491244
0.002114	0.0491131
0.002117	0.0490962
0.002118	0.0490793
0.00212	0.0490623
0.002123	0.0490398
0.002127	0.0490228
0.002128	0.0490002
0.002129	0.0489777
0.00213	0.0489607
0.002131	0.0489438
0.002132	0.0489325
0.002134	0.0489212
0.002136	0.0489099
0.002137	0.048893
0.002138	0.048876
0.002139	0.0488591
0.00214	0.0488365
0.002142	0.0488139
0.002143	0.048797
0.002144	0.0487801
0.002147	0.0487631
0.002148	0.0487518
0.00215	0.0487349
0.002152	0.048718
0.002153	0.0487067
0.002154	0.0486954
0.002155	0.0486841
0.002157	0.0486728
0.002161	0.0486615
0.002163	0.0486502
0.002168	0.0486333
0.00217	0.0486107
0.002172	0.0485938
0.002173	0.0485825
0.002174	0.0485599
0.002175	0.0485373
0.002176	0.0485148
0.002177	0.0484922
0.002181	0.0484809
0.002183	0.0484696
0.002184	0.0484583
0.002185	0.048447
0.002189	0.0484357
0.00219	0.0484244
0.002192	0.0484131
0.002198	0.0483962
0.0022	0.0483736
0.002201	0.048351
0.002204	0.0483341
0.002206	0.0483228
0.002207	0.0483115
0.002208	0.0482946
0.002209	0.048272
0.002211	0.0482551
0.002212	0.0482438
0.002213	0.0482325
0.002217	0.0482099
0.002218	0.0481817
0.002219	0.0481647
0.00222	0.0481478
0.002221	0.0481309
0.002222	0.0481196
0.002223	0.0481083
0.002228	0.048097
0.00223	0.0480857
0.002233	0.0480688
0.002236	0.0480518
0.002239	0.0480406
0.002243	0.0480293
0.002244	0.048018
0.002246	0.0479897
0.002247	0.0479615
0.002249	0.0479446
0.00225	0.0479277
0.002251	0.0479164
0.002252	0.0479051
0.002254	0.0478881
0.002255	0.0478712
0.002257	0.0478599
0.002258	0.0478486
0.00226	0.0478373
0.002261	0.0478204
0.002263	0.0478035
0.002269	0.0477922
0.00227	0.0477809
0.002273	0.0477583
0.002278	0.0477357
0.002279	0.0477244
0.00228	0.0477075
0.002283	0.0476906
0.002285	0.0476736
0.002286	0.047651
0.002288	0.0476341
0.002292	0.0476228
0.002295	0.0476115
0.002296	0.0475946
0.002297	0.0475776
0.002298	0.0475551
0.002299	0.0475325
0.0023	0.0475212
0.002301	0.0475099
0.002303	0.0474986
0.002305	0.0474817
0.002308	0.0474647
0.002313	0.0474535
0.002314	0.0474422
0.002315	0.0474309
0.002318	0.0474196
0.002319	0.047397
0.00232	0.0473744
0.002321	0.0473631
0.002323	0.0473518
0.002326	0.0473406
0.002327	0.0473293
0.002329	0.047318
0.00233	0.0473067
0.002332	0.0472954
0.002333	0.0472785
0.002334	0.0472559
0.002336	0.0472333
0.002342	0.0472164
0.002347	0.0471994
0.002348	0.0471712
0.002351	0.0471486
0.002354	0.0471373
0.002355	0.047126
0.002356	0.0471147
0.002357	0.0471035
0.00236	0.0470922
0.002362	0.0470809
0.002363	0.0470696
0.002364	0.0470583
0.002366	0.047047
0.002367	0.0470301
0.00237	0.0470075
0.002371	0.0469905
0.002375	0.0469793
0.002376	0.046968
0.002378	0.0469567
0.002379	0.0469454
0.002382	0.0469341
0.002383	0.0469228
0.002384	0.0469115
0.00239	0.0468946
0.002394	0.0468776
0.002395	0.0468607
0.002396	0.0468438
0.002401	0.0468268
0.002404	0.0468099
0.002405	0.0467986
0.00241	0.0467873
0.002411	0.046776
0.002415	0.0467591
0.002416	0.0467422
0.002419	0.0467309
0.002425	0.0467196
0.002429	0.0467083
0.002431	0.0466914
0.002433	0.0466744
0.002436	0.0466631
0.002437	0.0466518
0.002443	0.0466349
0.002444	0.0466123
0.002446	0.0465897
0.002449	0.0465728
0.002451	0.0465615
0.002452	0.0465502
0.002454	0.0465333
0.002458	0.0465164
0.00246	0.0464994
0.002462	0.0464825
0.002463	0.0464655
0.002464	0.0464486
0.002468	0.0464373
0.002469	0.0464147
0.002473	0.0463922
0.002474	0.0463752
0.002478	0.0463526
0.002481	0.0463301
0.002483	0.0463075
0.002484	0.0462905
0.002485	0.0462736
0.002486	0.0462567
0.002491	0.0462397
0.002492	0.0462115
0.002496	0.0461889
0.0025	0.046172
0.002501	0.0461551
0.002505	0.0461381
0.002506	0.0461212
0.002507	0.0461099
0.002508	0.046093
0.002509	0.046076
0.002512	0.0460647
0.002513	0.0460534
0.002514	0.0460365
0.002519	0.0460196
0.002522	0.0460026
0.002523	0.0459857
0.002525	0.0459744
0.002526	0.0459631
0.002527	0.0459518
0.00253	0.0459405
0.002533	0.0459293
0.002537	0.045918
0.002539	0.0459067
0.00254	0.0458954
0.002542	0.0458784
0.002543	0.0458559
0.002545	0.0458389
0.002546	0.045822
0.002547	0.0458051
0.002548	0.0457938
0.002549	0.0457825
0.002551	0.0457712
0.002553	0.0457599
0.002554	0.0457486
0.002556	0.0457373
0.002558	0.045726
0.00256	0.0457147
0.002562	0.0457034
0.002564	0.0456922
0.002567	0.0456809
0.002568	0.0456639
0.00257	0.0456413
0.002572	0.0456244
0.002573	0.0456075
0.002575	0.0455905
0.002576	0.0455793
0.002577	0.045568
0.002579	0.0455567
0.002582	0.0455454
[truncated: 3,767 more rows]

## Sheet: s=0.15
0	0.993476
9.99999e-07	0.856433
2e-06	0.67397
3e-06	0.589154
4e-06	0.533513
5e-06	0.493694
5.99999e-06	0.463302
6.99999e-06	0.438916
7.99999e-06	0.418657
8.99999e-06	0.401454
9.99999e-06	0.38642
1.1e-05	0.373307
1.2e-05	0.361987
1.3e-05	0.352255
1.4e-05	0.343438
1.5e-05	0.334834
1.6e-05	0.32667
1.7e-05	0.319447
1.8e-05	0.312888
1.9e-05	0.306552
2e-05	0.300551
2.1e-05	0.295215
2.2e-05	0.290489
2.3e-05	0.285705
2.4e-05	0.281068
2.5e-05	0.277054
2.6e-05	0.273198
2.7e-05	0.269419
2.8e-05	0.265986
2.9e-05	0.262819
3e-05	0.259751
3.1e-05	0.256718
3.2e-05	0.253908
3.3e-05	0.251305
3.4e-05	0.248636
3.5e-05	0.245892
3.6e-05	0.243194
3.7e-05	0.240861
3.8e-05	0.23868
3.9e-05	0.236435
4e-05	0.234249
4.1e-05	0.232145
4.2e-05	0.230123
4.3e-05	0.228265
4.4e-05	0.226679
4.5e-05	0.225004
4.6e-05	0.223135
4.7e-05	0.22126
4.8e-05	0.219402
4.9e-05	0.217674
5e-05	0.216111
5.09999e-05	0.214589
5.19999e-05	0.213025
5.29999e-05	0.211427
5.39999e-05	0.209858
5.49999e-05	0.208435
5.59999e-05	0.207101
5.69999e-05	0.205732
5.79999e-05	0.204491
5.89999e-05	0.203287
5.99999e-05	0.202005
6.09999e-05	0.200718
6.19999e-05	0.199602
6.29999e-05	0.198526
6.39999e-05	0.197315
6.49999e-05	0.19611
6.59999e-05	0.194882
6.69999e-05	0.193677
6.79999e-05	0.19256
6.89999e-05	0.191538
6.99999e-05	0.190574
7.09999e-05	0.189598
7.19999e-05	0.188628
7.29999e-05	0.187759
7.39999e-05	0.186865
7.49999e-05	0.18586
7.59999e-05	0.184873
7.69999e-05	0.183938
7.79999e-05	0.18308
7.89999e-05	0.182299
7.99999e-05	0.181511
8.09999e-05	0.180641
8.19999e-05	0.179736
8.29999e-05	0.178866
8.39999e-05	0.178084
8.49999e-05	0.17735
8.59999e-05	0.176545
8.69999e-05	0.175781
8.79999e-05	0.175063
8.89999e-05	0.174276
8.99999e-05	0.173565
9.09999e-05	0.172877
9.19999e-05	0.172154
9.29999e-05	0.171396
9.39999e-05	0.170702
9.49999e-05	0.170156
9.59999e-05	0.169439
9.69999e-05	0.168657
9.79999e-05	0.167981
9.89999e-05	0.167335
9.99999e-05	0.166653
0.000101	0.165954
0.000102	0.165325
0.000103	0.164672
0.000104	0.164014
0.000105	0.163385
0.000106	0.162803
0.000107	0.162251
0.000108	0.161781
0.000109	0.161346
0.00011	0.160776
0.000111	0.160188
0.000112	0.159553
0.000113	0.158848
0.000114	0.158231
0.000115	0.157766
0.000116	0.157367
0.000117	0.156844
0.000118	0.156274
0.000119	0.155739
0.00012	0.155216
0.000121	0.154692
0.000122	0.154146
0.000123	0.153611
0.000124	0.153088
0.000125	0.152659
0.000126	0.152242
0.000127	0.151783
0.000128	0.151372
0.000129	0.150966
0.00013	0.150549
0.000131	0.150102
0.000132	0.14965
0.000133	0.149162
0.000134	0.148645
0.000135	0.148192
0.000136	0.147792
0.000137	0.147399
0.000138	0.147017
0.000139	0.146588
0.00014	0.146206
0.000141	0.145888
0.000142	0.145483
0.000143	0.145048
0.000144	0.144695
0.000145	0.14436
0.000146	0.143984
0.000147	0.143584
0.000148	0.143202
0.000149	0.142902
0.00015	0.142556
0.000151	0.142174
0.000152	0.141833
0.000153	0.141463
0.000154	0.141098
0.000155	0.140804
0.000156	0.14054
0.000157	0.140228
0.000158	0.139911
0.000159	0.139623
0.00016	0.1393
0.000161	0.138918
0.000162	0.138541
0.000163	0.138224
0.000164	0.137889
0.000165	0.137536
0.000166	0.137237
0.000167	0.136972
0.000168	0.136678
0.000169	0.13642
0.00017	0.136191
0.000171	0.135903
0.000172	0.135597
0.000173	0.13525
0.000174	0.134886
0.000175	0.134562
0.000176	0.134316
0.000177	0.134063
0.000178	0.133781
0.000179	0.133604
0.00018	0.133452
0.000181	0.133211
0.000182	0.132923
0.000183	0.132635
0.000184	0.132358
0.000185	0.132112
0.000186	0.131818
0.000187	0.1315
0.000188	0.131207
0.000189	0.130936
0.00019	0.130678
0.000191	0.130425
0.000192	0.130213
0.000193	0.129984
0.000194	0.129778
0.000195	0.12959
0.000196	0.129367
0.000197	0.129144
0.000198	0.128903
0.000199	0.128656
0.0002	0.128474
0.000201	0.128285
0.000202	0.128033
0.000203	0.127845
0.000204	0.127692
0.000205	0.127492
0.000206	0.127257
0.000207	0.12701
0.000208	0.126804
0.000209	0.126634
0.00021	0.126469
0.000211	0.126299
0.000212	0.126081
0.000213	0.125852
0.000214	0.125652
0.000215	0.125458
0.000216	0.125259
0.000217	0.125065
0.000218	0.124882
0.000219	0.124624
0.00022	0.124365
0.000221	0.124183
0.000222	0.124013
0.000223	0.123819
0.000224	0.123636
0.000225	0.123478
0.000226	0.123296
0.000227	0.12309
0.000228	0.122872
0.000229	0.122643
0.00023	0.122443
0.000231	0.122296
0.000232	0.122167
0.000233	0.122032
0.000234	0.121867
0.000235	0.121703
0.000236	0.121521
0.000237	0.121356
0.000238	0.121197
0.000239	0.120927
0.00024	0.120692
0.000241	0.120516
0.000242	0.12031
0.000243	0.120116
0.000244	0.119916
0.000245	0.119728
0.000246	0.119581
0.000247	0.119434
0.000248	0.119246
0.000249	0.119052
0.00025	0.118876
0.000251	0.118694
0.000252	0.118517
0.000253	0.118382
0.000254	0.118235
0.000255	0.118065
0.000256	0.117912
0.000257	0.117759
0.000258	0.117565
0.000259	0.117383
0.00026	0.117183
0.000261	0.116954
0.000262	0.116754
0.000263	0.116566
0.000264	0.116396
0.000265	0.116225
0.000266	0.116066
0.000267	0.115908
0.000268	0.115749
0.000269	0.115596
0.00027	0.115467
0.000271	0.115338
0.000272	0.115161
0.000273	0.114967
0.000274	0.114767
0.000275	0.114621
0.000276	0.114485
0.000277	0.114286
0.000278	0.114097
0.000279	0.113968
0.00028	0.113845
0.000281	0.113721
0.000282	0.113651
0.000283	0.113569
0.000284	0.11341
0.000285	0.113245
0.000286	0.113092
0.000287	0.112934
0.000288	0.112775
0.000289	0.11261
0.00029	0.112452
0.000291	0.112317
0.000292	0.112205
0.000293	0.112052
0.000294	0.111905
0.000295	0.111788
0.000296	0.111647
0.000297	0.111494
0.000298	0.111347
0.000299	0.1112
0.0003	0.111053
0.000301	0.110918
0.000302	0.110818
0.000303	0.1107
0.000304	0.110577
0.000305	0.110453
0.000306	0.110318
0.000307	0.110207
0.000308	0.110095
0.000309	0.109989
0.00031	0.109889
0.000311	0.10976
0.000312	0.109607
0.000313	0.109478
0.000314	0.109349
0.000315	0.109196
0.000316	0.109037
0.000317	0.108896
0.000318	0.10879
0.000319	0.108708
0.00032	0.108579
0.000321	0.108443
0.000322	0.108314
0.000323	0.108179
0.000324	0.108079
0.000325	0.107991
0.000326	0.107891
0.000327	0.107744
0.000328	0.107585
0.000329	0.10748
0.00033	0.107397
0.000331	0.107309
0.000332	0.107233
0.000333	0.107174
0.000334	0.107086
0.000335	0.106927
0.000336	0.106792
0.000337	0.106739
0.000338	0.106674
0.000339	0.106569
0.00034	0.10648
0.000341	0.106386
0.000342	0.106275
0.000343	0.106163
0.000344	0.106034
0.000345	0.105904
0.000346	0.105804
0.000347	0.105734
0.000348	0.105611
0.000349	0.105458
0.00035	0.105375
0.000351	0.105281
0.000352	0.10517
0.000353	0.105082
0.000354	0.104946
0.000355	0.104788
0.000356	0.104647
0.000357	0.1045
0.000358	0.104376
0.000359	0.104294
0.00036	0.104218
0.000361	0.104094
0.000362	0.103959
0.000363	0.103877
0.000364	0.103794
0.000365	0.103677
0.000366	0.103548
0.000367	0.103401
0.000368	0.103277
0.000369	0.103177
0.00037	0.10306
0.000371	0.10296
0.000372	0.102872
0.000373	0.102766
0.000374	0.102631
0.000375	0.102531
0.000376	0.102449
0.000377	0.10236
0.000378	0.102319
0.000379	0.102249
0.00038	0.102137
0.000381	0.102049
0.000382	0.101984
0.000383	0.101867
0.000384	0.101737
0.000385	0.101637
0.000386	0.101538
0.000387	0.10142
0.000388	0.10132
0.000389	0.101244
0.00039	0.10115
0.000391	0.101061
0.000392	0.100979
0.000393	0.100873
0.000394	0.10075
0.000395	0.10065
0.000396	0.100562
0.000397	0.100462
0.000398	0.100362
0.000399	0.100292
0.0004	0.100186
0.000401	0.100086
0.000402	0.100015
0.000403	0.0999389
0.000404	0.0998742
0.000405	0.0998096
0.000406	0.0997626
0.000407	0.099692
0.000408	0.0996039
0.000409	0.0995275
0.00041	0.0994628
0.000411	0.0993864
0.000412	0.0992924
0.000413	0.099216
0.000414	0.0991278
0.000415	0.0990279
0.000416	0.0988986
0.000417	0.0987046
0.000418	0.0985401
0.000419	0.0984401
0.00042	0.0983226
0.000421	0.0981933
0.000422	0.0980993
0.000423	0.0980287
0.000424	0.0979523
0.000425	0.0978583
0.000426	0.0977466
0.000427	0.0976526
0.000428	0.0975585
0.000429	0.0974586
0.00043	0.0973528
0.000431	0.0972588
0.000432	0.0971883
0.000433	0.0971001
0.000434	0.0969943
0.000435	0.0968768
0.000436	0.0967416
0.000437	0.0966182
0.000438	0.0964947
0.000439	0.0963889
0.00044	0.0963067
0.000441	0.0962009
0.000442	0.0960951
0.000443	0.096001
0.000444	0.0959305
0.000445	0.0958423
0.000446	0.0957601
0.000447	0.0957072
0.000448	0.0956366
0.000449	0.0955485
0.00045	0.0954544
0.000451	0.0953722
0.000452	0.0952899
0.000453	0.0952076
0.000454	0.0951547
0.000455	0.0951136
0.000456	0.0950724
0.000457	0.0950313
0.000458	0.0949666
0.000459	0.0948726
0.00046	0.0947668
0.000461	0.0946904
0.000462	0.0946492
0.000463	0.0945434
0.000464	0.0944377
0.000465	0.0943848
0.000466	0.0943201
0.000467	0.0942319
0.000468	0.094132
0.000469	0.0940497
0.00047	0.0939792
0.000471	0.0938852
0.000472	0.0937911
0.000473	0.0937147
0.000474	0.0936383
0.000475	0.0935796
0.000476	0.0935149
0.000477	0.0934503
0.000478	0.0933856
0.000479	0.0932916
0.00048	0.0931975
0.000481	0.093127
0.000482	0.0930506
0.000483	0.0929801
0.000484	0.0929213
0.000485	0.0928508
0.000486	0.0927979
0.000487	0.0927685
0.000488	0.0927097
0.000489	0.0926509
0.00049	0.0925628
0.000491	0.092457
0.000492	0.0923864
0.000493	0.0923159
0.000494	0.0922454
0.000495	0.0921807
0.000496	0.0921043
0.000497	0.0920397
0.000498	0.0919809
0.000499	0.0918927
0.0005	0.0918163
0.000500999	0.0917576
0.000501999	0.0916518
0.000502999	0.0915166
0.000503999	0.0913932
0.000504999	0.0912815
0.000505999	0.0911875
0.000506999	0.0911169
0.000507999	0.091064
0.000508999	0.0909994
0.000509999	0.0909465
0.000510999	0.0908995
0.000511999	0.0908348
0.000512999	0.0907467
0.000513999	0.0906526
0.000514999	0.090588
0.000515999	0.0905468
0.000516999	0.0904998
0.000517999	0.0904645
0.000518999	0.0904352
0.000519999	0.0903764
0.000520999	0.0903059
0.000521999	0.0902295
0.000522999	0.0901472
0.000523999	0.0900708
0.000524999	0.0899826
0.000525999	0.0899121
0.000526999	0.0898533
0.000527999	0.0897886
0.000528999	0.0897475
0.000529999	0.0896829
0.000530999	0.0895947
0.000531999	0.0895418
0.000532999	0.0895065
0.000533999	0.0894654
0.000534999	0.0894243
0.000535999	0.089389
0.000536999	0.0893478
0.000537999	0.0893126
0.000538999	0.0892656
0.000539999	0.0892127
0.000540999	0.0891715
0.000541999	0.089101
0.000542999	0.0890422
0.000543999	0.0889834
0.000544999	0.0889129
0.000545999	0.0888424
0.000546999	0.088766
0.000547999	0.0887072
0.000548999	0.0886543
0.000549999	0.0886014
0.000550999	0.0885544
0.000551999	0.0885191
0.000552999	0.0884604
0.000553999	0.088384
0.000554999	0.0883369
0.000555999	0.0882899
0.000556999	0.088237
0.000557999	0.0881724
0.000558999	0.0880607
0.000559999	0.0879432
0.000560999	0.0878609
0.000561999	0.0878021
0.000562999	0.0877727
0.000563999	0.0877374
0.000564999	0.087661
0.000565999	0.0875611
0.000566999	0.0874906
0.000567999	0.0874612
0.000568999	0.0874201
0.000569999	0.0873319
0.000570999	0.0872437
0.000571999	0.0871967
0.000573999	0.0871497
0.000574999	0.0870968
0.000575999	0.0870439
0.000576999	0.0869793
0.000577999	0.0869205
0.000578999	0.0868676
0.000579999	0.0867971
0.000580999	0.0867265
0.000581999	0.0866678
0.000582999	0.0866031
0.000583999	0.0865502
0.000584999	0.0865032
0.000585999	0.0864562
0.000586999	0.0864327
0.000587999	0.0863798
0.000588999	0.0863034
0.000589999	0.0862328
0.000590999	0.0861799
0.000591999	0.0861447
0.000592999	0.08608
0.000593999	0.0860213
0.000594999	0.0859684
0.000595999	0.0859213
0.000597999	0.0858626
0.000598999	0.0857744
0.000599999	0.0857098
0.000600999	0.0856569
0.000601999	0.0856098
0.000602999	0.0855393
0.000603999	0.0854747
0.000604999	0.0854453
0.000605999	0.0853983
0.000606999	0.0853512
0.000607999	0.0853101
0.000608999	0.0852748
0.000609999	0.0852337
0.000610999	0.085169
0.000611999	0.0851103
0.000612999	0.0850632
0.000613999	0.085028
0.000614999	0.0849927
0.000615999	0.0849516
0.000616999	0.0849104
0.000617999	0.0848752
0.000618999	0.084834
0.000619999	0.0847694
0.000620999	0.0847047
0.000621999	0.0846577
0.000622999	0.0846224
0.000623999	0.0845872
0.000624999	0.0845519
0.000625999	0.0845284
0.000626999	0.0845108
0.000627999	0.0844637
0.000628999	0.0844226
0.000629999	0.0843991
0.000630999	0.0843521
0.000631999	0.0842992
0.000632999	0.0842287
0.000633999	0.084164
0.000634999	0.0841287
0.000635999	0.0840876
0.000636999	0.0840523
0.000637999	0.0840288
0.000638999	0.0839877
0.000639999	0.0839348
0.000640999	0.0838936
0.000641999	0.0838407
0.000642999	0.0837702
0.000643999	0.0837114
0.000644999	0.0836527
0.000645999	0.0835998
0.000646999	0.0835763
0.000647999	0.083541
0.000648999	0.083494
0.000649999	0.083447
0.000650999	0.0833882
0.000651999	0.0833294
0.000652999	0.0832883
0.000653999	0.0832295
0.000654999	0.0831413
0.000655999	0.0830591
0.000656999	0.0829944
0.000657999	0.0829533
0.000658999	0.0829062
0.000659999	0.0828475
0.000660999	0.0827711
0.000661999	0.0826829
0.000662999	0.0826124
0.000663999	0.0825654
0.000664999	0.0825066
0.000665999	0.0824596
0.000666999	0.0824478
0.000667999	0.0824243
0.000668999	0.0823655
0.000669999	0.0823068
0.000670999	0.0822656
0.000671999	0.0822303
0.000672999	0.0821774
0.000673999	0.0821128
0.000674999	0.0820834
0.000675999	0.0820364
0.000676999	0.0819717
0.000677999	0.0819365
0.000678999	0.0818953
0.000679999	0.0818424
0.000680999	0.0817837
0.000681999	0.0817249
0.000682999	0.081672
0.000683999	0.0816309
0.000684999	0.081578
0.000685999	0.0815074
0.000686999	0.0814545
0.000687999	0.0814075
0.000688999	0.0813429
0.000689999	0.0812958
0.000690999	0.0812723
0.000691999	0.0812136
0.000692999	0.0811372
0.000693999	0.0810784
0.000694999	0.0810372
0.000695999	0.081002
0.000696999	0.0809785
0.000697999	0.0809491
0.000698999	0.0809138
0.000699999	0.0808785
0.000700999	0.0808315
0.000701999	0.0807904
0.000702999	0.0807551
0.000703999	0.0807316
0.000704999	0.0807081
0.000705999	0.0806611
0.000706999	0.0806141
0.000707999	0.0805729
0.000708999	0.08052
0.000709999	0.080473
0.000710999	0.0804495
0.000711999	0.0803966
0.000712999	0.0803378
0.000713999	0.0803084
0.000714999	0.0802673
0.000715999	0.0801968
0.000716999	0.0801204
0.000717999	0.0800616
0.000718999	0.0800087
0.000719999	0.0799617
0.000720999	0.0799147
0.000721999	0.0798676
0.000722999	0.0798147
0.000723999	0.0797325
0.000724999	0.0796619
0.000725999	0.0796032
0.000726999	0.0795503
0.000727999	0.0795209
0.000728999	0.0794739
0.000729999	0.0794327
0.000730999	0.0793975
0.000731999	0.0793504
0.000732999	0.0793152
0.000733999	0.0792858
0.000734999	0.0792564
0.000735999	0.0792211
0.000736999	0.0791682
0.000737999	0.0791095
0.000738999	0.0790624
0.000739999	0.0790037
0.000740999	0.0789214
0.000741999	0.0788685
0.000742999	0.0788391
0.000743999	0.0788038
0.000744999	0.0787686
0.000745999	0.0787157
0.000746999	0.078651
0.000747999	0.0786099
0.000748999	0.078557
0.000749999	0.0784982
0.000750999	0.0784688
0.000751999	0.0784394
0.000752999	0.0783983
0.000753999	0.0783454
0.000754999	0.078269
0.000755999	0.0781985
0.000756999	0.0781573
0.000757999	0.0781338
0.000758999	0.0781044
0.000759999	0.0780692
0.000760999	0.0780398
0.000761999	0.0780045
0.000762999	0.0779751
0.000763999	0.077934
0.000764999	0.0778928
0.000765999	0.0778693
0.000766999	0.0778458
0.000767999	0.0778106
0.000768999	0.0777753
0.000769999	0.0777283
0.000770999	0.0776871
0.000771999	0.0776519
0.000772999	0.077599
0.000773999	0.0775578
0.000774999	0.0775284
0.000775999	0.0774932
0.000776999	0.077452
0.000777999	0.0773933
0.000778999	0.0773462
0.000779999	0.0773286
0.000780999	0.0772992
0.000783999	0.0772581
0.000784999	0.0772169
0.000785999	0.0771758
0.000786999	0.0771405
0.000787999	0.0770994
0.000788999	0.0770465
0.000789999	0.0769936
0.000791999	0.0769525
0.000792999	0.0769113
0.000793999	0.0768467
0.000794999	0.0767879
0.000795999	0.076735
0.000796999	0.076688
0.000797999	0.076641
0.000798999	0.0765881
0.000799999	0.076541
0.000800999	0.0765117
0.000801999	0.0764705
0.000802999	0.0764059
0.000803999	0.0763588
0.000804999	0.0763295
0.000805999	0.0762824
0.000806999	0.0762413
0.000807999	0.0761943
0.000808999	0.0761355
0.000809999	0.0760826
0.000810999	0.0760356
0.000811999	0.0759886
0.000812999	0.0759063
0.000813999	0.0758181
0.000815999	0.0757535
0.000816999	0.0756947
0.000817999	0.0756301
0.000818999	0.0755889
0.000819999	0.0755478
0.000820999	0.0755008
0.000821999	0.0754596
0.000822999	0.0754008
0.000823999	0.0753597
0.000824999	0.0753421
0.000825999	0.0753244
0.000826999	0.0753068
0.000827999	0.0752774
0.000828999	0.0752304
0.000829999	0.0751951
0.000830999	0.0751657
0.000831999	0.0751246
0.000832999	0.0750835
0.000834999	0.0750423
0.000835999	0.0750129
0.000836999	0.0749894
0.000837999	0.0749718
0.000838999	0.0749483
0.000839999	0.0749071
0.000840999	0.0748778
0.000841999	0.0748601
0.000842999	0.0748366
0.000843999	0.074819
0.000844999	0.0747955
0.000845999	0.0747543
0.000846999	0.0747249
0.000847999	0.0746779
0.000848999	0.0746309
0.000849999	0.0745898
0.000850999	0.0745369
0.000852999	0.0744957
0.000853999	0.0744605
0.000854999	0.0744369
0.000855999	0.0744134
0.000856999	0.0743958
0.000857999	0.0743841
0.000858999	0.0743723
0.000859999	0.0743605
0.000860999	0.0743429
0.000861999	0.0743076
0.000862999	0.0742606
0.000863999	0.0742312
0.000864999	0.0742077
0.000865999	0.0741607
0.000866999	0.0741196
0.000867999	0.0740843
0.000868999	0.074049
0.000869999	0.074002
0.000870999	0.0739491
0.000871999	0.0739197
0.000872999	0.0738727
0.000873999	0.0738139
0.000874999	0.0737728
0.000875999	0.0737199
0.000876999	0.073667
0.000877999	0.0736317
0.000878999	0.0736024
0.000879999	0.073573
0.000880999	0.0735436
0.000881999	0.0735201
0.000882999	0.0734907
0.000883999	0.0734554
0.000884999	0.0734084
0.000885999	0.0733731
0.000886999	0.0733496
0.000887999	0.0733202
0.000888999	0.0732732
0.000889999	0.0732262
0.000890999	0.0732086
0.000891999	0.0731851
0.000892999	0.0731498
0.000893999	0.0731263
0.000894999	0.0731145
0.000895999	0.0730969
0.000896999	0.0730499
0.000897999	0.0730087
0.000898999	0.0729852
0.000899999	0.0729617
0.000900999	0.0729382
0.000902999	0.072903
0.000903999	0.0728794
0.000905999	0.0728442
0.000906999	0.0728089
0.000907999	0.0727913
0.000908999	0.0727678
0.000909999	0.0727443
0.000910999	0.0727149
0.000911999	0.0726737
0.000912999	0.0726385
0.000913999	0.0726032
0.000914999	0.0725679
0.000915999	0.0725268
0.000916999	0.0724857
0.000917999	0.072468
0.000918999	0.0724504
0.000919999	0.0724328
0.000920999	0.072421
0.000921999	0.0723975
0.000922999	0.0723622
0.000923999	0.0723387
0.000924999	0.072327
0.000925999	0.0722976
0.000926999	0.0722623
0.000927999	0.0722094
0.000928999	0.0721624
0.000929999	0.0721389
0.000930999	0.0721095
0.000931999	0.0720919
0.000932999	0.0720742
0.000933999	0.072039
0.000935999	0.0720037
0.000936999	0.0719861
0.000937999	0.0719743
0.000938999	0.0719567
0.000939999	0.0719391
0.000941999	0.0719097
0.000942999	0.0718744
0.000944999	0.0718509
0.000946999	0.0718274
0.000947999	0.071798
0.000948999	0.0717686
0.000949999	0.071751
0.000950999	0.0717275
0.000951999	0.071704
0.000952999	0.0716746
0.000953999	0.0716393
0.000954999	0.0716158
0.000955999	0.0715923
0.000956999	0.0715747
0.000957999	0.0715335
0.000959999	0.0714865
0.000960999	0.071463
0.000961999	0.0714336
0.000962999	0.0713983
0.000963999	0.0713572
0.000964999	0.0713102
0.000965999	0.0712808
0.000966999	0.071269
0.000967999	0.0712455
0.000969999	0.0712103
0.000970999	0.0711868
0.000971999	0.0711632
0.000972999	0.0711162
0.000973999	0.071081
0.000974999	0.0710575
0.000975999	0.0710222
0.000976999	0.0709928
0.000978999	0.0709693
0.000979999	0.0709399
0.000980999	0.0708988
0.000981999	0.0708694
0.000982999	0.0708517
0.000984999	0.0708341
0.000986999	0.0708165
0.000987999	0.070793
0.000988999	0.0707753
0.000989999	0.0707401
0.000991999	0.0706989
0.000992999	0.0706754
0.000993999	0.0706519
0.000994999	0.0706225
0.000995999	0.0705814
0.000996999	0.0705167
0.000997999	0.0704638
0.000998999	0.0704403
0.000999999	0.0704109
0.001002	0.0703816
0.001004	0.0703639
0.001006	0.0703287
0.001007	0.0702758
0.001008	0.0702405
0.001009	0.070217
0.00101	0.0701935
0.001011	0.07017
0.001012	0.0701347
0.001013	0.0700994
0.001014	0.0700583
0.001015	0.0700172
0.001016	0.0699937
0.001017	0.069976
0.001018	0.0699525
0.001019	0.0699172
0.00102	0.069882
0.001021	0.0698408
0.001022	0.0698056
0.001024	0.0697879
0.001025	0.0697644
0.001026	0.0697292
0.001027	0.0697057
0.001028	0.0696939
0.00103	0.0696763
0.001031	0.0696469
0.001032	0.0696175
0.001033	0.0695881
0.001034	0.0695646
0.001035	0.0695411
0.001037	0.0694941
0.001038	0.0694529
0.00104	0.0694177
0.001041	0.0693824
0.001042	0.0693648
0.001043	0.069353
0.001044	0.0693295
0.001046	0.0693001
0.001047	0.0692766
0.001048	0.0692531
0.001049	0.0692237
0.00105	0.0691885
0.001051	0.0691591
0.001052	0.0691356
0.001053	0.0691062
0.001055	0.0690709
0.001057	0.0690356
0.001058	0.0690063
0.001059	0.068971
0.001061	0.0689298
0.001062	0.0688887
0.001063	0.0688534
0.001064	0.0688182
0.001065	0.0687829
0.001068	0.0687594
0.001069	0.0687359
0.001072	0.0686948
0.001073	0.0686301
0.001074	0.0685831
0.001075	0.0685537
0.001076	0.0684949
0.001077	0.068442
0.00108	0.0684244
0.001081	0.068395
0.001082	0.0683597
0.001083	0.0683362
0.001084	0.0683127
0.001085	0.0682951
0.001086	0.0682657
0.001088	0.0682363
0.001091	0.0682187
0.001092	0.0682011
0.001093	0.0681893
0.001094	0.0681717
0.001095	0.068154
0.001096	0.0681305
0.001097	0.0680894
0.001098	0.06806
0.001099	0.0680424
0.0011	0.068013
0.001101	0.0679836
0.001102	0.0679601
0.001103	0.0679189
0.001104	0.0678837
0.001105	0.0678602
0.001106	0.0678308
0.001107	0.0678073
0.001109	0.0677779
0.00111	0.0677485
0.001111	0.0677015
0.001112	0.0676545
0.001113	0.0676309
0.001114	0.0676074
0.001115	0.0675898
0.001116	0.0675722
0.001117	0.0675252
0.001118	0.067484
0.00112	0.0674546
0.001121	0.0674252
0.001122	0.0674017
0.001124	0.0673665
0.001126	0.067343
0.001127	0.0673136
0.00113	0.0672783
0.001131	0.0672548
0.001132	0.0672254
0.001134	0.0672019
0.001135	0.0671901
0.001136	0.0671784
0.001137	0.0671549
0.001138	0.0671314
0.00114	0.0671137
0.001141	0.0670961
0.001142	0.0670667
0.001144	0.0670256
0.001145	0.0670021
0.001146	0.0669727
0.001147	0.0669315
0.001148	0.0669022
0.001149	0.0668845
0.00115	0.0668551
0.001152	0.0668199
0.001153	0.0668022
0.001155	0.0667905
0.001156	0.066767
0.001157	0.0667317
0.001158	0.0667023
0.001159	0.0666553
0.00116	0.0666142
0.001161	0.0666024
0.001162	0.0665907
0.001163	0.066573
0.001164	0.0665554
0.001165	0.0665436
0.001166	0.0665201
0.001168	0.066479
0.001169	0.0664437
0.00117	0.0664261
0.001171	0.0664085
0.001172	0.0663732
0.001175	0.066332
0.001176	0.0663085
0.001177	0.0662968
0.001178	0.0662733
0.001179	0.0662498
0.00118	0.0662321
0.001181	0.0662086
0.001182	0.0661792
0.001183	0.0661557
0.001184	0.0661322
0.001186	0.0660793
0.001187	0.0660323
0.001188	0.0660029
0.001189	0.0659677
0.00119	0.0659265
0.001191	0.0658912
0.001192	0.0658736
0.001193	0.0658619
0.001194	0.0658325
0.001195	0.0657972
0.001197	0.0657796
0.001198	0.0657619
0.001199	0.0657384
0.0012	0.0657208
0.001201	0.0657032
0.001202	0.0656797
0.001203	0.0656562
0.001204	0.0656326
0.001205	0.065615
0.001206	0.0656033
0.001207	0.0655856
0.001208	0.0655621
0.00121	0.0655327
0.001211	0.0655033
0.001213	0.0654857
0.001214	0.0654563
0.001216	0.0654093
0.001217	0.065374
0.001218	0.0653505
0.001219	0.0653153
0.00122	0.06528
0.001221	0.0652624
0.001222	0.0652506
0.001223	0.0652036
0.001224	0.0651566
0.001225	0.0651448
0.001226	0.0651331
0.001227	0.0651154
0.001228	0.0650978
0.001229	0.065086
0.001231	0.0650625
0.001232	0.0650331
0.001233	0.0650038
0.001234	0.0649803
0.001235	0.0649567
0.001236	0.0649274
0.001237	0.0649097
0.001239	0.0648862
0.001242	0.0648568
0.001243	0.0648392
0.001244	0.0648098
0.001245	0.0647687
0.001246	0.0647452
0.001248	0.0647216
0.001249	0.0646981
0.001251	0.0646864
0.001252	0.0646688
0.001253	0.0646452
0.001254	0.0646276
0.001256	0.06461
0.001257	0.0645923
0.001258	0.0645688
0.001261	0.0645336
0.001262	0.0645042
0.001263	0.0644689
0.001266	0.0644337
0.001267	0.0644043
0.001268	0.064369
0.001269	0.0643455
0.00127	0.0643337
0.001272	0.064322
0.001274	0.0643102
0.001275	0.0642985
0.001276	0.0642808
0.001277	0.0642573
0.001278	0.0642397
0.00128	0.0642221
0.001281	0.0641927
0.001282	0.0641515
0.001283	0.0641104
0.001284	0.0640869
0.001285	0.0640693
0.001286	0.0640457
0.001288	0.0640281
0.001289	0.0639929
0.001292	0.0639576
0.001294	0.06394
0.001295	0.0639106
0.001297	0.0638871
0.001299	0.0638636
0.001301	0.0638283
0.001302	0.0638048
0.001303	0.063793
0.001304	0.0637813
0.001305	0.0637695
0.001307	0.0637519
0.001308	0.0637342
0.001309	0.0637166
0.00131	0.0636931
0.001311	0.0636637
0.001312	0.0636226
0.001313	0.0635932
0.001314	0.0635814
0.001317	0.0635521
0.00132	0.0635227
0.001322	0.0635109
0.001323	0.0634933
0.001324	0.0634756
0.001326	0.0634521
0.001327	0.0634286
0.001328	0.0634169
0.001329	0.0633816
0.001331	0.0633346
0.001333	0.0633052
0.001334	0.0632817
0.001335	0.0632582
0.001338	0.0632405
0.00134	0.0632229
0.001341	0.0632053
0.001342	0.0631935
0.001345	0.0631759
0.001346	0.0631583
0.001347	0.0631406
0.001348	0.0631054
0.001349	0.0630701
0.001353	0.0630348
0.001354	0.0629996
0.001355	0.0629819
0.001357	0.0629702
0.001358	0.0629526
0.001359	0.0629232
0.00136	0.0628997
0.001361	0.0628879
0.001362	0.0628762
0.001364	0.0628526
0.001365	0.0628115
0.001366	0.0627821
0.001367	0.0627645
0.001369	0.0627468
0.001371	0.0627351
0.001372	0.0627057
0.001374	0.0626646
0.001376	0.0626293
0.001377	0.0626058
0.001378	0.0625882
0.001379	0.0625705
0.00138	0.0625588
0.001381	0.0625411
0.001383	0.0625118
0.001385	0.0624882
0.001386	0.0624706
0.001387	0.0624412
0.001388	0.062406
0.00139	0.0623766
0.001392	0.0623531
0.001393	0.0623354
0.001396	0.0623237
0.001397	0.0623002
0.001398	0.0622767
0.0014	0.0622649
0.001403	0.0622473
0.001404	0.0622296
0.001406	0.062212
0.001407	0.0621944
0.001408	0.0621826
0.00141	0.0621709
0.001411	0.0621591
0.001412	0.0621356
0.001413	0.0621121
0.001414	0.0621003
0.001415	0.0620886
0.001416	0.0620768
0.001417	0.0620651
0.001418	0.0620416
0.001419	0.0620063
0.00142	0.0619828
0.001423	0.061971
0.001424	0.0619593
0.001425	0.0619475
0.001427	0.0619299
0.001428	0.0618946
0.00143	0.0618594
0.001433	0.06183
0.001434	0.0617947
0.001436	0.0617653
0.001437	0.0617477
0.001439	0.0617242
0.00144	0.0616948
0.001442	0.0616713
0.001443	0.0616537
0.001444	0.061636
0.001446	0.0616184
0.001447	0.0616066
0.001448	0.0615949
0.00145	0.0615831
0.001451	0.0615596
0.001452	0.0615361
0.001453	0.0615185
0.001454	0.0614891
0.001455	0.0614597
0.001456	0.0614421
0.001458	0.0614303
0.001459	0.0614186
0.001461	0.0614068
0.001462	0.0613833
0.001464	0.0613598
0.001466	0.0613304
0.001467	0.061301
0.001468	0.0612834
0.001469	0.0612658
0.00147	0.0612481
0.001471	0.0612305
0.001472	0.0612187
0.001473	0.0612011
0.001474	0.0611835
0.001475	0.0611717
0.001476	0.06116
0.001478	0.0611482
0.001479	0.0611364
0.00148	0.0611188
0.001481	0.0611012
0.001483	0.0610836
0.001484	0.06106
0.001486	0.0610424
0.001487	0.0610307
0.001488	0.061013
0.001489	0.0609895
0.00149	0.060966
0.001491	0.0609425
0.001492	0.0609249
0.001496	0.0609072
0.001497	0.0608896
0.001498	0.0608778
0.001499	0.0608485
0.0015	0.0608191
0.001502	0.0608014
0.001503	0.0607838
0.001504	0.0607721
0.001505	0.0607544
0.001506	0.0607309
0.001507	0.0607074
0.001508	0.0606898
0.001509	0.0606721
0.001512	0.0606545
0.001514	0.060631
0.001515	0.0606016
0.001516	0.0605781
0.001518	0.0605428
0.00152	0.0605134
0.001521	0.0604899
0.001522	0.0604664
0.001523	0.0604429
0.001524	0.0604194
0.001525	0.0603959
0.001526	0.0603724
0.001528	0.0603548
0.001529	0.0603371
0.00153	0.0603136
0.001531	0.0602901
0.001533	0.0602784
0.001534	0.0602548
0.001535	0.0602313
0.001536	0.0602078
0.001537	0.0601784
0.001538	0.0601549
0.001539	0.0601373
0.001543	0.0601197
0.001545	0.060102
0.001546	0.0600903
0.001547	0.0600726
0.001548	0.060055
0.001549	0.0600374
0.00155	0.0600197
0.001551	0.0599962
0.001552	0.0599727
0.001553	0.059961
0.001554	0.0599492
0.001555	0.0599375
0.001557	0.0599257
0.00156	0.059914
0.001562	0.0598963
0.001563	0.0598787
0.001564	0.0598552
0.001566	0.0598317
0.001568	0.0598082
0.001569	0.0597788
0.00157	0.0597553
0.001571	0.0597376
0.001573	0.0597259
0.001574	0.0597082
0.001577	0.0596847
0.001578	0.0596671
0.001579	0.0596554
0.001581	0.0596377
0.001582	0.0596142
0.001584	0.0595907
0.001588	0.0595731
0.001589	0.0595554
0.00159	0.0595378
0.001591	0.0595143
0.001592	0.0594849
0.001593	0.0594673
0.001594	0.0594555
0.001595	0.0594438
0.001596	0.059432
0.001597	0.0594203
0.001599	0.0594026
0.001603	0.059385
0.001604	0.0593732
0.001606	0.0593615
0.001609	0.0593497
0.00161	0.059338
0.001611	0.0593262
0.001613	0.0593145
0.001617	0.0592968
0.001618	0.0592792
0.00162	0.0592557
0.001623	0.0592204
0.001624	0.0591969
0.001625	0.0591852
0.001626	0.0591675
0.001627	0.0591499
0.001628	0.0591264
0.001629	0.0591029
0.00163	0.0590794
0.001631	0.0590441
0.001632	0.0590206
0.001633	0.0590088
0.001635	0.0589971
0.001636	0.0589853
0.001637	0.0589736
0.001638	0.0589501
0.001639	0.0589148
0.001641	0.0588913
0.001642	0.0588795
0.001643	0.0588678
0.001644	0.058856
0.001645	0.0588384
0.001647	0.0588208
0.001648	0.058809
0.001649	0.0587855
0.001651	0.0587561
0.001652	0.0587326
0.001653	0.058715
0.001654	0.0587032
0.001655	0.0586856
0.001656	0.0586562
0.001658	0.0586327
0.00166	0.0586209
0.001663	0.0586092
0.001664	0.0585974
0.001665	0.0585857
0.001666	0.058568
0.001668	0.0585504
0.001669	0.0585386
0.001671	0.0585269
0.001672	0.0585151
0.001673	0.0584975
0.001674	0.0584799
0.001675	0.0584681
0.001677	0.0584446
0.00168	0.0584093
0.001682	0.05838
0.001683	0.0583623
0.001684	0.0583506
0.001686	0.0583271
0.001687	0.0583036
0.001688	0.0582918
0.001689	0.05828
0.001691	0.0582683
0.001694	0.0582565
0.001695	0.0582389
0.001696	0.0582154
0.001698	0.0581978
0.001699	0.058186
0.0017	0.0581684
0.001701	0.0581331
0.001702	0.0580978
0.001703	0.0580802
0.001704	0.0580685
0.001705	0.0580508
0.001706	0.0580332
0.001707	0.0580156
0.001708	0.0579979
0.001709	0.0579744
0.00171	0.057945
0.001711	0.0579274
0.001712	0.0579098
0.001713	0.0578863
0.001715	0.0578686
0.001716	0.0578569
0.001717	0.0578334
0.001718	0.057804
0.001719	0.0577805
0.001723	0.0577628
0.001725	0.0577511
0.001726	0.0577334
0.001727	0.0577158
0.001728	0.0577041
0.001729	0.0576923
0.001731	0.0576806
0.001733	0.0576629
0.001734	0.0576394
0.001735	0.0576159
0.001736	0.0575924
0.001737	0.0575689
0.001738	0.0575513
0.001739	0.0575395
0.001742	0.0575101
0.001743	0.0574748
0.001745	0.0574513
0.001748	0.0574278
0.001749	0.0574043
0.001751	0.0573867
0.001753	0.0573691
0.001756	0.0573397
0.001757	0.0573103
0.001758	0.0572926
0.001762	0.0572809
0.001765	0.0572515
0.001766	0.0572162
0.001767	0.0571869
0.001768	0.0571633
0.001769	0.0571281
0.00177	0.0570928
0.001772	0.0570811
0.001773	0.0570693
0.001774	0.0570517
0.001776	0.0570282
0.001778	0.0570047
0.001779	0.0569753
0.00178	0.0569341
0.001781	0.0568989
0.001782	0.0568754
0.001783	0.0568577
0.001785	0.056846
0.001786	0.0568342
0.001787	0.0568166
0.001789	0.0567989
0.00179	0.0567813
0.001792	0.0567637
0.001794	0.0567461
0.001795	0.0567225
0.001796	0.056699
0.001798	0.0566755
0.001799	0.056652
0.0018	0.0566344
0.001801	0.0566226
0.001802	0.0566109
0.001803	0.0565991
0.001804	0.0565815
0.001806	0.056558
0.001808	0.0565403
0.001809	0.0565227
0.001811	0.0564992
0.001812	0.0564816
0.001815	0.0564698
0.001818	0.0564581
0.00182	0.0564287
0.001823	0.0563934
0.001824	0.0563758
0.001827	0.0563581
0.001828	0.0563405
0.001829	0.0563288
0.001831	0.056317
0.001833	0.0562935
0.001834	0.05627
0.001837	0.0562582
0.001839	0.0562406
0.001842	0.0562053
0.001844	0.0561642
0.001846	0.0561289
0.001849	0.0561054
0.00185	0.0560937
0.001852	0.0560643
0.001853	0.0560349
0.001854	0.0560173
0.001857	0.0559937
0.001858	0.0559761
0.001859	0.0559644
0.001861	0.0559526
0.001862	0.055935
0.001863	0.0559173
0.001865	0.0559056
0.001867	0.0558938
0.001868	0.0558821
0.001869	0.0558703
0.001871	0.0558586
0.001873	0.0558409
0.001874	0.0558174
0.001875	0.0557939
0.001876	0.0557763
0.001878	0.0557645
0.001879	0.0557528
0.001881	0.055741
0.001886	0.0557293
0.001887	0.0557175
0.001889	0.055694
0.001891	0.0556587
0.001892	0.0556176
0.001893	0.0555823
0.001894	0.0555588
0.001895	0.0555412
0.001896	0.0555236
0.001897	0.0555059
0.001899	0.0554942
0.0019	0.0554824
0.001902	0.0554648
0.001903	0.0554472
0.001904	0.0554354
0.001905	0.0554236
0.001906	0.0554119
0.001907	0.0554001
0.001908	0.0553825
0.001909	0.0553649
0.00191	0.0553531
0.001911	0.0553355
0.001912	0.0553178
0.001913	0.0553061
0.001914	0.0552885
0.001917	0.0552708
0.001919	0.0552591
0.00192	0.0552414
0.001923	0.0552179
0.001924	0.0552003
0.001928	0.0551768
0.001931	0.0551474
0.001932	0.0551239
0.001933	0.0551063
0.001937	0.0550886
0.001938	0.0550651
0.001943	0.0550475
0.001948	0.0550299
0.001953	0.0550063
0.001956	0.0549711
0.00196	0.0549358
0.001961	0.0549123
0.001962	0.0548947
0.001963	0.0548712
0.001964	0.0548477
0.001965	0.0548359
0.001967	0.0548241
0.001968	0.0548065
0.001969	0.0547889
0.00197	0.0547771
0.001974	0.0547654
0.001975	0.0547536
0.001976	0.0547419
0.001977	0.0547301
0.001978	0.0547184
0.001979	0.0547066
0.001983	0.0546772
0.001985	0.0546478
0.001987	0.0546361
0.001989	0.0546184
0.00199	0.0546008
0.001991	0.0545832
0.001992	0.0545597
0.001993	0.054542
0.001994	0.0545303
0.001995	0.0545185
0.001997	0.0545068
0.001999	0.054495
0.002001	0.0544833
0.002002	0.0544656
0.002003	0.054448
0.002007	0.0544304
0.002011	0.0544069
0.002012	0.0543892
0.002014	0.0543775
0.002016	0.0543657
0.002017	0.054354
0.002018	0.0543246
0.002019	0.0542893
0.002021	0.0542717
0.002023	0.054254
0.002024	0.0542364
0.002025	0.0542247
0.002027	0.0542129
0.002029	0.0542011
0.00203	0.0541835
0.002032	0.0541659
0.002034	0.0541541
0.002037	0.0541365
0.00204	0.0541189
0.002043	0.0541071
0.002045	0.0540954
0.002047	0.0540836
0.002048	0.0540718
0.002049	0.0540601
0.00205	0.0540483
0.002051	0.0540366
0.002052	0.0540131
0.002055	0.0539719
0.002056	0.0539425
0.002057	0.0539308
0.002061	0.053919
0.002064	0.0539014
0.002065	0.0538838
0.002067	0.053872
0.002068	0.0538603
0.002069	0.0538426
0.002072	0.0538191
0.002075	0.0538015
0.002077	0.0537721
0.002078	0.0537427
0.002079	0.0537251
0.002081	0.0537074
0.002082	0.0536957
0.002083	0.0536781
0.002085	0.0536604
0.002086	0.0536428
0.002087	0.0536252
0.002088	0.0536134
0.002089	0.0535958
0.002091	0.0535781
0.002093	0.0535664
0.002095	0.0535488
0.002097	0.0535311
0.002098	0.0535194
0.0021	0.0535076
0.002102	0.0534959
0.002103	0.0534782
0.002105	0.0534606
0.002108	0.053443
0.002109	0.0534253
0.00211	0.0534136
0.002113	0.0534018
0.002114	0.0533901
0.002115	0.0533666
0.002117	0.0533431
0.002118	0.0533313
0.002123	0.0533195
0.002128	0.0533019
0.00213	0.0532843
0.002131	0.0532725
0.002132	0.0532608
0.002134	0.053249
0.002135	0.0532373
0.002137	0.0532255
0.002138	0.0532137
0.002139	0.053202
0.00214	0.0531844
0.002143	0.0531667
0.002145	0.0531432
0.002148	0.0531197
0.00215	0.053108
0.002152	0.0530903
0.002155	0.0530727
0.002156	0.0530609
0.002158	0.0530315
0.002161	0.0530022
0.002163	0.0529787
0.002164	0.0529493
0.002165	0.0529316
0.002166	0.0529199
0.002168	0.0529081
0.002171	0.0528964
0.002172	0.0528787
0.002174	0.0528552
0.002175	0.0528376
0.002177	0.0528258
0.002178	0.0528082
0.002179	0.0527847
0.00218	0.0527671
0.002184	0.0527553
0.002187	0.0527436
0.002192	0.0527142
0.002194	0.0526848
0.002197	0.052673
0.002198	0.0526554
0.002199	0.0526319
0.0022	0.0526143
0.002204	0.0526025
0.002205	0.0525907
0.002206	0.052579
0.002207	0.0525672
0.002209	0.0525555
0.00221	0.0525437
0.002212	0.0525261
0.002214	0.0525026
0.002215	0.0524791
0.002216	0.0524556
0.002219	0.0524379
0.00222	0.0524203
0.002221	0.0524027
0.002224	0.0523909
0.002226	0.0523792
0.002227	0.0523615
0.002228	0.052338
0.00223	0.0523028
0.002231	0.0522734
0.002234	0.0522616
0.002237	0.0522499
0.002239	0.0522381
0.002243	0.0522263
0.002245	0.0522146
0.002246	0.0522028
0.002247	0.0521911
0.002248	0.0521793
0.002249	0.0521617
0.00225	0.0521441
0.002251	0.0521264
0.002252	0.0521088
0.002257	0.052097
0.002259	0.0520853
0.00226	0.0520735
0.002261	0.0520618
0.002264	0.05205
0.002265	0.0520383
0.002266	0.0520265
0.002268	0.0520148
0.00227	0.052003
0.002271	0.0519795
0.002272	0.051956
0.002276	0.0519442
0.00228	0.0519325
0.002281	0.0519207
0.002282	0.051909
0.002284	0.0518972
0.002286	0.0518737
0.002287	0.0518443
0.002288	0.0518208
0.002291	0.0518032
0.002293	0.0517914
0.002294	0.0517738
0.002295	0.0517562
0.002298	0.0517444
0.002301	0.0517326
0.002304	0.051715
0.002305	0.0516974
0.002307	0.0516856
0.002308	0.0516739
0.002309	0.0516562
0.00231	0.0516327
0.002314	0.0516151
0.002316	0.0516033
0.002319	0.0515916
0.002322	0.0515798
0.002325	0.0515681
0.002329	0.0515563
0.00233	0.0515446
0.002332	0.0515328
0.002335	0.0515211
0.002336	0.0515093
0.002337	0.0514976
0.002338	0.0514858
0.002341	0.051474
0.002342	0.0514564
0.002345	0.0514388
0.002346	0.0514211
0.002347	0.0514035
0.002349	0.0513918
0.002352	0.0513741
0.002354	0.0513565
0.002357	0.0513447
0.002361	0.0513212
0.002362	0.0512977
0.002363	0.0512801
0.002364	0.0512625
0.002368	0.0512507
0.002369	0.0512331
0.002371	0.0512154
0.002373	0.0512037
0.002376	0.0511919
0.002377	0.0511802
0.002382	0.0511684
0.002384	0.0511567
0.002386	0.0511449
0.002388	0.0511214
0.002389	0.0510979
0.00239	0.0510861
0.002391	0.0510744
0.002392	0.0510626
0.002399	0.0510509
0.0024	0.0510391
0.002401	0.0510274
0.002402	0.0510156
0.002405	0.0510039
0.002406	0.0509803
0.002407	0.050951
0.002409	0.0509274
0.00241	0.0509098
0.002413	0.0508922
0.002414	0.0508687
0.002416	0.050851
0.002419	0.0508393
0.002424	0.0508275
0.002425	0.0508158
0.002426	0.0507981
0.002427	0.0507746
0.002428	0.050757
0.002429	0.0507453
0.00243	0.0507276
0.002437	0.0507041
0.002439	0.0506865
0.002443	0.0506747
0.002445	0.0506571
0.002446	0.0506395
0.002449	0.0506218
0.00245	0.0505924
0.002452	0.0505689
0.002453	0.0505513
0.002454	0.0505337
0.002455	0.0505219
0.002461	0.0505102
0.002462	0.0504984
0.002464	0.0504866
0.002465	0.0504749
0.002467	0.0504631
0.002468	0.0504514
0.002469	0.0504396
0.002471	0.0504279
0.002472	0.0504161
0.002475	0.0503985
0.002476	0.050375
0.002481	0.0503573
0.002485	0.0503456
0.002491	0.0503338
0.002496	0.0503221
0.0025	0.0503044
0.002503	0.0502868
0.002504	0.0502751
0.002506	0.0502633
0.002509	0.0502516
0.002511	0.0502398
0.002512	0.0502222
0.002513	0.0501987
0.002515	0.0501751
0.002519	0.0501516
0.00252	0.050134
0.002522	0.0501222
0.002524	0.0501105
0.002525	0.0500987
0.002529	0.050087
0.00253	0.0500752
0.002531	0.0500635
0.002533	0.0500517
0.002535	0.05004
0.002538	0.0500282
0.002541	0.0500165
0.002542	0.0500047
0.002543	0.0499929
0.00255	0.0499812
0.002552	0.0499694
0.002553	0.0499577
0.002556	0.0499401
0.002557	0.0499165
0.00256	0.0498989
0.002561	0.0498813
0.002563	0.0498578
0.002567	0.0498401
0.002568	0.0498225
0.00257	0.0497931
0.002571	0.0497579
0.002574	0.0497343
0.002578	0.0497167
0.002579	0.0496991
0.002587	0.0496814
0.00259	0.0496638
0.002591	0.0496462
0.002593	0.0496227
0.002597	0.049605
0.002601	0.0495933
0.002611	0.0495815
0.002612	0.0495698
0.002615	0.049558
0.002616	0.0495463
0.002619	0.0495345
[truncated: 3,957 more rows]
