# Supplementary material for: Environmental heterogeneity can tip the population genetics of range expansions
Source: eLife journal article supplement (doi:10.7554/elife.44359), 2019-04-12
Supplement: supp [file sfs rho=0.xlsx]

## Sheet: s=-0.15
0	0.994996
9.99999e-07	0.83177
2e-06	0.597429
3e-06	0.480968
4e-06	0.411182
5e-06	0.361528
5.99999e-06	0.324762
6.99999e-06	0.296148
7.99999e-06	0.27378
8.99999e-06	0.254697
9.99999e-06	0.238617
1.1e-05	0.224664
1.2e-05	0.212271
1.3e-05	0.201344
1.4e-05	0.191683
1.5e-05	0.183248
1.6e-05	0.175442
1.7e-05	0.168359
1.8e-05	0.162043
1.9e-05	0.156265
2e-05	0.150912
2.1e-05	0.145983
2.2e-05	0.141451
2.3e-05	0.137124
2.4e-05	0.132851
2.5e-05	0.128854
2.6e-05	0.125364
2.7e-05	0.121928
2.8e-05	0.118666
2.9e-05	0.115608
3e-05	0.112523
3.1e-05	0.109704
3.2e-05	0.107138
3.3e-05	0.104752
3.4e-05	0.102535
3.5e-05	0.100279
3.6e-05	0.0981016
3.7e-05	0.0960105
3.8e-05	0.0939431
3.9e-05	0.091911
4e-05	0.0900558
4.1e-05	0.0883775
4.2e-05	0.0866363
4.3e-05	0.0848715
4.4e-05	0.0832325
4.5e-05	0.0817506
4.6e-05	0.0803357
4.7e-05	0.0789207
4.8e-05	0.0775489
4.9e-05	0.0763344
5e-05	0.0751788
5.09999e-05	0.0739171
5.19999e-05	0.0726594
5.29999e-05	0.0714213
5.39999e-05	0.0702696
5.49999e-05	0.0692163
5.59999e-05	0.0681472
5.69999e-05	0.0670938
5.79999e-05	0.0660601
5.89999e-05	0.0650303
5.99999e-05	0.0640398
6.09999e-05	0.0630375
6.19999e-05	0.0620785
6.29999e-05	0.0612255
6.39999e-05	0.0604473
6.49999e-05	0.0596887
6.59999e-05	0.058934
6.69999e-05	0.0581362
6.79999e-05	0.0573107
6.89999e-05	0.0565404
6.99999e-05	0.0558447
7.09999e-05	0.0551057
7.19999e-05	0.0543157
7.29999e-05	0.0535728
7.39999e-05	0.052885
7.49999e-05	0.0522365
7.59999e-05	0.0515997
7.69999e-05	0.0509826
7.79999e-05	0.0503655
7.89999e-05	0.0497681
7.99999e-05	0.0491864
8.09999e-05	0.0486283
8.19999e-05	0.0479994
8.29999e-05	0.0474491
8.39999e-05	0.0469696
8.49999e-05	0.046435
8.59999e-05	0.0459201
8.69999e-05	0.0453856
8.79999e-05	0.0449414
8.89999e-05	0.0445209
8.99999e-05	0.044006
9.09999e-05	0.0435029
9.19999e-05	0.0430587
9.29999e-05	0.0426382
9.39999e-05	0.0421979
9.49999e-05	0.041742
9.59999e-05	0.0413293
9.69999e-05	0.040948
9.79999e-05	0.0405589
9.89999e-05	0.0401541
9.99999e-05	0.0397532
0.000101	0.0393719
0.000102	0.0389828
0.000103	0.0386172
0.000104	0.038291
0.000105	0.037953
0.000106	0.0376543
0.000107	0.0373831
0.000108	0.0370215
0.000109	0.0366441
0.00011	0.0362904
0.000111	0.0359484
0.000112	0.0356143
0.000113	0.035296
0.000114	0.0349972
0.000115	0.0346396
0.000116	0.034278
0.000117	0.0339399
0.000118	0.0336137
0.000119	0.0333071
0.00012	0.0329888
0.000121	0.0326743
0.000122	0.0323245
0.000123	0.0319943
0.000124	0.0317153
0.000125	0.0314362
0.000126	0.0311611
0.000127	0.0308938
0.000128	0.0306305
0.000129	0.0303199
0.00013	0.030033
0.000131	0.0298208
0.000132	0.0296125
0.000133	0.029357
0.000134	0.029074
0.000135	0.0287831
0.000136	0.0284962
0.000137	0.0282132
0.000138	0.0279341
0.000139	0.0276629
0.00014	0.0274271
0.000141	0.0272109
0.000142	0.0270105
0.000143	0.0268139
0.000144	0.0266174
0.000145	0.0264523
0.000146	0.0262676
0.000147	0.0261104
0.000148	0.0259649
0.000149	0.0257763
0.00015	0.025564
0.000151	0.0253636
0.000152	0.0251553
0.000153	0.0249155
0.000154	0.0247072
0.000155	0.0245224
0.000156	0.0243456
0.000157	0.0241569
0.000158	0.0239604
0.000159	0.0237639
0.00016	0.023587
0.000161	0.0234298
0.000162	0.023245
0.000163	0.0230564
0.000164	0.0228834
0.000165	0.0227105
0.000166	0.0225493
0.000167	0.0223882
0.000168	0.0222231
0.000169	0.0220934
0.00017	0.0219519
0.000171	0.021775
0.000172	0.0216099
0.000173	0.0214566
0.000174	0.021268
0.000175	0.0210872
0.000176	0.0209457
0.000177	0.0207727
0.000178	0.0205998
0.000179	0.0204504
0.00018	0.0203089
0.000181	0.0201871
0.000182	0.0200731
0.000183	0.0199316
0.000184	0.0197547
0.000185	0.0196093
0.000186	0.0194875
0.000187	0.0193381
0.000188	0.0191455
0.000189	0.0189844
0.00019	0.0188979
0.000191	0.0188429
0.000192	0.0187721
0.000193	0.0186621
0.000194	0.0185402
0.000195	0.0184223
0.000196	0.018328
0.000197	0.018214
0.000198	0.0180843
0.000199	0.0179821
0.0002	0.0178995
0.000201	0.0177934
0.000202	0.0176834
0.000203	0.017593
0.000204	0.0174986
0.000205	0.0173964
0.000206	0.0173021
0.000207	0.0172196
0.000208	0.0170977
0.000209	0.0169798
0.00021	0.0168894
0.000211	0.0167793
0.000212	0.0166536
0.000213	0.016516
0.000214	0.016402
0.000215	0.0163234
0.000216	0.0162212
0.000217	0.0161229
0.000218	0.0160325
0.000219	0.0159225
0.00022	0.0158085
0.000221	0.0157142
0.000222	0.0156395
0.000223	0.0155648
0.000224	0.0154862
0.000225	0.0153958
0.000226	0.0152857
0.000227	0.015156
0.000228	0.0150381
0.000229	0.0149517
0.00023	0.0148848
0.000231	0.0148337
0.000232	0.0147512
0.000233	0.014649
0.000234	0.0145783
0.000235	0.0145075
0.000236	0.0144171
0.000237	0.0143149
0.000238	0.0142127
0.000239	0.0141341
0.00024	0.014083
0.000241	0.0140201
0.000242	0.0139297
0.000243	0.0138275
0.000244	0.013745
0.000245	0.0136585
0.000246	0.0135799
0.000247	0.013517
0.000248	0.0134463
0.000249	0.0133637
0.00025	0.013293
0.000251	0.0132497
0.000252	0.0131908
0.000253	0.0130925
0.000254	0.0130178
0.000255	0.0129667
0.000256	0.0128999
0.000257	0.0128174
0.000258	0.0127073
0.000259	0.0125973
0.00026	0.0125147
0.000261	0.0124597
0.000262	0.0124047
0.000263	0.0123457
0.000264	0.0122828
0.000265	0.012216
0.000266	0.0121335
0.000267	0.0120588
0.000268	0.0119998
0.000269	0.0119134
0.00027	0.011819
0.000271	0.0117562
0.000272	0.0116893
0.000273	0.0116264
0.000274	0.0115675
0.000275	0.0114849
0.000276	0.0114142
0.000277	0.0113592
0.000278	0.0112845
0.000279	0.0112059
0.00028	0.011143
0.000281	0.0110801
0.000282	0.0110172
0.000283	0.0109779
0.000284	0.0109425
0.000285	0.0108914
0.000286	0.0108521
0.000287	0.0108089
0.000288	0.0107696
0.000289	0.0107342
0.00029	0.0106831
0.000291	0.0106438
0.000292	0.0106006
0.000293	0.0105377
0.000295	0.0104905
0.000296	0.010463
0.000297	0.0104198
0.000298	0.0103687
0.000299	0.0103097
0.0003	0.0102429
0.000301	0.0101761
0.000302	0.0101053
0.000303	0.0100346
0.000304	0.00997563
0.000305	0.00992453
0.000306	0.00986951
0.000307	0.00981841
0.000308	0.00977517
0.000309	0.00972408
0.00031	0.00966119
0.000311	0.00960616
0.000312	0.009559
0.000313	0.00951183
0.000314	0.00947253
0.000315	0.00943715
0.000316	0.00939392
0.000317	0.00935068
0.000318	0.00932317
0.000319	0.00928779
0.00032	0.00924063
0.000321	0.00921311
0.000322	0.00918167
0.000323	0.00915022
0.000324	0.00912271
0.000325	0.00907161
0.000326	0.00901659
0.000327	0.00898514
0.000328	0.0089537
0.000329	0.00892225
0.00033	0.00888295
0.000331	0.00882399
0.000332	0.00878469
0.000333	0.00875717
0.000334	0.00873359
0.000335	0.0087218
0.000336	0.00869429
0.000337	0.00866284
0.000338	0.00863533
0.000339	0.00859602
0.00034	0.00855672
0.000341	0.00852134
0.000342	0.00847811
0.000343	0.00843487
0.000344	0.0083995
0.000345	0.00836019
0.000346	0.00831303
0.000347	0.00826979
0.000348	0.00823049
0.000349	0.00819511
0.00035	0.00814794
0.000351	0.00810864
0.000352	0.00808113
0.000353	0.00804182
0.000354	0.00801824
0.000355	0.00799465
0.000356	0.00795535
0.000357	0.00793177
0.000358	0.00791211
0.000359	0.0078846
0.00036	0.00783743
0.000361	0.00777848
0.000362	0.00774703
0.000363	0.00772345
0.000364	0.00768807
0.000366	0.00764484
0.000367	0.00760553
0.000368	0.0075623
0.000369	0.00751906
0.00037	0.00748762
0.000371	0.00746011
0.000372	0.00744438
0.000373	0.00742866
0.000374	0.00740901
0.000375	0.00738936
0.000376	0.00735791
0.000377	0.00730682
0.000378	0.00724786
0.000379	0.00721248
0.00038	0.00719283
0.000381	0.00715353
0.000382	0.00711029
0.000383	0.00708671
0.000384	0.00706705
0.000385	0.00703561
0.000386	0.00700417
0.000387	0.00696486
0.000388	0.00692556
0.000389	0.00690197
0.00039	0.00687446
0.000391	0.00683515
0.000392	0.00679978
0.000393	0.00676441
0.000394	0.00672903
0.000395	0.00670938
0.000396	0.00668973
0.000397	0.006674
0.000398	0.00665828
0.000399	0.00661898
0.0004	0.00658753
0.000401	0.00656788
0.000402	0.0065443
0.000403	0.00652071
0.000404	0.00649713
0.000405	0.00648534
0.000406	0.00646569
0.000407	0.00644603
0.000408	0.00643817
0.000409	0.00643031
0.00041	0.00640673
0.000411	0.00637528
0.000412	0.00635563
0.000413	0.00633991
0.000414	0.00631633
0.000415	0.00628881
0.000416	0.0062613
0.000417	0.00624165
0.000418	0.00622593
0.000419	0.00620627
0.00042	0.0061709
0.000421	0.00613159
0.000422	0.00610015
0.000423	0.00606871
0.000424	0.00604512
0.000425	0.00601761
0.000426	0.00599796
0.000427	0.00598223
0.000428	0.00596258
0.000429	0.005939
0.00043	0.00590362
0.000431	0.00588004
0.000432	0.00586039
0.000433	0.00583681
0.000434	0.00582108
0.000435	0.00580143
0.000436	0.00577392
0.000437	0.0057464
0.000438	0.00572675
0.000439	0.00569924
0.00044	0.00567172
0.000441	0.00565993
0.000442	0.00564028
0.000443	0.00560884
0.000444	0.00558132
0.000445	0.00555774
0.000446	0.00553023
0.000448	0.00549485
0.000449	0.00547127
0.00045	0.00544768
0.000451	0.00541231
0.000452	0.00539266
0.000453	0.00537694
0.000454	0.00535728
0.000455	0.00534549
0.000456	0.00532584
0.000457	0.0052944
0.000458	0.00527081
0.000461	0.00525116
0.000462	0.00523151
0.000463	0.00520006
0.000464	0.00517255
0.000465	0.00514111
0.000466	0.00510573
0.000467	0.00508608
0.000468	0.00507036
0.000469	0.0050625
0.00047	0.0050507
0.000471	0.00502712
0.000472	0.00499961
0.000473	0.00497995
0.000474	0.00496816
0.000475	0.00495637
0.000476	0.00494458
0.000477	0.004921
0.000478	0.00489348
0.000479	0.00487776
0.000481	0.00485811
0.000483	0.00483846
0.000485	0.00481487
0.000486	0.00479129
0.000487	0.00477557
0.000488	0.00475985
0.000489	0.00474019
0.00049	0.00471268
0.000491	0.0046891
0.000492	0.00467731
0.000493	0.00465765
0.000494	0.004638
0.000495	0.00462228
0.000497	0.00459476
0.000498	0.00457511
0.000499	0.00455939
0.0005	0.00453581
0.000500999	0.00451615
0.000501999	0.00450436
0.000502999	0.00448864
0.000503999	0.00446899
0.000504999	0.00445327
0.000505999	0.00443361
0.000506999	0.00440217
0.000507999	0.00437466
0.000508999	0.00436286
0.000509999	0.00435107
0.000511999	0.00433142
0.000512999	0.00431177
0.000513999	0.00429998
0.000514999	0.00428818
0.000515999	0.00427246
0.000516999	0.00426067
0.000518999	0.00425281
0.000519999	0.00424495
0.000520999	0.0042253
0.000521999	0.00420564
0.000522999	0.00418992
0.000523999	0.00417027
0.000524999	0.00414276
0.000525999	0.00411917
0.000526999	0.00411131
0.000527999	0.00410345
0.000528999	0.00408773
0.000529999	0.00407201
0.000531999	0.00406415
0.000532999	0.00405628
0.000533999	0.00404842
0.000534999	0.00402484
0.000535999	0.0039934
0.000536999	0.00397767
0.000537999	0.00396588
0.000538999	0.00395016
0.000539999	0.00393837
0.000540999	0.00392658
0.000541999	0.003903
0.000542999	0.00388334
0.000543999	0.00386369
0.000544999	0.00384011
0.000545999	0.00382832
0.000546999	0.00381652
0.000547999	0.00380473
0.000549999	0.00378901
0.000550999	0.00376543
0.000551999	0.00374971
0.000552999	0.00373398
0.000553999	0.00371826
0.000554999	0.0037104
0.000555999	0.00370254
0.000556999	0.00369468
0.000558999	0.00368682
0.000559999	0.00367503
0.000561999	0.0036593
0.000562999	0.00364751
0.000563999	0.00363965
0.000565999	0.00363179
0.000566999	0.00362393
0.000567999	0.00361607
0.000569999	0.00360821
0.000570999	0.00359642
0.000571999	0.00358069
0.000573999	0.00356497
0.000575999	0.00355318
0.000576999	0.00354532
0.000577999	0.00353746
0.000579999	0.00352567
0.000580999	0.00350994
0.000581999	0.00348636
0.000583999	0.00346671
0.000584999	0.00344313
0.000585999	0.00341954
0.000586999	0.00340775
0.000589999	0.00339203
0.000590999	0.00338024
0.000591999	0.00336845
0.000592999	0.00334879
0.000593999	0.00332914
0.000595999	0.00331735
0.000596999	0.00330949
0.000599999	0.00328984
0.000600999	0.00327018
0.000601999	0.00326232
0.000602999	0.00325053
0.000603999	0.00323874
0.000606999	0.00322695
0.000607999	0.00321516
0.000609999	0.00319943
0.000611999	0.00317585
0.000612999	0.00315227
0.000613999	0.00313655
0.000614999	0.00312868
0.000615999	0.00312082
0.000616999	0.00310903
0.000618999	0.00309724
0.000619999	0.00307759
0.000620999	0.00305794
0.000622999	0.00304221
0.000623999	0.00302256
0.000624999	0.00300684
0.000625999	0.00298719
0.000626999	0.00297146
0.000627999	0.00295967
0.000628999	0.00293609
0.000629999	0.00291644
0.000630999	0.00290858
0.000635999	0.00289678
0.000637999	0.00288106
0.000639999	0.00286534
0.000640999	0.00284569
0.000643999	0.00282604
0.000644999	0.00281424
0.000647999	0.00280245
0.000648999	0.00279066
0.000650999	0.0027828
0.000652999	0.00275922
0.000653999	0.00273563
0.000654999	0.00272777
0.000656999	0.00271991
0.000657999	0.00271205
0.000660999	0.00270419
0.000661999	0.00269633
0.000662999	0.00268454
0.000663999	0.00266882
0.000665999	0.00265702
0.000666999	0.00264916
0.000667999	0.00263737
0.000668999	0.00262558
0.000669999	0.00260593
0.000670999	0.00258627
0.000671999	0.00257841
0.000672999	0.00256662
0.000673999	0.00255483
0.000674999	0.00254697
0.000675999	0.00253911
0.000677999	0.00253125
0.000678999	0.00251946
0.000679999	0.00250766
0.000680999	0.00249587
0.000684999	0.00248408
0.000685999	0.00247229
0.000686999	0.0024605
0.000689999	0.00245264
0.000690999	0.00244478
0.000691999	0.00243298
0.000693999	0.00241726
0.000694999	0.00240154
0.000695999	0.00238975
0.000696999	0.00238189
0.000697999	0.00237403
0.000699999	0.00236617
0.000700999	0.00235831
0.000701999	0.00235044
0.000702999	0.00234258
0.000704999	0.00233472
0.000705999	0.00232293
0.000706999	0.00231114
0.000707999	0.00230328
0.000709999	0.00229542
0.000710999	0.00228363
0.000711999	0.00225218
0.000713999	0.00222467
0.000714999	0.00221288
0.000716999	0.00219715
0.000717999	0.00218536
0.000719999	0.00217357
0.000720999	0.00215785
0.000721999	0.00214213
0.000725999	0.00213034
0.000726999	0.00212247
0.000728999	0.00211068
0.000729999	0.00209889
0.000730999	0.00208317
0.000731999	0.00206352
0.000739999	0.00204779
0.000743999	0.002036
0.000746999	0.00202814
0.000750999	0.00201635
0.000753999	0.00200063
0.000754999	0.00198491
0.000755999	0.00196525
0.000757999	0.00194953
0.000761999	0.00194167
0.000762999	0.00192988
0.000765999	0.00191809
0.000767999	0.00191023
0.000769999	0.00190237
0.000772999	0.00189057
0.000774999	0.00187485
0.000778999	0.00186306
0.000780999	0.0018552
0.000782999	0.00183948
0.000783999	0.00182376
0.000788999	0.00181589
0.000789999	0.0018041
0.000791999	0.00179231
0.000793999	0.00178445
0.000795999	0.00177659
0.000796999	0.00176873
0.000798999	0.00176087
0.000801999	0.00175301
0.000802999	0.00174515
0.000803999	0.00173728
0.000804999	0.00172942
0.000810999	0.00172156
0.000811999	0.0017137
0.000813999	0.00169798
0.000815999	0.00168226
0.000816999	0.00166654
0.000817999	0.00165081
0.000819999	0.00164295
0.000825999	0.00163509
0.000827999	0.0016233
0.000830999	0.00160365
0.000832999	0.00158793
0.000835999	0.00158006
0.000840999	0.0015722
0.000841999	0.00156041
0.000842999	0.00154862
0.000845999	0.00154076
0.000846999	0.0015329
0.000848999	0.00152504
0.000855999	0.00151325
0.000856999	0.00150145
0.000857999	0.00149359
0.000858999	0.0014818
0.000859999	0.00147001
0.000865999	0.00146215
0.000867999	0.00145429
0.000869999	0.00144643
0.000873999	0.00143857
0.000877999	0.00143071
0.000878999	0.00142284
0.000879999	0.00141498
0.000880999	0.00140712
0.000882999	0.00139926
0.000887999	0.0013914
0.000888999	0.00138354
0.000890999	0.00137568
0.000891999	0.00136782
0.000892999	0.00135996
0.000897999	0.00134816
0.000899999	0.00133637
0.000908999	0.00132851
0.000910999	0.00131672
0.000916999	0.00130493
0.000919999	0.00129707
0.000920999	0.00128921
0.000925999	0.00127742
0.000928999	0.00126562
0.000930999	0.00125776
0.000931999	0.0012499
0.000934999	0.00124204
0.000937999	0.00123025
0.000943999	0.00121846
0.000952999	0.0012106
0.000958999	0.00120274
0.000963999	0.00119094
0.000965999	0.00117915
0.000966999	0.00117129
0.000967999	0.00116343
0.000970999	0.00115557
0.000974999	0.00114378
0.000975999	0.00113199
0.000977999	0.00112413
0.000980999	0.00111626
0.000984999	0.0011084
0.000986999	0.00109661
0.000987999	0.00108482
0.000990999	0.00107696
0.000995999	0.0010691
0.000998999	0.00106124
0.001001	0.00105338
0.001009	0.00104552
0.001014	0.00103765
0.001027	0.00102979
0.001044	0.00102193
0.001045	0.00101407
0.001049	0.00100621
0.001054	0.000998349
0.001056	0.000990488
0.001057	0.000982627
0.001058	0.000974766
0.001085	0.000966905
0.001088	0.000959044
0.00109	0.000951183
0.001097	0.000943322
0.001105	0.000935461
0.00111	0.0009276
0.001111	0.000919739
0.001112	0.000911878
0.001115	0.000904017
0.001122	0.000896156
0.001123	0.000888295
0.001124	0.000880434
0.001126	0.000868642
0.001131	0.000856851
0.001134	0.00084899
0.001141	0.000841129
0.001144	0.000833268
0.001146	0.000821476
0.001148	0.000809685
0.001152	0.000801824
0.001154	0.000793963
0.001155	0.000786102
0.00116	0.000778241
0.001161	0.00077038
0.001162	0.000762519
0.001164	0.000754658
0.001175	0.000746797
0.001177	0.000738936
0.001178	0.000731075
0.00118	0.000719283
0.001183	0.000707492
0.001188	0.000699631
0.001198	0.00069177
0.001214	0.000683908
0.001219	0.000676047
0.001222	0.000668186
0.001223	0.000660325
0.00123	0.000652464
0.001235	0.000644603
0.001241	0.000636742
0.001246	0.000628881
0.00125	0.00062102
0.001252	0.000613159
0.001296	0.000605298
0.001299	0.000597437
0.001315	0.000589576
0.001326	0.000581715
0.001328	0.000573854
0.001329	0.000558132
0.001334	0.00054241
0.001336	0.000534549
0.001341	0.000526688
0.001352	0.000518827
0.001359	0.000510966
0.00136	0.000503105
0.00137	0.000495244
0.001386	0.000487383
0.001391	0.000479522
0.001394	0.000471661
0.001401	0.0004638
0.001412	0.000455939
0.001436	0.000448078
0.001442	0.000440217
0.001449	0.000432356
0.001453	0.000424495
0.001456	0.000416634
0.001478	0.000408773
0.001492	0.000400912
0.001505	0.000393051
0.001523	0.00038519
0.001539	0.000377329
0.001543	0.000369468
0.001544	0.000361607
0.00158	0.000349815
0.001591	0.000338024
0.001593	0.000330163
0.001598	0.000322302
0.001617	0.000314441
0.001625	0.00030658
0.001628	0.000294788
0.001644	0.000282997
0.001654	0.000275136
0.001659	0.000267275
0.001668	0.000259414
0.001682	0.000251553
0.001747	0.000243692
0.001774	0.000235831
0.001779	0.000227969
0.001791	0.000220108
0.0018	0.000212247
0.001811	0.000204386
0.001812	0.000196525
0.00182	0.000188664
0.001959	0.000180803
0.002014	0.000172942
0.002027	0.000165081
0.002055	0.00015722
0.002067	0.000149359
0.002093	0.000141498
0.002098	0.000133637
0.002106	0.000125776
0.002156	0.000117915
0.002179	0.000110054
0.002222	0.000102193
0.002257	9.43322e-05
0.002284	8.64712e-05
0.002325	7.86102e-05
0.0024	7.07492e-05
0.002461	6.28881e-05
0.002536	5.50271e-05
0.002559	4.71661e-05
0.002595	3.93051e-05
0.00268	3.14441e-05
0.002703	2.35831e-05
0.002739	1.5722e-05
0.002782	7.86102e-06
0.00387	0

## Sheet: s=-0.1
0	0.995015
9.99999e-07	0.839441
2e-06	0.614362
3e-06	0.500294
4e-06	0.433439
5e-06	0.386836
5.99999e-06	0.351366
6.99999e-06	0.323671
7.99999e-06	0.301834
8.99999e-06	0.282934
9.99999e-06	0.266963
1.1e-05	0.253284
1.2e-05	0.241339
1.3e-05	0.230667
1.4e-05	0.221398
1.5e-05	0.21308
1.6e-05	0.205364
1.7e-05	0.198213
1.8e-05	0.191505
1.9e-05	0.185454
2e-05	0.180081
2.1e-05	0.175205
2.2e-05	0.170478
2.3e-05	0.165955
2.4e-05	0.161812
2.5e-05	0.158005
2.6e-05	0.154402
2.7e-05	0.151081
2.8e-05	0.147713
2.9e-05	0.144341
3e-05	0.141251
3.1e-05	0.138357
3.2e-05	0.135643
3.3e-05	0.133117
3.4e-05	0.13074
3.5e-05	0.128371
3.6e-05	0.125986
3.7e-05	0.123711
3.8e-05	0.121709
3.9e-05	0.119802
4e-05	0.11795
4.1e-05	0.11607
4.2e-05	0.114221
4.3e-05	0.112541
4.4e-05	0.110885
4.5e-05	0.109193
4.6e-05	0.107493
4.7e-05	0.105982
4.8e-05	0.104611
4.9e-05	0.103115
5e-05	0.101501
5.09999e-05	0.100013
5.19999e-05	0.0986622
5.29999e-05	0.0973072
5.39999e-05	0.0959678
5.49999e-05	0.0947734
5.59999e-05	0.0936886
5.69999e-05	0.0925646
5.79999e-05	0.0914876
5.89999e-05	0.0903754
5.99999e-05	0.0892945
6.09999e-05	0.0883037
6.19999e-05	0.0872933
6.29999e-05	0.0863691
6.39999e-05	0.0854918
6.49999e-05	0.0846185
6.59999e-05	0.0837765
6.69999e-05	0.0828993
6.79999e-05	0.0819907
6.89999e-05	0.0811409
6.99999e-05	0.0802911
7.09999e-05	0.0794373
7.19999e-05	0.0785875
7.29999e-05	0.0777337
7.39999e-05	0.0769113
7.49999e-05	0.0761555
7.59999e-05	0.0754466
7.69999e-05	0.07473
7.79999e-05	0.0739859
7.89999e-05	0.0733162
7.99999e-05	0.0727523
8.09999e-05	0.0721022
8.19999e-05	0.0714012
8.29999e-05	0.0707981
8.39999e-05	0.0701832
8.49999e-05	0.0695214
8.59999e-05	0.0689183
8.69999e-05	0.06837
8.79999e-05	0.0678217
8.89999e-05	0.0672617
8.99999e-05	0.0667526
9.09999e-05	0.0662043
9.19999e-05	0.0655855
9.29999e-05	0.065049
9.39999e-05	0.0645085
9.49999e-05	0.0639407
9.59999e-05	0.0634472
9.69999e-05	0.0629812
9.79999e-05	0.0624408
9.89999e-05	0.0618337
9.99999e-05	0.0613051
0.000101	0.0608508
0.000102	0.0603652
0.000103	0.0598286
0.000104	0.059296
0.000105	0.0588417
0.000106	0.0584619
0.000107	0.0580898
0.000108	0.057706
0.000109	0.0572909
0.00011	0.0568993
0.000111	0.0565076
0.000112	0.0560534
0.000113	0.0556226
0.000114	0.0552819
0.000115	0.0549372
0.000116	0.0544986
0.000117	0.0541148
0.000118	0.053778
0.000119	0.0533472
0.00012	0.0529634
0.000121	0.0526384
0.000122	0.0522703
0.000123	0.05191
0.000124	0.0516202
0.000125	0.0513421
0.000126	0.051021
0.000127	0.0506763
0.000128	0.0503552
0.000129	0.0500576
0.00013	0.0497873
0.000131	0.0494975
0.000132	0.0491568
0.000133	0.0488631
0.000134	0.0485185
0.000135	0.0481778
0.000136	0.0479271
0.000137	0.0476412
0.000138	0.0473084
0.000139	0.0470029
0.00014	0.0467366
0.000141	0.0464546
0.000142	0.0460943
0.000143	0.0457458
0.000144	0.0454599
0.000145	0.0452053
0.000146	0.0449586
0.000147	0.0446923
0.000148	0.0444338
0.000149	0.0441793
0.00015	0.0439482
0.000151	0.0437172
0.000152	0.0434587
0.000153	0.0432041
0.000154	0.0429417
0.000155	0.0426793
0.000156	0.04246
0.000157	0.0422564
0.000158	0.0420292
0.000159	0.0417708
0.00016	0.0415006
0.000161	0.0412499
0.000162	0.0409875
0.000163	0.040729
0.000164	0.040498
0.000165	0.0402904
0.000166	0.0400985
0.000167	0.0399066
0.000168	0.0397382
0.000169	0.0395581
0.00017	0.0393349
0.000171	0.0390921
0.000172	0.038861
0.000173	0.0386495
0.000174	0.038438
0.000175	0.0382501
0.000176	0.0380582
0.000177	0.037831
0.000178	0.037643
0.000179	0.0374707
0.00018	0.0372671
0.000181	0.0370674
0.000182	0.036852
0.000183	0.0366483
0.000184	0.0364917
0.000185	0.0363272
0.000186	0.0361627
0.000187	0.0359825
0.000188	0.0357828
0.000189	0.0356105
0.00019	0.0354774
0.000191	0.0353403
0.000192	0.035168
0.000193	0.0350035
0.000194	0.0348547
0.000195	0.0347098
0.000196	0.0345492
0.000197	0.0343691
0.000198	0.0342242
0.000199	0.0340832
0.0002	0.0339226
0.000201	0.0337738
0.000202	0.0336289
0.000203	0.0335192
0.000204	0.0334017
0.000205	0.0332568
0.000206	0.0331433
0.000207	0.0330179
0.000208	0.0328926
0.000209	0.0327438
0.00021	0.0325832
0.000211	0.0324775
0.000212	0.0323522
0.000213	0.0322034
0.000214	0.0320506
0.000215	0.0318979
0.000216	0.0317647
0.000217	0.0316355
0.000218	0.0314828
0.000219	0.0313183
0.00022	0.0311734
0.000221	0.0310598
0.000222	0.0309619
0.000223	0.0308053
0.000224	0.0306408
0.000225	0.0305194
0.000226	0.0303666
0.000227	0.0302139
0.000228	0.0300847
0.000229	0.0299515
0.00023	0.029834
0.000231	0.0297244
0.000232	0.0296108
0.000233	0.0294698
0.000234	0.0293093
0.000235	0.0291761
0.000236	0.0290273
0.000237	0.0288745
0.000238	0.028714
0.000239	0.0285652
0.00024	0.0284555
0.000241	0.0283615
0.000242	0.0282793
0.000243	0.0281775
0.000244	0.028056
0.000245	0.0279307
0.000246	0.027825
0.000247	0.0277427
0.000248	0.027637
0.000249	0.0275039
0.00025	0.0273864
0.000251	0.0272767
0.000252	0.0271631
0.000253	0.0270496
0.000254	0.0269321
0.000255	0.0268068
0.000256	0.0266932
0.000257	0.0265718
0.000258	0.026466
0.000259	0.0263603
0.00026	0.0262507
0.000261	0.0261527
0.000262	0.0260548
0.000263	0.0259883
0.000264	0.0259217
0.000265	0.0258238
0.000266	0.025718
0.000267	0.0256358
0.000268	0.0255536
0.000269	0.0254831
0.00027	0.0254243
0.000271	0.0253264
0.000272	0.0252011
0.000273	0.0250993
0.000274	0.025021
0.000275	0.0249348
0.000276	0.0248486
0.000277	0.0247781
0.000278	0.0247116
0.000279	0.0246254
0.00028	0.0245275
0.000281	0.0244374
0.000282	0.0243591
0.000283	0.0242729
0.000284	0.0241946
0.000285	0.0241163
0.000286	0.0240341
0.000287	0.0239792
0.000288	0.023897
0.000289	0.023803
0.00029	0.0237208
0.000291	0.0236307
0.000292	0.0235289
0.000293	0.0234231
0.000294	0.0233213
0.000295	0.0232351
0.000296	0.0231568
0.000297	0.0230707
0.000298	0.0230002
0.000299	0.0229297
0.0003	0.0228553
0.000301	0.0227848
0.000302	0.022726
0.000303	0.0226634
0.000304	0.022585
0.000305	0.0225106
0.000306	0.022448
0.000307	0.0223892
0.000308	0.0222835
0.000309	0.0221582
0.00031	0.022072
0.000311	0.0220172
0.000312	0.0219702
0.000313	0.0219075
0.000314	0.0218135
0.000315	0.0217195
0.000316	0.0216412
0.000317	0.0215512
0.000318	0.0214846
0.000319	0.0214454
0.00032	0.0214023
0.000321	0.0213514
0.000322	0.0212927
0.000323	0.0212378
0.000324	0.0211595
0.000325	0.0210655
0.000326	0.020995
0.000327	0.020905
0.000328	0.020811
0.000329	0.0207366
0.00033	0.0206504
0.000331	0.0205643
0.000332	0.0204977
0.000333	0.0204507
0.000334	0.0204115
0.000335	0.0203724
0.000336	0.0203214
0.000337	0.0202588
0.000338	0.0202079
0.000339	0.0201491
0.00034	0.020063
0.000341	0.0199651
0.000342	0.0198789
0.000343	0.0198006
0.000344	0.0197183
0.000345	0.0196361
0.000346	0.0195656
0.000347	0.0195108
0.000348	0.0194481
0.000349	0.0193698
0.00035	0.0193032
0.000351	0.0192406
0.000352	0.0191896
0.000353	0.0191544
0.000354	0.01908
0.000355	0.0189938
0.000356	0.0189468
0.000357	0.0188998
0.000358	0.0188254
0.000359	0.0187628
0.00036	0.0187236
0.000361	0.0186962
0.000362	0.0186492
0.000363	0.0186022
0.000364	0.0185787
0.000365	0.0185513
0.000366	0.0185239
0.000367	0.0184886
0.000368	0.0184338
0.000369	0.0183672
0.00037	0.0183202
0.000371	0.0182889
0.000372	0.0182262
0.000373	0.0181558
0.000374	0.0181048
0.000375	0.01805
0.000376	0.0180069
0.000377	0.0179678
0.000378	0.0179286
0.000379	0.017909
0.00038	0.0178699
0.000381	0.0178229
0.000382	0.0177837
0.000383	0.0177328
0.000384	0.0176819
0.000385	0.0176466
0.000386	0.0176271
0.000387	0.0176153
0.000388	0.0175996
0.000389	0.0175566
0.00039	0.0175096
0.000391	0.0174743
0.000392	0.0174313
0.000393	0.0173882
0.000394	0.017349
0.000395	0.0173059
0.000396	0.0172472
0.000397	0.0171806
0.000398	0.0171219
0.000399	0.0170631
0.0004	0.0170122
0.000401	0.016973
0.000402	0.01693
0.000403	0.0168986
0.000404	0.0168595
0.000405	0.0168007
0.000406	0.0167577
0.000407	0.0167342
0.000408	0.0167067
0.000409	0.0166519
0.00041	0.0165971
0.000411	0.016554
0.000412	0.0165109
0.000413	0.0164718
0.000414	0.0164365
0.000415	0.0163895
0.000416	0.0163425
0.000417	0.0163151
0.000418	0.0162799
0.000419	0.0162368
0.00042	0.016178
0.000421	0.0161232
0.000422	0.0160841
0.000423	0.016041
0.000424	0.0160018
0.000425	0.0159744
0.000426	0.0159274
0.000427	0.0158687
0.000428	0.0158178
0.000429	0.0157668
0.00043	0.0157159
0.000431	0.0156494
0.000432	0.0155945
0.000433	0.0155475
0.000434	0.0154888
0.000435	0.0154418
0.000436	0.0153987
0.000437	0.0153478
0.000438	0.015293
0.000439	0.0152381
0.00044	0.015199
0.000441	0.0151677
0.000442	0.0151167
0.000443	0.0150658
0.000444	0.0150267
0.000445	0.0149914
0.000446	0.0149718
0.000447	0.0149327
0.000448	0.0148818
0.000449	0.0148387
0.00045	0.0147799
0.000451	0.0147251
0.000452	0.0146781
0.000453	0.0146468
0.000454	0.0146076
0.000455	0.0145567
0.000456	0.0145176
0.000457	0.0144745
0.000458	0.0144314
0.000459	0.014404
0.00046	0.0143687
0.000461	0.0143296
0.000462	0.0143022
0.000463	0.0142591
0.000464	0.0142121
0.000465	0.0141651
0.000466	0.014122
0.000467	0.0140868
0.000468	0.0140594
0.000469	0.0140437
0.00047	0.0140202
0.000471	0.0139849
0.000472	0.0139614
0.000473	0.0139184
0.000474	0.0138714
0.000475	0.0138518
0.000476	0.01384
0.000477	0.0138244
0.000478	0.013797
0.000479	0.0137696
0.00048	0.0137421
0.000481	0.0137147
0.000482	0.0136873
0.000483	0.0136364
0.000484	0.0135933
0.000485	0.0135737
0.000486	0.0135581
0.000487	0.0135463
0.000488	0.0135189
0.000489	0.0134876
0.00049	0.0134641
0.000491	0.0134445
0.000492	0.0134171
0.000493	0.0133897
0.000494	0.0133701
0.000496	0.0133505
0.000497	0.0133309
0.000498	0.0132996
0.000499	0.0132604
0.0005	0.0132291
0.000500999	0.0131978
0.000501999	0.0131625
0.000502999	0.0131312
0.000503999	0.0130999
0.000504999	0.0130725
0.000505999	0.013049
0.000506999	0.013002
0.000507999	0.0129471
0.000508999	0.0129197
0.000509999	0.0129001
0.000510999	0.0128727
0.000511999	0.0128375
0.000512999	0.0127944
0.000513999	0.012767
0.000514999	0.0127592
0.000515999	0.0127474
0.000516999	0.0127161
0.000517999	0.0126808
0.000518999	0.0126613
0.000519999	0.0126378
0.000520999	0.0126143
0.000521999	0.0125908
0.000522999	0.0125555
0.000523999	0.0125281
0.000524999	0.0125007
0.000525999	0.0124733
0.000526999	0.0124615
0.000527999	0.0124419
0.000528999	0.0124145
0.000529999	0.012391
0.000530999	0.0123558
0.000531999	0.0123127
0.000532999	0.0122696
0.000533999	0.0122344
0.000534999	0.012203
0.000535999	0.0121796
0.000536999	0.01216
0.000537999	0.0121286
0.000538999	0.0121012
0.000539999	0.012066
0.000540999	0.0120268
0.000541999	0.0120033
0.000542999	0.0119759
0.000543999	0.0119446
0.000544999	0.0119172
0.000545999	0.0118897
0.000546999	0.0118623
0.000547999	0.0118349
0.000548999	0.0118075
0.000549999	0.011784
0.000550999	0.0117683
0.000551999	0.0117566
0.000552999	0.0117292
0.000553999	0.0116939
0.000554999	0.0116665
0.000555999	0.011643
0.000556999	0.0116195
0.000557999	0.0115882
0.000558999	0.0115686
0.000559999	0.011549
0.000560999	0.0115099
0.000561999	0.011459
0.000562999	0.0114159
0.000563999	0.0113885
0.000564999	0.0113571
0.000565999	0.011318
0.000566999	0.0112866
0.000567999	0.0112631
0.000568999	0.0112318
0.000569999	0.0112044
0.000570999	0.011177
0.000571999	0.0111378
0.000572999	0.0111104
0.000573999	0.0110869
0.000574999	0.0110478
0.000575999	0.0110164
0.000576999	0.0110047
0.000577999	0.010989
0.000578999	0.0109616
0.000579999	0.0109303
0.000580999	0.0108989
0.000581999	0.0108598
0.000582999	0.0108245
0.000583999	0.0107971
0.000584999	0.0107619
0.000585999	0.0107227
0.000586999	0.0106835
0.000587999	0.0106444
0.000588999	0.0106091
0.000589999	0.0105817
0.000590999	0.0105661
0.000591999	0.0105426
0.000592999	0.0105073
0.000593999	0.0104838
0.000594999	0.0104525
0.000595999	0.0104212
0.000596999	0.0104016
0.000597999	0.010382
0.000598999	0.0103702
0.000599999	0.0103467
0.000600999	0.0103154
0.000601999	0.0102841
0.000602999	0.0102567
0.000603999	0.0102371
0.000604999	0.0102097
0.000605999	0.0101862
0.000606999	0.0101627
0.000607999	0.0101431
0.000608999	0.0101314
0.000609999	0.0101039
0.000610999	0.0100726
0.000611999	0.0100569
0.000612999	0.0100413
0.000613999	0.0100217
0.000614999	0.0100021
0.000615999	0.00997078
0.000616999	0.00993945
0.000617999	0.00991987
0.000618999	0.00989638
0.000619999	0.00987288
0.000622999	0.00985721
0.000623999	0.00984155
0.000624999	0.00982197
0.000625999	0.00979847
0.000626999	0.00977497
0.000627999	0.00975931
0.000628999	0.00973973
0.000629999	0.00971231
0.000630999	0.00969665
0.000631999	0.0096849
0.000632999	0.00966923
0.000633999	0.00965748
0.000634999	0.00964574
0.000635999	0.00963399
0.000636999	0.00961049
0.000637999	0.00958308
0.000639999	0.00956349
0.000641999	0.00953608
0.000642999	0.00950475
0.000643999	0.00948125
0.000644999	0.0094695
0.000645999	0.00945384
0.000646999	0.00943426
0.000647999	0.00941468
0.000648999	0.00939118
0.000649999	0.00936768
0.000650999	0.00935202
0.000651999	0.00934027
0.000652999	0.00932852
0.000653999	0.00932069
0.000654999	0.00930894
0.000655999	0.00928936
0.000656999	0.00927369
0.000657999	0.00925019
0.000658999	0.00921886
0.000659999	0.00919928
0.000660999	0.0091797
0.000661999	0.00916012
0.000663999	0.00913662
0.000664999	0.00910921
0.000665999	0.00909354
0.000666999	0.00908179
0.000667999	0.00907005
0.000668999	0.00906221
0.000669999	0.00905438
0.000670999	0.00904263
0.000671999	0.00903088
0.000672999	0.00901913
0.000673999	0.00899955
0.000674999	0.00897997
0.000675999	0.00896431
0.000676999	0.00895256
0.000677999	0.00894473
0.000678999	0.00893298
0.000679999	0.00890165
0.000680999	0.00887423
0.000681999	0.00886248
0.000682999	0.00883899
0.000683999	0.00881941
0.000684999	0.00881157
0.000686999	0.00879982
0.000687999	0.00878024
0.000688999	0.00876458
0.000689999	0.00874891
0.000690999	0.00873325
0.000692999	0.00872542
0.000693999	0.00871367
0.000694999	0.00869017
0.000695999	0.00865884
0.000696999	0.00863534
0.000697999	0.00862359
0.000698999	0.00860793
0.000699999	0.00859226
0.000700999	0.00858051
0.000701999	0.0085531
0.000703999	0.00852177
0.000704999	0.00849044
0.000705999	0.00845519
0.000706999	0.0084317
0.000707999	0.00841603
0.000708999	0.00840428
0.000709999	0.00839645
0.000710999	0.00838862
0.000711999	0.00837295
0.000712999	0.00835729
0.000713999	0.00834554
0.000714999	0.00832987
0.000715999	0.00831421
0.000716999	0.00829463
0.000717999	0.00827896
0.000719999	0.00827113
0.000721999	0.00825547
0.000722999	0.0082398
0.000723999	0.00823197
0.000724999	0.00822022
0.000725999	0.00820064
0.000727999	0.00818106
0.000728999	0.00816148
0.000729999	0.00814189
0.000730999	0.00811448
0.000731999	0.00808707
0.000732999	0.0080714
0.000733999	0.00805965
0.000734999	0.00805182
0.000735999	0.00803615
0.000736999	0.00801657
0.000737999	0.00800482
0.000738999	0.00798133
0.000739999	0.00795783
0.000740999	0.00794216
0.000741999	0.00792258
0.000742999	0.007903
0.000743999	0.0078795
0.000744999	0.00785601
0.000746999	0.00784034
0.000748999	0.00782076
0.000749999	0.00780118
0.000750999	0.00779335
0.000751999	0.0077816
0.000753999	0.00776593
0.000754999	0.00775027
0.000755999	0.00773852
0.000756999	0.00772285
0.000757999	0.00770327
0.000758999	0.00768369
0.000759999	0.00766411
0.000760999	0.00764453
0.000761999	0.00762495
0.000762999	0.00760928
0.000764999	0.00758187
0.000765999	0.00754662
0.000766999	0.00752704
0.000767999	0.00751529
0.000768999	0.00750354
0.000769999	0.0074918
0.000770999	0.00748005
0.000771999	0.00746438
0.000772999	0.00744872
0.000773999	0.00744088
0.000774999	0.00742914
0.000775999	0.00741739
0.000776999	0.00740564
0.000777999	0.00736648
0.000778999	0.0073234
0.000779999	0.00730773
0.000780999	0.00729598
0.000781999	0.00728032
0.000783999	0.00726857
0.000784999	0.00726074
0.000785999	0.0072529
0.000786999	0.00724507
0.000787999	0.00723332
0.000789999	0.00721374
0.000791999	0.00719024
0.000793999	0.00717066
0.000794999	0.00715891
0.000795999	0.00715108
0.000796999	0.00714325
0.000797999	0.0071315
0.000799999	0.00711975
0.000800999	0.00711192
0.000801999	0.00709625
0.000802999	0.00707667
0.000804999	0.00706492
0.000805999	0.00705709
0.000806999	0.00704926
0.000807999	0.00703751
0.000808999	0.00702576
0.000809999	0.00701793
0.000810999	0.00700226
0.000811999	0.00697877
0.000813999	0.0069631
0.000814999	0.00695527
0.000815999	0.00694352
0.000816999	0.00693177
0.000817999	0.00691611
0.000818999	0.00688869
0.000819999	0.00686519
0.000820999	0.00685345
0.000824999	0.00684561
0.000825999	0.00683386
0.000826999	0.0068182
0.000827999	0.00679862
0.000828999	0.00678295
0.000829999	0.00677512
0.000830999	0.00676337
0.000831999	0.00675162
0.000833999	0.00674379
0.000836999	0.00673204
0.000837999	0.00671638
0.000839999	0.00670463
0.000840999	0.0066968
0.000841999	0.00668113
0.000845999	0.00666155
0.000846999	0.0066498
0.000849999	0.00663414
0.000850999	0.00660672
0.000851999	0.00658714
0.000852999	0.00656756
0.000853999	0.00654798
0.000855999	0.00654015
0.000856999	0.00653231
0.000857999	0.00652056
0.000858999	0.00650882
0.000859999	0.00650098
0.000860999	0.00648923
0.000861999	0.00646965
0.000862999	0.00645399
0.000863999	0.00644224
0.000864999	0.00643049
0.000865999	0.00641874
0.000866999	0.00640308
0.000868999	0.0063835
0.000869999	0.00636391
0.000870999	0.00635217
0.000871999	0.00634042
0.000872999	0.00632867
0.000875999	0.00632084
0.000877999	0.006313
0.000878999	0.00630125
0.000879999	0.00628559
0.000881999	0.00626601
0.000882999	0.00625034
0.000883999	0.00624251
0.000884999	0.00623468
0.000885999	0.00622293
0.000886999	0.00620726
0.000887999	0.00619552
0.000888999	0.00618377
0.000889999	0.0061681
0.000890999	0.00615635
0.000891999	0.0061446
0.000892999	0.00612894
0.000893999	0.00610544
0.000894999	0.00608194
0.000895999	0.00607019
0.000896999	0.00606236
0.000897999	0.00605061
0.000898999	0.00603103
0.000899999	0.00601537
0.000900999	0.00600753
0.000901999	0.00599187
0.000903999	0.00596446
0.000904999	0.00593704
0.000905999	0.00591746
0.000907999	0.0059018
0.000908999	0.00589005
0.000909999	0.00587438
0.000910999	0.00585872
0.000913999	0.00584305
0.000914999	0.00582347
0.000915999	0.00581172
0.000916999	0.00579606
0.000918999	0.00577648
0.000919999	0.00575689
0.000924999	0.00574123
0.000926999	0.00572948
0.000927999	0.00570598
0.000928999	0.00568249
0.000929999	0.00567074
0.000930999	0.0056629
0.000931999	0.00565507
0.000932999	0.00563941
0.000933999	0.00562374
0.000935999	0.00561199
0.000936999	0.00560024
0.000937999	0.00559241
0.000939999	0.00557283
0.000940999	0.00555325
0.000941999	0.00554542
0.000942999	0.00553758
0.000943999	0.00552584
0.000944999	0.00551017
0.000946999	0.00549842
0.000947999	0.00548667
0.000948999	0.00547101
0.000949999	0.00545926
0.000950999	0.00545143
0.000951999	0.00543576
0.000952999	0.0054201
0.000954999	0.00541226
0.000955999	0.00540443
0.000956999	0.0053966
0.000957999	0.00538485
0.000958999	0.0053731
0.000960999	0.00536135
0.000961999	0.0053496
0.000962999	0.00533786
0.000963999	0.00532611
0.000964999	0.00531436
0.000966999	0.00529478
0.000967999	0.0052752
0.000970999	0.00526345
0.000971999	0.00525561
0.000972999	0.00524387
0.000978999	0.00523212
0.000981999	0.00522037
0.000982999	0.00520862
0.000983999	0.00520079
0.000984999	0.00518904
0.000985999	0.00517337
0.000986999	0.00515771
0.000987999	0.00514596
0.000989999	0.00513813
0.000990999	0.00512638
0.000992999	0.0051068
0.000993999	0.00509113
0.000994999	0.00507155
0.000995999	0.00505197
0.000996999	0.00503239
0.000997999	0.00500889
0.000999999	0.00499714
0.001001	0.00498148
0.001002	0.00496581
0.001005	0.00495015
0.001006	0.00493448
0.001007	0.00492665
0.001008	0.00491882
0.00101	0.00490707
0.001011	0.00489532
0.001013	0.00488749
0.001014	0.00487574
0.001015	0.00486399
0.00102	0.00484832
0.001023	0.00482874
0.001025	0.00481699
0.001026	0.00480916
0.00103	0.00480133
0.001031	0.00478566
0.001032	0.00477
0.001033	0.00476217
0.001034	0.00475433
0.001035	0.0047465
0.001036	0.00473867
0.001038	0.004723
0.001039	0.00470734
0.00104	0.00469951
0.001042	0.00468776
0.001044	0.00466818
0.001045	0.00464859
0.001047	0.00463685
0.001049	0.00462901
0.00105	0.00462118
0.001051	0.00460943
0.001053	0.00459768
0.001055	0.0045781
0.001056	0.00455069
0.001057	0.00452719
0.001059	0.00450761
0.00106	0.00449194
0.001061	0.0044802
0.001063	0.00446453
0.001065	0.00444887
0.001071	0.00444103
0.001072	0.00442537
0.001073	0.0044097
0.001076	0.00440187
0.001078	0.00439012
0.001079	0.00437837
0.00108	0.00437054
0.001081	0.00436271
0.001082	0.00435488
0.001083	0.00434313
0.001084	0.00433138
0.001086	0.00431963
0.001087	0.00430788
0.00109	0.00430005
0.001091	0.00429222
0.001092	0.00428438
0.001093	0.00427655
0.001094	0.00426872
0.001095	0.00425305
0.001098	0.00423739
0.001099	0.00421389
0.0011	0.00419039
0.001101	0.00418256
0.001103	0.00417473
0.001104	0.0041669
0.001105	0.00415906
0.001107	0.00415123
0.001109	0.0041434
0.00111	0.00413557
0.001111	0.00412773
0.001115	0.0041199
0.001116	0.00411207
0.001117	0.00410424
0.001118	0.0040964
0.001119	0.00408857
0.00112	0.00407682
0.001123	0.00406507
0.001124	0.00404941
0.001125	0.00403374
0.001126	0.00402199
0.001127	0.00400633
0.001129	0.00399458
0.00113	0.00398283
0.001131	0.00396717
0.001133	0.0039515
0.001135	0.00393975
0.00114	0.00393192
0.001143	0.00392017
0.001144	0.00390842
0.001145	0.00389667
0.001147	0.00388101
0.001148	0.00386926
0.001149	0.00386143
0.00115	0.00385359
0.001153	0.00384576
0.001156	0.00383401
0.00116	0.00382226
0.001161	0.00381052
0.001162	0.00379877
0.001165	0.00379093
0.001169	0.0037831
0.001171	0.00377527
0.001174	0.00376744
0.001177	0.0037596
0.001178	0.00375177
0.00118	0.00374002
0.001185	0.00372436
0.001186	0.00371261
0.001189	0.00370478
0.00119	0.00369694
0.001191	0.00368911
0.001192	0.00366953
0.001193	0.00364995
0.001195	0.00364212
0.001197	0.00363428
0.001198	0.00362254
0.001199	0.00361079
0.0012	0.00360295
0.001202	0.00359512
0.001209	0.00358337
0.001213	0.00357162
0.001214	0.00356379
0.001218	0.00355596
0.00122	0.00354813
0.001221	0.00354029
0.001224	0.00353246
0.001228	0.00352463
0.001229	0.0035168
0.001231	0.00350896
0.001234	0.00350113
0.001235	0.0034933
0.001236	0.00348547
0.001237	0.00347372
0.00124	0.00346197
0.001242	0.00345022
0.001244	0.00343456
0.001249	0.00342281
0.00125	0.00341497
0.001251	0.00340714
0.001252	0.00339931
0.001253	0.00339148
0.001254	0.00338364
0.00126	0.0033719
0.001262	0.00336015
0.001272	0.00335231
0.001274	0.00334448
0.001275	0.00333665
0.001276	0.00332882
0.001277	0.00332098
0.001279	0.00331315
0.00128	0.00330532
0.001281	0.00329749
0.00129	0.00328965
0.001296	0.00327791
0.001299	0.00326616
0.0013	0.00325832
0.001303	0.00324658
0.001304	0.00323483
0.001306	0.00322699
0.001309	0.00321916
0.001319	0.00321133
0.00132	0.0032035
0.001323	0.00319566
0.001324	0.00318783
0.001326	0.00318
0.001327	0.00317217
0.001328	0.00316433
0.001331	0.00315259
0.001342	0.00314084
0.001349	0.00312909
0.001353	0.00311734
0.001354	0.00310559
0.001356	0.00308993
0.001358	0.00307818
0.00136	0.00307034
0.001361	0.00306251
0.001369	0.00305468
0.00137	0.00304685
0.001376	0.00303901
0.001382	0.00302726
0.001384	0.00301552
0.001387	0.00300768
0.001389	0.00299985
0.00139	0.00299202
0.001393	0.00298419
0.001394	0.00297635
0.001395	0.00296852
0.001396	0.00296069
0.001398	0.00295286
0.0014	0.00294111
0.001406	0.00292936
0.00141	0.00292153
0.001414	0.00291369
0.001416	0.00290586
0.001418	0.00289803
0.001421	0.00288628
0.001425	0.0028667
0.001427	0.00285103
0.001428	0.00283928
0.00143	0.00282362
0.001434	0.00281187
0.001436	0.00280012
0.001438	0.00278837
0.001443	0.00278054
0.001446	0.00277271
0.001448	0.00275704
0.001449	0.00274138
0.00145	0.00273355
0.001451	0.0027218
0.001458	0.00271005
0.00146	0.00270222
0.001464	0.00269438
0.001467	0.00268263
0.001469	0.00267089
0.001471	0.00266305
0.001473	0.00265522
0.001474	0.00264739
0.001485	0.00263564
0.001495	0.00262389
0.001498	0.00261606
0.001501	0.00260823
0.001504	0.00260039
0.001508	0.00259256
0.001513	0.00258473
0.001515	0.0025769
0.001518	0.00256515
0.001525	0.0025534
0.00153	0.00254557
0.001531	0.00253773
0.001532	0.0025299
0.001533	0.00252207
0.001535	0.00251424
0.001538	0.0025064
0.00154	0.00249857
0.001543	0.00248682
0.001547	0.00247507
0.001551	0.00246724
0.001552	0.00245941
0.001558	0.00245158
0.001559	0.00244374
0.00156	0.00243591
0.001565	0.00242808
0.001568	0.00242025
0.001569	0.00241241
0.00157	0.00240458
0.001576	0.00239675
0.001578	0.00238892
0.001582	0.00238108
0.001589	0.00237325
0.001594	0.0023615
0.001595	0.00234975
0.001598	0.002338
0.001603	0.00232626
0.001606	0.00231842
0.001609	0.00231059
0.001614	0.00229884
0.001619	0.00228709
0.00162	0.00227926
0.001626	0.00227143
0.001628	0.0022636
0.00163	0.00225576
0.001639	0.00224793
0.001642	0.0022401
0.001648	0.00223227
0.00165	0.00222443
0.001651	0.0022166
0.001654	0.00220877
0.001664	0.00220094
0.001666	0.0021931
0.001668	0.00218527
0.001672	0.00217352
0.001676	0.00216177
0.00168	0.00215394
0.001682	0.00214611
0.001685	0.00213828
0.001688	0.00213044
0.001691	0.00212261
0.001695	0.00211478
0.001703	0.00210695
0.001704	0.00209911
0.001707	0.00209128
0.00171	0.00207953
0.001713	0.00206778
0.001724	0.00205995
0.001728	0.00205212
0.001729	0.00204429
0.001735	0.00203645
0.001736	0.00202862
0.001737	0.00202079
0.001739	0.00201295
0.001754	0.00200512
0.001757	0.00199729
0.00176	0.00198946
0.001764	0.00198162
0.001767	0.00197379
0.00177	0.00196204
0.001777	0.00195029
0.001782	0.00194246
0.001788	0.00193463
0.001789	0.0019268
0.001792	0.00191113
0.0018	0.00189547
0.001803	0.00188763
0.001805	0.0018798
0.001819	0.00187197
0.00182	0.00186414
0.001821	0.00185239
0.001824	0.00184064
0.00183	0.00183281
0.001835	0.00182106
0.001837	0.00180931
0.001838	0.00180148
0.001845	0.00179364
0.001846	0.0017819
0.001852	0.00176623
0.001856	0.00175448
0.001858	0.00174665
0.001862	0.00173882
0.001865	0.00173098
0.001877	0.00172315
0.001889	0.00171532
0.001901	0.00170749
0.001902	0.00169965
0.001906	0.00169182
0.001907	0.00168399
0.00191	0.00167616
0.001916	0.00166832
0.001942	0.00166049
0.001944	0.00165266
0.001954	0.00164483
0.00196	0.00163308
0.001962	0.00162133
0.001963	0.0016135
0.001964	0.00160566
0.001966	0.00159783
0.001973	0.00159
0.001974	0.00158217
0.001975	0.00157433
0.00198	0.0015665
0.001983	0.00155867
0.001984	0.00155084
0.001988	0.001543
0.001998	0.00153517
0.002022	0.00152734
0.002025	0.00151951
0.002028	0.00150776
0.002041	0.00149601
0.002044	0.00148426
0.002073	0.00147251
0.002074	0.00146468
0.002082	0.00145685
0.002089	0.00144901
0.002097	0.00144118
0.002113	0.00142943
0.002119	0.00141377
0.002122	0.00140202
0.002123	0.00139419
0.002126	0.00138635
0.002127	0.00137852
0.002131	0.00137069
0.002143	0.00136286
0.002157	0.00135502
0.00216	0.00134719
0.002162	0.00133936
0.002166	0.00133153
0.00218	0.00132369
0.002189	0.00131586
0.002219	0.00130803
0.002225	0.0013002
0.002229	0.00128845
0.002233	0.0012767
0.002241	0.00126887
0.002244	0.00126103
0.002258	0.0012532
0.002267	0.00124537
0.002274	0.00123754
0.002283	0.0012297
0.002299	0.00122187
0.002303	0.00121012
0.002315	0.00119837
0.002319	0.00119054
0.002333	0.00118271
0.002337	0.00117488
0.002341	0.00116704
0.00237	0.00115921
0.002377	0.00114746
0.00238	0.0011318
0.002401	0.00112005
0.002406	0.00111222
0.002411	0.00110438
0.002415	0.00109655
0.002425	0.00108872
0.002431	0.00108089
0.002432	0.00107305
0.002438	0.00106522
0.00244	0.00105739
0.002448	0.00104956
0.00248	0.00104172
0.002481	0.00103389
0.002489	0.00102606
0.002494	0.00101823
0.002497	0.00101039
0.00251	0.00100256
0.002529	0.000994729
0.002532	0.000986896
0.002548	0.000979064
0.002551	0.000971231
0.002565	0.000963399
0.00257	0.000955566
0.002574	0.000947734
0.002578	0.000939901
0.002596	0.000932069
0.002597	0.000924236
0.002611	0.000916404
0.002623	0.000908571
0.002632	0.000900739
0.002638	0.000892906
0.002645	0.000885074
0.002667	0.000877241
0.002678	0.000869409
0.002681	0.000861576
0.002689	0.000853744
0.002697	0.000845911
0.00272	0.000838079
0.002756	0.000830246
0.002757	0.000822414
0.002764	0.000814581
0.002776	0.000806748
0.00278	0.000798916
0.002781	0.000791083
0.002782	0.000783251
0.002791	0.000775418
0.002814	0.000767586
0.00282	0.000759753
0.002828	0.000751921
0.00284	0.000744088
0.002854	0.00073234
0.002862	0.000720591
0.002866	0.000712758
0.002881	0.000704926
0.002903	0.000697093
0.002918	0.000689261
0.002921	0.000681428
0.002931	0.000673596
0.002934	0.000665763
0.002946	0.000657931
0.002949	0.000650098
0.002967	0.000642266
0.002971	0.000634433
0.002991	0.000626601
0.003025	0.000618768
0.003036	0.000610936
0.003071	0.000603103
0.003075	0.000595271
0.003091	0.000587438
0.0031	0.000579606
0.003105	0.000571773
0.003106	0.000563941
0.003115	0.000556108
0.003133	0.000548276
0.003171	0.000540443
0.003252	0.000532611
0.003285	0.000524778
0.00329	0.000516946
0.003356	0.000509113
0.003387	0.000501281
0.003427	0.000493448
0.003538	0.000485616
0.003562	0.000477783
0.003588	0.000469951
0.003591	0.000462118
0.003645	0.000454286
0.003647	0.000446453
0.003684	0.000438621
0.003695	0.000430788
0.00371	0.000422956
0.003796	0.000415123
0.003835	0.00040729
0.003848	0.000395542
0.003853	0.000383793
0.003854	0.00037596
0.003888	0.000368128
0.003905	0.000360295
0.003944	0.000352463
0.003954	0.00034463
0.003983	0.000336798
0.003988	0.000328965
0.003997	0.000321133
0.004036	0.0003133
0.004052	0.000305468
0.004134	0.000297635
0.004175	0.000289803
0.004213	0.00028197
0.004227	0.000274138
0.004339	0.000266305
0.004398	0.000258473
0.004409	0.00025064
0.004431	0.000242808
0.004454	0.000234975
0.004542	0.000227143
0.004655	0.00021931
0.004665	0.000211478
0.004684	0.000203645
0.004696	0.000195813
0.004714	0.00018798
0.004806	0.000180148
0.004811	0.000172315
0.004926	0.000164483
0.004971	0.00015665
0.00516699	0.000148818
0.00518699	0.000140985
0.00520599	0.000133153
0.00520699	0.00012532
0.00530099	0.000117488
0.00545299	0.000109655
0.00551799	0.000101823
0.00557199	9.39901e-05
0.00575499	8.61576e-05
0.00647899	7.83251e-05
0.00662999	7.04926e-05
0.00671999	6.26601e-05
0.00730899	5.48276e-05
0.00736199	4.69951e-05
0.00741499	3.91625e-05
0.00787299	3.133e-05
0.00991899	2.34975e-05
0.00993999	1.5665e-05
0.01096	7.83251e-06
0.015848	0

## Sheet: s=-0.05
0	0.994945
9.99999e-07	0.846611
2e-06	0.632251
3e-06	0.522847
4e-06	0.457798
5e-06	0.412537
5.99999e-06	0.379123
6.99999e-06	0.352536
7.99999e-06	0.330968
8.99999e-06	0.312903
9.99999e-06	0.297736
1.1e-05	0.284544
1.2e-05	0.272626
1.3e-05	0.261828
1.4e-05	0.252321
1.5e-05	0.243783
1.6e-05	0.236059
1.7e-05	0.229308
1.8e-05	0.223033
1.9e-05	0.217152
2e-05	0.211759
2.1e-05	0.206787
2.2e-05	0.202053
2.3e-05	0.197474
2.4e-05	0.193197
2.5e-05	0.189274
2.6e-05	0.185668
2.7e-05	0.182256
2.8e-05	0.179199
2.9e-05	0.176292
3e-05	0.173273
3.1e-05	0.170557
3.2e-05	0.168004
3.3e-05	0.165339
3.4e-05	0.162714
3.5e-05	0.160264
3.6e-05	0.157956
3.7e-05	0.155665
3.8e-05	0.153528
3.9e-05	0.151471
4e-05	0.149343
4.1e-05	0.147325
4.2e-05	0.145348
4.3e-05	0.143505
4.4e-05	0.141793
4.5e-05	0.140145
4.6e-05	0.13862
4.7e-05	0.13708
4.8e-05	0.135594
4.9e-05	0.134109
5e-05	0.132616
5.09999e-05	0.131254
5.19999e-05	0.129983
5.29999e-05	0.12868
5.39999e-05	0.127414
5.49999e-05	0.126147
5.59999e-05	0.124943
5.69999e-05	0.123816
5.79999e-05	0.122608
5.89999e-05	0.121425
5.99999e-05	0.12038
6.09999e-05	0.11936
6.19999e-05	0.118323
6.29999e-05	0.117334
6.39999e-05	0.116362
6.49999e-05	0.115401
6.59999e-05	0.114475
6.69999e-05	0.113586
6.79999e-05	0.112716
6.89999e-05	0.11191
6.99999e-05	0.111135
7.09999e-05	0.110238
7.19999e-05	0.109277
7.29999e-05	0.108395
7.39999e-05	0.107617
7.49999e-05	0.106846
7.59999e-05	0.10608
7.69999e-05	0.10527
7.79999e-05	0.104444
7.89999e-05	0.103634
7.99999e-05	0.102843
8.09999e-05	0.102137
8.19999e-05	0.101394
8.29999e-05	0.100667
8.39999e-05	0.100012
8.49999e-05	0.0994043
8.59999e-05	0.0987411
8.69999e-05	0.0981097
8.79999e-05	0.0975656
8.89999e-05	0.0970097
8.99999e-05	0.0964298
9.09999e-05	0.0958262
9.19999e-05	0.0952107
9.29999e-05	0.094611
9.39999e-05	0.0940789
9.49999e-05	0.0935507
9.59999e-05	0.0930027
9.69999e-05	0.0924864
9.79999e-05	0.091994
9.89999e-05	0.0914578
9.99999e-05	0.0909456
0.000101	0.0904452
0.000102	0.0898932
0.000103	0.0894007
0.000104	0.0889123
0.000105	0.0883682
0.000106	0.0878956
0.000107	0.0874628
0.000108	0.087018
0.000109	0.0865812
0.00011	0.0861324
0.000111	0.0856241
0.000112	0.0851118
0.000113	0.0846352
0.000114	0.0841666
0.000115	0.0837497
0.000116	0.0833644
0.000117	0.083011
0.000118	0.0826298
0.000119	0.0822088
0.00012	0.0818236
0.000121	0.0814146
0.000122	0.0810015
0.000123	0.0806322
0.000124	0.0802788
0.000125	0.0799214
0.000126	0.079564
0.000127	0.0791549
0.000128	0.0787101
0.000129	0.0782773
0.00013	0.0778444
0.000131	0.0774751
0.000132	0.0771415
0.000133	0.0767881
0.000134	0.0764187
0.000135	0.0761129
0.000136	0.0758469
0.000137	0.0755609
0.000138	0.0752909
0.000139	0.0750248
0.00014	0.0747389
0.000141	0.074441
0.000142	0.0741472
0.000143	0.0738692
0.000144	0.0736111
0.000145	0.0732934
0.000146	0.0729558
0.000147	0.072646
0.000148	0.0723045
0.000149	0.071955
0.00015	0.0716453
0.000151	0.0713633
0.000152	0.0710973
0.000153	0.0708153
0.000154	0.0705135
0.000155	0.0702395
0.000156	0.0700012
0.000157	0.069751
0.000158	0.0694929
0.000159	0.0692467
0.00016	0.0689607
0.000161	0.0687026
0.000162	0.0684921
0.000163	0.0682538
0.000164	0.0679838
0.000165	0.0677018
0.000166	0.0674397
0.000167	0.0671816
0.000168	0.0669235
0.000169	0.0666852
0.00017	0.0664509
0.000171	0.0661729
0.000172	0.0659187
0.000173	0.0657281
0.000174	0.0655177
0.000175	0.0652635
0.000176	0.0650093
0.000177	0.064783
0.000178	0.0645844
0.000179	0.064358
0.00018	0.0641635
0.000181	0.0639927
0.000182	0.0638021
0.000183	0.0636234
0.000184	0.0634327
0.000185	0.0632421
0.000186	0.0630356
0.000187	0.0628291
0.000188	0.0626067
0.000189	0.0623883
0.00019	0.0621699
0.000191	0.0619237
0.000192	0.0616933
0.000193	0.0614908
0.000194	0.0613081
0.000195	0.0611016
0.000196	0.0608832
0.000197	0.0607045
0.000198	0.0605417
0.000199	0.0603669
0.0002	0.0602121
0.000201	0.0600532
0.000202	0.0598269
0.000203	0.0596243
0.000204	0.0594814
0.000205	0.0592987
0.000206	0.0590683
0.000207	0.0588618
0.000208	0.0586752
0.000209	0.0584687
0.00021	0.058282
0.000211	0.0581391
0.000212	0.0579882
0.000213	0.0578651
0.000214	0.0577618
0.000215	0.0576308
0.000216	0.0575275
0.000217	0.0573885
0.000218	0.0572098
0.000219	0.057039
0.00022	0.0568564
0.000221	0.0567174
0.000222	0.0566062
0.000223	0.0564632
0.000224	0.0562686
0.000225	0.0560701
0.000226	0.0558953
0.000227	0.0557524
0.000228	0.0556253
0.000229	0.0554704
0.00023	0.0552877
0.000231	0.055109
0.000232	0.0549462
0.000233	0.0547476
0.000234	0.0545888
0.000235	0.0544974
0.000236	0.0543862
0.000237	0.0542393
0.000238	0.0540924
0.000239	0.0539137
0.00024	0.0537469
0.000241	0.0536277
0.000242	0.0534848
0.000243	0.0533458
0.000244	0.0532068
0.000245	0.0530519
0.000246	0.0528772
0.000247	0.0526985
0.000248	0.0525356
0.000249	0.0523808
0.00025	0.0522299
0.000251	0.0521028
0.000252	0.0519876
0.000253	0.0518367
0.000254	0.0516937
0.000255	0.0516024
0.000256	0.0514991
0.000257	0.051376
0.000258	0.051245
0.000259	0.0510861
0.00026	0.0509392
0.000261	0.0508002
0.000262	0.0506533
0.000263	0.0505143
0.000264	0.0503554
0.000265	0.0501966
0.000266	0.0500616
0.000267	0.0499345
0.000268	0.0498153
0.000269	0.0496763
0.00027	0.0495294
0.000271	0.0494301
0.000272	0.049311
0.000273	0.0491442
0.000274	0.0490211
0.000275	0.0489297
0.000276	0.0488265
0.000277	0.0487312
0.000278	0.0486081
0.000279	0.0484651
0.00028	0.048342
0.000281	0.0482189
0.000282	0.0480998
0.000283	0.0479687
0.000284	0.0478575
0.000285	0.0477503
0.000286	0.0476153
0.000287	0.0475001
0.000288	0.0473929
0.000289	0.0472579
0.00029	0.0471506
0.000291	0.0470672
0.000292	0.0469441
0.000293	0.046821
0.000294	0.0467217
0.000295	0.0466185
0.000296	0.0465033
0.000297	0.0463842
0.000298	0.0462531
0.000299	0.0461578
0.0003	0.0461062
0.000301	0.0460466
0.000302	0.0459712
0.000303	0.0458679
0.000304	0.0457647
0.000305	0.0456892
0.000306	0.0456018
0.000307	0.0454787
0.000308	0.0453397
0.000309	0.0452047
0.00031	0.0450776
0.000311	0.0449625
0.000312	0.0448513
0.000313	0.044752
0.000314	0.0446765
0.000315	0.0445653
0.000316	0.0444343
0.000317	0.0443152
0.000318	0.0442
0.000319	0.0440809
0.00032	0.0439498
0.000321	0.0438426
0.000322	0.0437512
0.000323	0.0436559
0.000324	0.0435646
0.000325	0.0434733
0.000326	0.0433779
0.000327	0.0433065
0.000328	0.0432469
0.000329	0.0431794
0.00033	0.0430682
0.000331	0.0429649
0.000332	0.0428855
0.000333	0.0427942
0.000334	0.0426989
0.000335	0.0425956
0.000336	0.0425043
0.000337	0.042409
0.000338	0.0423335
0.000339	0.0422859
0.00034	0.0422183
0.000341	0.0421389
0.000342	0.0420793
0.000343	0.0420317
0.000344	0.0419443
0.000345	0.041849
0.000346	0.0417815
0.000347	0.0417021
0.000348	0.0416147
0.000349	0.0415234
0.00035	0.0413923
0.000351	0.0412494
0.000352	0.041154
0.000353	0.0410667
0.000354	0.0409793
0.000355	0.04088
0.000356	0.0407768
0.000357	0.0406974
0.000358	0.0406219
0.000359	0.0405464
0.00036	0.040471
0.000361	0.0403876
0.000362	0.0403002
0.000363	0.0402089
0.000364	0.0401255
0.000365	0.0400739
0.000366	0.0400262
0.000367	0.0399587
0.000368	0.0398832
0.000369	0.0397879
0.00037	0.0396847
0.000371	0.0395854
0.000372	0.039498
0.000373	0.0394146
0.000374	0.0393312
0.000375	0.0392756
0.000376	0.0392161
0.000377	0.0391367
0.000378	0.0390374
0.000379	0.038946
0.00038	0.0389023
0.000381	0.0388587
0.000382	0.0387951
0.000383	0.0387316
0.000384	0.0386601
0.000385	0.0385568
0.000386	0.0384496
0.000387	0.0383821
0.000388	0.0383027
0.000389	0.0381955
0.00039	0.0381081
0.000391	0.0380207
0.000392	0.0379413
0.000393	0.0378936
0.000394	0.0378261
0.000395	0.0377666
0.000396	0.0377149
0.000397	0.0376435
0.000398	0.0375799
0.000399	0.0375204
0.0004	0.0374648
0.000401	0.0373972
0.000402	0.0373297
0.000403	0.0372781
0.000404	0.0371987
0.000405	0.0370835
0.000406	0.0369961
0.000407	0.0369286
0.000408	0.0368611
0.000409	0.0368095
0.00041	0.036738
0.000411	0.0366546
0.000412	0.036607
0.000413	0.0365633
0.000414	0.0364918
0.000415	0.0364124
0.000416	0.0363369
0.000417	0.0362575
0.000418	0.036186
0.000419	0.0361423
0.00042	0.0361026
0.000421	0.0360351
0.000422	0.0359557
0.000423	0.0359001
0.000424	0.0358365
0.000425	0.0357651
0.000426	0.0357015
0.000427	0.035642
0.000428	0.0355983
0.000429	0.0355506
0.00043	0.035495
0.000431	0.0354275
0.000432	0.0353521
0.000433	0.0352845
0.000434	0.0352369
0.000435	0.0351813
0.000436	0.0351177
0.000437	0.0350582
0.000438	0.0349907
0.000439	0.0349232
0.00044	0.0348477
0.000441	0.0347802
0.000442	0.0347405
0.000443	0.0346928
0.000444	0.0346174
0.000445	0.0345618
0.000446	0.03453
0.000447	0.0344823
0.000448	0.0344307
0.000449	0.034391
0.00045	0.0343394
0.000451	0.03426
0.000452	0.0341686
0.000453	0.0340892
0.000454	0.0340257
0.000455	0.0339701
0.000456	0.0339065
0.000457	0.033843
0.000458	0.0337874
0.000459	0.0337119
0.00046	0.0336246
0.000461	0.0335531
0.000462	0.0334856
0.000463	0.033422
0.000464	0.0333744
0.000465	0.0333386
0.000466	0.0333029
0.000467	0.0332592
0.000468	0.0331996
0.000469	0.033148
0.00047	0.0331043
0.000471	0.0330448
0.000472	0.0329812
0.000473	0.0329375
0.000474	0.0328978
0.000475	0.0328383
0.000476	0.0327866
0.000477	0.0327549
0.000478	0.0327271
0.000479	0.0326873
0.00048	0.0326437
0.000481	0.032596
0.000482	0.0325603
0.000483	0.0325245
0.000484	0.032461
0.000485	0.0324054
0.000486	0.0323696
0.000487	0.0323339
0.000488	0.0322862
0.000489	0.0322307
0.00049	0.0321671
0.000491	0.0320956
0.000492	0.0320281
0.000493	0.0319844
0.000494	0.0319606
0.000495	0.0319288
0.000496	0.0318812
0.000497	0.0318296
0.000498	0.031774
0.000499	0.0317223
0.0005	0.0316866
0.000500999	0.0316469
0.000501999	0.0316032
0.000502999	0.0315555
0.000503999	0.0315158
0.000504999	0.031492
0.000505999	0.0314563
0.000506999	0.0314245
0.000507999	0.0313967
0.000508999	0.031357
0.000509999	0.0313252
0.000510999	0.0313014
0.000511999	0.0312577
0.000512999	0.0311981
0.000513999	0.0311505
0.000514999	0.0311108
0.000515999	0.031079
0.000516999	0.0310552
0.000517999	0.0310194
0.000518999	0.0309876
0.000519999	0.0309678
0.000520999	0.030936
0.000521999	0.0308804
0.000522999	0.0308089
0.000523999	0.0307494
0.000524999	0.0307057
0.000525999	0.0306461
0.000526999	0.0305866
0.000527999	0.0305429
0.000528999	0.0304873
0.000529999	0.0304118
0.000530999	0.0303562
0.000531999	0.0303324
0.000532999	0.0303086
0.000533999	0.0302847
0.000534999	0.030245
0.000535999	0.0302093
0.000536999	0.0301894
0.000537999	0.0301497
0.000538999	0.03011
0.000539999	0.0300425
0.000540999	0.029975
0.000541999	0.0299392
0.000542999	0.0298876
0.000543999	0.02984
0.000544999	0.0297963
0.000545999	0.0297526
0.000546999	0.029701
0.000547999	0.0296493
0.000548999	0.0296176
0.000549999	0.0295898
0.000550999	0.0295421
0.000551999	0.0295024
0.000552999	0.0294825
0.000553999	0.0294508
0.000554999	0.0294031
0.000555999	0.0293594
0.000556999	0.0293237
0.000557999	0.0292999
0.000558999	0.02928
0.000559999	0.0292324
0.000560999	0.0291966
0.000561999	0.0291648
0.000562999	0.0291291
0.000563999	0.0291092
0.000564999	0.0290497
0.000565999	0.0289742
0.000566999	0.0289385
0.000567999	0.0289147
0.000568999	0.0288789
0.000569999	0.0288392
0.000570999	0.0288035
0.000571999	0.0287638
0.000572999	0.028728
0.000573999	0.0286962
0.000574999	0.0286526
0.000575999	0.0286128
0.000576999	0.0285771
0.000577999	0.0285533
0.000578999	0.0285294
0.000579999	0.0285056
0.000580999	0.0284858
0.000581999	0.0284461
0.000582999	0.0283984
0.000583999	0.0283428
0.000584999	0.0283031
0.000585999	0.0282832
0.000586999	0.0282475
0.000587999	0.0282038
0.000588999	0.028176
0.000589999	0.0281482
0.000590999	0.0281164
0.000591999	0.0280966
0.000592999	0.0280529
0.000593999	0.0280052
0.000594999	0.0279735
0.000595999	0.0279338
0.000596999	0.027894
0.000597999	0.0278345
0.000598999	0.0277789
0.000599999	0.0277392
0.000600999	0.0276756
0.000601999	0.02762
0.000602999	0.0275803
0.000603999	0.0275247
0.000604999	0.027485
0.000605999	0.0274612
0.000606999	0.0274254
0.000607999	0.0273818
0.000608999	0.0273381
0.000609999	0.0272944
0.000610999	0.0272507
0.000611999	0.0272189
0.000612999	0.0271911
0.000613999	0.0271554
0.000614999	0.0271117
0.000615999	0.027072
0.000616999	0.0270442
0.000617999	0.0270204
0.000618999	0.0269846
0.000619999	0.0269449
0.000620999	0.0269171
0.000621999	0.0268734
0.000622999	0.0268337
0.000623999	0.026798
0.000624999	0.0267583
0.000625999	0.0267305
0.000626999	0.0266987
0.000627999	0.0266709
0.000628999	0.026651
0.000629999	0.0266352
0.000630999	0.0266193
0.000631999	0.0265716
0.000632999	0.0265081
0.000633999	0.0264803
0.000634999	0.0264644
0.000635999	0.0264445
0.000636999	0.0264247
0.000637999	0.0264088
0.000638999	0.0263731
0.000639999	0.0263175
0.000640999	0.0262698
0.000642999	0.0262222
0.000643999	0.0261745
0.000644999	0.0261427
0.000645999	0.0261229
0.000646999	0.026099
0.000647999	0.0260712
0.000648999	0.0260474
0.000649999	0.0260196
0.000650999	0.0259799
0.000651999	0.0259402
0.000652999	0.0259045
0.000653999	0.0258727
0.000654999	0.0258211
0.000655999	0.0257655
0.000657999	0.0257297
0.000658999	0.025686
0.000659999	0.0256543
0.000660999	0.0256423
0.000661999	0.0256106
0.000662999	0.0255748
0.000663999	0.0255312
0.000664999	0.0254914
0.000665999	0.0254716
0.000666999	0.0254478
0.000667999	0.0254279
0.000668999	0.0254001
0.000669999	0.0253445
0.000670999	0.0252929
0.000671999	0.0252611
0.000672999	0.0252293
0.000673999	0.0251896
0.000674999	0.025138
0.000675999	0.0251023
0.000676999	0.0250864
0.000678999	0.0250665
0.000679999	0.0250347
0.000680999	0.024999
0.000681999	0.0249672
0.000682999	0.0249394
0.000683999	0.0249196
0.000684999	0.0248918
0.000685999	0.02486
0.000686999	0.0248362
0.000687999	0.0248124
0.000688999	0.0247925
0.000689999	0.0247766
0.000690999	0.0247568
0.000691999	0.024725
0.000692999	0.0246853
0.000694999	0.0246416
0.000695999	0.0245939
0.000696999	0.0245582
0.000697999	0.0245383
0.000698999	0.0245145
0.000699999	0.0244947
0.000700999	0.0244827
0.000701999	0.024443
0.000702999	0.0243993
0.000703999	0.0243596
0.000704999	0.0243199
0.000705999	0.0242842
0.000706999	0.0242484
0.000707999	0.0242087
0.000708999	0.024173
0.000709999	0.0241412
0.000710999	0.0240975
0.000711999	0.0240539
0.000712999	0.0240261
0.000714999	0.0240181
0.000715999	0.0240022
0.000716999	0.0239744
0.000717999	0.0239506
0.000718999	0.0239268
0.000720999	0.0239029
0.000722999	0.0238831
0.000723999	0.0238672
0.000724999	0.0238473
0.000725999	0.0238156
0.000726999	0.0237878
0.000727999	0.0237639
0.000728999	0.0237322
0.000729999	0.0237044
0.000730999	0.0236845
0.000731999	0.0236528
0.000732999	0.023621
0.000733999	0.0236051
0.000734999	0.0235892
0.000735999	0.0235694
0.000736999	0.0235535
0.000737999	0.0235376
0.000738999	0.0235058
0.000739999	0.0234661
0.000740999	0.0234383
0.000741999	0.0234145
0.000742999	0.0233986
0.000743999	0.0233867
0.000744999	0.0233629
0.000745999	0.0233311
0.000746999	0.0233033
0.000747999	0.0232834
0.000748999	0.0232636
0.000749999	0.0232119
0.000750999	0.0231563
0.000751999	0.0231325
0.000752999	0.0231087
0.000753999	0.0230809
0.000754999	0.0230531
0.000755999	0.0230213
0.000756999	0.0229935
0.000757999	0.0229737
0.000758999	0.0229578
0.000759999	0.0229379
0.000760999	0.0229022
0.000761999	0.0228585
0.000762999	0.0228228
0.000763999	0.0227989
0.000764999	0.022787
0.000765999	0.0227632
0.000766999	0.0227394
0.000767999	0.0227235
0.000768999	0.0226997
0.000769999	0.0226838
0.000770999	0.0226679
0.000771999	0.0226401
0.000773999	0.0226202
0.000774999	0.0225885
0.000775999	0.0225527
0.000776999	0.0225368
0.000777999	0.022513
0.000778999	0.0224812
0.000779999	0.0224376
0.000780999	0.0224018
0.000781999	0.0223859
0.000782999	0.0223581
0.000783999	0.0223343
0.000784999	0.0223224
0.000785999	0.0223025
0.000786999	0.0222866
0.000787999	0.0222668
0.000788999	0.0222469
0.000789999	0.022239
0.000790999	0.0222271
0.000791999	0.0222072
0.000792999	0.0221715
0.000793999	0.0221357
0.000794999	0.0221079
0.000795999	0.0220762
0.000796999	0.0220523
0.000797999	0.0220325
0.000798999	0.0220087
0.000799999	0.0219769
0.000800999	0.0219491
0.000801999	0.0219253
0.000802999	0.0219014
0.000803999	0.0218855
0.000804999	0.0218736
0.000805999	0.0218577
0.000806999	0.0218419
0.000807999	0.0218339
0.000808999	0.021822
0.000809999	0.0218022
0.000810999	0.0217863
0.000811999	0.0217704
0.000812999	0.0217545
0.000813999	0.0217466
0.000814999	0.0217267
0.000815999	0.0217029
0.000817999	0.021687
0.000818999	0.0216711
0.000819999	0.0216433
0.000820999	0.0216076
0.000821999	0.0215678
0.000822999	0.0215281
0.000823999	0.0215003
0.000824999	0.0214805
0.000825999	0.0214606
0.000826999	0.0214328
0.000827999	0.021409
0.000828999	0.0213891
0.000829999	0.0213613
0.000831999	0.0213335
0.000832999	0.0213097
0.000833999	0.0212899
0.000834999	0.021266
0.000835999	0.0212303
0.000836999	0.0211985
0.000837999	0.0211747
0.000838999	0.021139
0.000840999	0.0211032
0.000841999	0.0210834
0.000842999	0.0210635
0.000843999	0.0210436
0.000844999	0.0210238
0.000845999	0.0210039
0.000846999	0.0209841
0.000847999	0.0209642
0.000848999	0.0209483
0.000849999	0.0209285
0.000850999	0.0209007
0.000851999	0.0208769
0.000852999	0.020861
0.000853999	0.0208451
0.000854999	0.0208252
0.000855999	0.0207974
0.000857999	0.0207776
0.000858999	0.0207696
0.000859999	0.0207617
0.000861999	0.0207458
0.000862999	0.0207299
0.000863999	0.020718
0.000864999	0.0207061
0.000865999	0.0206981
0.000866999	0.0206783
0.000867999	0.0206465
0.000868999	0.0206187
0.000869999	0.0205949
0.000870999	0.020579
0.000871999	0.0205592
0.000873999	0.0205194
0.000875999	0.0204916
0.000876999	0.0204837
0.000878999	0.0204678
0.000879999	0.0204321
0.000881999	0.0204003
0.000883999	0.0203844
0.000885999	0.0203566
0.000886999	0.0203209
0.000887999	0.0202931
0.000888999	0.0202693
0.000889999	0.0202494
0.000890999	0.0202375
0.000891999	0.0202295
0.000892999	0.0202137
0.000893999	0.0201978
0.000894999	0.0201819
0.000895999	0.020166
0.000896999	0.0201581
0.000897999	0.0201501
0.000898999	0.0201382
0.000899999	0.0201183
0.000900999	0.0200985
0.000901999	0.0200866
0.000903999	0.0200707
0.000904999	0.0200508
0.000905999	0.0200349
0.000906999	0.020023
0.000907999	0.0200071
0.000908999	0.0199793
0.000909999	0.0199436
0.000910999	0.0199158
0.000911999	0.0199039
0.000912999	0.019884
0.000913999	0.0198602
0.000914999	0.0198483
0.000915999	0.0198245
0.000916999	0.0197927
0.000917999	0.0197728
0.000918999	0.019757
0.000920999	0.0197411
0.000921999	0.0197133
0.000922999	0.0196855
0.000925999	0.0196616
0.000926999	0.0196418
0.000927999	0.0196339
0.000928999	0.01961
0.000929999	0.0195703
0.000930999	0.0195266
0.000931999	0.0194949
0.000932999	0.019479
0.000933999	0.0194631
0.000934999	0.0194432
0.000935999	0.0194115
0.000936999	0.0193876
0.000937999	0.0193797
0.000938999	0.0193638
0.000939999	0.0193439
0.000940999	0.0193201
0.000941999	0.0192963
0.000942999	0.0192844
0.000943999	0.0192685
0.000944999	0.0192486
0.000945999	0.0192328
0.000946999	0.0192089
0.000947999	0.0191851
0.000948999	0.0191732
0.000949999	0.0191454
0.000950999	0.0191017
0.000951999	0.0190739
0.000952999	0.019058
0.000953999	0.0190421
0.000954999	0.0190302
0.000955999	0.0190104
0.000956999	0.0189786
0.000957999	0.0189587
0.000958999	0.0189429
0.000959999	0.018927
0.000960999	0.0189111
0.000961999	0.0188912
0.000962999	0.0188753
0.000963999	0.0188595
0.000964999	0.0188356
0.000965999	0.0188158
0.000966999	0.0187999
0.000967999	0.018784
0.000968999	0.0187761
0.000970999	0.0187602
0.000972999	0.0187324
0.000973999	0.0187006
0.000974999	0.0186728
0.000975999	0.0186569
0.000976999	0.018649
0.000977999	0.0186371
0.000978999	0.0186212
0.000979999	0.0186093
0.000980999	0.0185934
0.000981999	0.0185696
0.000982999	0.0185418
0.000985999	0.0185219
0.000986999	0.018514
0.000987999	0.018506
0.000988999	0.0184941
0.000989999	0.0184742
0.000990999	0.0184544
0.000991999	0.0184345
0.000992999	0.0184107
0.000993999	0.0183948
0.000994999	0.0183869
0.000995999	0.0183789
0.000996999	0.018367
0.000998999	0.0183551
0.000999999	0.0183432
0.001001	0.0183313
0.001002	0.0183194
0.001003	0.0183035
0.001004	0.0182797
0.001006	0.0182519
0.001007	0.0182241
0.001008	0.0181963
0.001009	0.0181764
0.00101	0.0181645
0.001011	0.0181486
0.001012	0.0181248
0.001013	0.0181089
0.001014	0.018093
0.001015	0.0180771
0.001016	0.0180692
0.001017	0.0180573
0.001018	0.0180414
0.001019	0.0180255
0.00102	0.0180056
0.001021	0.0179818
0.001022	0.0179659
0.001023	0.017958
0.001024	0.0179461
0.001025	0.0179302
0.001026	0.0179103
0.001027	0.0178905
0.001028	0.0178786
0.001029	0.0178627
0.00103	0.0178388
0.001031	0.017823
0.001032	0.017815
0.001033	0.0178071
0.001034	0.0177952
0.001035	0.0177793
0.001036	0.0177674
0.001037	0.0177555
0.001038	0.0177435
0.001039	0.0177316
0.00104	0.0177157
0.001043	0.0176999
0.001044	0.01768
0.001045	0.0176522
0.001046	0.0176244
0.001047	0.0176085
0.001048	0.0175966
0.001049	0.0175807
0.00105	0.0175609
0.001051	0.017545
0.001052	0.0175291
0.001053	0.0175053
0.001054	0.0174814
0.001055	0.0174576
0.001056	0.0174378
0.001058	0.0174258
0.001059	0.01741
0.00106	0.0173941
0.001062	0.0173861
0.001063	0.0173583
0.001064	0.0173305
0.001065	0.0173146
0.001067	0.0172908
0.001068	0.0172749
0.001069	0.017263
0.001071	0.0172511
0.001072	0.0172352
0.001073	0.0172154
0.001074	0.0171995
0.001075	0.0171836
0.001076	0.0171677
0.001077	0.0171518
0.001078	0.0171399
0.001079	0.0171121
0.001081	0.0170843
0.001083	0.0170645
0.001085	0.0170287
0.001086	0.0170009
0.001088	0.016989
0.001089	0.0169731
0.00109	0.0169572
0.001091	0.0169493
0.001092	0.0169374
0.001093	0.0169135
0.001094	0.0168937
0.001095	0.0168857
0.001096	0.0168699
0.001097	0.016854
0.001098	0.016846
0.001099	0.0168381
0.0011	0.0168301
0.001101	0.0168222
0.001103	0.0168143
0.001104	0.0168063
0.001108	0.0167984
0.001109	0.0167865
0.00111	0.0167746
0.001111	0.0167547
0.001112	0.0167309
0.001114	0.016719
0.001115	0.016711
0.001116	0.0167031
0.001117	0.0166912
0.001118	0.0166753
0.001119	0.0166554
0.00112	0.0166316
0.001121	0.0166117
0.001122	0.0165958
0.001123	0.016576
0.001124	0.0165601
0.001125	0.0165482
0.001126	0.0165363
0.001127	0.0165204
0.001128	0.0165045
0.001129	0.0164886
0.00113	0.0164727
0.001131	0.0164648
0.001132	0.0164529
0.001134	0.016433
0.001135	0.0164171
0.001136	0.0164092
0.001138	0.0163893
0.001139	0.0163615
0.001141	0.0163457
0.001142	0.0163337
0.001143	0.0163218
0.001144	0.0163139
0.001146	0.0163059
0.001148	0.016298
0.001149	0.0162781
0.00115	0.0162543
0.001151	0.0162345
0.001152	0.0162146
0.001153	0.0162027
0.001154	0.0161948
0.001157	0.0161868
0.00116	0.016167
0.001163	0.0161392
0.001164	0.0161233
0.001165	0.0161153
0.001168	0.0160955
0.001169	0.0160716
0.00117	0.0160558
0.001171	0.0160438
0.001174	0.016028
0.001175	0.0160121
0.001176	0.0159882
0.001177	0.0159565
0.001178	0.0159406
0.001179	0.0159326
0.001181	0.0159207
0.001182	0.0159048
0.001183	0.015889
0.001184	0.0158771
0.001185	0.0158651
0.001186	0.0158453
0.001187	0.0158095
0.001188	0.0157817
0.00119	0.0157738
0.001192	0.0157659
0.001193	0.0157539
0.001195	0.0157341
0.001199	0.0157142
0.0012	0.0157023
0.001201	0.0156904
0.001202	0.0156785
0.001205	0.0156705
0.001206	0.0156626
0.001207	0.0156467
0.001209	0.0156308
0.00121	0.0156229
0.001211	0.0156149
0.001212	0.015607
0.001213	0.0155911
0.001214	0.0155752
0.001215	0.0155633
0.001216	0.0155474
0.001217	0.0155316
0.001218	0.0155157
0.001219	0.0154998
0.00122	0.0154799
0.001221	0.0154601
0.001222	0.0154442
0.001223	0.0154243
0.001224	0.0154084
0.001225	0.0154005
0.001226	0.0153886
0.001227	0.0153727
0.001228	0.0153608
0.001229	0.0153489
0.00123	0.015333
0.001231	0.0153211
0.001232	0.0153092
0.001233	0.0152893
0.001234	0.0152734
0.001235	0.0152615
0.001236	0.0152456
0.001237	0.0152218
0.001238	0.0152019
0.001239	0.0151821
0.00124	0.0151622
0.001241	0.0151543
0.001242	0.0151463
0.001243	0.0151384
0.001245	0.0151265
0.001247	0.0151066
0.001252	0.0150907
0.001253	0.0150828
0.001254	0.0150749
0.001255	0.0150629
0.001257	0.015051
0.001258	0.0150351
0.001259	0.0150153
0.00126	0.0149994
0.001261	0.0149756
0.001262	0.0149557
0.001263	0.0149478
0.001265	0.0149398
0.001266	0.0149279
0.001267	0.014916
0.001268	0.0149041
0.001269	0.0148922
0.00127	0.0148723
0.001271	0.0148525
0.001273	0.0148406
0.001274	0.0148247
0.001275	0.0148088
0.001276	0.0147969
0.001279	0.0147889
0.00128	0.0147691
0.001281	0.0147492
0.001282	0.0147413
0.001283	0.0147254
0.001284	0.0147095
0.001285	0.0146976
0.001286	0.0146857
0.001287	0.0146738
0.001289	0.0146618
0.001291	0.0146499
0.001292	0.014638
0.001293	0.0146221
0.001294	0.0146023
0.001295	0.0145824
0.001296	0.0145665
0.001297	0.0145546
0.001298	0.0145348
0.001299	0.0145189
0.0013	0.0145109
0.001301	0.0144951
0.001303	0.0144792
0.001304	0.0144712
0.001305	0.0144633
0.001306	0.0144553
0.001307	0.0144434
0.001309	0.0144315
0.001311	0.0144196
0.001312	0.0144077
0.001313	0.0143997
0.001314	0.0143918
0.001317	0.0143759
0.001318	0.01436
0.001319	0.0143481
0.00132	0.0143362
0.001321	0.0143163
0.001322	0.0142925
0.001325	0.0142806
0.001326	0.0142687
0.001327	0.0142568
0.001328	0.0142488
0.001331	0.0142409
0.001334	0.014233
0.001335	0.014221
0.001336	0.0142052
0.001337	0.0141932
0.001339	0.0141813
0.001341	0.0141654
0.001342	0.0141496
0.001344	0.0141376
0.001347	0.0141297
0.001349	0.0141138
0.00135	0.0140979
0.001351	0.014082
0.001352	0.0140662
0.001353	0.0140503
0.001354	0.0140304
0.001355	0.0140185
0.001357	0.0140106
0.001358	0.0139986
0.001359	0.0139867
0.00136	0.0139788
0.001361	0.0139709
0.001362	0.0139629
0.001363	0.013955
0.001364	0.013947
0.001365	0.0139272
0.001366	0.0138994
0.001367	0.0138835
0.001368	0.0138755
0.001369	0.0138597
0.00137	0.0138438
0.001371	0.0138319
0.001374	0.013816
0.001375	0.0138001
0.001377	0.0137842
0.001378	0.0137643
0.001379	0.0137445
0.001381	0.0137286
0.001382	0.0137127
0.001383	0.0136968
0.001384	0.0136809
0.001385	0.013669
0.001386	0.0136611
0.001388	0.0136492
0.001389	0.0136373
0.00139	0.0136293
0.001391	0.0136214
0.001393	0.0136095
0.001396	0.0135976
0.001399	0.0135856
0.0014	0.0135698
0.001401	0.0135578
0.001404	0.0135459
0.001405	0.0135261
0.001407	0.0135102
0.001408	0.0134983
0.00141	0.0134824
0.001412	0.0134705
0.001413	0.0134625
0.001415	0.0134466
0.001416	0.0134308
0.001417	0.0134228
0.001418	0.0134149
0.001419	0.013403
0.00142	0.0133871
0.001421	0.0133712
0.001422	0.0133593
0.001424	0.0133513
0.001425	0.0133355
0.001426	0.0133156
0.00143	0.0132957
0.001431	0.0132799
0.001432	0.0132679
0.001433	0.013256
0.001434	0.0132401
0.001435	0.0132203
0.001436	0.0132084
0.001439	0.0131885
0.001441	0.0131687
0.001443	0.0131567
0.001445	0.0131448
0.001447	0.0131329
0.001449	0.013117
0.00145	0.0131051
0.001451	0.0130972
0.001452	0.0130892
0.001453	0.0130813
0.001455	0.0130654
0.001456	0.0130456
0.001457	0.0130336
0.001459	0.0130178
0.00146	0.0130019
0.001461	0.01299
0.001462	0.0129741
0.001463	0.0129542
0.001466	0.0129344
0.001468	0.0129185
0.001469	0.0129026
0.00147	0.0128827
0.001471	0.0128668
0.001473	0.0128589
0.001474	0.012843
0.001475	0.0128271
0.001476	0.0128192
0.001479	0.0128112
0.00148	0.0128033
0.001482	0.0127874
0.001483	0.0127676
0.001484	0.0127437
0.001485	0.0127239
0.001489	0.0127159
0.001491	0.012708
0.001495	0.0127001
0.001496	0.0126921
0.001497	0.0126842
0.001499	0.0126762
0.0015	0.0126683
0.001503	0.0126603
0.001504	0.0126445
0.001508	0.0126286
0.001509	0.0126206
0.001511	0.0126127
0.001512	0.0126047
0.001515	0.0125968
0.001516	0.0125889
0.001517	0.0125809
0.001518	0.012565
0.001519	0.0125491
0.001521	0.0125412
0.001523	0.0125333
0.001524	0.0125213
0.001525	0.0125094
0.001526	0.0125015
0.001527	0.0124935
0.001528	0.0124856
0.001529	0.0124777
0.00153	0.0124618
0.001531	0.0124419
0.001533	0.012426
0.001535	0.0124062
0.001537	0.0123903
0.001539	0.0123784
0.00154	0.0123665
0.001542	0.0123585
0.001543	0.0123466
0.001546	0.0123307
0.001547	0.0123188
0.001549	0.0123109
0.00155	0.0123029
0.001551	0.012295
0.001552	0.012287
0.001554	0.0122791
0.001555	0.0122672
0.001561	0.0122553
0.001564	0.0122473
0.001565	0.0122394
0.001571	0.0122314
0.001573	0.0122235
0.001578	0.0122156
0.001579	0.0121997
0.00158	0.0121798
0.001581	0.0121679
0.001582	0.01216
0.001583	0.0121361
0.001586	0.0121123
0.001587	0.0121044
0.001588	0.0120964
0.001589	0.0120845
0.00159	0.0120726
0.001591	0.0120647
0.001592	0.0120488
0.001594	0.0120249
0.001596	0.0120051
0.001598	0.0119932
0.001599	0.0119852
0.0016	0.0119693
0.001602	0.0119495
0.001605	0.0119376
0.001606	0.0119296
0.001607	0.0119217
0.001608	0.0119098
0.00161	0.0118899
0.001612	0.011874
0.001614	0.0118661
0.001615	0.0118502
0.001616	0.0118343
0.001618	0.0118224
0.001619	0.0118105
0.00162	0.0118025
0.001621	0.0117946
0.001622	0.0117827
0.001623	0.0117708
0.001627	0.0117628
0.001629	0.0117549
0.001634	0.011747
0.001635	0.011739
0.001636	0.0117311
0.001637	0.0117231
0.001639	0.0117112
0.00164	0.0116993
0.001641	0.0116914
0.001643	0.0116834
0.001644	0.0116715
0.001645	0.0116596
0.001646	0.0116437
0.001648	0.0116199
0.001649	0.011604
0.00165	0.0115921
0.001651	0.0115762
0.001652	0.0115603
0.001653	0.0115444
0.001654	0.0115285
0.001655	0.0115166
0.001656	0.0115087
0.001657	0.0114968
0.001658	0.0114769
0.001659	0.011461
0.00166	0.0114491
0.001662	0.0114332
0.001664	0.0114213
0.001665	0.0114134
0.001668	0.0114054
0.001669	0.0113975
0.00167	0.0113895
0.001673	0.0113776
0.001678	0.0113657
0.001679	0.0113578
0.00168	0.0113459
0.001683	0.0113339
0.001685	0.011326
0.001686	0.0113181
0.00169	0.0113101
0.001692	0.0113022
0.001694	0.0112942
0.001696	0.0112783
0.001697	0.0112625
0.001698	0.0112505
0.001699	0.0112386
0.0017	0.0112267
0.001701	0.0112108
0.001702	0.0111989
0.001704	0.011187
0.001706	0.0111751
0.001707	0.0111671
0.001708	0.0111592
0.001713	0.0111513
0.001714	0.0111433
0.001715	0.0111354
0.001716	0.0111274
0.001717	0.0111155
0.001718	0.0110957
0.001719	0.0110679
0.00172	0.011048
0.001721	0.0110401
0.001723	0.0110242
0.001725	0.0110004
0.001726	0.0109845
0.001729	0.0109765
0.00173	0.0109686
0.001735	0.0109527
0.001737	0.0109289
0.001738	0.010913
0.001739	0.0109011
0.001741	0.0108892
0.001743	0.0108772
0.001744	0.0108614
0.001745	0.0108494
0.001747	0.0108375
0.00175	0.0108256
0.001751	0.0108177
0.001753	0.0108097
0.001755	0.0108018
0.001758	0.0107939
0.001759	0.0107859
0.001761	0.010778
0.001762	0.0107661
0.001764	0.0107541
0.001769	0.0107462
0.001772	0.0107383
0.001774	0.0107303
0.001776	0.0107224
0.001777	0.0107105
0.001778	0.0106985
0.001779	0.0106906
0.001781	0.0106827
0.001782	0.0106747
0.001783	0.0106668
0.001785	0.0106588
0.001787	0.0106469
0.001788	0.010635
0.00179	0.0106271
0.001791	0.0106191
0.001792	0.0106072
0.001794	0.0105913
0.001795	0.0105794
0.001796	0.0105675
0.0018	0.0105556
0.001802	0.0105397
0.001803	0.0105198
0.001805	0.0105079
0.001807	0.0105
0.001808	0.010492
0.00181	0.0104841
0.001812	0.0104762
0.001814	0.0104642
0.001818	0.0104444
0.001821	0.0104285
0.001824	0.0104206
0.001827	0.0104126
0.001828	0.0104047
0.001829	0.0103928
0.00183	0.0103769
0.001832	0.010365
0.001835	0.010357
0.001839	0.0103491
0.001843	0.0103411
0.001846	0.0103332
0.001847	0.0103252
0.001848	0.0103094
0.001852	0.0102935
0.001854	0.0102855
0.001856	0.0102736
0.001857	0.0102577
0.001858	0.0102458
0.001859	0.0102379
0.00186	0.0102299
0.001861	0.010218
0.001864	0.0102021
0.001865	0.0101902
0.001866	0.0101823
0.001867	0.0101743
0.001868	0.0101664
0.00187	0.0101585
0.001871	0.0101505
0.001874	0.0101426
0.001876	0.0101307
0.001878	0.0101187
0.001879	0.0101108
0.001885	0.0100989
0.001886	0.010083
0.001888	0.0100711
0.00189	0.0100631
0.001893	0.0100552
0.001894	0.0100473
0.001895	0.0100393
0.001896	0.0100314
0.001901	0.0100234
0.001902	0.0100155
0.001903	0.0100036
0.001904	0.00998769
0.001905	0.00997578
0.001907	0.00996783
0.001908	0.00995989
0.001909	0.00995195
0.001912	0.00994401
0.001913	0.00993606
0.001917	0.00991621
0.001918	0.00989635
0.001919	0.00988047
0.001922	0.00986458
0.001923	0.00985267
0.001929	0.00984075
0.001933	0.00983281
0.001935	0.00982487
0.001936	0.00981693
0.001937	0.00980898
0.001938	0.00980104
0.001939	0.00978913
0.001942	0.00977721
0.001944	0.0097653
0.001948	0.00975339
0.001955	0.0097375
0.001957	0.00972162
0.001959	0.00971367
0.00196	0.00970573
0.001961	0.00969382
0.001965	0.0096819
0.001966	0.00967396
0.001968	0.00966602
0.001969	0.0096541
0.001971	0.00964219
0.001973	0.00963425
0.001975	0.00962631
0.001976	0.00961439
0.00198	0.00960248
0.001983	0.00959454
0.001988	0.00958262
0.001989	0.00957071
0.001991	0.00955879
0.001993	0.00954291
0.001994	0.009531
0.001998	0.00952305
0.001999	0.00951511
0.002005	0.00950717
0.002011	0.00949923
0.002012	0.00949128
0.002014	0.00947937
0.002016	0.00946746
0.002017	0.00945951
0.002019	0.00945157
0.00202	0.00944363
0.002022	0.00943569
0.002024	0.00942774
0.002026	0.0094198
0.002028	0.00941186
0.00203	0.00940392
0.002031	0.009392
0.002041	0.00938009
0.002043	0.00937215
0.002047	0.0093642
0.002048	0.00935626
0.002051	0.00934832
0.002055	0.0093364
0.002056	0.00932052
0.002057	0.00930861
0.002058	0.00930066
0.002059	0.00929272
0.002062	0.00928478
0.002063	0.00927684
0.002064	0.00926492
0.002067	0.00925301
0.002069	0.00924507
0.002073	0.00922918
0.002077	0.0092133
0.002083	0.00920535
0.002086	0.00919741
0.002088	0.0091855
0.00209	0.00917358
0.002091	0.00916564
0.002092	0.0091577
0.002093	0.00914976
0.002094	0.00914181
0.002095	0.00913387
0.002097	0.00912593
0.002103	0.00911799
0.002111	0.00910607
0.002112	0.00909416
0.002114	0.00908224
0.002116	0.00907033
0.002117	0.00906239
0.00212	0.00905445
0.002124	0.0090465
0.002126	0.00903856
0.002131	0.00903062
0.002137	0.00902268
0.00214	0.00901473
0.002144	0.00900282
0.002145	0.00899091
0.002146	0.00897899
0.002147	0.00896311
0.00215	0.00895119
0.002154	0.00894325
0.002157	0.00893531
0.002159	0.00892737
0.00216	0.00891942
0.002161	0.00891148
0.002165	0.00890354
0.002166	0.0088956
0.002168	0.00888765
0.002169	0.00887971
0.00217	0.00887177
0.002171	0.00885985
0.00218	0.00884794
0.002183	0.00884
0.002184	0.00883206
0.00219	0.00882411
0.002193	0.00881617
0.002194	0.00880823
0.002196	0.00880029
0.002204	0.00879234
0.002207	0.0087844
0.00221	0.00877646
0.002217	0.00876852
0.002219	0.00876057
0.00222	0.00875263
0.002221	0.00874469
0.002223	0.00873675
0.002224	0.00872483
0.002226	0.00871292
0.002227	0.008701
0.002228	0.00868909
0.002231	0.00867718
0.002238	0.00866526
0.002239	0.00865732
0.00224	0.00864938
0.002241	0.00863746
0.002242	0.00862158
0.002243	0.00860967
0.002246	0.00860172
0.002247	0.00859378
0.002252	0.00858584
0.002264	0.0085779
0.002265	0.00856995
0.002266	0.00856201
0.00227	0.00855407
0.002271	0.00854613
0.002272	0.00853421
0.002273	0.0085223
0.002276	0.00851436
0.002277	0.00850641
0.002279	0.00849847
0.002283	0.00849053
0.002287	0.00847861
0.002293	0.0084667
0.002298	0.00845876
0.002304	0.00845082
0.002307	0.00844287
0.002309	0.00843096
0.00231	0.00841507
0.002311	0.00839919
0.002316	0.00838728
0.002323	0.00837933
0.002327	0.00836742
0.002331	0.00835551
0.002333	0.00834756
0.002338	0.00833168
0.002344	0.00831579
0.002346	0.00830785
0.002348	0.00829991
0.002349	0.00829197
0.00235	0.00828005
0.002353	0.00826417
0.002358	0.00824431
0.002361	0.00822843
0.002364	0.00822048
0.002366	0.00821254
0.002368	0.0082046
0.00237	0.00819268
0.002374	0.00818077
0.002378	0.00817283
0.002379	0.00816489
0.00238	0.00815694
0.002382	0.00814503
0.002385	0.00813312
0.002391	0.00812517
0.002394	0.00811723
0.002395	0.00810929
0.002396	0.00809738
0.002402	0.00808149
0.002409	0.00806561
0.00241	0.00805369
0.002411	0.00804575
0.002412	0.00803781
0.002413	0.00802986
0.002418	0.00802192
0.002419	0.00801398
0.00242	0.00800604
0.002425	0.00799412
0.002426	0.00798221
0.002432	0.00797427
0.002434	0.00796632
0.002439	0.00795441
0.002445	0.0079425
0.002446	0.00793058
0.002447	0.0079147
0.002449	0.00790278
0.002451	0.00789484
0.002456	0.00788293
0.002464	0.00787101
0.002465	0.00786307
0.002467	0.00785513
0.002468	0.00784719
0.002472	0.00783924
0.002473	0.0078313
0.002475	0.00781939
0.002485	0.0078035
0.002486	0.00779159
0.002491	0.0077757
0.002494	0.00775585
0.002495	0.00774393
0.002498	0.00773599
0.002499	0.00772408
0.002503	0.00771216
0.002504	0.00770422
0.002505	0.00769231
0.002506	0.00768039
0.002508	0.00767245
0.002512	0.00766054
0.002517	0.00764862
0.002519	0.00763671
0.00252	0.0076248
0.002524	0.00761685
0.002526	0.00760891
0.002529	0.00760097
0.002535	0.00759303
0.002537	0.00758508
0.002538	0.00757714
0.00254	0.0075692
0.002549	0.00756126
0.00255	0.00755331
0.002551	0.00754537
0.002552	0.00753346
0.002554	0.00752154
0.002556	0.0075136
0.002557	0.00750566
0.002559	0.00749772
0.002563	0.00748977
0.002573	0.00748183
0.002576	0.00746595
0.002578	0.00744609
0.002582	0.00743418
0.002583	0.00742623
0.002584	0.00741829
0.002588	0.00741035
0.002592	0.00740241
0.002594	0.00739446
0.002597	0.00738652
0.002599	0.00737461
0.002602	0.00736269
0.002606	0.00735475
0.002609	0.00734681
0.002615	0.00733887
0.002616	0.00733092
0.002618	0.00732298
0.002625	0.00731504
0.002626	0.0073071
0.002627	0.00729915
0.002639	0.00729121
0.002641	0.0072793
0.002644	0.00726738
0.002647	0.00725547
0.002648	0.00724356
0.002655	0.00723164
0.002656	0.00721179
0.002658	0.0071959
0.002662	0.00718796
0.002669	0.00718002
0.002673	0.00717207
0.002678	0.00716413
0.002681	0.00715619
0.002682	0.00714825
0.002685	0.0071403
0.00269	0.00713236
0.002691	0.00712442
0.002692	0.00711648
0.002694	0.00710853
0.002695	0.00709662
0.002705	0.00708074
0.002708	0.00706882
0.002709	0.00706088
0.002712	0.00705294
0.00272	0.00704102
0.002725	0.00702911
0.002727	0.00702117
0.002739	0.00701322
0.00274	0.00700528
0.002743	0.00699734
0.002745	0.00698543
0.002748	0.00697351
0.002749	0.0069616
0.002752	0.00694968
0.002754	0.00694174
0.002756	0.0069338
0.002757	0.00692586
0.002761	0.00691791
0.002766	0.00690997
0.002767	0.00690203
0.00277	0.00689012
0.002773	0.0068782
0.002776	0.00686232
0.002777	0.00684643
0.002781	0.00683849
0.002786	0.00683055
0.002788	0.0068226
0.002798	0.00681466
0.002799	0.00680672
0.0028	0.00679481
0.002802	0.00678289
0.002807	0.00677495
0.002808	0.00676701
0.002818	0.00675906
0.002822	0.00675112
0.002827	0.00674318
0.002829	0.00673524
0.002832	0.00672729
0.002835	0.00671935
0.002836	0.00671141
0.002838	0.00670347
0.002839	0.00669552
0.002841	0.00668758
0.002843	0.00667964
0.002855	0.0066717
0.002857	0.00666375
0.002858	0.00665581
0.00286	0.0066439
0.002863	0.00663198
0.002864	0.00662404
0.002872	0.0066161
0.002874	0.00660419
0.002881	0.00659227
0.002887	0.00658433
0.002888	0.00657639
0.002891	0.00656844
0.002896	0.0065605
0.002897	0.00655256
0.002901	0.00653667
0.002907	0.00652079
0.00291	0.00651285
0.002911	0.0065049
0.00292	0.00649696
0.002923	0.00648902
0.002924	0.00648108
0.002935	0.00646916
0.002937	0.00645725
0.00294	0.00644931
0.002946	0.00644136
0.002947	0.00643342
0.002948	0.00642548
0.00295	0.00641754
0.002952	0.00640959
0.002958	0.00640165
0.00296	0.00639371
0.002962	0.0063818
0.002964	0.00636988
0.002972	0.00636194
0.002977	0.006354
0.00298	0.00634605
0.002982	0.00633811
0.002983	0.00633017
0.002996	0.00632223
0.002998	0.00631428
0.003001	0.00630634
0.003004	0.0062984
0.003007	0.00629046
0.003008	0.00628251
0.00301	0.0062706
0.003011	0.00625869
0.003016	0.00624677
0.003017	0.00623486
0.003018	0.00622295
0.003027	0.00620706
0.003029	0.00619515
0.003031	0.0061872
0.003044	0.00617926
0.003047	0.00617132
0.003048	0.00616338
0.003052	0.00615543
0.003059	0.00614749
0.003064	0.00613558
0.003065	0.00612366
0.003071	0.00611572
0.003075	0.00610778
0.003076	0.00609984
0.003088	0.00609189
0.003092	0.00608395
0.003099	0.00607601
0.003103	0.00606807
0.003108	0.00606012
0.00311	0.00605218
0.003113	0.00604424
0.003116	0.0060363
0.00312	0.00602835
0.003121	0.00601247
0.003122	0.00599261
0.003127	0.0059807
0.003129	0.00597276
0.003132	0.00596481
0.003138	0.00595687
0.003141	0.00594893
0.003142	0.00594099
[truncated: 712 more rows]

## Sheet: s=0
0	0.994719
9.99999e-07	0.852207
2e-06	0.647652
3e-06	0.54388
4e-06	0.481725
5e-06	0.43807
5.99999e-06	0.405246
6.99999e-06	0.379268
7.99999e-06	0.358363
8.99999e-06	0.340528
9.99999e-06	0.325407
1.1e-05	0.312434
1.2e-05	0.30115
1.3e-05	0.291086
1.4e-05	0.282017
1.5e-05	0.273686
1.6e-05	0.266086
1.7e-05	0.259191
1.8e-05	0.25296
1.9e-05	0.247115
2e-05	0.241634
2.1e-05	0.236577
2.2e-05	0.23191
2.3e-05	0.227562
2.4e-05	0.22365
2.5e-05	0.220136
2.6e-05	0.216614
2.7e-05	0.21315
2.8e-05	0.209952
2.9e-05	0.206931
3e-05	0.204081
3.1e-05	0.201451
3.2e-05	0.198921
3.3e-05	0.196348
3.4e-05	0.194
3.5e-05	0.191781
3.6e-05	0.189453
3.7e-05	0.187325
3.8e-05	0.185396
3.9e-05	0.183504
4e-05	0.181712
4.1e-05	0.179762
4.2e-05	0.177871
4.3e-05	0.17617
4.4e-05	0.174415
4.5e-05	0.172722
4.6e-05	0.171117
4.7e-05	0.169627
4.8e-05	0.168225
4.9e-05	0.166819
5e-05	0.165437
5.09999e-05	0.163952
5.19999e-05	0.162471
5.29999e-05	0.16109
5.39999e-05	0.159654
5.49999e-05	0.15831
5.59999e-05	0.157078
5.69999e-05	0.155958
5.79999e-05	0.154908
5.89999e-05	0.153933
5.99999e-05	0.152946
6.09999e-05	0.151871
6.19999e-05	0.150789
6.29999e-05	0.149747
6.39999e-05	0.148793
6.49999e-05	0.147802
6.59999e-05	0.146877
6.69999e-05	0.146018
6.79999e-05	0.145142
6.89999e-05	0.144338
6.99999e-05	0.14352
7.09999e-05	0.142637
7.19999e-05	0.141795
7.29999e-05	0.141027
7.39999e-05	0.140289
7.49999e-05	0.139542
7.59999e-05	0.138787
7.69999e-05	0.138028
7.79999e-05	0.137285
7.89999e-05	0.136534
7.99999e-05	0.135804
8.09999e-05	0.135153
8.19999e-05	0.134489
8.29999e-05	0.133817
8.39999e-05	0.133112
8.49999e-05	0.132381
8.59999e-05	0.131767
8.69999e-05	0.131232
8.79999e-05	0.130622
8.89999e-05	0.129983
8.99999e-05	0.129369
9.09999e-05	0.128735
9.19999e-05	0.128137
9.29999e-05	0.127594
9.39999e-05	0.126992
9.49999e-05	0.126358
9.59999e-05	0.125822
9.69999e-05	0.125312
9.79999e-05	0.12476
9.89999e-05	0.124234
9.99999e-05	0.123703
0.000101	0.123155
0.000102	0.122628
0.000103	0.122159
0.000104	0.121728
0.000105	0.121263
0.000106	0.120873
0.000107	0.120483
0.000108	0.12001
0.000109	0.119587
0.00011	0.119139
0.000111	0.118629
0.000112	0.11816
0.000113	0.117778
0.000114	0.117455
0.000115	0.117052
0.000116	0.116555
0.000117	0.11609
0.000118	0.115663
0.000119	0.115219
0.00012	0.114816
0.000121	0.114422
0.000122	0.114007
0.000123	0.113663
0.000124	0.113281
0.000125	0.112858
0.000126	0.112468
0.000127	0.11212
0.000128	0.111775
0.000129	0.111381
0.00013	0.111008
0.000131	0.110651
0.000132	0.110298
0.000133	0.109933
0.000134	0.109552
0.000135	0.109137
0.000136	0.108784
0.000137	0.108486
0.000138	0.108129
0.000139	0.107793
0.00014	0.107469
0.000141	0.107121
0.000142	0.106751
0.000143	0.10639
0.000144	0.106083
0.000145	0.105835
0.000146	0.105602
0.000147	0.105362
0.000148	0.1051
0.000149	0.104831
0.00015	0.104602
0.000151	0.104337
0.000152	0.10403
0.000153	0.103752
0.000154	0.103449
0.000155	0.103167
0.000156	0.102906
0.000157	0.102673
0.000158	0.102433
0.000159	0.102151
0.00016	0.101906
0.000161	0.101678
0.000162	0.101416
0.000163	0.101151
0.000164	0.100927
0.000165	0.100674
0.000166	0.100454
0.000167	0.100205
0.000168	0.0998938
0.000169	0.0995868
0.00017	0.0992466
0.000171	0.0989521
0.000172	0.0987239
0.000173	0.0985248
0.000174	0.0982966
0.000175	0.0980435
0.000176	0.0978237
0.000177	0.0975747
0.000178	0.0973051
0.000179	0.0970852
0.00018	0.0968695
0.000181	0.0966496
0.000182	0.0964546
0.000183	0.0962513
0.000184	0.0960107
0.000185	0.095766
0.000186	0.0955544
0.000187	0.0953718
0.000188	0.0951852
0.000189	0.0950151
0.00019	0.0948242
0.000191	0.0945712
0.000192	0.0943181
0.000193	0.0940816
0.000194	0.0938866
0.000195	0.0936917
0.000196	0.0934676
0.000197	0.0932727
0.000198	0.0930901
0.000199	0.0929283
0.0002	0.092779
0.000201	0.0925964
0.000202	0.0923973
0.000203	0.0922272
0.000204	0.0920322
0.000205	0.0918206
0.000206	0.0916506
0.000207	0.0914639
0.000208	0.0912606
0.000209	0.0910739
0.00021	0.0908872
0.000211	0.0907213
0.000212	0.0905802
0.000213	0.0904309
0.000214	0.0902649
0.000215	0.0900907
0.000216	0.0898916
0.000217	0.089709
0.000218	0.089568
0.000219	0.0894145
0.00022	0.0892485
0.000221	0.0890535
0.000222	0.0888461
0.000223	0.0886387
0.000224	0.0884644
0.000225	0.0883441
0.000226	0.0881865
0.000227	0.0880039
0.000228	0.0878629
0.000229	0.0876928
0.00023	0.0874937
0.000231	0.0873111
0.000232	0.0871286
0.000233	0.0869253
0.000234	0.0867345
0.000235	0.086581
0.000236	0.0863984
0.000237	0.0862325
0.000238	0.0861246
0.000239	0.0860292
0.00024	0.0858965
0.000241	0.0857098
0.000242	0.0855521
0.000243	0.0854111
0.000244	0.0852493
0.000245	0.0850999
0.000246	0.0849796
0.000247	0.0848801
0.000248	0.0847473
0.000249	0.0846063
0.00025	0.0844611
0.000251	0.0842993
0.000252	0.0841499
0.000253	0.084013
0.000254	0.0838761
0.000255	0.0837558
0.000256	0.0836313
0.000257	0.0834695
0.000258	0.0833326
0.000259	0.083175
0.00026	0.0829842
0.000261	0.0828763
0.000262	0.0827975
0.000263	0.0826772
0.000264	0.082532
0.000265	0.0823743
0.000266	0.0822001
0.000267	0.08203
0.000268	0.0818765
0.000269	0.0817603
0.00027	0.0816566
0.000271	0.0815114
0.000272	0.0813745
0.000273	0.0812749
0.000274	0.0811795
0.000275	0.0810758
0.000276	0.0809348
0.000277	0.0807564
0.000278	0.0806236
0.000279	0.0805158
0.00028	0.0804037
0.000281	0.0802793
0.000282	0.0801175
0.000283	0.0799598
0.000284	0.0798146
0.000285	0.0796943
0.000286	0.0795657
0.000287	0.0793998
0.000288	0.0792587
0.000289	0.0791343
0.00029	0.0790264
0.000291	0.078931
0.000292	0.0788148
0.000293	0.0786987
0.000294	0.0786033
0.000295	0.0784995
0.000296	0.0783834
0.000297	0.0782672
0.000298	0.0781428
0.000299	0.0780225
0.0003	0.0779146
0.000301	0.0777984
0.000302	0.0776947
0.000303	0.07762
0.000304	0.0775205
0.000305	0.077396
0.000306	0.0772882
0.000307	0.077172
0.000308	0.07706
0.000309	0.0769812
0.00031	0.0768816
0.000311	0.0767613
0.000312	0.0766327
0.000313	0.0765124
0.000314	0.0764211
0.000315	0.0763174
0.000316	0.076168
0.000317	0.0760187
0.000318	0.0759108
0.000319	0.0758154
0.00032	0.0757034
0.000321	0.0755831
0.000322	0.0754835
0.000323	0.0754088
0.000324	0.0753176
0.000325	0.0751931
0.000326	0.0750811
0.000327	0.0749649
0.000328	0.0748529
0.000329	0.0747575
0.00033	0.0746289
0.000331	0.0745086
0.000332	0.0744049
0.000333	0.0743136
0.000334	0.0742265
0.000335	0.0741394
0.000336	0.0740606
0.000337	0.0739734
0.000338	0.0738614
0.000339	0.0737619
0.00034	0.0736664
0.000341	0.0735586
0.000342	0.0734466
0.000343	0.0733346
0.000344	0.0732557
0.000345	0.0731728
0.000346	0.0730939
0.000347	0.0730151
0.000348	0.0729238
0.000349	0.0728409
0.00035	0.0727496
0.000351	0.0726625
0.000352	0.0725878
0.000353	0.0724882
0.000354	0.0723928
0.000355	0.0723098
0.000356	0.0722144
0.000357	0.0720817
0.000358	0.0719572
0.000359	0.071866
0.00036	0.071783
0.000361	0.0717208
0.000362	0.0716419
0.000363	0.0715507
0.000364	0.0714718
0.000365	0.0713889
0.000366	0.0712893
0.000367	0.0711856
0.000368	0.0711151
0.000369	0.071057
0.00037	0.0709823
0.000371	0.0709076
0.000372	0.0708164
0.000373	0.0707002
0.000374	0.0706048
0.000375	0.0705301
0.000376	0.0704388
0.000377	0.0703227
0.000378	0.0702148
0.000379	0.0701194
0.00038	0.0700281
0.000381	0.069941
0.000382	0.0698539
0.000383	0.0697792
0.000384	0.0696921
0.000385	0.0696133
0.000386	0.0695137
0.000387	0.0694017
0.000388	0.0693021
0.000389	0.0692109
0.00039	0.0691362
0.000391	0.0690532
0.000392	0.0689661
0.000393	0.0688956
0.000394	0.0688541
0.000395	0.0688001
0.000396	0.0687213
0.000397	0.0686591
0.000398	0.068601
0.000399	0.0685305
0.0004	0.0684475
0.000401	0.0683687
0.000402	0.0683148
0.000403	0.0682318
0.000404	0.0681281
0.000405	0.0680575
0.000406	0.0680078
0.000407	0.0679289
0.000408	0.0678667
0.000409	0.0678294
0.00041	0.0677589
0.000411	0.0676925
0.000412	0.0676219
0.000413	0.0675556
0.000414	0.0675099
0.000415	0.0674602
0.000416	0.0673855
0.000417	0.0673067
0.000418	0.0672444
0.000419	0.0671698
0.00042	0.0670992
0.000421	0.0670328
0.000422	0.0669665
0.000423	0.0669125
0.000424	0.066842
0.000425	0.0667507
0.000426	0.0666387
0.000427	0.0665475
0.000428	0.0664977
0.000429	0.066423
0.00043	0.0663359
0.000431	0.0662654
0.000432	0.0661907
0.000433	0.0661036
0.000434	0.0659999
0.000435	0.0659252
0.000436	0.0658795
0.000437	0.0658049
0.000438	0.0657343
0.000439	0.0656887
0.00044	0.0656555
0.000441	0.0656057
0.000442	0.0655269
0.000443	0.0654605
0.000444	0.0653983
0.000445	0.0653319
0.000446	0.0652738
0.000447	0.0652158
0.000448	0.0651411
0.000449	0.0650747
0.00045	0.0650374
0.000451	0.0649917
0.000452	0.0649171
0.000453	0.0648424
0.000454	0.064776
0.000455	0.0647221
0.000456	0.0646889
0.000457	0.064664
0.000458	0.0646433
0.000459	0.0646101
0.00046	0.0645644
0.000461	0.0645105
0.000462	0.0644358
0.000463	0.0643695
0.000464	0.0643155
0.000465	0.0642574
0.000466	0.0642035
0.000467	0.064162
0.000468	0.064133
0.000469	0.0640832
0.00047	0.064021
0.000471	0.0639504
0.000472	0.063855
0.000473	0.0637845
0.000474	0.0637389
0.000475	0.0636849
0.000476	0.0636435
0.000477	0.0635978
0.000478	0.0635439
0.000479	0.0634941
0.00048	0.0634443
0.000481	0.0633862
0.000482	0.0633157
0.000483	0.0632576
0.000484	0.0632079
0.000485	0.0631456
0.000486	0.0630792
0.000487	0.0630046
0.000488	0.0629506
0.000489	0.0628926
0.00049	0.0628262
0.000491	0.0627723
0.000492	0.0626893
0.000493	0.0626146
0.000494	0.0625441
0.000495	0.0624736
0.000496	0.0624113
0.000497	0.0623408
0.000498	0.0622786
0.000499	0.0622329
0.0005	0.0621873
0.000500999	0.0621168
0.000501999	0.0620587
0.000502999	0.0620048
0.000503999	0.0619301
0.000504999	0.0618596
0.000505999	0.0618056
0.000506999	0.06176
0.000507999	0.0617102
0.000508999	0.0616397
0.000509999	0.0615692
0.000510999	0.0615111
0.000511999	0.0614654
0.000512999	0.0614198
0.000513999	0.061341
0.000514999	0.0612829
0.000515999	0.0612331
0.000516999	0.0611626
0.000517999	0.0611128
0.000518999	0.0610506
0.000519999	0.0609801
0.000520999	0.0609137
0.000521999	0.060839
0.000522999	0.0607892
0.000523999	0.060756
0.000524999	0.0607311
0.000525999	0.0607063
0.000526999	0.0606648
0.000527999	0.0606191
0.000528999	0.0605735
0.000529999	0.0605154
0.000530999	0.0604283
0.000531999	0.060337
0.000532999	0.0602831
0.000533999	0.0602582
0.000534999	0.0602458
0.000535999	0.0602209
0.000536999	0.0601752
0.000537999	0.0601255
0.000538999	0.0600591
0.000539999	0.0599927
0.000540999	0.0599595
0.000541999	0.059918
0.000542999	0.0598724
0.000543999	0.0598309
0.000544999	0.0597687
0.000545999	0.059723
0.000546999	0.0596899
0.000547999	0.0596608
0.000548999	0.0596359
0.000549999	0.0595861
0.000550999	0.0595281
0.000551999	0.05947
0.000552999	0.059416
0.000553999	0.0593787
0.000554999	0.0593289
0.000555999	0.0592667
0.000556999	0.0592211
0.000557999	0.0591879
0.000558999	0.0591339
0.000559999	0.059051
0.000560999	0.058997
0.000561999	0.0589597
0.000562999	0.0589058
0.000563999	0.0588643
0.000564999	0.0588104
0.000565999	0.0587564
0.000566999	0.0587274
0.000567999	0.0586652
0.000568999	0.058578
0.000569999	0.0585241
0.000570999	0.0584702
0.000571999	0.0584162
0.000572999	0.0583706
0.000573999	0.0583208
0.000574999	0.0582835
0.000575999	0.0582461
0.000576999	0.0581881
0.000577999	0.05813
0.000578999	0.0581009
0.000579999	0.0580719
0.000580999	0.058018
0.000581999	0.0579765
0.000582999	0.0579226
0.000583999	0.0578437
0.000584999	0.0577898
0.000585999	0.0577483
0.000586999	0.0576902
0.000587999	0.0576239
0.000588999	0.0575616
0.000589999	0.0575035
0.000590999	0.0574579
0.000591999	0.0574289
0.000592999	0.0574081
0.000593999	0.0573666
0.000594999	0.0573127
0.000595999	0.0572712
0.000596999	0.0572173
0.000597999	0.0571551
0.000598999	0.0571094
0.000599999	0.0570638
0.000600999	0.0570016
0.000601999	0.0569476
0.000602999	0.0569227
0.000603999	0.0568813
0.000604999	0.0568273
0.000605999	0.056761
0.000606999	0.0566987
0.000607999	0.0566614
0.000608999	0.056624
0.000609999	0.0565992
0.000610999	0.0565743
0.000611999	0.0565535
0.000612999	0.0565286
0.000613999	0.0564871
0.000614999	0.056454
0.000615999	0.0564208
0.000616999	0.0563876
0.000617999	0.0563419
0.000618999	0.0562963
0.000619999	0.0562631
0.000620999	0.0562258
0.000621999	0.0561843
0.000622999	0.0561387
0.000623999	0.0561096
0.000624999	0.0560681
0.000625999	0.0560184
0.000626999	0.0559769
0.000627999	0.0559437
0.000628999	0.0559146
0.000629999	0.0558607
0.000630999	0.0558109
0.000631999	0.0557736
0.000632999	0.0557321
0.000633999	0.0557072
0.000634999	0.0556823
0.000635999	0.0556408
0.000636999	0.0556076
0.000637999	0.0555828
0.000638999	0.0555579
0.000639999	0.0555205
0.000640999	0.0554915
0.000641999	0.0554707
0.000642999	0.0554334
0.000643999	0.0553961
0.000644999	0.0553546
0.000645999	0.0553048
0.000646999	0.0552633
0.000647999	0.0552343
0.000648999	0.0551969
0.000649999	0.0551513
0.000650999	0.055114
0.000651999	0.0550932
0.000652999	0.05506
0.000653999	0.0550144
0.000654999	0.0549854
0.000655999	0.0549522
0.000656999	0.0549065
0.000657999	0.0548692
0.000658999	0.0548236
0.000659999	0.0547821
0.000660999	0.0547655
0.000661999	0.0547281
0.000662999	0.0546784
0.000663999	0.0546327
0.000664999	0.0545829
0.000665999	0.0545456
0.000666999	0.0545207
0.000667999	0.0544875
0.000668999	0.054446
0.000669999	0.0544129
0.000670999	0.0543797
0.000671999	0.0543257
0.000672999	0.0542842
0.000673999	0.0542677
0.000674999	0.0542386
0.000675999	0.0542013
0.000676999	0.0541639
0.000678999	0.0541224
0.000679999	0.0540851
0.000680999	0.0540561
0.000681999	0.0540187
0.000682999	0.0539772
0.000683999	0.0539482
0.000684999	0.0539067
0.000685999	0.0538486
0.000686999	0.0537823
0.000687999	0.0537325
0.000688999	0.0537117
0.000689999	0.0536827
0.000690999	0.0536371
0.000691999	0.0535914
0.000692999	0.0535499
0.000693999	0.0535209
0.000694999	0.0535043
0.000695999	0.0534877
0.000696999	0.0534753
0.000697999	0.0534587
0.000698999	0.0534338
0.000699999	0.0534047
0.000700999	0.0533757
0.000701999	0.0533591
0.000702999	0.0533301
0.000703999	0.0532969
0.000704999	0.053272
0.000705999	0.0532429
0.000706999	0.0532181
0.000707999	0.053189
0.000708999	0.05316
0.000709999	0.0531268
0.000710999	0.0530936
0.000711999	0.0530729
0.000712999	0.0530563
0.000714999	0.0530397
0.000715999	0.0530023
0.000716999	0.0529443
0.000717999	0.0528945
0.000718999	0.052853
0.000719999	0.0528198
0.000720999	0.0527991
0.000721999	0.0527659
0.000722999	0.0527244
0.000723999	0.052687
0.000724999	0.0526497
0.000725999	0.0526207
0.000726999	0.0525958
0.000727999	0.0525709
0.000728999	0.0525294
0.000729999	0.0524838
0.000730999	0.052463
0.000732999	0.0524423
0.000733999	0.0524091
0.000734999	0.0523759
0.000735999	0.0523386
0.000736999	0.0523095
0.000737999	0.0522888
0.000738999	0.0522639
0.000739999	0.0522224
0.000740999	0.0521726
0.000741999	0.0521353
0.000742999	0.0521104
0.000743999	0.0520689
0.000744999	0.0520233
0.000745999	0.0519859
0.000746999	0.0519444
0.000747999	0.0519154
0.000748999	0.0518947
0.000749999	0.0518739
0.000750999	0.0518324
0.000751999	0.0517951
0.000752999	0.0517578
0.000753999	0.0517204
0.000755999	0.0516831
0.000756999	0.0516291
0.000757999	0.0515835
0.000758999	0.0515586
0.000759999	0.0515337
0.000760999	0.0514798
0.000761999	0.0514176
0.000762999	0.0513761
0.000763999	0.0513263
0.000764999	0.0512724
0.000765999	0.0512309
0.000766999	0.0511935
0.000767999	0.0511687
0.000768999	0.0511438
0.000769999	0.0511189
0.000770999	0.0510981
0.000771999	0.0510774
0.000773999	0.0510608
0.000774999	0.0510442
0.000775999	0.0510235
0.000776999	0.0509944
0.000777999	0.0509612
0.000778999	0.0509239
0.000779999	0.0508866
0.000781999	0.0508534
0.000782999	0.050816
0.000783999	0.0507787
0.000785999	0.0507496
0.000786999	0.0507248
0.000787999	0.050704
0.000788999	0.0506874
0.000789999	0.0506501
0.000790999	0.0506127
0.000791999	0.0505796
0.000792999	0.0505339
0.000793999	0.05048
0.000794999	0.0504427
0.000795999	0.0504261
0.000796999	0.0504012
0.000797999	0.0503721
0.000798999	0.0503389
0.000799999	0.0503058
0.000800999	0.0502726
0.000801999	0.0502435
0.000802999	0.0502269
0.000803999	0.0502103
0.000804999	0.0501896
0.000805999	0.050173
0.000806999	0.050144
0.000807999	0.0501108
0.000808999	0.0500942
0.000809999	0.0500734
0.000810999	0.0500527
0.000811999	0.0500361
0.000812999	0.0500071
0.000813999	0.0499614
0.000814999	0.0499282
0.000815999	0.0498992
0.000816999	0.0498536
0.000817999	0.0497996
0.000819999	0.0497623
0.000820999	0.0497374
0.000821999	0.0497125
0.000823999	0.0497001
0.000825999	0.0496793
0.000826999	0.049642
0.000827999	0.0496046
0.000828999	0.0495839
0.000829999	0.0495673
0.000830999	0.0495424
0.000831999	0.0495134
0.000832999	0.0494926
0.000833999	0.0494719
0.000836999	0.0494428
0.000837999	0.0494221
0.000838999	0.0493972
0.000839999	0.049364
0.000840999	0.0493391
0.000841999	0.0493225
0.000842999	0.0493018
0.000843999	0.0492769
0.000844999	0.0492354
0.000845999	0.0491981
0.000846999	0.0491773
0.000847999	0.0491441
0.000848999	0.0491027
0.000849999	0.049057
0.000850999	0.0490238
0.000851999	0.0490031
0.000852999	0.0489824
0.000853999	0.0489699
0.000854999	0.0489575
0.000855999	0.0489326
0.000856999	0.0489118
0.000857999	0.0488911
0.000858999	0.0488579
0.000859999	0.048833
0.000860999	0.0488081
0.000861999	0.0487749
0.000862999	0.0487417
0.000863999	0.048721
0.000864999	0.0487002
0.000865999	0.0486588
0.000866999	0.0486256
0.000867999	0.0485924
0.000868999	0.0485633
0.000869999	0.0485509
0.000870999	0.0485343
0.000871999	0.0485136
0.000872999	0.0484845
0.000873999	0.0484638
0.000875999	0.048443
0.000876999	0.0484015
0.000877999	0.0483601
0.000878999	0.0483352
0.000879999	0.0483103
0.000880999	0.0482812
0.000881999	0.0482563
0.000882999	0.0482273
0.000883999	0.0481983
0.000884999	0.0481734
0.000885999	0.0481526
0.000886999	0.0481153
0.000887999	0.0480821
0.000888999	0.0480655
0.000889999	0.0480365
0.000890999	0.0480157
0.000891999	0.0479991
0.000892999	0.0479742
0.000893999	0.0479535
0.000894999	0.0479328
0.000895999	0.0479037
0.000896999	0.047883
0.000897999	0.0478664
0.000898999	0.0478415
0.000899999	0.0478166
0.000900999	0.0478
0.000901999	0.0477751
0.000902999	0.0477461
0.000903999	0.0477295
0.000904999	0.0477087
0.000905999	0.047688
0.000906999	0.0476631
0.000907999	0.0476341
0.000908999	0.0476175
0.000910999	0.047605
0.000911999	0.0475926
0.000912999	0.0475843
0.000913999	0.0475718
0.000914999	0.0475552
0.000916999	0.0475428
0.000917999	0.0475262
0.000918999	0.0475013
0.000919999	0.0474806
0.000920999	0.047464
0.000921999	0.0474474
0.000922999	0.0474183
0.000923999	0.047381
0.000924999	0.0473478
0.000925999	0.0473146
0.000926999	0.0472897
0.000927999	0.0472731
0.000928999	0.0472565
0.000929999	0.0472441
0.000930999	0.0472316
0.000931999	0.0472192
0.000932999	0.0471943
0.000933999	0.0471653
0.000934999	0.0471362
0.000935999	0.0470947
0.000936999	0.0470699
0.000937999	0.0470574
0.000938999	0.0470367
0.000939999	0.0470159
0.000940999	0.0470035
0.000941999	0.046991
0.000942999	0.0469703
0.000943999	0.0469454
0.000944999	0.0469288
0.000945999	0.0469205
0.000946999	0.0468998
0.000948999	0.0468707
0.000949999	0.0468417
0.000950999	0.0468043
0.000951999	0.0467712
0.000952999	0.0467546
0.000953999	0.046738
0.000954999	0.0467214
0.000955999	0.0467089
0.000956999	0.0466882
0.000957999	0.0466633
0.000958999	0.0466425
0.000959999	0.0466218
0.000960999	0.0465845
0.000962999	0.046543
0.000964999	0.0465222
0.000965999	0.0465015
0.000966999	0.0464766
0.000967999	0.0464559
0.000968999	0.0464393
0.000969999	0.0464227
0.000970999	0.0464019
0.000971999	0.0463853
0.000972999	0.0463687
0.000973999	0.0463521
0.000974999	0.0463273
0.000975999	0.0463024
0.000977999	0.0462816
0.000978999	0.0462567
0.000979999	0.0462401
0.000980999	0.0462235
0.000981999	0.0461862
0.000982999	0.0461406
0.000983999	0.0461157
0.000985999	0.0461032
0.000986999	0.0460866
0.000988999	0.0460659
0.000989999	0.0460452
0.000990999	0.0460244
0.000991999	0.0459954
0.000992999	0.0459705
0.000993999	0.045958
0.000994999	0.0459456
0.000995999	0.0459124
0.000996999	0.0458834
0.000997999	0.0458585
0.000998999	0.0458294
0.000999999	0.0458128
0.001002	0.0458004
0.001003	0.0457921
0.001004	0.0457755
0.001005	0.0457506
0.001006	0.0457174
0.001008	0.0456718
0.001009	0.0456386
0.00101	0.0456178
0.001011	0.0455971
0.001014	0.0455639
0.001015	0.0455183
0.001016	0.0454809
0.001017	0.0454561
0.001018	0.0454395
0.001019	0.045427
0.00102	0.0454146
0.001021	0.0454021
0.001022	0.0453897
0.001023	0.0453731
0.001024	0.0453565
0.001025	0.0453357
0.001026	0.0453109
0.001027	0.0452901
0.001028	0.0452652
0.00103	0.0452362
0.001031	0.045203
0.001032	0.0451781
0.001033	0.0451698
0.001034	0.0451615
0.001035	0.0451532
0.001036	0.0451366
0.001038	0.0451159
0.001039	0.0451034
0.00104	0.045091
0.001041	0.0450744
0.001043	0.0450578
0.001044	0.0450412
0.001045	0.0450246
0.001046	0.045008
0.001047	0.0449873
0.001048	0.0449665
0.00105	0.0449499
0.001052	0.0449375
0.001053	0.044925
0.001054	0.0449001
0.001055	0.0448794
0.001057	0.0448711
0.001058	0.0448628
0.001059	0.0448338
0.001061	0.0448047
0.001062	0.0447964
0.001063	0.044784
0.001064	0.0447674
0.001065	0.0447549
0.001066	0.0447425
0.001067	0.0447176
0.001068	0.0446927
0.001069	0.0446761
0.00107	0.0446637
0.001071	0.0446471
0.001072	0.0446222
0.001073	0.0445849
0.001075	0.0445475
0.001076	0.0445309
0.001077	0.0445019
0.001078	0.0444728
0.00108	0.0444645
0.001081	0.0444397
0.001082	0.0444023
0.001083	0.0443733
0.001084	0.0443567
0.001085	0.0443442
0.001086	0.0443235
0.001087	0.0442945
0.001088	0.0442654
0.001089	0.0442405
0.00109	0.0442198
0.001091	0.0442073
0.001092	0.0441907
0.001093	0.04417
0.001094	0.0441327
0.001095	0.0440912
0.001096	0.0440704
0.001097	0.0440497
0.001098	0.0440165
0.001099	0.0439916
0.0011	0.0439792
0.001101	0.043946
0.001102	0.0439128
0.001103	0.0438962
0.001104	0.0438754
0.001105	0.0438464
0.001106	0.0438215
0.001107	0.0438008
0.001108	0.0437842
0.001109	0.0437676
0.00111	0.043751
0.001111	0.0437344
0.001112	0.0437178
0.001113	0.0436971
0.001114	0.0436763
0.001115	0.043668
0.001116	0.0436473
0.001117	0.0436182
0.001118	0.0435892
0.001119	0.0435684
0.00112	0.043556
0.001121	0.0435436
0.001122	0.0435353
0.001123	0.043527
0.001125	0.0435187
0.001126	0.0435062
0.001127	0.0434938
0.001128	0.0434813
0.001129	0.0434689
0.00113	0.0434606
0.001132	0.0434398
0.001133	0.0434191
0.001134	0.0434025
0.001135	0.0433818
0.001136	0.0433693
0.001137	0.0433527
0.001138	0.0433154
0.00114	0.0432822
0.001141	0.0432697
0.001142	0.0432366
0.001143	0.0431951
0.001144	0.0431702
0.001147	0.0431536
0.001148	0.0431411
0.001149	0.0431287
0.001151	0.0431204
0.001152	0.0430997
0.001153	0.0430789
0.001155	0.0430706
0.001156	0.0430457
0.001157	0.0430208
0.001158	0.0430001
0.00116	0.0429669
0.001161	0.042942
0.001162	0.0429296
0.001163	0.0429213
0.001164	0.0429005
0.001165	0.0428673
0.001166	0.0428466
0.001167	0.04283
0.001168	0.0427968
0.001169	0.0427719
0.00117	0.0427595
0.001171	0.0427346
0.001172	0.0427014
0.001173	0.0426682
0.001175	0.0426475
0.001176	0.0426392
0.001177	0.0426309
0.001178	0.0426184
0.001179	0.042606
0.00118	0.0425811
0.001181	0.0425437
0.001182	0.042523
0.001183	0.0425147
0.001185	0.0424898
0.001186	0.0424649
0.001187	0.0424483
0.001188	0.0424317
0.00119	0.0424068
0.001191	0.042382
0.001192	0.0423695
0.001193	0.0423571
0.001194	0.0423488
0.001195	0.0423363
0.001196	0.0423197
0.001197	0.0423073
0.001198	0.0422948
0.001199	0.0422741
0.0012	0.042245
0.001201	0.0422202
0.001202	0.0421994
0.001203	0.0421745
0.001204	0.0421496
0.001205	0.0421289
0.001207	0.0421164
0.001208	0.042104
0.001209	0.0420916
0.001212	0.042075
0.001214	0.0420501
0.001215	0.042021
0.001216	0.0420003
0.001217	0.0419878
0.001219	0.0419754
0.00122	0.0419546
0.001221	0.0419256
0.001222	0.041909
0.001223	0.0418966
0.001224	0.0418758
0.001225	0.0418592
0.001227	0.0418468
0.001228	0.0418302
0.001229	0.041797
0.001231	0.0417597
0.001232	0.0417306
0.001233	0.0417016
0.001234	0.0416808
0.001235	0.0416684
0.001237	0.0416477
0.001238	0.0416228
0.001239	0.0416062
0.00124	0.041573
0.001241	0.0415315
0.001242	0.0415066
0.001245	0.0414859
0.001248	0.0414651
0.001249	0.0414527
0.00125	0.0414402
0.001253	0.0414195
0.001254	0.0413987
0.001256	0.0413821
0.001258	0.0413697
0.001259	0.0413573
0.00126	0.0413448
0.001262	0.0413324
0.001263	0.0413158
0.001264	0.041295
0.001265	0.0412784
0.001266	0.041266
0.001267	0.0412535
0.001268	0.0412411
0.001269	0.0412286
0.001271	0.0412121
0.001272	0.0411955
0.001273	0.0411747
0.001274	0.041154
0.001275	0.0411415
0.001276	0.0411208
0.001279	0.0411042
0.00128	0.0410959
0.001281	0.0410876
0.001282	0.0410751
0.001283	0.0410586
0.001284	0.0410378
0.001285	0.0410129
0.001286	0.040988
0.001288	0.0409673
0.001289	0.0409548
0.001291	0.0409424
0.001293	0.0409299
0.001294	0.0409175
0.001296	0.0409009
0.001297	0.0408885
0.001298	0.040876
0.001299	0.0408594
0.0013	0.0408428
0.001301	0.0408304
0.001302	0.0408179
0.001303	0.0408055
0.001304	0.0407972
0.001307	0.0407889
0.001308	0.0407806
0.001309	0.040764
0.00131	0.0407474
0.001311	0.0407391
0.001312	0.0407184
0.001313	0.0406935
0.001314	0.0406727
0.001315	0.040652
0.001316	0.0406395
0.001317	0.0406312
0.001318	0.0406147
0.001319	0.0405856
0.00132	0.0405649
0.001321	0.0405566
0.001323	0.0405441
0.001324	0.0405317
0.001325	0.0405234
0.001326	0.0405026
0.001327	0.0404736
0.001329	0.0404487
0.00133	0.0404238
0.001331	0.0404072
0.001332	0.0403948
0.001333	0.0403782
0.001334	0.0403657
0.001336	0.0403574
0.00134	0.0403408
0.001341	0.040316
0.001342	0.0402869
0.001343	0.0402662
0.001344	0.0402537
0.001345	0.0402247
0.001347	0.0401998
0.001348	0.0401915
0.001349	0.0401832
0.001351	0.0401708
0.001352	0.0401583
0.001353	0.04015
0.001356	0.0401376
0.001358	0.0401251
0.001359	0.0401085
0.00136	0.0400878
0.001362	0.0400753
0.001363	0.040067
0.001365	0.0400587
0.001366	0.0400463
0.001367	0.0400339
0.001369	0.040009
0.00137	0.0399799
0.001371	0.0399592
0.001372	0.0399426
0.001374	0.0399177
0.001375	0.0398928
0.001376	0.0398762
0.001377	0.0398596
0.001378	0.0398513
0.001379	0.0398389
0.001383	0.039814
0.001384	0.0397849
0.001385	0.0397642
0.001386	0.0397476
0.001387	0.0397352
0.001389	0.0397186
0.001391	0.0396895
0.001393	0.0396646
0.001394	0.039648
0.001396	0.0396314
0.001397	0.0396065
0.001398	0.0395858
0.001399	0.0395734
0.0014	0.0395568
0.001401	0.0395402
0.001402	0.0395153
0.001403	0.0394904
0.001404	0.0394779
0.001405	0.0394572
0.001406	0.0394323
0.001407	0.0394157
0.001408	0.039395
0.001409	0.0393784
0.001411	0.0393659
0.001412	0.0393493
0.001413	0.0393369
0.001414	0.0393244
0.001415	0.0393078
0.001416	0.0392913
0.001418	0.0392788
0.001419	0.0392705
0.00142	0.0392622
0.001421	0.0392373
0.001422	0.0392124
0.001425	0.0391875
0.001426	0.0391544
0.001427	0.0391253
0.001428	0.0391046
0.001429	0.0390963
0.00143	0.0390838
0.001431	0.0390631
0.001433	0.0390423
0.001434	0.0390174
0.001435	0.0389967
0.001437	0.0389843
0.001438	0.0389635
0.001439	0.0389469
0.00144	0.0389345
0.001441	0.0389096
0.001442	0.0388805
0.001445	0.038864
0.001446	0.0388474
0.001448	0.0388266
0.001449	0.0388142
0.00145	0.0388059
0.001451	0.0387934
0.001452	0.038781
0.001453	0.0387561
0.001454	0.0387229
0.001457	0.0387063
0.001458	0.038698
0.001459	0.0386897
0.001462	0.0386773
0.001463	0.0386565
0.001464	0.0386399
0.001467	0.0386316
0.001468	0.0386192
0.001469	0.0385984
0.00147	0.0385818
0.001473	0.0385736
0.001474	0.0385528
0.001475	0.0385321
0.001477	0.0385238
0.001479	0.0385155
0.00148	0.038503
0.001481	0.0384864
0.001482	0.0384698
0.001483	0.0384491
0.001484	0.0384283
0.001487	0.0384159
0.001488	0.0383993
0.001489	0.0383786
0.00149	0.0383537
0.001493	0.0383329
0.001494	0.0383163
0.001495	0.0382956
0.001496	0.038279
0.001497	0.0382624
0.001498	0.03825
0.0015	0.0382417
0.001501	0.0382334
0.001502	0.0382209
0.001504	0.0382085
0.001505	0.0382002
0.001506	0.0381919
0.001507	0.0381753
0.001508	0.0381504
0.001509	0.0381338
0.00151	0.0381214
0.001511	0.0381089
0.001512	0.0381006
0.001513	0.0380923
0.001514	0.0380799
0.001515	0.0380674
0.001516	0.0380591
0.001517	0.0380508
0.001519	0.0380425
0.00152	0.0380301
0.001521	0.0380135
0.001522	0.0379969
0.001523	0.0379803
0.001524	0.0379679
0.001525	0.0379554
0.001526	0.0379264
0.001527	0.0379015
0.001529	0.0378849
0.00153	0.0378641
0.001531	0.0378517
0.001533	0.0378434
0.001534	0.0378351
0.001535	0.0378268
0.001536	0.0378102
0.001537	0.0377853
0.001538	0.0377687
0.00154	0.0377521
0.001541	0.0377355
0.001542	0.0377231
0.001543	0.0377065
0.001544	0.0376899
0.001545	0.037665
0.001546	0.0376318
0.001551	0.0375986
0.001553	0.0375779
0.001554	0.0375696
0.001555	0.0375613
0.001556	0.0375488
0.001557	0.0375323
0.001558	0.0375157
0.00156	0.0375032
0.001561	0.0374949
0.001563	0.0374866
0.001564	0.0374742
0.001565	0.0374576
0.001566	0.0374451
0.001567	0.0374368
0.001568	0.0374285
0.001569	0.0374161
0.00157	0.0373995
0.001571	0.0373871
0.001572	0.0373788
0.001573	0.0373663
0.001574	0.0373539
0.001575	0.0373414
0.001576	0.0373248
0.001577	0.0373124
0.001578	0.0372958
0.001579	0.037275
0.00158	0.0372626
0.001582	0.0372543
0.001583	0.0372253
0.001584	0.0371879
0.001585	0.0371547
0.001588	0.0371215
0.001589	0.0371008
0.00159	0.0370801
0.001594	0.0370635
0.001595	0.037051
0.001597	0.0370386
0.001598	0.0370303
0.001599	0.037022
0.0016	0.0370054
0.001601	0.0369805
0.001602	0.0369556
0.001603	0.036939
0.001604	0.0369224
0.001605	0.0369017
0.001606	0.0368851
0.001607	0.0368726
0.001609	0.036856
0.00161	0.036827
0.001611	0.0368063
0.001612	0.0367938
0.001613	0.0367814
0.001614	0.0367731
0.001615	0.0367648
0.001616	0.036744
0.001618	0.0367233
0.001619	0.036715
0.00162	0.0367025
0.001621	0.0366901
0.001622	0.0366818
0.001623	0.0366735
0.001624	0.0366652
0.001627	0.0366569
0.001628	0.0366445
0.001629	0.036632
0.00163	0.0366196
0.001632	0.0366071
0.001633	0.0365947
0.001634	0.0365739
0.001636	0.0365532
0.001638	0.0365366
0.001639	0.0365159
0.00164	0.0364993
0.001642	0.036491
0.001643	0.0364702
0.001644	0.0364453
0.001646	0.0364287
0.001647	0.0364163
0.00165	0.036408
0.001651	0.0363997
0.001652	0.0363914
0.001653	0.0363831
0.001655	0.0363748
0.001656	0.0363624
0.001657	0.0363375
0.001658	0.0363043
0.001659	0.0362835
0.00166	0.0362752
0.001664	0.0362628
0.001665	0.0362462
0.001666	0.0362296
0.001669	0.036213
0.001671	0.0362006
0.001672	0.0361923
0.001673	0.036184
0.001674	0.0361757
0.001676	0.0361632
0.001679	0.0361466
0.00168	0.03613
0.001682	0.0361134
0.001684	0.0360968
0.001685	0.0360803
0.001691	0.0360637
0.001693	0.0360512
0.001694	0.0360346
0.001695	0.0360097
0.001697	0.035989
0.001698	0.0359724
0.0017	0.0359599
0.001701	0.0359433
0.001702	0.0359268
0.001704	0.0359185
0.001706	0.0359102
0.001707	0.0359019
0.001708	0.0358894
0.00171	0.0358687
0.001712	0.0358479
0.001714	0.0358313
0.001715	0.0358189
0.001717	0.0358106
0.001718	0.0358023
0.001721	0.035794
0.001724	0.0357857
0.001725	0.0357774
0.001726	0.0357691
0.001727	0.0357608
0.001728	0.0357525
0.00173	0.0357442
0.001731	0.0357318
0.001732	0.0357152
0.001734	0.0357027
0.001736	0.0356944
0.001738	0.0356861
0.001739	0.0356778
0.00174	0.0356695
0.001741	0.0356571
0.001742	0.0356446
0.001743	0.0356322
0.001744	0.0356198
0.001745	0.0356073
0.001746	0.0355949
0.001748	0.0355824
0.00175	0.03557
0.001751	0.0355617
0.001752	0.0355534
0.001754	0.0355409
0.001755	0.035516
0.001757	0.0354953
0.001758	0.0354829
0.001759	0.0354704
0.00176	0.0354621
0.001762	0.0354497
0.001763	0.0354372
0.001764	0.0354289
0.001766	0.0354165
0.001768	0.0353999
0.001769	0.0353874
0.00177	0.0353791
0.001771	0.0353667
0.001772	0.0353501
0.001775	0.0353377
0.001776	0.0353252
0.001777	0.0353128
0.001778	0.0353045
0.001781	0.0352962
0.001782	0.0352879
0.001783	0.0352796
0.001784	0.0352713
0.001787	0.035263
0.001788	0.0352547
0.001789	0.0352464
0.001791	0.0352339
0.001795	0.0352132
0.001796	0.0351925
0.001797	0.0351717
0.001798	0.035151
0.001799	0.0351302
0.0018	0.0351136
0.001804	0.0350929
0.001805	0.0350721
0.001807	0.0350638
0.001809	0.0350473
0.00181	0.0350265
0.001811	0.0350141
0.001813	0.0350016
0.001814	0.0349892
0.001815	0.0349809
0.001816	0.0349684
0.001817	0.0349435
0.001818	0.0349228
0.001819	0.0349103
0.00182	0.0348938
0.001823	0.0348772
0.001824	0.0348647
0.001825	0.0348564
0.001826	0.0348481
0.001828	0.0348357
0.00183	0.0348108
0.001831	0.0347817
0.001832	0.0347651
0.001833	0.0347569
0.001834	0.0347444
0.001835	0.034732
0.001836	0.0347195
0.001838	0.0347071
0.001841	0.0346988
0.001842	0.0346863
0.001843	0.0346739
0.001844	0.0346614
0.001846	0.034649
0.001848	0.0346365
0.001849	0.0346117
0.00185	0.0345909
0.001853	0.0345826
0.001854	0.0345743
0.001855	0.034566
0.001856	0.0345536
0.001857	0.0345411
0.001858	0.0345287
0.001861	0.0345162
0.001862	0.0344996
0.001864	0.034483
0.001867	0.0344706
0.001868	0.0344582
0.001872	0.0344457
0.001873	0.0344333
0.001876	0.034425
0.001877	0.0344167
0.001878	0.0344084
0.00188	0.0344001
0.001881	0.0343876
0.001882	0.0343752
0.001883	0.0343544
0.001884	0.0343295
0.001887	0.034313
0.001889	0.0342964
0.001891	0.0342798
0.001892	0.0342632
0.001893	0.0342507
0.001894	0.0342383
0.001895	0.0342258
0.001896	0.0342175
0.001897	0.0342092
0.001899	0.0342009
0.0019	0.0341926
0.001901	0.0341843
0.001902	0.034176
0.001903	0.0341678
0.001904	0.034147
0.001913	0.0341263
0.001914	0.034118
0.001915	0.0341055
0.001918	0.0340931
0.001919	0.0340848
0.00192	0.0340765
0.001921	0.0340599
0.001922	0.0340433
0.001923	0.034035
0.001924	0.0340267
0.001925	0.0340184
0.001926	0.0340101
0.001927	0.0339977
0.001928	0.0339852
0.001929	0.0339769
0.00193	0.0339686
0.001932	0.0339603
0.001933	0.033952
0.001934	0.0339396
0.001936	0.0339271
0.001937	0.0339188
0.001939	0.0339105
0.001941	0.0339022
0.001942	0.0338939
0.001943	0.0338774
0.001944	0.0338608
0.001945	0.0338483
0.001946	0.0338359
0.001947	0.0338276
0.001952	0.0338193
0.001953	0.0338068
0.001955	0.0337902
0.001958	0.0337778
0.001959	0.0337695
0.00196	0.0337612
0.001963	0.0337487
0.001964	0.033728
0.001965	0.0337073
0.001968	0.0336948
0.001969	0.0336865
0.00197	0.0336741
0.001971	0.0336616
0.001972	0.0336492
0.001973	0.0336367
0.001974	0.0336243
0.001976	0.0336118
0.001977	0.0336035
0.00198	0.0335911
0.001982	0.0335787
0.001984	0.0335662
0.001985	0.0335538
0.001986	0.0335455
0.001987	0.033533
0.001988	0.0335206
0.001989	0.0335081
0.001992	0.0334957
0.001994	0.0334874
0.001996	0.0334791
0.001998	0.0334708
0.002	0.0334583
0.002002	0.0334459
0.002003	0.0334376
0.002004	0.0334252
0.002005	0.0334044
0.002006	0.0333878
0.002007	0.0333795
0.00201	0.0333712
0.002012	0.0333588
0.002013	0.0333463
0.002014	0.0333339
0.002015	0.0333214
0.002017	0.033309
0.002018	0.0332883
0.002019	0.0332675
0.00202	0.0332551
0.002022	0.0332468
0.002025	0.0332302
0.002029	0.0332136
0.002031	0.0332053
0.002034	0.033197
0.002035	0.0331887
0.002036	0.0331804
0.002038	0.0331679
0.00204	0.0331513
0.002042	0.0331389
0.002043	0.0331223
0.002044	0.0331016
0.002045	0.0330891
0.002046	0.0330808
0.002047	0.0330725
0.002048	0.0330642
0.00205	0.0330559
0.002052	0.0330476
0.002053	0.0330393
0.002055	0.033031
0.002058	0.0330186
0.002059	0.0330061
0.00206	0.0329937
0.002061	0.0329813
0.002062	0.0329647
0.002063	0.0329439
0.002064	0.0329315
0.002065	0.0329232
0.002067	0.0329149
0.002068	0.0329066
0.002069	0.0328983
0.002071	0.03289
0.002073	0.0328817
0.002074	0.0328692
0.002075	0.0328568
0.002076	0.0328402
0.002079	0.0328195
0.002081	0.0328029
0.002082	0.0327904
0.00209	0.0327821
0.002091	0.0327738
0.002092	0.0327655
0.002093	0.0327572
0.002094	0.0327448
0.002097	0.0327323
0.0021	0.0327199
0.002101	0.0327033
0.002102	0.0326909
0.002103	0.0326826
0.002104	0.0326701
0.002105	0.0326535
0.002106	0.0326369
0.002109	0.0326245
0.00211	0.0326162
0.002111	0.0326079
0.002112	0.0325954
0.002113	0.0325664
0.002114	0.0325374
0.002115	0.0325249
0.002116	0.0325083
0.002117	0.0324917
0.002118	0.0324834
0.002121	0.032471
0.002122	0.0324502
0.002125	0.0324295
0.002127	0.0324088
0.002128	0.0323839
0.002129	0.0323673
0.00213	0.032359
0.002131	0.0323507
0.002134	0.0323382
0.002136	0.0323216
0.002137	0.0323092
0.002138	0.0322967
0.002139	0.0322843
0.002144	0.032276
0.002146	0.0322636
0.002147	0.032247
0.002152	0.0322345
0.002155	0.0322262
0.002159	0.0322179
0.00216	0.0322096
0.002161	0.0321972
0.002164	0.0321847
0.002165	0.0321764
0.002167	0.0321598
0.00217	0.0321391
0.002175	0.0321225
0.002177	0.0321101
0.002178	0.0321018
0.002179	0.0320935
0.00218	0.032081
0.002181	0.0320686
0.002182	0.0320603
0.002183	0.0320478
0.002185	0.0320354
0.002187	0.0320188
0.002188	0.0319939
0.002198	0.0319773
0.002199	0.0319649
0.0022	0.0319483
0.002202	0.0319317
0.002203	0.0319192
0.002205	0.0319109
0.002206	0.0318985
0.002207	0.031886
0.002208	0.0318777
0.00221	0.0318694
0.002212	0.0318611
0.002213	0.0318528
0.002214	0.0318445
0.002216	0.0318321
0.002219	0.0318155
0.00222	0.0317948
0.002221	0.0317782
0.002223	0.0317657
0.002225	0.0317533
0.002226	0.0317408
0.002229	0.0317284
0.002231	0.0317118
0.002234	0.031691
0.002235	0.0316745
0.002237	0.0316454
0.002239	0.0316205
0.002241	0.0316122
0.002242	0.0316039
0.002243	0.0315956
0.002244	0.0315832
0.002246	0.0315666
0.002248	0.0315541
0.002249	0.0315458
0.002251	0.0315375
0.002254	0.0315293
0.002255	0.031521
0.002256	0.0315044
0.002257	0.0314878
0.002262	0.0314795
0.002263	0.0314712
0.002264	0.0314629
0.002265	0.0314546
0.002267	0.0314463
0.002268	0.0314338
0.002272	0.0314214
0.002274	0.0314131
0.002275	0.0314048
0.002276	0.0313965
0.002277	0.0313799
0.002278	0.031355
0.002279	0.0313343
0.00228	0.0313218
0.002281	0.0313135
0.002283	0.0313052
0.002284	0.0312928
0.002286	0.0312762
0.00229	0.0312637
0.002291	0.0312513
0.002293	0.0312389
0.002294	0.0312306
0.002295	0.0312181
0.002297	0.0312057
0.002298	0.0311932
0.002299	0.0311766
0.0023	0.03116
0.002302	0.0311434
0.002303	0.0311268
0.002307	0.0311102
0.002308	0.0310978
0.002312	0.0310895
0.002313	0.0310771
0.002314	0.0310605
0.002316	0.031048
0.002317	0.0310397
0.002319	0.0310314
0.00232	0.0310231
0.002323	0.0310148
0.002324	0.0310024
0.002329	0.0309899
0.00233	0.0309816
0.002331	0.0309733
0.002334	0.030965
0.002335	0.0309567
0.002336	0.0309443
0.002341	0.0309277
0.002342	0.0309153
0.002343	0.0309028
0.002345	0.0308904
0.002346	0.0308821
0.002348	0.0308738
0.002349	0.0308655
0.00235	0.0308572
0.002351	0.0308489
0.002353	0.0308406
0.002354	0.0308281
0.002355	0.0308157
0.002356	0.0308074
0.002357	0.0307908
0.002359	0.0307742
0.00236	0.0307659
0.002362	0.0307535
0.002363	0.030741
0.002364	0.0307327
0.002365	0.0307244
0.002366	0.0307161
0.002367	0.0307078
0.00237	0.0306954
0.002371	0.0306829
0.002372	0.0306705
0.002374	0.030658
0.002375	0.0306415
0.002376	0.0306207
0.002378	0.0306041
0.00238	0.0305875
0.002381	0.0305751
0.002384	0.0305585
0.002385	0.0305419
0.002386	0.0305336
0.002387	0.0305253
0.002389	0.0305128
0.002392	0.0304963
0.002393	0.0304838
0.002394	0.0304755
0.002397	0.0304672
0.0024	0.0304589
0.002403	0.0304423
0.002405	0.0304257
0.002406	0.0304133
0.002407	0.0304008
0.002413	0.0303925
0.002414	0.0303842
0.002415	0.0303759
0.002416	0.0303594
0.002417	0.0303428
0.00242	0.0303345
0.002421	0.0303262
0.002425	0.0303179
0.002427	0.0303096
0.002428	0.0303013
0.002433	0.0302805
0.002436	0.0302473
0.002438	0.0302224
0.00244	0.0302059
0.002441	0.0301934
0.002442	0.0301768
0.002444	0.0301602
0.002448	0.0301519
0.002449	0.0301395
0.00245	0.030127
0.002452	0.0301187
0.002453	0.0301104
0.002454	0.030098
0.002457	0.0300855
[truncated: 3,266 more rows]

## Sheet: s=0.05
0	0.993931
9.99999e-07	0.856788
2e-06	0.660805
3e-06	0.561515
4e-06	0.502451
5e-06	0.460694
5.99999e-06	0.429741
6.99999e-06	0.405034
7.99999e-06	0.385171
8.99999e-06	0.369122
9.99999e-06	0.355176
1.1e-05	0.342775
1.2e-05	0.332152
1.3e-05	0.322374
1.4e-05	0.313791
1.5e-05	0.305996
1.6e-05	0.298744
1.7e-05	0.292346
1.8e-05	0.28651
1.9e-05	0.280755
2e-05	0.275453
2.1e-05	0.27069
2.2e-05	0.266227
2.3e-05	0.262075
2.4e-05	0.25817
2.5e-05	0.25458
2.6e-05	0.25118
2.7e-05	0.247928
2.8e-05	0.244705
2.9e-05	0.241606
3e-05	0.238731
3.1e-05	0.235837
3.2e-05	0.233119
3.3e-05	0.230664
3.4e-05	0.228428
3.5e-05	0.22633
3.6e-05	0.224266
3.7e-05	0.222306
3.8e-05	0.220442
3.9e-05	0.21874
4e-05	0.217066
4.1e-05	0.215364
4.2e-05	0.213504
4.3e-05	0.21174
4.4e-05	0.210167
4.5e-05	0.208617
4.6e-05	0.207168
4.7e-05	0.205709
4.8e-05	0.204193
4.9e-05	0.202753
5e-05	0.201485
5.09999e-05	0.200178
5.19999e-05	0.198829
5.29999e-05	0.19758
5.39999e-05	0.196364
5.49999e-05	0.195153
5.59999e-05	0.194085
5.69999e-05	0.193089
5.79999e-05	0.192092
5.89999e-05	0.191196
5.99999e-05	0.190266
6.09999e-05	0.189341
6.19999e-05	0.188454
6.29999e-05	0.187515
6.39999e-05	0.18658
6.49999e-05	0.185779
6.59999e-05	0.184935
6.69999e-05	0.184044
6.79999e-05	0.18321
6.89999e-05	0.182304
6.99999e-05	0.181436
7.09999e-05	0.180602
7.19999e-05	0.179824
7.29999e-05	0.179085
7.39999e-05	0.17826
7.49999e-05	0.177464
7.59999e-05	0.176711
7.69999e-05	0.175996
7.79999e-05	0.175323
7.89999e-05	0.174565
7.99999e-05	0.173812
8.09999e-05	0.173121
8.19999e-05	0.172444
8.29999e-05	0.171824
8.39999e-05	0.171266
8.49999e-05	0.170689
8.59999e-05	0.170127
8.69999e-05	0.169497
8.79999e-05	0.168801
8.89999e-05	0.168172
8.99999e-05	0.167623
9.09999e-05	0.167047
9.19999e-05	0.166431
9.29999e-05	0.165921
9.39999e-05	0.165445
9.49999e-05	0.164958
9.59999e-05	0.164529
9.69999e-05	0.164114
9.79999e-05	0.163709
9.89999e-05	0.163247
9.99999e-05	0.16277
0.000101	0.162307
0.000102	0.161788
0.000103	0.16132
0.000104	0.160925
0.000105	0.160596
0.000106	0.1603
0.000107	0.159947
0.000108	0.159542
0.000109	0.159141
0.00011	0.15875
0.000111	0.158312
0.000112	0.157864
0.000113	0.157487
0.000114	0.157134
0.000115	0.156767
0.000116	0.156381
0.000117	0.15598
0.000118	0.155542
0.000119	0.155117
0.00012	0.154765
0.000121	0.154436
0.000122	0.15413
0.000123	0.153863
0.000124	0.153573
0.000125	0.153215
0.000126	0.152862
0.000127	0.1525
0.000128	0.152137
0.000129	0.151804
0.00013	0.151484
0.000131	0.151189
0.000132	0.150826
0.000133	0.150478
0.000134	0.150206
0.000135	0.149959
0.000136	0.149668
0.000137	0.149348
0.000138	0.149053
0.000139	0.148747
0.00014	0.1485
0.000141	0.148223
0.000142	0.147851
0.000143	0.147536
0.000144	0.147293
0.000145	0.147084
0.000146	0.146874
0.000147	0.146611
0.000148	0.146302
0.000149	0.146039
0.00015	0.14582
0.000151	0.145534
0.000152	0.145234
0.000153	0.144962
0.000154	0.144704
0.000155	0.144409
0.000156	0.144104
0.000157	0.143841
0.000158	0.143584
0.000159	0.143269
0.00016	0.142921
0.000161	0.14264
0.000162	0.142359
0.000163	0.142058
0.000164	0.141801
0.000165	0.141543
0.000166	0.141291
0.000167	0.141071
0.000168	0.140842
0.000169	0.140614
0.00017	0.14037
0.000171	0.140161
0.000172	0.13996
0.000173	0.139698
0.000174	0.139469
0.000175	0.139221
0.000176	0.13893
0.000177	0.138702
0.000178	0.138516
0.000179	0.138315
0.00018	0.138125
0.000181	0.137939
0.000182	0.137715
0.000183	0.137448
0.000184	0.137171
0.000185	0.13699
0.000186	0.136856
0.000187	0.13668
0.000188	0.136489
0.000189	0.136275
0.00019	0.136079
0.000191	0.13587
0.000192	0.135598
0.000193	0.135369
0.000194	0.135192
0.000195	0.135011
0.000196	0.134797
0.000197	0.134544
0.000198	0.13431
0.000199	0.134096
0.0002	0.133891
0.000201	0.133667
0.000202	0.133414
0.000203	0.133247
0.000204	0.133118
0.000205	0.13298
0.000206	0.132799
0.000207	0.132604
0.000208	0.132451
0.000209	0.132265
0.00021	0.132065
0.000211	0.131884
0.000212	0.131736
0.000213	0.131607
0.000214	0.131497
0.000215	0.131378
0.000216	0.131249
0.000217	0.131106
0.000218	0.130954
0.000219	0.130835
0.00022	0.130687
0.000221	0.130544
0.000222	0.13041
0.000223	0.130248
0.000224	0.130119
0.000225	0.129986
0.000226	0.129814
0.000227	0.129628
0.000228	0.129476
0.000229	0.129357
0.00023	0.129161
0.000231	0.12897
0.000232	0.128846
0.000233	0.128661
0.000234	0.12847
0.000235	0.128308
0.000236	0.128131
0.000237	0.127988
0.000238	0.12786
0.000239	0.12775
0.00024	0.127607
0.000241	0.127459
0.000242	0.127354
0.000243	0.127202
0.000244	0.127035
0.000245	0.126863
0.000246	0.126706
0.000247	0.126591
0.000248	0.126439
0.000249	0.126258
0.00025	0.126091
0.000251	0.125919
0.000252	0.125757
0.000253	0.125628
0.000254	0.125528
0.000255	0.125452
0.000256	0.125366
0.000257	0.125256
0.000258	0.125147
0.000259	0.125061
0.00026	0.124937
0.000261	0.12477
0.000262	0.124627
0.000263	0.124503
0.000264	0.124384
0.000265	0.124226
0.000266	0.124064
0.000267	0.12394
0.000268	0.12384
0.000269	0.12374
0.00027	0.123602
0.000271	0.123497
0.000272	0.123392
0.000273	0.123287
0.000274	0.123173
0.000275	0.123015
0.000276	0.122906
0.000277	0.122825
0.000278	0.12272
0.000279	0.122591
0.00028	0.122491
0.000281	0.122415
0.000282	0.122315
0.000283	0.122181
0.000284	0.122043
0.000285	0.121914
0.000286	0.121776
0.000287	0.121666
0.000288	0.121571
0.000289	0.121452
0.00029	0.121356
0.000291	0.121275
0.000292	0.121199
0.000293	0.121132
0.000294	0.121061
0.000295	0.121003
0.000296	0.120937
0.000297	0.120803
0.000298	0.120674
0.000299	0.120569
0.0003	0.12045
0.000301	0.120345
0.000302	0.120255
0.000303	0.120155
0.000304	0.12005
0.000305	0.11995
0.000306	0.11985
0.000307	0.119759
0.000308	0.119673
0.000309	0.119578
0.00031	0.119473
0.000311	0.119378
0.000312	0.119311
0.000313	0.119239
0.000314	0.119158
0.000315	0.119101
0.000316	0.119039
0.000317	0.118939
0.000318	0.118844
0.000319	0.118753
0.00032	0.118634
0.000321	0.118534
0.000322	0.1184
0.000323	0.118262
0.000324	0.118166
0.000325	0.118066
0.000326	0.117971
0.000327	0.117899
0.000328	0.117823
0.000329	0.117728
0.00033	0.117647
0.000331	0.11757
0.000332	0.11747
0.000333	0.117361
0.000334	0.117251
0.000335	0.117156
0.000336	0.11706
0.000337	0.116975
0.000338	0.116913
0.000339	0.116846
0.00034	0.116784
0.000341	0.116717
0.000342	0.116607
0.000343	0.116498
0.000344	0.116388
0.000345	0.116278
0.000346	0.116188
0.000347	0.116102
0.000348	0.116026
0.000349	0.115935
0.00035	0.115854
0.000351	0.115744
0.000352	0.115625
0.000353	0.115539
0.000354	0.115449
0.000355	0.115349
0.000356	0.115268
0.000357	0.11522
0.000358	0.11511
0.000359	0.114996
0.00036	0.11492
0.000361	0.114786
0.000362	0.114672
0.000363	0.1146
0.000364	0.11451
0.000365	0.114438
0.000366	0.114386
0.000367	0.114314
0.000368	0.114252
0.000369	0.114181
0.00037	0.114109
0.000371	0.114052
0.000372	0.113985
0.000373	0.113909
0.000374	0.113837
0.000375	0.113766
0.000376	0.113694
0.000377	0.113632
0.000378	0.11357
0.000379	0.113499
0.00038	0.113427
0.000381	0.113351
0.000382	0.113275
0.000383	0.113203
0.000384	0.113127
0.000385	0.113036
0.000386	0.112955
0.000387	0.112898
0.000388	0.112841
0.000389	0.112793
0.00039	0.112745
0.000391	0.112683
0.000392	0.112617
0.000393	0.112559
0.000394	0.112507
0.000395	0.112431
0.000396	0.112345
0.000397	0.112283
0.000398	0.112235
0.000399	0.112188
0.0004	0.112121
0.000401	0.112035
0.000402	0.111954
0.000403	0.111887
0.000404	0.111816
0.000405	0.111758
0.000406	0.111716
0.000407	0.111668
0.000408	0.111601
0.000409	0.111496
0.00041	0.111377
0.000411	0.111272
0.000412	0.111201
0.000413	0.111143
0.000414	0.111091
0.000415	0.111005
0.000416	0.110929
0.000417	0.110891
0.000418	0.110834
0.000419	0.110772
0.00042	0.11071
0.000421	0.110667
0.000422	0.110638
0.000423	0.110586
0.000424	0.110524
0.000425	0.110447
0.000426	0.110371
0.000427	0.110328
0.000428	0.110238
0.000429	0.110128
0.00043	0.110071
0.000431	0.110013
0.000432	0.109932
0.000433	0.10987
0.000434	0.109832
0.000435	0.109794
0.000436	0.109746
0.000437	0.10967
0.000438	0.109603
0.000439	0.109532
0.00044	0.10947
0.000441	0.109413
0.000442	0.109341
0.000443	0.109289
0.000444	0.109212
0.000445	0.109103
0.000446	0.109003
0.000447	0.108917
0.000448	0.108855
0.000449	0.108817
0.00045	0.108779
0.000451	0.10874
0.000452	0.108674
0.000453	0.108593
0.000454	0.10854
0.000455	0.108493
0.000456	0.108431
0.000457	0.108354
0.000458	0.108297
0.000459	0.108264
0.00046	0.108226
0.000461	0.108168
0.000462	0.108097
0.000463	0.108016
0.000464	0.107939
0.000465	0.107892
0.000466	0.107839
0.000467	0.107758
0.000468	0.107649
0.000469	0.107568
0.00047	0.107501
0.000471	0.10742
0.000472	0.107348
0.000473	0.107301
0.000474	0.107281
0.000475	0.107248
0.000476	0.1072
0.000477	0.107162
0.000478	0.107134
0.000479	0.107086
0.00048	0.107043
0.000481	0.10701
0.000482	0.106976
0.000483	0.106957
0.000484	0.10691
0.000485	0.106833
0.000486	0.106781
0.000487	0.106733
0.000488	0.106681
0.000489	0.106633
0.00049	0.106566
0.000491	0.106523
0.000492	0.106495
0.000493	0.106438
0.000494	0.106385
0.000495	0.106333
0.000496	0.106266
0.000497	0.106204
0.000498	0.106142
0.000499	0.106085
0.0005	0.106042
0.000501999	0.105994
0.000502999	0.105932
0.000503999	0.105894
0.000504999	0.10587
0.000505999	0.105813
0.000506999	0.105741
0.000507999	0.105665
0.000508999	0.105603
0.000509999	0.10557
0.000510999	0.105522
0.000511999	0.105479
0.000512999	0.105446
0.000513999	0.105417
0.000514999	0.105393
0.000515999	0.105346
0.000516999	0.105284
0.000517999	0.105227
0.000518999	0.105179
0.000519999	0.105136
0.000520999	0.105088
0.000521999	0.105031
0.000522999	0.104974
0.000523999	0.104898
0.000524999	0.104831
0.000525999	0.104759
0.000526999	0.104673
0.000527999	0.104602
0.000528999	0.104535
0.000529999	0.104492
0.000530999	0.104454
0.000531999	0.104402
0.000532999	0.104349
0.000533999	0.104297
0.000534999	0.104235
0.000535999	0.104192
0.000536999	0.104163
0.000537999	0.104106
0.000538999	0.104054
0.000539999	0.104011
0.000540999	0.103973
0.000541999	0.103944
0.000542999	0.103911
0.000543999	0.103887
0.000544999	0.103858
0.000545999	0.103815
0.000548999	0.103753
0.000549999	0.103682
0.000550999	0.103615
0.000551999	0.103558
0.000552999	0.103524
0.000553999	0.103505
0.000554999	0.103491
0.000555999	0.103477
0.000556999	0.103448
0.000557999	0.103396
0.000558999	0.103329
0.000559999	0.103267
0.000560999	0.103214
0.000561999	0.103172
0.000562999	0.103138
0.000563999	0.103095
0.000564999	0.103038
0.000565999	0.102986
0.000566999	0.102938
0.000567999	0.102876
0.000568999	0.102824
0.000569999	0.102804
0.000570999	0.102781
0.000571999	0.102714
0.000572999	0.102647
0.000573999	0.102619
0.000574999	0.102585
0.000575999	0.102528
0.000576999	0.102456
0.000577999	0.10239
0.000578999	0.102328
0.000579999	0.102261
0.000580999	0.102204
0.000581999	0.102156
0.000582999	0.102104
0.000583999	0.102056
0.000584999	0.102023
0.000585999	0.101994
0.000586999	0.101975
0.000587999	0.101951
0.000588999	0.101922
0.000589999	0.101889
0.000590999	0.101837
0.000591999	0.101794
0.000592999	0.101765
0.000593999	0.101732
0.000594999	0.101698
0.000595999	0.10167
0.000596999	0.101641
0.000597999	0.101598
0.000598999	0.101536
0.000599999	0.101498
0.000600999	0.10146
0.000601999	0.101412
0.000602999	0.101384
0.000604999	0.101355
0.000605999	0.101326
0.000606999	0.101298
0.000607999	0.10126
0.000608999	0.101207
0.000609999	0.10116
0.000610999	0.101121
0.000611999	0.101083
0.000612999	0.101059
0.000613999	0.101031
0.000614999	0.100997
0.000615999	0.100964
0.000616999	0.100921
0.000617999	0.100893
0.000618999	0.100869
0.000619999	0.100835
0.000620999	0.100797
0.000621999	0.100759
0.000622999	0.100726
0.000623999	0.100707
0.000624999	0.100683
0.000625999	0.100654
0.000626999	0.100611
0.000627999	0.100559
0.000628999	0.100521
0.000629999	0.100487
0.000630999	0.100468
0.000631999	0.100449
0.000632999	0.100397
0.000633999	0.10033
0.000634999	0.100297
0.000635999	0.100273
0.000636999	0.100249
0.000637999	0.100225
0.000638999	0.100187
0.000639999	0.100154
0.000640999	0.100125
0.000641999	0.100096
0.000642999	0.100063
0.000643999	0.0999914
0.000644999	0.0999199
0.000645999	0.0998818
0.000646999	0.0998388
0.000647999	0.0997864
0.000648999	0.0997387
0.000649999	0.0997053
0.000650999	0.099672
0.000651999	0.0996481
0.000652999	0.0996291
0.000653999	0.0995909
0.000654999	0.099548
0.000655999	0.0995146
0.000656999	0.099486
0.000657999	0.0994622
0.000658999	0.0994431
0.000659999	0.0994097
0.000660999	0.0993716
0.000661999	0.0993335
0.000662999	0.0993001
0.000663999	0.0992619
0.000664999	0.0992095
0.000665999	0.0991618
0.000666999	0.0991237
0.000667999	0.0990951
0.000668999	0.0990522
0.000669999	0.0990188
0.000670999	0.0989902
0.000671999	0.0989377
0.000672999	0.0988805
0.000673999	0.0988471
0.000674999	0.0988328
0.000675999	0.0987995
0.000676999	0.0987613
0.000677999	0.0987232
0.000678999	0.0986755
0.000679999	0.0986278
0.000680999	0.0985992
0.000681999	0.0985801
0.000682999	0.0985515
0.000683999	0.0985277
0.000684999	0.0984991
0.000685999	0.0984562
0.000686999	0.0984037
0.000687999	0.0983656
0.000688999	0.0983322
0.000689999	0.0982893
0.000690999	0.0982559
0.000691999	0.0982273
0.000692999	0.0981987
0.000693999	0.0981749
0.000694999	0.0981558
0.000696999	0.0981367
0.000697999	0.0981033
0.000698999	0.0980747
0.000699999	0.0980509
0.000700999	0.0980175
0.000701999	0.0979842
0.000702999	0.0979508
0.000703999	0.0979222
0.000704999	0.0978793
0.000705999	0.0978316
0.000706999	0.097803
0.000707999	0.0977696
0.000708999	0.0977315
0.000709999	0.0976933
0.000710999	0.0976552
0.000711999	0.0976123
0.000712999	0.0975646
0.000713999	0.0975264
0.000714999	0.0974978
0.000715999	0.0974645
0.000716999	0.0974215
0.000717999	0.0973977
0.000718999	0.0973786
0.000719999	0.0973453
0.000720999	0.0973214
0.000721999	0.0972976
0.000722999	0.0972642
0.000723999	0.0972356
0.000724999	0.0972022
0.000725999	0.097145
0.000726999	0.0970878
0.000727999	0.0970497
0.000728999	0.0970258
0.000729999	0.0970115
0.000730999	0.0969972
0.000731999	0.0969829
0.000732999	0.0969686
0.000733999	0.0969257
0.000734999	0.0968685
0.000735999	0.0968446
0.000736999	0.096816
0.000737999	0.0967588
0.000738999	0.0967159
0.000739999	0.0966873
0.000740999	0.0966539
0.000741999	0.0966301
0.000742999	0.0965872
0.000743999	0.0965395
0.000744999	0.0965157
0.000745999	0.0964918
0.000746999	0.0964584
0.000747999	0.0964251
0.000748999	0.0963917
0.000749999	0.0963488
0.000750999	0.0962963
0.000751999	0.0962487
0.000752999	0.0962057
0.000753999	0.0961581
0.000754999	0.0961247
0.000755999	0.0961056
0.000756999	0.0960818
0.000757999	0.0960389
0.000758999	0.0960007
0.000759999	0.0959769
0.000760999	0.095953
0.000761999	0.0959292
0.000764999	0.0959054
0.000765999	0.0958768
0.000766999	0.0958434
0.000767999	0.0958148
0.000768999	0.0957909
0.000769999	0.0957719
0.000770999	0.095729
0.000771999	0.0956765
0.000772999	0.0956431
0.000773999	0.0956241
0.000774999	0.095605
0.000776999	0.0955669
0.000777999	0.0955239
0.000778999	0.0954906
0.000779999	0.0954715
0.000781999	0.0954524
0.000782999	0.0954238
0.000783999	0.0954
0.000784999	0.0953666
0.000785999	0.095338
0.000786999	0.0953189
0.000787999	0.0952808
0.000788999	0.0952426
0.000789999	0.095214
0.000790999	0.0951616
0.000791999	0.0951187
0.000792999	0.0951044
0.000793999	0.0950901
0.000794999	0.0950662
0.000795999	0.0950329
0.000796999	0.0949947
0.000797999	0.0949661
0.000798999	0.0949375
0.000799999	0.0949089
0.000800999	0.0948946
0.000801999	0.0948707
0.000802999	0.0948326
0.000803999	0.0947802
0.000804999	0.0947372
0.000805999	0.0947086
0.000806999	0.0946848
0.000807999	0.0946562
0.000808999	0.0946085
0.000809999	0.0945704
0.000810999	0.094537
0.000811999	0.0945084
0.000812999	0.0944893
0.000813999	0.0944559
0.000814999	0.0944226
0.000815999	0.0943844
0.000816999	0.094351
0.000817999	0.0943367
0.000818999	0.0943034
0.000819999	0.0942557
0.000820999	0.0942271
0.000822999	0.0942128
0.000823999	0.0941937
0.000824999	0.0941651
0.000825999	0.094127
0.000826999	0.0940984
0.000827999	0.094084
0.000828999	0.0940697
0.000829999	0.0940459
0.000830999	0.0940125
0.000831999	0.0939792
0.000832999	0.093941
0.000833999	0.0939124
0.000834999	0.0938933
0.000835999	0.0938647
0.000836999	0.0938409
0.000837999	0.093817
0.000838999	0.0937932
0.000839999	0.0937837
0.000840999	0.0937741
0.000841999	0.0937646
0.000842999	0.0937408
0.000843999	0.0936979
0.000845999	0.0936502
0.000846999	0.093612
0.000847999	0.0935787
0.000848999	0.0935548
0.000849999	0.0935357
0.000851999	0.0934928
0.000852999	0.0934499
0.000853999	0.0934213
0.000854999	0.0933975
0.000856999	0.0933593
0.000857999	0.0933164
0.000858999	0.0932878
0.000859999	0.0932592
0.000860999	0.0932258
0.000861999	0.0931829
0.000862999	0.0931448
0.000863999	0.0931019
0.000864999	0.0930685
0.000865999	0.093059
0.000866999	0.0930447
0.000867999	0.0930256
0.000868999	0.0930017
0.000869999	0.0929731
0.000870999	0.092935
0.000871999	0.0928873
0.000873999	0.0928492
0.000875999	0.0928301
0.000876999	0.0928158
0.000878999	0.0927872
0.000879999	0.0927634
0.000880999	0.0927538
0.000881999	0.0927252
0.000882999	0.0926918
0.000883999	0.0926632
0.000884999	0.0926346
0.000885999	0.0926108
0.000886999	0.0925869
0.000887999	0.0925679
0.000888999	0.092544
0.000889999	0.0925154
0.000890999	0.0924964
0.000891999	0.0924868
0.000892999	0.0924582
0.000893999	0.0924248
0.000894999	0.0924105
0.000895999	0.092401
0.000896999	0.0923819
0.000897999	0.0923629
0.000898999	0.0923533
0.000899999	0.0923295
0.000901999	0.0922961
0.000903999	0.0922675
0.000904999	0.0922341
0.000905999	0.0922055
0.000906999	0.0921864
0.000907999	0.0921626
0.000908999	0.0921388
0.000909999	0.0921245
0.000910999	0.0921149
0.000911999	0.0920863
0.000912999	0.0920577
0.000913999	0.0920482
0.000914999	0.0920243
0.000915999	0.091991
0.000917999	0.0919624
0.000918999	0.0919194
0.000919999	0.0918765
0.000920999	0.0918527
0.000921999	0.0918384
0.000922999	0.0918241
0.000923999	0.091805
0.000924999	0.0917859
0.000925999	0.0917669
0.000926999	0.091743
0.000927999	0.0917144
0.000928999	0.0916954
0.000929999	0.091681
0.000930999	0.0916524
0.000931999	0.0916191
0.000932999	0.0915952
0.000933999	0.0915762
0.000934999	0.0915475
0.000935999	0.0914999
0.000936999	0.0914522
0.000937999	0.0914188
0.000938999	0.0913854
0.000940999	0.0913521
0.000941999	0.0913187
0.000942999	0.0912806
0.000943999	0.0912567
0.000944999	0.0912424
0.000945999	0.0912281
0.000946999	0.0912186
0.000947999	0.0911995
0.000948999	0.0911709
0.000949999	0.0911471
0.000950999	0.0911327
0.000951999	0.0911089
0.000952999	0.0910803
0.000953999	0.0910517
0.000955999	0.0910279
0.000956999	0.0910136
0.000957999	0.0909897
0.000958999	0.0909563
0.000959999	0.0909325
0.000960999	0.0908991
0.000961999	0.0908657
0.000962999	0.0908419
0.000963999	0.0908133
0.000964999	0.0907847
0.000966999	0.0907609
0.000969999	0.0907513
0.000970999	0.0907418
0.000971999	0.0907227
0.000972999	0.0907036
0.000973999	0.0906941
0.000974999	0.090675
0.000975999	0.0906369
0.000976999	0.0906083
0.000978999	0.0905987
0.000979999	0.0905749
0.000980999	0.0905415
0.000981999	0.0905225
0.000982999	0.0904986
0.000983999	0.09047
0.000984999	0.0904414
0.000985999	0.0904033
0.000986999	0.0903699
0.000987999	0.0903508
0.000988999	0.0903365
0.000989999	0.0903174
0.000990999	0.0902984
0.000991999	0.0902745
0.000992999	0.0902555
0.000993999	0.0902316
0.000994999	0.0901982
0.000995999	0.0901792
0.000996999	0.0901696
0.000997999	0.0901458
0.000998999	0.0901124
0.001001	0.0900934
0.001002	0.0900743
0.001003	0.0900552
0.001004	0.0900409
0.001005	0.0900218
0.001006	0.0899932
0.001007	0.0899646
0.001008	0.0899408
0.001009	0.0899169
0.00101	0.0898979
0.001011	0.089874
0.001012	0.0898454
0.001013	0.0898121
0.001014	0.0897787
0.001016	0.0897501
0.001017	0.089731
0.001018	0.0897119
0.001019	0.0896786
0.00102	0.0896452
0.001021	0.089607
0.001022	0.0895737
0.001023	0.0895498
0.001024	0.0895212
0.001025	0.0894926
0.001026	0.0894592
0.001027	0.0894306
0.001028	0.0894068
0.001029	0.0893877
0.00103	0.0893734
0.001031	0.0893543
0.001032	0.0893305
0.001033	0.0893019
0.001034	0.0892781
0.001035	0.0892637
0.001036	0.0892399
0.001038	0.0892161
0.001039	0.0892065
0.00104	0.0891922
0.001041	0.0891779
0.001042	0.0891589
0.001043	0.0891159
0.001044	0.0890826
0.001045	0.0890683
0.001049	0.089054
0.00105	0.0890397
0.001051	0.0890254
0.001052	0.0890015
0.001053	0.0889777
0.001054	0.0889634
0.001055	0.0889443
0.001056	0.08893
0.001057	0.0889157
0.001058	0.0888871
0.001059	0.0888585
0.00106	0.0888394
0.001061	0.0888108
0.001062	0.088787
0.001063	0.0887774
0.001065	0.0887631
0.001066	0.0887441
0.001067	0.0887202
0.001069	0.0887011
0.00107	0.0886821
0.001071	0.0886439
0.001072	0.0886106
0.001073	0.0885867
0.001075	0.0885629
0.001076	0.0885438
0.001077	0.0885247
0.001078	0.0884961
0.001079	0.0884675
0.00108	0.0884532
0.001083	0.0884437
0.001084	0.0884341
0.001085	0.0884246
0.001086	0.0884103
0.001087	0.0883769
0.001089	0.0883483
0.00109	0.0883292
0.001091	0.0883006
0.001092	0.088272
0.001093	0.0882434
0.001094	0.0882196
0.001095	0.0882053
0.001096	0.0881862
0.001097	0.0881671
0.001099	0.0881481
0.0011	0.0881242
0.001101	0.0881099
0.001102	0.0880956
0.001103	0.088067
0.001104	0.0880432
0.001105	0.0880289
0.001107	0.0880146
0.001108	0.088005
0.001109	0.0879907
0.00111	0.0879717
0.001112	0.0879478
0.001113	0.087924
0.001114	0.0878954
0.001116	0.0878715
0.001117	0.0878572
0.001119	0.0878429
0.001121	0.0878286
0.001122	0.0878096
0.001123	0.0877762
0.001124	0.0877476
0.001125	0.0877237
0.001126	0.0876999
0.001127	0.0876904
0.001128	0.0876761
0.001129	0.0876617
0.00113	0.0876522
0.001132	0.0876236
0.001133	0.0875807
0.001134	0.0875569
0.001135	0.0875378
0.001136	0.0875092
0.001137	0.0874853
0.001138	0.0874663
0.001139	0.087452
0.001143	0.0874424
0.001144	0.0874091
0.001146	0.0873709
0.001147	0.0873566
0.001148	0.0873375
0.001149	0.0873089
0.00115	0.0872803
0.001151	0.0872517
0.001152	0.0872326
0.001153	0.0872231
0.001154	0.0872136
0.001155	0.0871945
0.001156	0.0871659
0.001157	0.0871468
0.001158	0.0871373
0.001159	0.0871134
0.00116	0.0870658
0.001161	0.0870229
0.001162	0.086999
0.001163	0.0869847
0.001164	0.0869704
0.001165	0.0869513
0.001166	0.0869275
0.001167	0.0869084
0.001168	0.0868989
0.001171	0.0868846
0.001172	0.0868655
0.001173	0.0868464
0.001174	0.0868321
0.001175	0.0868226
0.001176	0.0868131
0.001178	0.086794
0.001179	0.0867749
0.00118	0.0867654
0.001181	0.0867559
0.001182	0.0867463
0.001183	0.086732
0.001184	0.0867034
0.001185	0.0866748
0.001187	0.0866557
0.001188	0.0866414
0.001189	0.0866224
0.001191	0.0866033
0.001193	0.0865938
0.001194	0.0865842
0.001195	0.0865747
0.001196	0.0865651
0.001197	0.0865413
0.001198	0.0865127
0.0012	0.0864936
0.001201	0.0864793
0.001202	0.086465
0.001203	0.0864412
0.001204	0.0864173
0.001205	0.0863935
0.001206	0.0863649
0.001207	0.0863363
0.001208	0.0863124
0.001209	0.0862981
0.00121	0.0862886
0.001211	0.0862648
0.001212	0.0862314
0.001213	0.0862076
0.001214	0.0861933
0.001216	0.0861742
0.001217	0.0861408
0.001218	0.086117
0.001219	0.0861074
0.00122	0.0860979
0.001221	0.0860836
0.001222	0.0860645
0.001223	0.0860264
0.001225	0.0859739
0.001229	0.0859358
0.00123	0.0859072
0.001231	0.0858786
0.001232	0.0858547
0.001233	0.0858357
0.001234	0.0858214
0.001236	0.0858071
0.001237	0.085788
0.001239	0.0857689
0.00124	0.0857498
0.001241	0.0857212
0.001242	0.0856879
0.001243	0.0856688
0.001244	0.0856497
0.001245	0.0856259
0.001247	0.0856068
0.001248	0.0855877
0.001249	0.0855639
0.001252	0.0855448
0.001254	0.0855353
0.001255	0.0855162
0.001256	0.0854971
0.001257	0.0854876
0.001259	0.0854638
0.00126	0.0854352
0.001261	0.0854066
0.001265	0.0853827
0.001267	0.0853636
0.001269	0.0853446
0.00127	0.0853207
0.001272	0.0852874
0.001273	0.085254
0.001274	0.0852254
0.001275	0.0852111
0.001277	0.0852015
0.001278	0.085192
0.001279	0.0851825
0.001281	0.0851586
0.001282	0.0851348
0.001283	0.0851109
0.001284	0.0850776
0.001285	0.085049
0.001287	0.0850156
0.001288	0.084987
0.00129	0.0849727
0.001291	0.0849536
0.001292	0.084925
0.001293	0.0849059
0.001294	0.0848964
0.001295	0.0848869
0.001297	0.0848726
0.001299	0.0848535
0.0013	0.0848344
0.001301	0.0848153
0.001302	0.0847963
0.001303	0.0847772
0.001304	0.0847629
0.001305	0.0847534
0.001306	0.0847438
0.001307	0.08472
0.001308	0.0846914
0.00131	0.0846771
0.001311	0.084658
0.001313	0.0846294
0.001314	0.0846008
0.001316	0.0845674
0.001318	0.084534
0.001319	0.084515
0.00132	0.0845054
0.001321	0.0844959
0.001322	0.0844816
0.001323	0.0844625
0.001325	0.0844339
0.001326	0.0844053
0.001327	0.0843862
0.001328	0.0843719
0.001329	0.0843481
0.001331	0.0843195
0.001332	0.0842956
0.001333	0.0842718
0.001334	0.0842527
0.001335	0.0842384
0.001336	0.0842289
0.001338	0.0842003
0.001342	0.0841717
0.001343	0.0841621
0.001344	0.0841526
0.001345	0.0841335
0.001346	0.0841049
0.001351	0.0840859
0.001353	0.0840763
0.001354	0.0840573
0.001355	0.0840334
0.001356	0.0840191
0.001357	0.0840096
0.001358	0.0839905
0.001359	0.0839667
0.00136	0.0839476
0.001361	0.0839333
0.001362	0.083919
0.001363	0.0839047
0.001364	0.0838904
0.001365	0.0838713
0.001366	0.083857
0.001367	0.0838332
0.001368	0.0837998
0.001369	0.0837807
0.00137	0.0837712
0.001371	0.0837616
0.001372	0.0837283
0.001373	0.0836949
0.001374	0.0836854
0.001375	0.0836711
0.001376	0.083652
0.001377	0.0836329
0.001378	0.0836091
0.00138	0.0835852
0.001381	0.0835709
0.001382	0.0835471
0.001383	0.0835233
0.001384	0.0835137
0.001385	0.0834899
0.001389	0.0834613
0.001391	0.083447
0.001393	0.0834374
0.001394	0.0834279
0.001396	0.0834184
0.001397	0.0834041
0.001398	0.0833898
0.001399	0.0833802
0.0014	0.0833707
0.001401	0.0833611
0.001402	0.0833468
0.001403	0.083323
0.001405	0.0832992
0.001406	0.0832753
0.001407	0.0832563
0.001408	0.0832467
0.001409	0.0832372
0.00141	0.0832229
0.001412	0.083199
0.001413	0.0831752
0.001414	0.0831609
0.001415	0.0831514
0.001416	0.0831371
0.001418	0.0831228
0.00142	0.0831037
0.001421	0.0830798
0.001422	0.0830655
0.001423	0.0830512
0.001424	0.0830226
0.001425	0.0829988
0.001426	0.0829893
0.001428	0.0829654
0.00143	0.0829416
0.001431	0.0829225
0.001433	0.0828891
0.001434	0.0828653
0.001435	0.0828558
0.001437	0.0828462
0.00144	0.0828224
0.001441	0.0827985
0.001442	0.0827795
0.001443	0.0827509
0.001445	0.082727
0.001446	0.0827079
0.001447	0.0826936
0.00145	0.0826698
0.001451	0.0826412
0.001453	0.0826269
0.001455	0.0826126
0.001456	0.0825983
0.001457	0.0825888
0.001459	0.0825792
0.001461	0.0825601
0.001462	0.0825363
0.001463	0.082522
0.001466	0.0825125
0.001467	0.0824934
0.001468	0.0824743
0.001472	0.0824648
0.001473	0.0824505
0.001474	0.0824362
0.001477	0.0824266
0.001479	0.0824171
0.00148	0.0824076
0.001481	0.0823837
0.001482	0.0823551
0.001483	0.0823218
0.001484	0.0822884
0.001486	0.0822741
0.001487	0.082255
0.001488	0.0822359
0.001491	0.0822216
0.001492	0.0822073
0.001493	0.0821883
0.001494	0.0821692
0.001495	0.0821549
0.001496	0.0821406
0.001497	0.0821263
0.001498	0.082112
0.0015	0.0821024
0.001502	0.0820881
0.001503	0.0820738
0.001504	0.0820643
0.001505	0.0820452
0.001507	0.0820214
0.001508	0.0819975
0.001509	0.0819785
0.00151	0.0819689
0.001511	0.0819594
0.001512	0.0819499
0.001513	0.0819308
0.001515	0.0819022
0.001516	0.0818783
0.001517	0.081864
0.001518	0.0818545
0.00152	0.081845
0.001522	0.0818307
0.001523	0.0818164
0.001524	0.0817925
0.001525	0.0817639
0.001526	0.0817496
0.001527	0.0817401
0.00153	0.0817305
0.001532	0.081721
0.001534	0.0817115
0.001535	0.0816876
0.001536	0.0816638
0.001537	0.0816447
0.001538	0.0816209
0.001539	0.0816066
0.00154	0.081597
0.001541	0.0815827
0.001542	0.0815637
0.001543	0.0815398
0.001545	0.0815112
0.001547	0.0814921
0.001548	0.0814778
0.001549	0.0814588
0.00155	0.0814445
0.001551	0.0814254
0.001554	0.0814063
0.001555	0.0813968
0.001556	0.0813825
0.001557	0.0813682
0.001558	0.0813539
0.001559	0.0813348
0.00156	0.0813157
0.001561	0.0813014
0.001562	0.0812919
0.001564	0.0812728
0.001565	0.0812442
0.001566	0.0812156
0.001567	0.0811965
0.001569	0.081187
0.00157	0.0811679
0.001571	0.0811489
0.001573	0.0811346
0.001574	0.0811155
0.001575	0.0810869
0.001577	0.081063
0.001578	0.0810487
0.00158	0.0810249
0.001581	0.0810058
0.001583	0.0809915
0.001584	0.0809772
0.001586	0.0809677
0.001587	0.0809534
0.001589	0.0809391
0.00159	0.0809152
0.001591	0.0808914
0.001592	0.0808771
0.001595	0.080858
0.001597	0.0808437
0.001598	0.0808294
0.001599	0.0808151
0.0016	0.080796
0.001601	0.0807722
0.001602	0.0807579
0.001603	0.0807484
0.001604	0.0807388
0.001605	0.080715
0.001608	0.0806864
0.00161	0.0806721
0.001611	0.0806625
0.001612	0.0806482
0.001613	0.0806244
0.001614	0.0806053
0.001615	0.080591
0.001617	0.0805767
0.001618	0.0805672
0.00162	0.0805529
0.001621	0.0805386
0.001624	0.080529
0.001625	0.0805195
0.001627	0.08051
0.001628	0.0805004
0.001629	0.0804861
0.00163	0.0804671
0.001631	0.0804528
0.001633	0.0804432
0.001634	0.0804241
0.001636	0.0804003
0.001637	0.080386
0.001638	0.0803765
0.00164	0.0803622
0.001641	0.0803479
0.001642	0.0803336
0.001643	0.0803145
0.001646	0.0803002
0.001647	0.0802906
0.001648	0.0802763
0.00165	0.080262
0.001652	0.0802477
0.001653	0.0802334
0.001654	0.0802191
0.001657	0.0802048
0.001658	0.0801953
0.001659	0.080181
0.001663	0.0801619
0.001664	0.0801476
0.001665	0.0801333
0.001666	0.0801142
0.001667	0.0800999
0.001668	0.0800856
0.00167	0.0800713
0.001672	0.0800618
0.001673	0.0800475
0.001674	0.0800332
0.001675	0.0800189
0.001676	0.0799998
0.001677	0.0799855
0.001678	0.0799712
0.001679	0.0799569
0.00168	0.0799426
0.001681	0.0799092
0.001683	0.0798806
0.001684	0.0798711
0.001685	0.0798568
0.001686	0.0798425
0.001687	0.0798329
0.00169	0.0798186
0.001692	0.0797996
0.001693	0.0797853
0.001695	0.0797614
0.001696	0.0797376
0.001697	0.0797185
0.001698	0.0796994
0.001701	0.0796899
0.001702	0.0796804
0.001703	0.0796661
0.001704	0.0796518
0.001707	0.0796422
0.001708	0.0796327
0.001709	0.0796184
0.00171	0.0796041
0.001711	0.0795802
0.001714	0.0795564
0.001715	0.0795469
0.001716	0.0795373
0.001717	0.0795278
0.00172	0.0795087
0.001721	0.0794849
0.001722	0.0794706
0.001723	0.0794563
0.001724	0.0794324
0.001726	0.0794086
0.001731	0.0793943
0.001732	0.07938
0.001734	0.0793657
0.001735	0.0793561
0.001736	0.0793466
0.001738	0.0793371
0.001739	0.0793132
0.00174	0.0792846
0.001741	0.0792703
0.001742	0.0792608
0.001749	0.0792465
0.001751	0.0792274
0.001756	0.0792131
0.001757	0.079194
0.001758	0.0791654
0.001759	0.0791464
0.00176	0.0791273
0.001761	0.0791082
0.001763	0.0790987
0.001764	0.0790844
0.001765	0.0790605
0.001767	0.0790415
0.001769	0.0790176
0.001772	0.078989
0.001773	0.07897
0.001775	0.0789509
0.001776	0.0789366
0.001778	0.078927
0.001779	0.0789175
0.001783	0.078908
0.001786	0.0788937
0.001789	0.0788746
0.00179	0.0788603
0.001792	0.0788508
0.001793	0.0788412
0.001794	0.0788269
0.001796	0.0787983
0.001797	0.0787697
0.001798	0.0787554
0.0018	0.0787459
0.001801	0.0787363
0.001803	0.0787268
0.001804	0.0787173
0.001808	0.0786934
0.001809	0.0786696
0.00181	0.07866
0.001811	0.0786505
0.001813	0.078641
0.001816	0.0786314
0.001817	0.0786124
0.001818	0.0785838
0.001819	0.0785599
0.00182	0.0785456
0.001821	0.0785218
0.001822	0.0784979
0.001823	0.0784884
0.001824	0.0784789
0.001827	0.0784693
0.001828	0.0784598
0.00183	0.078436
0.001831	0.0784073
0.001832	0.078393
0.001833	0.0783835
0.001836	0.078374
0.001838	0.0783597
0.001839	0.0783454
0.00184	0.0783358
0.001842	0.0783263
0.001843	0.0783168
0.001844	0.0782977
0.001848	0.0782786
0.001851	0.0782691
0.001853	0.0782595
0.001855	0.0782452
0.001856	0.0782309
0.001857	0.0782166
0.00186	0.0782023
0.001862	0.0781928
0.001864	0.0781785
0.001865	0.0781594
0.001866	0.0781403
0.001867	0.0781213
0.001869	0.078107
0.00187	0.0780927
0.001871	0.0780784
0.001873	0.0780688
0.001874	0.0780593
0.001876	0.0780498
0.001877	0.0780402
0.00188	0.0780307
0.001882	0.0780212
0.001883	0.0780116
0.001885	0.0779878
0.001886	0.0779639
0.001887	0.0779544
0.001888	0.0779449
0.001889	0.077921
0.00189	0.0778972
0.001892	0.0778877
0.001894	0.0778733
0.001895	0.0778543
0.001896	0.0778304
0.001897	0.0778066
0.0019	0.0777923
0.001901	0.0777828
0.001902	0.0777732
0.001904	0.0777589
0.001905	0.0777446
0.001906	0.0777351
0.001908	0.077716
0.001909	0.0776922
0.00191	0.0776731
0.001911	0.077654
0.001914	0.0776397
0.001916	0.0776302
0.001919	0.0776207
0.00192	0.0776016
0.001921	0.0775825
0.001922	0.077573
0.001924	0.0775634
0.001925	0.0775539
0.001928	0.0775348
0.001929	0.0775158
0.00193	0.0775062
0.001932	0.0774967
0.001933	0.0774824
0.001934	0.0774681
0.001935	0.0774585
0.001936	0.0774442
0.001937	0.0774299
0.001938	0.0774204
0.001939	0.0774109
0.001941	0.0773918
0.001942	0.0773727
0.001944	0.0773584
0.001945	0.0773441
0.001946	0.0773346
0.001947	0.0773203
0.001949	0.0772964
0.00195	0.0772726
0.001951	0.0772583
0.001952	0.0772488
0.001955	0.0772392
0.001956	0.0772249
0.001958	0.0772106
0.00196	0.0772011
0.001961	0.0771868
0.001962	0.0771582
0.001963	0.0771296
0.001964	0.0771153
0.001965	0.0771057
0.001966	0.0770962
0.001968	0.0770723
0.001969	0.077039
0.00197	0.0770199
0.001971	0.0770056
0.001972	0.0769818
0.001973	0.0769579
0.001976	0.0769388
0.001977	0.0769245
0.001978	0.076915
0.001981	0.0768912
0.001982	0.0768626
0.001983	0.0768483
0.001984	0.076834
0.001985	0.0768149
0.001986	0.0767958
0.001987	0.0767815
0.001989	0.076772
0.00199	0.0767577
0.001992	0.0767386
0.001993	0.0767243
0.001997	0.0767148
0.001998	0.0767005
0.002002	0.0766862
0.002003	0.0766671
0.002004	0.076648
0.002005	0.0766385
0.002007	0.0766242
0.002009	0.0766051
0.002012	0.076586
0.002013	0.0765717
0.002017	0.0765527
0.002019	0.0765288
0.002021	0.0765097
0.002022	0.0764859
0.002023	0.0764525
0.002028	0.0764192
0.002031	0.0764001
0.002035	0.0763858
0.002036	0.0763667
0.002038	0.0763524
0.002039	0.0763286
0.00204	0.0763047
0.002041	0.0762952
0.002042	0.0762809
0.002043	0.0762666
0.002044	0.076257
0.002046	0.076238
0.002047	0.0762141
0.002048	0.0761951
0.00205	0.0761808
0.002051	0.0761712
0.002057	0.0761617
0.002058	0.0761522
0.002059	0.0761426
0.00206	0.0761331
0.002063	0.0761045
0.002064	0.0760759
0.002065	0.0760616
0.002067	0.0760425
0.002068	0.0760187
0.00207	0.0759996
0.002071	0.07599
0.002072	0.0759805
0.002074	0.0759662
0.002075	0.0759519
0.002077	0.0759424
0.002078	0.0759233
0.002079	0.0758995
0.00208	0.0758804
0.002081	0.0758565
0.002082	0.0758232
0.002088	0.0757946
0.002089	0.0757755
0.00209	0.0757612
0.002093	0.0757517
0.002095	0.0757373
0.002096	0.0757183
0.002098	0.0756849
0.0021	0.0756563
0.002103	0.0756468
0.002104	0.0756372
0.002105	0.0756277
0.002108	0.0756182
0.002111	0.0756038
0.002114	0.0755895
0.002117	0.07558
0.002118	0.0755657
0.002119	0.0755466
0.00212	0.0755323
0.002122	0.0755228
0.002123	0.0755133
0.002124	0.0755037
0.002125	0.0754942
0.002126	0.0754847
0.00213	0.0754703
0.002131	0.0754465
0.002132	0.0754274
0.002133	0.0754131
0.002135	0.0753941
0.002137	0.0753798
0.00214	0.0753702
0.002142	0.0753559
0.002144	0.0753368
0.002145	0.0753225
0.002146	0.0753035
0.002147	0.0752796
0.002148	0.0752653
0.002149	0.0752558
0.002153	0.0752463
0.002154	0.0752367
0.002155	0.0752272
0.002157	0.0752177
0.00216	0.0752081
0.002161	0.0751938
0.002163	0.0751795
0.002165	0.07517
0.002166	0.0751604
0.002167	0.0751414
0.002168	0.0751223
0.002169	0.075108
0.00217	0.0750937
0.002171	0.0750842
0.002174	0.0750746
0.002176	0.0750651
0.002178	0.0750508
0.002179	0.0750317
0.002181	0.0750126
0.002182	0.0749983
0.002183	0.074984
0.002184	0.0749697
0.002189	0.0749507
0.002193	0.0749268
0.002195	0.0749125
0.002196	0.074903
0.002198	0.0748934
0.002199	0.0748839
0.0022	0.0748744
0.002202	0.0748648
0.002203	0.0748553
0.002206	0.074841
0.002209	0.0748267
0.00221	0.0748172
0.002211	0.0748076
0.002213	0.0747981
0.002214	0.0747885
0.002215	0.0747742
0.002216	0.0747599
0.002217	0.0747456
0.002219	0.0747313
0.00222	0.074717
0.002223	0.0746884
0.002225	0.0746598
0.002227	0.0746455
0.002228	0.0746312
0.002229	0.0746121
0.00223	0.0745978
0.002231	0.0745883
0.002232	0.074574
0.002233	0.0745549
0.002235	0.0745358
0.002236	0.0745215
0.002237	0.074512
0.002239	0.0745025
0.00224	0.0744929
0.002241	0.0744834
0.002242	0.0744739
0.002243	0.0744596
0.002244	0.0744453
0.002245	0.0744357
0.002246	0.0744214
0.002249	0.0744023
0.002252	0.074388
0.002254	0.0743737
0.002255	0.0743594
0.002256	0.0743499
0.002258	0.0743308
0.00226	0.0743118
0.002262	0.0743022
0.002264	0.0742784
0.002265	0.0742498
0.002266	0.0742355
0.00227	0.0742259
0.002272	0.0742164
0.002275	0.0742021
0.002276	0.074183
0.002277	0.074164
0.002279	0.0741497
0.00228	0.0741306
0.002281	0.0741115
0.002282	0.0740972
0.002283	0.0740829
0.002287	0.0740734
0.002288	0.0740638
0.002289	0.0740543
0.002291	0.0740448
0.002292	0.0740352
0.002293	0.0740162
0.002294	0.0739923
0.002295	0.073978
0.002299	0.0739685
0.0023	0.0739542
0.002302	0.0739399
0.002303	0.0739303
0.002306	0.0739208
0.002307	0.0739113
0.002308	0.0739017
0.002309	0.0738922
0.00231	0.0738827
0.002312	0.0738731
0.002313	0.0738588
0.002314	0.0738397
0.002315	0.0738207
0.002319	0.0738064
0.002322	0.0737873
0.002326	0.0737635
0.002327	0.0737492
0.00233	0.0737396
0.002332	0.0737301
0.002336	0.0737205
0.002338	0.073711
0.002341	0.0737015
0.002342	0.0736919
0.002344	0.0736824
0.002345	0.0736681
0.002346	0.073649
0.002347	0.0736347
0.002348	0.0736204
0.00235	0.0736061
0.002352	0.0735918
0.002353	0.0735775
0.002356	0.0735537
0.002362	0.0735298
0.002363	0.0735203
0.002369	0.073506
0.00237	0.0734869
0.002372	0.0734726
0.002373	0.0734583
0.002374	0.073444
0.002375	0.0734345
0.002376	0.0734249
0.002377	0.0734154
0.002378	0.0733916
0.002381	0.0733677
0.002382	0.0733582
0.002383	0.0733487
0.002386	0.0733344
0.002388	0.0733105
0.002389	0.0732914
0.00239	0.0732771
0.002392	0.0732581
0.002395	0.073239
0.002396	0.0732199
0.002397	0.0732056
0.002398	0.0731961
0.0024	0.0731865
0.002401	0.073177
0.002403	0.0731675
0.002405	0.0731532
0.002406	0.0731389
0.002407	0.0731293
0.00241	0.0731198
0.002412	0.0731103
0.002413	0.0731007
0.002415	0.0730864
0.002416	0.0730721
0.002418	0.0730626
0.00242	0.073053
0.002421	0.073034
0.002423	0.0730149
0.002424	0.0730054
0.002425	0.0729863
0.002426	0.0729672
0.002428	0.0729529
0.002429	0.0729386
0.002431	0.0729291
0.002432	0.0729195
0.002435	0.07291
0.002436	0.0728957
0.002437	0.0728814
0.002438	0.0728671
0.002441	0.0728528
0.002443	0.0728385
0.002445	0.0728242
0.002447	0.0728099
0.002448	0.072786
0.002451	0.072767
0.002453	0.0727574
0.002455	0.0727479
0.002457	0.0727384
0.002461	0.0727098
0.002462	0.0726812
0.002463	0.0726669
0.002464	0.0726525
0.002465	0.0726335
0.002467	0.0726144
0.002472	0.0726049
0.002473	0.0725953
0.002475	0.0725858
0.002478	0.0725763
0.00248	0.0725667
0.002481	0.0725572
0.002482	0.0725477
0.002485	0.0725381
0.002486	0.0725286
0.002487	0.072519
0.00249	0.0725047
0.002491	0.0724904
0.002492	0.0724809
0.002493	0.0724666
0.002494	0.0724523
0.002495	0.072438
[truncated: 6,803 more rows]

## Sheet: s=0.1
0	0.992287
9.99999e-07	0.859887
2e-06	0.672972
3e-06	0.577019
4e-06	0.519232
5e-06	0.479071
5.99999e-06	0.449436
6.99999e-06	0.42595
7.99999e-06	0.407137
8.99999e-06	0.391667
9.99999e-06	0.37861
1.1e-05	0.366794
1.2e-05	0.356742
1.3e-05	0.347714
1.4e-05	0.339782
1.5e-05	0.332735
1.6e-05	0.326131
1.7e-05	0.319969
1.8e-05	0.314225
1.9e-05	0.30925
2e-05	0.3047
2.1e-05	0.300452
2.2e-05	0.296429
2.3e-05	0.292539
2.4e-05	0.288994
2.5e-05	0.285365
2.6e-05	0.28165
2.7e-05	0.278287
2.8e-05	0.275131
2.9e-05	0.272192
3e-05	0.269435
3.1e-05	0.266896
3.2e-05	0.264715
3.3e-05	0.262612
3.4e-05	0.260673
3.5e-05	0.258825
3.6e-05	0.256801
3.7e-05	0.254947
3.8e-05	0.253311
3.9e-05	0.251597
4e-05	0.249906
4.1e-05	0.248216
4.2e-05	0.24661
4.3e-05	0.245125
4.4e-05	0.24358
4.5e-05	0.242078
4.6e-05	0.240678
4.7e-05	0.239266
4.8e-05	0.237933
4.9e-05	0.236739
5e-05	0.23554
5.09999e-05	0.234346
5.19999e-05	0.233213
5.29999e-05	0.232098
5.39999e-05	0.230989
5.49999e-05	0.229911
5.59999e-05	0.228881
5.69999e-05	0.227929
5.79999e-05	0.227087
5.89999e-05	0.226221
5.99999e-05	0.225324
6.09999e-05	0.224476
6.19999e-05	0.223712
6.29999e-05	0.22284
6.39999e-05	0.221822
6.49999e-05	0.220931
6.59999e-05	0.220077
6.69999e-05	0.219234
6.79999e-05	0.218495
6.89999e-05	0.217635
6.99999e-05	0.216792
7.09999e-05	0.216084
7.19999e-05	0.21535
7.29999e-05	0.214611
7.39999e-05	0.213914
7.49999e-05	0.213308
7.59999e-05	0.212715
7.69999e-05	0.212084
7.79999e-05	0.211448
7.89999e-05	0.210842
7.99999e-05	0.210333
8.09999e-05	0.2098
8.19999e-05	0.209212
8.29999e-05	0.208685
8.39999e-05	0.208158
8.49999e-05	0.207619
8.59999e-05	0.207128
8.69999e-05	0.206661
8.79999e-05	0.206165
8.89999e-05	0.205656
8.99999e-05	0.205195
9.09999e-05	0.204795
9.19999e-05	0.204353
9.29999e-05	0.20385
9.39999e-05	0.203353
9.49999e-05	0.202881
9.59999e-05	0.202438
9.69999e-05	0.201984
9.79999e-05	0.201487
9.89999e-05	0.201014
9.99999e-05	0.20062
0.000101	0.200227
0.000102	0.199833
0.000103	0.199439
0.000104	0.199033
0.000105	0.198627
0.000106	0.198209
0.000107	0.197761
0.000108	0.197282
0.000109	0.196846
0.00011	0.196458
0.000111	0.196094
0.000112	0.195773
0.000113	0.195452
0.000114	0.195119
0.000115	0.194749
0.000116	0.194367
0.000117	0.193998
0.000118	0.193634
0.000119	0.193295
0.00012	0.192974
0.000121	0.192701
0.000122	0.192428
0.000123	0.192095
0.000124	0.191695
0.000125	0.191344
0.000126	0.191077
0.000127	0.190805
0.000128	0.190496
0.000129	0.190156
0.00013	0.189841
0.000131	0.189568
0.000132	0.18932
0.000133	0.189053
0.000134	0.188763
0.000135	0.188411
0.000136	0.188042
0.000137	0.187702
0.000138	0.187387
0.000139	0.187127
0.00014	0.186908
0.000141	0.186696
0.000142	0.186448
0.000143	0.186163
0.000144	0.185891
0.000145	0.18566
0.000146	0.185412
0.000147	0.185157
0.000148	0.184885
0.000149	0.1846
0.00015	0.184333
0.000151	0.184067
0.000152	0.183879
0.000153	0.18374
0.000154	0.183594
0.000155	0.183424
0.000156	0.183182
0.000157	0.182946
0.000158	0.182734
0.000159	0.182528
0.00016	0.182297
0.000161	0.182061
0.000162	0.181855
0.000163	0.18157
0.000164	0.181316
0.000165	0.18114
0.000166	0.180946
0.000167	0.180704
0.000168	0.180474
0.000169	0.180304
0.00017	0.180092
0.000171	0.179849
0.000172	0.179619
0.000173	0.179389
0.000174	0.179159
0.000175	0.178959
0.000176	0.178789
0.000177	0.178632
0.000178	0.17848
0.000179	0.178298
0.00018	0.17811
0.000181	0.177941
0.000182	0.177795
0.000183	0.177662
0.000184	0.177492
0.000185	0.177311
0.000186	0.177147
0.000187	0.176996
0.000188	0.17685
0.000189	0.176705
0.00019	0.176547
0.000191	0.176335
0.000192	0.176129
0.000193	0.175996
0.000194	0.175838
0.000195	0.175644
0.000196	0.175487
0.000197	0.175341
0.000198	0.175172
0.000199	0.17499
0.0002	0.17482
0.000201	0.174663
0.000202	0.174481
0.000203	0.174293
0.000204	0.174117
0.000205	0.173954
0.000206	0.173808
0.000207	0.173651
0.000208	0.173512
0.000209	0.173402
0.00021	0.173275
0.000211	0.173136
0.000212	0.172984
0.000213	0.172821
0.000214	0.172688
0.000215	0.172591
0.000216	0.172488
0.000217	0.172336
0.000218	0.172197
0.000219	0.172082
0.00022	0.171954
0.000221	0.17176
0.000222	0.171548
0.000223	0.171403
0.000224	0.171276
0.000225	0.171148
0.000226	0.170991
0.000227	0.170839
0.000228	0.17073
0.000229	0.170627
0.00023	0.1705
0.000231	0.170361
0.000232	0.170227
0.000233	0.170106
0.000234	0.169997
0.000235	0.1699
0.000236	0.169797
0.000237	0.169682
0.000238	0.169561
0.000239	0.169458
0.00024	0.169373
0.000241	0.16927
0.000242	0.169161
0.000243	0.169052
0.000244	0.168973
0.000245	0.1689
0.000246	0.168816
0.000247	0.168725
0.000248	0.168598
0.000249	0.168482
0.00025	0.168379
0.000251	0.168301
0.000252	0.16824
0.000253	0.168131
0.000254	0.167986
0.000255	0.167852
0.000256	0.167767
0.000257	0.16767
0.000258	0.167549
0.000259	0.167458
0.00026	0.167349
0.000261	0.167234
0.000262	0.167149
0.000263	0.16704
0.000264	0.166925
0.000265	0.166822
0.000266	0.166725
0.000267	0.166634
0.000268	0.166519
0.000269	0.16638
0.00027	0.166271
0.000271	0.166162
0.000272	0.16601
0.000273	0.165883
0.000274	0.165768
0.000275	0.165653
0.000276	0.165526
0.000277	0.165386
0.000278	0.165313
0.000279	0.165223
0.00028	0.16512
0.000281	0.165053
0.000282	0.164998
0.000283	0.164956
0.000284	0.164883
0.000285	0.164798
0.000286	0.164732
0.000287	0.164629
0.000288	0.164508
0.000289	0.164429
0.00029	0.164332
0.000291	0.164253
0.000292	0.164199
0.000293	0.16412
0.000294	0.164011
0.000295	0.163908
0.000296	0.163829
0.000297	0.16375
0.000298	0.163659
0.000299	0.163587
0.0003	0.163508
0.000301	0.163387
0.000302	0.163265
0.000303	0.163144
0.000304	0.163053
0.000305	0.162987
0.000306	0.162902
0.000307	0.162781
0.000308	0.162684
0.000309	0.162599
0.00031	0.162502
0.000311	0.16246
0.000312	0.162417
0.000313	0.162302
0.000314	0.162181
0.000315	0.162096
0.000316	0.162017
0.000317	0.161926
0.000318	0.161823
0.000319	0.161745
0.00032	0.161678
0.000321	0.161599
0.000322	0.16152
0.000323	0.161466
0.000324	0.161417
0.000325	0.161363
0.000326	0.161296
0.000327	0.161175
0.000328	0.161066
0.000329	0.161024
0.00033	0.161005
0.000331	0.160939
0.000332	0.160836
0.000333	0.160745
0.000334	0.160654
0.000335	0.160575
0.000336	0.160502
0.000337	0.160412
0.000338	0.160327
0.000339	0.160266
0.00034	0.160181
0.000341	0.16009
0.000342	0.159987
0.000343	0.159848
0.000344	0.159733
0.000345	0.159648
0.000346	0.159575
0.000347	0.159484
0.000348	0.159375
0.000349	0.159272
0.00035	0.159194
0.000351	0.159151
0.000352	0.159085
0.000353	0.158982
0.000354	0.158891
0.000355	0.158812
0.000356	0.158745
0.000357	0.158666
0.000358	0.158582
0.000359	0.158533
0.00036	0.158467
0.000361	0.158382
0.000362	0.158327
0.000363	0.158285
0.000364	0.158212
0.000365	0.158139
0.000366	0.158067
0.000367	0.158006
0.000368	0.157982
0.000369	0.157939
0.00037	0.157867
0.000371	0.15777
0.000372	0.157673
0.000373	0.157618
0.000374	0.157594
0.000375	0.157533
0.000376	0.157449
0.000377	0.157382
0.000378	0.157315
0.000379	0.157249
0.00038	0.157188
0.000381	0.157127
0.000382	0.157067
0.000383	0.156994
0.000384	0.156934
0.000385	0.156891
0.000386	0.156837
0.000387	0.156776
0.000388	0.156709
0.000389	0.156637
0.00039	0.156558
0.000391	0.156479
0.000392	0.156431
0.000393	0.156382
0.000394	0.156309
0.000395	0.156255
0.000396	0.1562
0.000397	0.156146
0.000398	0.156073
0.000399	0.155994
0.0004	0.15594
0.000401	0.155891
0.000402	0.155849
0.000403	0.155788
0.000404	0.155722
0.000405	0.155667
0.000406	0.155613
0.000407	0.155546
0.000408	0.155467
0.000409	0.155382
0.00041	0.155322
0.000411	0.155279
0.000412	0.155219
0.000413	0.15514
0.000414	0.155073
0.000415	0.155019
0.000416	0.154952
0.000417	0.154879
0.000418	0.154837
0.000419	0.154795
0.00042	0.154734
0.000421	0.154686
0.000422	0.154649
0.000423	0.154589
0.000424	0.154522
0.000425	0.154486
0.000426	0.154437
0.000427	0.154389
0.000429	0.154334
0.00043	0.15428
0.000431	0.154225
0.000432	0.154171
0.000433	0.154122
0.000434	0.154068
0.000435	0.154025
0.000436	0.153983
0.000437	0.15391
0.000438	0.153813
0.000439	0.153746
0.00044	0.153704
0.000441	0.153643
0.000442	0.153571
0.000443	0.153486
0.000444	0.153401
0.000445	0.153353
0.000446	0.153316
0.000447	0.153268
0.000448	0.153183
0.000449	0.153104
0.00045	0.153062
0.000451	0.153007
0.000452	0.152953
0.000453	0.152904
0.000454	0.152862
0.000455	0.152813
0.000456	0.152771
0.000457	0.152728
0.000458	0.152662
0.000459	0.152607
0.00046	0.152571
0.000461	0.152529
0.000462	0.152492
0.000463	0.152456
0.000464	0.152413
0.000465	0.152371
0.000466	0.152316
0.000467	0.152268
0.000468	0.152232
0.000469	0.152183
0.000471	0.152129
0.000472	0.15208
0.000474	0.152038
0.000475	0.152013
0.000476	0.151971
0.000477	0.151917
0.000478	0.151874
0.000479	0.151844
0.00048	0.151814
0.000481	0.151753
0.000482	0.151692
0.000483	0.151644
0.000484	0.151614
0.000485	0.151589
0.000486	0.151559
0.000487	0.151541
0.000488	0.151505
0.000489	0.151468
0.00049	0.15145
0.000491	0.151426
0.000492	0.151383
0.000493	0.151329
0.000494	0.151292
0.000495	0.151268
0.000496	0.151244
0.000497	0.15122
0.000498	0.151189
0.000499	0.151165
0.0005	0.151147
0.000500999	0.151117
0.000502999	0.151092
0.000503999	0.151062
0.000504999	0.150989
0.000505999	0.150911
0.000506999	0.150844
0.000507999	0.15079
0.000508999	0.150741
0.000509999	0.150693
0.000510999	0.150644
0.000511999	0.15059
0.000512999	0.150535
0.000514999	0.150499
0.000515999	0.150456
0.000516999	0.150402
0.000517999	0.150353
0.000518999	0.150293
0.000519999	0.15025
0.000520999	0.150202
0.000521999	0.150147
0.000522999	0.150099
0.000523999	0.150038
0.000524999	0.14999
0.000525999	0.149947
0.000526999	0.149899
0.000527999	0.14985
0.000528999	0.14982
0.000529999	0.149784
0.000530999	0.149735
0.000531999	0.149687
0.000532999	0.149614
0.000533999	0.149547
0.000535999	0.149505
0.000536999	0.149469
0.000537999	0.14942
0.000539999	0.149353
0.000540999	0.149287
0.000541999	0.149244
0.000542999	0.149214
0.000543999	0.149184
0.000544999	0.14916
0.000545999	0.149117
0.000546999	0.149081
0.000547999	0.149069
0.000548999	0.149057
0.000549999	0.149032
0.000551999	0.149008
0.000553999	0.148996
0.000554999	0.148978
0.000556999	0.148948
0.000557999	0.148905
0.000558999	0.148857
0.000560999	0.148796
0.000561999	0.148748
0.000562999	0.148711
0.000563999	0.148651
0.000564999	0.148572
0.000565999	0.148523
0.000567999	0.148499
0.000568999	0.148475
0.000569999	0.148457
0.000570999	0.148402
0.000571999	0.148342
0.000572999	0.148311
0.000573999	0.148281
0.000575999	0.148245
0.000576999	0.148202
0.000578999	0.148172
0.000579999	0.148148
0.000580999	0.148105
0.000581999	0.148057
0.000582999	0.14802
0.000583999	0.147996
0.000584999	0.147978
0.000585999	0.147936
0.000586999	0.147875
0.000587999	0.147833
0.000588999	0.147802
0.000589999	0.147766
0.000590999	0.147724
0.000591999	0.147693
0.000592999	0.147675
0.000593999	0.147645
0.000594999	0.147602
0.000595999	0.14756
0.000596999	0.147524
0.000597999	0.147487
0.000598999	0.147451
0.000599999	0.147408
0.000600999	0.147372
0.000601999	0.147348
0.000602999	0.147324
0.000603999	0.147299
0.000604999	0.147269
0.000605999	0.147233
0.000606999	0.147196
0.000607999	0.147178
0.000608999	0.14713
0.000609999	0.147075
0.000611999	0.147039
0.000612999	0.14699
0.000613999	0.14696
0.000614999	0.146948
0.000615999	0.146936
0.000616999	0.146918
0.000617999	0.146887
0.000618999	0.146851
0.000620999	0.146815
0.000621999	0.146772
0.000622999	0.146736
0.000623999	0.146712
0.000624999	0.146681
0.000625999	0.146645
0.000626999	0.146609
0.000627999	0.146584
0.000628999	0.146542
0.000629999	0.146494
0.000630999	0.146475
0.000631999	0.146463
0.000632999	0.146451
0.000633999	0.146439
0.000634999	0.146421
0.000635999	0.146384
0.000636999	0.146348
0.000637999	0.146312
0.000638999	0.146263
0.000639999	0.146227
0.000640999	0.146185
0.000641999	0.146142
0.000642999	0.146106
0.000643999	0.146051
0.000644999	0.146009
0.000645999	0.145979
0.000646999	0.145942
0.000647999	0.145918
0.000648999	0.145906
0.000649999	0.145894
0.000651999	0.145869
0.000652999	0.145827
0.000653999	0.145791
0.000654999	0.145766
0.000655999	0.145748
0.000656999	0.145724
0.000658999	0.1457
0.000659999	0.145676
0.000660999	0.145633
0.000661999	0.145603
0.000662999	0.145591
0.000663999	0.145579
0.000664999	0.14556
0.000665999	0.145542
0.000666999	0.145518
0.000667999	0.145457
0.000668999	0.145403
0.000669999	0.145379
0.000670999	0.145354
0.000671999	0.145312
0.000672999	0.145257
0.000674999	0.145215
0.000675999	0.145191
0.000676999	0.145173
0.000677999	0.145142
0.000679999	0.145106
0.000680999	0.145076
0.000681999	0.145045
0.000682999	0.145003
0.000683999	0.144961
0.000684999	0.144912
0.000685999	0.144864
0.000686999	0.144833
0.000687999	0.144797
0.000689999	0.144755
0.000690999	0.144724
0.000691999	0.144682
0.000692999	0.144627
0.000693999	0.144591
0.000695999	0.144573
0.000696999	0.144549
0.000698999	0.144518
0.000699999	0.1445
0.000700999	0.144476
0.000701999	0.144439
0.000702999	0.144409
0.000703999	0.144385
0.000704999	0.144367
0.000705999	0.144343
0.000706999	0.144306
0.000707999	0.144276
0.000708999	0.144246
0.000709999	0.144209
0.000710999	0.144179
0.000711999	0.144155
0.000712999	0.144106
0.000713999	0.144064
0.000714999	0.144033
0.000715999	0.143991
0.000716999	0.143943
0.000717999	0.143882
0.000718999	0.143834
0.000719999	0.143803
0.000720999	0.143755
0.000721999	0.143706
0.000722999	0.143676
0.000723999	0.14364
0.000724999	0.143603
0.000725999	0.143579
0.000726999	0.143555
0.000727999	0.143531
0.000728999	0.143518
0.000729999	0.143488
0.000730999	0.143428
0.000731999	0.143385
0.000732999	0.143373
0.000733999	0.143361
0.000734999	0.143349
0.000735999	0.143331
0.000736999	0.143312
0.000737999	0.143288
0.000738999	0.143264
0.000739999	0.143252
0.000740999	0.143228
0.000741999	0.143203
0.000742999	0.143191
0.000745999	0.143155
0.000746999	0.1431
0.000747999	0.143052
0.000748999	0.143009
0.000749999	0.142973
0.000750999	0.142943
0.000751999	0.142925
0.000752999	0.142888
0.000753999	0.14284
0.000754999	0.142816
0.000755999	0.142803
0.000756999	0.142779
0.000758999	0.142749
0.000759999	0.142725
0.000760999	0.142688
0.000761999	0.142646
0.000764999	0.142622
0.000765999	0.14261
0.000766999	0.142591
0.000767999	0.142567
0.000768999	0.142537
0.000769999	0.142513
0.000770999	0.142494
0.000771999	0.14247
0.000772999	0.142446
0.000773999	0.14241
0.000774999	0.142379
0.000775999	0.142367
0.000777999	0.142349
0.000778999	0.142331
0.000779999	0.142313
0.000780999	0.142295
0.000782999	0.142276
0.000783999	0.142246
0.000784999	0.14221
0.000785999	0.142185
0.000786999	0.142137
0.000787999	0.14207
0.000789999	0.14204
0.000790999	0.142028
0.000791999	0.14201
0.000792999	0.141992
0.000793999	0.141979
0.000795999	0.141967
0.000796999	0.141943
0.000797999	0.141919
0.000798999	0.141901
0.000799999	0.141882
0.000801999	0.141864
0.000802999	0.14184
0.000803999	0.141816
0.000804999	0.141792
0.000806999	0.141767
0.000808999	0.141749
0.000809999	0.141737
0.000811999	0.141725
0.000812999	0.141713
0.000813999	0.141701
0.000814999	0.141683
0.000815999	0.141646
0.000816999	0.141598
0.000817999	0.141561
0.000818999	0.141537
0.000819999	0.141519
0.000820999	0.141501
0.000821999	0.141477
0.000823999	0.141452
0.000824999	0.141428
0.000825999	0.14141
0.000827999	0.141392
0.000828999	0.141367
0.000829999	0.141337
0.000830999	0.141295
0.000831999	0.141264
0.000832999	0.141234
0.000833999	0.141204
0.000834999	0.141186
0.000835999	0.141155
0.000836999	0.141125
0.000837999	0.141095
0.000838999	0.141071
0.000840999	0.141058
0.000841999	0.141046
0.000843999	0.141022
0.000845999	0.140998
0.000846999	0.14098
0.000847999	0.140949
0.000849999	0.140925
0.000850999	0.140913
0.000853999	0.140889
0.000854999	0.140865
0.000855999	0.140852
0.000856999	0.140828
0.000857999	0.140804
0.000858999	0.140792
0.000859999	0.14078
0.000860999	0.140768
0.000861999	0.140719
0.000862999	0.140646
0.000863999	0.14061
0.000864999	0.140592
0.000865999	0.140568
0.000866999	0.140549
0.000867999	0.140525
0.000868999	0.140495
0.000869999	0.140471
0.000870999	0.140446
0.000872999	0.140422
0.000873999	0.140386
0.000874999	0.140356
0.000875999	0.140343
0.000878999	0.140325
0.000879999	0.140307
0.000880999	0.140295
0.000881999	0.140283
0.000883999	0.140271
0.000885999	0.140259
0.000886999	0.140246
0.000887999	0.140228
0.000888999	0.140198
0.000889999	0.140168
0.000892999	0.140131
0.000893999	0.140101
0.000894999	0.140089
0.000895999	0.140077
0.000896999	0.140065
0.000898999	0.140047
0.000899999	0.140028
0.000900999	0.139998
0.000901999	0.13995
0.000902999	0.139919
0.000903999	0.139901
0.000904999	0.139877
0.000905999	0.139853
0.000906999	0.139828
0.000907999	0.13981
0.000909999	0.139792
0.000911999	0.139762
0.000912999	0.139719
0.000914999	0.139677
0.000915999	0.139647
0.000916999	0.139628
0.000918999	0.139598
0.000919999	0.139544
0.000920999	0.139507
0.000921999	0.139495
0.000922999	0.139483
0.000923999	0.139459
0.000925999	0.139435
0.000926999	0.139422
0.000927999	0.139392
0.000928999	0.139332
0.000930999	0.139289
0.000932999	0.139271
0.000933999	0.139235
0.000935999	0.139192
0.000936999	0.139168
0.000937999	0.13915
0.000938999	0.139132
0.000939999	0.139119
0.000940999	0.139101
0.000943999	0.139071
0.000944999	0.139041
0.000945999	0.139016
0.000946999	0.138998
0.000948999	0.13898
0.000949999	0.138956
0.000950999	0.138938
0.000951999	0.13892
0.000952999	0.138889
0.000953999	0.138865
0.000954999	0.138847
0.000956999	0.138823
0.000958999	0.138804
0.000961999	0.13878
0.000962999	0.138744
0.000963999	0.13872
0.000964999	0.138707
0.000965999	0.138677
0.000966999	0.138647
0.000967999	0.138635
0.000968999	0.138623
0.000969999	0.138611
0.000970999	0.138592
0.000972999	0.138574
0.000973999	0.138562
0.000974999	0.13855
0.000975999	0.138538
0.000976999	0.138526
0.000977999	0.138507
0.000978999	0.138483
0.000979999	0.138459
0.000980999	0.138435
0.000981999	0.138398
0.000982999	0.138368
0.000983999	0.138356
0.000984999	0.138338
0.000986999	0.138314
0.000987999	0.138283
0.000988999	0.138241
0.000992999	0.138211
0.000993999	0.138198
0.000994999	0.138174
0.000995999	0.13815
0.000997999	0.138138
0.000998999	0.138126
0.000999999	0.138102
0.001002	0.138065
0.001003	0.138023
0.001004	0.137986
0.001005	0.137968
0.001006	0.137944
0.001007	0.137914
0.001008	0.137896
0.001009	0.137883
0.00101	0.137871
0.001011	0.137853
0.001013	0.137835
0.001014	0.137823
0.001015	0.137799
0.001016	0.137762
0.001017	0.137738
0.001018	0.13772
0.00102	0.137702
0.001021	0.137683
0.001022	0.137665
0.001023	0.137653
0.001024	0.137629
0.001025	0.137599
0.001026	0.137568
0.001027	0.137544
0.001028	0.137526
0.001029	0.137496
0.00103	0.137471
0.001032	0.137453
0.001033	0.137435
0.001034	0.137423
0.001036	0.137411
0.001037	0.137387
0.001038	0.137338
0.00104	0.137296
0.001042	0.137271
0.001044	0.137241
0.001045	0.137217
0.001046	0.137205
0.001047	0.137181
0.001048	0.137138
0.001049	0.137108
0.00105	0.137096
0.001051	0.137084
0.001052	0.137071
0.001053	0.137047
0.001054	0.137017
0.001056	0.136993
0.001057	0.136968
0.00106	0.136944
0.001062	0.13692
0.001063	0.136896
0.001065	0.136878
0.001067	0.136859
0.001072	0.136841
0.001073	0.136829
0.001074	0.136805
0.001075	0.136775
0.001076	0.13675
0.001077	0.136732
0.00108	0.13672
0.001081	0.136702
0.001082	0.136684
0.001083	0.136659
0.001085	0.136617
0.001086	0.136587
0.001087	0.136562
0.001088	0.136538
0.00109	0.136526
0.001091	0.136514
0.001093	0.136502
0.001094	0.136478
0.001098	0.136441
0.001099	0.136411
0.0011	0.136375
0.001104	0.136332
0.001105	0.136296
0.00111	0.136272
0.001112	0.136247
0.001114	0.136223
0.001115	0.136199
0.001118	0.136169
0.00112	0.13615
0.001121	0.136132
0.001122	0.136114
0.001124	0.136102
0.001125	0.13609
0.001126	0.136078
0.001127	0.136066
0.001128	0.136041
0.001131	0.136017
0.001132	0.136005
0.001133	0.135987
0.001135	0.135963
0.001137	0.135938
0.001138	0.135914
0.001139	0.135884
0.001141	0.135854
0.001142	0.135829
0.001144	0.135799
0.001145	0.135763
0.001146	0.135738
0.001147	0.135726
0.001148	0.135708
0.001149	0.135678
0.00115	0.135654
0.001152	0.135629
0.001153	0.135605
0.001155	0.135587
0.001156	0.135569
0.001159	0.135557
0.00116	0.135532
0.001161	0.135496
0.001162	0.135472
0.001163	0.135454
0.001165	0.135423
0.001166	0.135369
0.001167	0.135326
0.001168	0.135302
0.001169	0.13526
0.001171	0.135223
0.001172	0.135205
0.001173	0.135193
0.001174	0.135181
0.001175	0.135169
0.001177	0.135145
0.001178	0.135114
0.001179	0.135096
0.00118	0.135084
0.001183	0.135066
0.001185	0.135048
0.001187	0.13503
0.001188	0.134999
0.001189	0.134963
0.00119	0.134939
0.001191	0.134927
0.001192	0.134908
0.001193	0.13489
0.001194	0.134878
0.001197	0.134866
0.001198	0.134842
0.001201	0.134817
0.001202	0.134799
0.001203	0.134781
0.001206	0.134763
0.001208	0.134739
0.001209	0.134696
0.00121	0.13466
0.001211	0.134648
0.001213	0.134636
0.001214	0.134624
0.001215	0.134611
0.001216	0.134599
0.001217	0.134581
0.001218	0.134557
0.001219	0.134539
0.00122	0.134521
0.001221	0.134502
0.001223	0.13449
0.001224	0.134472
0.001225	0.134442
0.001226	0.134418
0.001227	0.134405
0.001228	0.134393
0.001232	0.134369
0.001233	0.134339
0.001239	0.134321
0.00124	0.134308
0.001241	0.13429
0.001243	0.134272
0.001247	0.13426
0.001249	0.134242
0.00125	0.134224
0.001251	0.134212
0.001252	0.134199
0.001254	0.134187
0.001255	0.134175
0.001256	0.134157
0.001257	0.134133
0.001258	0.134115
0.001259	0.134096
0.00126	0.134072
0.001261	0.134054
0.001262	0.134036
0.001263	0.133999
0.001266	0.133957
0.001269	0.133933
0.00127	0.133915
0.001271	0.133896
0.001272	0.133884
0.001274	0.13386
0.001275	0.133836
0.001276	0.133824
0.001278	0.133799
0.00128	0.133769
0.001281	0.133751
0.001282	0.133739
0.001283	0.133721
0.001284	0.133703
0.001285	0.133678
0.001286	0.133654
0.001287	0.133636
0.001288	0.133606
0.001289	0.133575
0.00129	0.133557
0.001292	0.133545
0.001294	0.133533
0.001295	0.133515
0.001296	0.13349
0.001297	0.133466
0.0013	0.133448
0.001302	0.13343
0.001303	0.133412
0.001305	0.1334
0.001306	0.133387
0.001308	0.133375
0.001309	0.133351
0.001311	0.133327
0.001313	0.133309
0.001316	0.133291
0.001317	0.133272
0.001318	0.133254
0.001319	0.133242
0.00132	0.133224
0.001321	0.1332
0.001322	0.133175
0.001323	0.133157
0.001324	0.133145
0.001326	0.133121
0.001327	0.133091
0.001328	0.133054
0.001329	0.133018
0.00133	0.132975
0.001333	0.132939
0.001334	0.132921
0.001335	0.132891
0.001336	0.13286
0.00134	0.132842
0.001341	0.132824
0.001343	0.1328
0.001344	0.132782
0.001345	0.132769
0.001346	0.132757
0.001347	0.132739
0.001348	0.132715
0.00135	0.132697
0.001351	0.132685
0.001352	0.132672
0.001353	0.13266
0.001354	0.132642
0.001355	0.132618
0.001356	0.1326
0.001357	0.132582
0.001359	0.132563
0.00136	0.132551
0.001361	0.132539
0.001362	0.132527
0.001364	0.132515
0.001365	0.132491
0.001366	0.13246
0.001367	0.132442
0.001369	0.13243
0.00137	0.132406
0.001372	0.132376
0.001374	0.132351
0.001376	0.132333
0.001378	0.132321
0.00138	0.132309
0.001381	0.132291
0.001382	0.132273
0.001383	0.132254
0.001384	0.132236
0.001385	0.132224
0.001386	0.132212
0.001387	0.132188
0.001388	0.132164
0.001389	0.132151
0.00139	0.132139
0.001393	0.132121
0.001394	0.132097
0.001396	0.132073
0.001398	0.132048
0.001399	0.132024
0.001401	0.131994
0.001404	0.131964
0.001406	0.131945
0.001407	0.131927
0.001408	0.131903
0.00141	0.131885
0.001411	0.131873
0.001414	0.131861
0.001415	0.131842
0.001416	0.131824
0.001417	0.131806
0.001421	0.131788
0.001422	0.131776
0.001425	0.131764
0.001427	0.131745
0.001428	0.131715
0.001432	0.131679
0.001435	0.131648
0.001437	0.13163
0.001438	0.131606
0.001439	0.131582
0.001441	0.13157
0.001442	0.131552
0.001446	0.131533
0.001449	0.131521
0.00145	0.131509
0.001451	0.131497
0.001454	0.131479
0.001455	0.131461
0.001456	0.131442
0.001457	0.131424
0.001458	0.1314
0.00146	0.131376
0.001461	0.131352
0.001462	0.131315
0.001463	0.131285
0.001464	0.131261
0.001465	0.13123
0.001466	0.1312
0.001467	0.131182
0.001469	0.13117
0.00147	0.131152
0.001471	0.131133
0.001473	0.131115
0.001474	0.131097
0.001475	0.131085
0.001478	0.131067
0.001479	0.131049
0.001483	0.131036
0.001486	0.131024
0.001487	0.131006
0.001489	0.130982
0.00149	0.130964
0.001491	0.130946
0.001492	0.130927
0.001493	0.130909
0.001495	0.130885
0.001498	0.130867
0.001501	0.130855
0.001502	0.130837
0.001503	0.130818
0.001504	0.130806
0.001505	0.130782
0.001509	0.130758
0.00151	0.130746
0.001512	0.130734
0.001513	0.130715
0.001515	0.130691
0.00152	0.130673
0.001521	0.130661
0.001522	0.130649
0.001523	0.130631
0.001524	0.130606
0.001525	0.130588
0.001528	0.130576
0.00153	0.130564
0.001531	0.130521
0.001532	0.130473
0.001534	0.130455
0.001535	0.130443
0.001536	0.130431
0.001537	0.130412
0.001539	0.130394
0.001542	0.130382
0.001543	0.130358
0.001546	0.130334
0.001547	0.130322
0.001549	0.130309
0.00155	0.130297
0.001551	0.130285
0.001552	0.130267
0.001553	0.130249
0.001554	0.130237
0.001556	0.130225
0.001561	0.130212
0.001562	0.130194
0.001564	0.130158
0.001566	0.130128
0.001567	0.130097
0.001568	0.130061
0.00157	0.130043
0.001571	0.130031
0.001572	0.130019
0.001573	0.130006
0.001574	0.129988
0.001578	0.129964
0.001579	0.129946
0.00158	0.129934
0.001581	0.129916
0.001582	0.129891
0.001585	0.129873
0.001586	0.129855
0.001587	0.129837
0.001591	0.129825
0.001593	0.129806
0.001594	0.129788
0.001596	0.12977
0.001598	0.129752
0.001599	0.12974
0.0016	0.129722
0.001602	0.129703
0.001603	0.129691
0.001604	0.129679
0.001605	0.129661
0.001607	0.129643
0.001608	0.129631
0.001611	0.129607
0.001612	0.129582
0.001614	0.129564
0.001615	0.12954
0.001617	0.129522
0.001618	0.129504
0.001621	0.129485
0.001622	0.129473
0.001623	0.129461
0.001624	0.129449
0.001625	0.129437
0.001626	0.129425
0.001627	0.129413
0.001628	0.129401
0.001629	0.129382
0.00163	0.129358
0.001631	0.129328
0.001632	0.129291
0.001633	0.129267
0.001634	0.129249
0.001635	0.129231
0.001637	0.129219
0.001638	0.129207
0.00164	0.129194
0.001642	0.129176
0.001645	0.129158
0.001647	0.129146
0.001648	0.129134
0.001649	0.129104
0.00165	0.129073
0.001652	0.129055
0.001656	0.129031
0.001657	0.129007
0.001659	0.128976
0.001661	0.128952
0.001662	0.12894
0.001664	0.128928
0.001667	0.128916
0.001668	0.128904
0.00167	0.128892
0.001672	0.128873
0.001673	0.128855
0.001674	0.128843
0.001675	0.128831
0.001676	0.128819
0.001678	0.128807
0.00168	0.128795
0.001681	0.128776
0.001682	0.128758
0.001683	0.128746
0.001687	0.128728
0.001688	0.12871
0.001689	0.128698
0.00169	0.128686
0.001691	0.128667
0.001693	0.128649
0.001695	0.128637
0.001696	0.128625
0.001699	0.128607
0.0017	0.128589
0.001701	0.128576
0.001702	0.128564
0.001703	0.128546
0.001705	0.128528
0.001706	0.12851
0.001708	0.128492
0.001709	0.12848
0.00171	0.128461
0.001711	0.128437
0.001712	0.128419
0.001714	0.128407
0.001715	0.128389
0.001716	0.12837
0.001717	0.128358
0.001719	0.128346
0.00172	0.128334
0.001721	0.128316
0.001722	0.128292
0.001723	0.128273
0.001724	0.128261
0.001726	0.128249
0.001727	0.128237
0.001728	0.128225
0.001729	0.128213
0.001733	0.128195
0.001734	0.12817
0.001735	0.128152
0.001736	0.12814
0.001737	0.128128
0.001742	0.128104
0.001745	0.12808
0.001747	0.128061
0.001749	0.128043
0.001751	0.128025
0.001753	0.128007
0.001754	0.127983
0.001755	0.127958
0.001756	0.127946
0.001758	0.127934
0.00176	0.127922
0.001761	0.127904
0.001764	0.127886
0.001766	0.127868
0.001767	0.127849
0.001768	0.127837
0.001769	0.127819
0.00177	0.127795
0.001774	0.127777
0.001775	0.127765
0.001776	0.127752
0.00178	0.127734
0.001782	0.12771
0.001785	0.127686
0.001786	0.127662
0.001787	0.127631
0.00179	0.127601
0.001792	0.127577
0.001793	0.127546
0.001798	0.127516
0.001799	0.127492
0.001801	0.127474
0.001803	0.127462
0.001804	0.127449
0.001806	0.127425
0.001807	0.127395
0.001809	0.127377
0.00181	0.127359
0.001812	0.12734
0.001814	0.127328
0.001815	0.127316
0.001816	0.127298
0.001819	0.12728
0.001822	0.127268
0.001827	0.127249
0.001829	0.127231
0.00183	0.127207
0.001833	0.127177
0.001834	0.12714
0.001835	0.12711
0.001837	0.127092
0.001842	0.127068
0.001843	0.127043
0.001845	0.127007
0.001847	0.126977
0.001851	0.126965
0.001853	0.126953
0.001854	0.12694
0.001856	0.126928
0.001857	0.126916
0.001858	0.126898
0.001859	0.12688
0.001861	0.126868
0.001862	0.12685
0.001864	0.126825
0.001866	0.126807
0.001867	0.126783
0.001869	0.126753
0.001871	0.126722
0.001872	0.126698
0.001873	0.126686
0.001874	0.126674
0.001875	0.126656
0.001876	0.126638
0.001879	0.126619
0.001881	0.126601
0.001887	0.126589
0.00189	0.126571
0.001891	0.126547
0.001892	0.126528
0.001896	0.126516
0.001898	0.126504
0.0019	0.126492
0.001902	0.12648
0.001906	0.126468
0.001907	0.126456
0.001909	0.126444
0.001911	0.126431
0.001913	0.126413
0.001916	0.126389
0.001919	0.126371
0.001921	0.126353
0.001922	0.126335
0.001924	0.12631
0.001927	0.126286
0.001928	0.126268
0.001931	0.12625
0.001933	0.126238
0.001935	0.126225
0.001936	0.126213
0.001938	0.126201
0.001939	0.126189
0.00194	0.126171
0.001941	0.126153
0.001942	0.126135
0.001944	0.126116
0.001945	0.126104
0.001946	0.12608
0.001947	0.126056
0.001948	0.126038
0.00195	0.126019
0.001951	0.126001
0.001953	0.125983
0.001954	0.125953
0.001955	0.125923
0.001958	0.125898
0.001959	0.125874
0.00196	0.125856
0.001961	0.125832
0.001964	0.125807
0.001965	0.125783
0.001968	0.125759
0.00197	0.125741
0.001975	0.125729
0.001976	0.12571
0.001982	0.125692
0.001983	0.125674
0.001985	0.12565
0.001986	0.125632
0.001988	0.12562
0.001989	0.125601
0.00199	0.125583
0.001992	0.125571
0.001993	0.125559
0.001996	0.125547
0.001998	0.125535
0.002001	0.125517
0.002002	0.125486
0.002004	0.125456
0.002006	0.125438
0.002007	0.125426
0.002008	0.125414
0.00201	0.125401
0.002012	0.125389
0.002013	0.125377
0.002015	0.125365
0.002018	0.125353
0.002019	0.125341
0.00202	0.125323
0.002021	0.125298
0.002022	0.12528
0.002024	0.125262
0.002025	0.125244
0.002026	0.125232
0.002031	0.12522
0.002032	0.125208
0.002034	0.125195
0.002035	0.125177
0.002037	0.125159
0.002039	0.125147
0.002041	0.125135
0.002043	0.125123
0.002046	0.125105
0.002047	0.125086
0.002049	0.125056
0.002051	0.125026
0.002052	0.125014
0.002053	0.125002
0.002054	0.124989
0.002055	0.124977
0.002058	0.124965
0.00206	0.124953
0.002061	0.124941
0.002062	0.124929
0.002066	0.124911
0.002068	0.124892
0.002069	0.12488
0.002072	0.124868
0.002076	0.124856
0.002078	0.124838
0.002079	0.12482
0.002082	0.124808
0.002084	0.124796
0.002086	0.124771
0.002087	0.124741
0.002089	0.124717
0.002091	0.124699
0.002092	0.124686
0.002093	0.124674
0.002094	0.124662
0.002095	0.12465
0.002096	0.124632
0.002097	0.124614
0.002098	0.124602
0.0021	0.124589
0.002104	0.124577
0.002108	0.124565
0.002109	0.124547
0.00211	0.124529
0.002111	0.124511
0.002112	0.124493
0.002114	0.12448
0.002118	0.124456
0.002119	0.12442
0.002121	0.124396
0.002122	0.124377
0.002132	0.124359
0.002133	0.124341
0.002134	0.124323
0.002135	0.124311
0.002136	0.124299
0.002142	0.124287
0.002147	0.124268
0.002149	0.12425
0.002151	0.124238
0.002152	0.12422
0.002153	0.124196
0.002156	0.124171
0.002157	0.124153
0.002161	0.124141
0.002163	0.124129
0.002165	0.124117
0.002167	0.124105
0.002169	0.124093
0.00217	0.124081
0.002172	0.124062
0.002173	0.124038
0.002174	0.124014
0.002175	0.123996
0.002176	0.123984
0.002178	0.123971
0.002184	0.123959
0.002185	0.123947
0.002186	0.123923
0.002188	0.123899
0.002189	0.123887
0.002191	0.123875
0.002193	0.123862
0.002194	0.123844
0.002195	0.12382
0.002199	0.123796
0.0022	0.123771
0.002201	0.123747
0.002202	0.123729
0.002203	0.123711
0.002208	0.123693
0.00221	0.123681
0.002214	0.123662
0.002216	0.123644
0.002217	0.123608
0.002218	0.123572
0.002219	0.123559
0.002222	0.123547
0.002224	0.123535
0.002227	0.123523
0.002231	0.123511
0.002232	0.123499
0.002234	0.123481
0.002235	0.123462
0.002238	0.12345
0.002239	0.123438
0.002241	0.123426
0.002243	0.123414
0.002245	0.123402
0.002247	0.123384
0.002249	0.123366
0.002251	0.123347
0.002252	0.123329
0.002253	0.123317
0.002254	0.123305
0.002257	0.123293
0.002259	0.123269
0.00226	0.123244
0.002261	0.123226
0.002263	0.123202
0.002264	0.123184
0.002265	0.123172
0.002266	0.12316
0.002268	0.123147
0.002271	0.123135
0.002272	0.123117
0.002275	0.123093
0.002276	0.123075
0.002277	0.12305
0.002278	0.123026
0.002282	0.123014
0.002284	0.123002
0.002285	0.12299
0.002289	0.12296
0.002291	0.122929
0.002293	0.122917
0.002294	0.122899
0.002297	0.122881
0.002304	0.122869
0.002306	0.12285
0.00231	0.122826
0.002315	0.122808
0.002316	0.122796
0.002317	0.122784
0.002318	0.122772
0.002319	0.12276
0.002321	0.122741
0.002323	0.122717
0.002324	0.122693
0.002325	0.122675
0.002326	0.122663
0.002327	0.122651
0.002332	0.122632
0.002336	0.122614
0.002338	0.122602
0.002341	0.12259
0.002343	0.122578
0.002346	0.12256
0.002348	0.122541
0.002349	0.122529
0.00235	0.122511
0.002351	0.122493
0.002354	0.122475
0.002357	0.122457
0.002359	0.122445
0.002361	0.122432
0.002362	0.122408
0.002364	0.122378
0.002365	0.12236
0.002371	0.122348
0.002373	0.122335
0.002379	0.122323
0.00238	0.122305
0.002381	0.122287
0.002383	0.122275
0.002384	0.122263
0.002385	0.122251
0.002386	0.122239
0.002388	0.122226
0.00239	0.122214
0.002392	0.122202
0.002393	0.12219
0.002394	0.122178
0.002395	0.122166
0.002396	0.122154
0.002402	0.122142
0.002403	0.122129
0.002409	0.122105
0.00241	0.122075
0.002411	0.122051
0.002412	0.122033
0.002413	0.12202
0.002415	0.122002
0.002416	0.121984
0.002417	0.121972
0.002418	0.12196
0.002419	0.121948
0.002423	0.121929
0.002424	0.121905
0.002425	0.121887
0.002431	0.121869
0.002436	0.121845
0.002439	0.121826
0.002445	0.121814
0.002449	0.121802
0.00245	0.12179
0.002455	0.121778
0.002456	0.12176
0.002457	0.121742
0.002462	0.12173
0.002465	0.121717
0.00247	0.121705
0.002472	0.121693
0.002473	0.121681
0.002474	0.121669
0.002475	0.121651
0.002477	0.121627
0.002478	0.121608
0.00248	0.121596
0.002481	0.121584
0.002482	0.121572
0.002483	0.121554
0.002487	0.121536
0.002493	0.121524
0.002494	0.121499
0.002496	0.121469
0.002497	0.121451
0.002498	0.121439
0.002499	0.121427
0.002502	0.121414
0.002505	0.121402
0.002507	0.121384
0.00251	0.121366
0.002511	0.121354
0.002512	0.121336
0.002517	0.121318
0.002519	0.121305
0.00252	0.121287
0.002521	0.121269
0.002522	0.121257
0.002524	0.121245
0.002525	0.121233
0.00253	0.121221
0.002537	0.121208
0.002538	0.121196
0.002539	0.121184
0.002542	0.121172
0.002546	0.121148
0.002548	0.121112
0.00255	0.121087
0.002551	0.121075
0.002552	0.121063
0.002557	0.121051
0.002559	0.121039
0.002564	0.121021
0.002567	0.120996
0.002569	0.120978
0.002574	0.12096
0.002575	0.120936
0.002576	0.120918
0.002578	0.120899
0.002579	0.120881
0.002583	0.120869
0.002585	0.120857
0.002588	0.120833
0.002591	0.120802
0.002592	0.120784
0.002593	0.120766
0.002596	0.120748
0.002597	0.120724
0.002602	0.120693
0.002604	0.120675
0.002605	0.120663
0.002606	0.120651
0.00261	0.120639
0.002612	0.120627
0.002613	0.120615
0.002615	0.120603
0.002621	0.12059
0.002622	0.120578
0.002623	0.120566
0.002625	0.120554
0.002627	0.120536
0.002629	0.120512
0.00263	0.120493
0.002634	0.120481
0.002635	0.120469
0.002636	0.120457
0.002639	0.120439
0.00264	0.120421
0.002641	0.120409
0.002642	0.12039
0.002643	0.120372
0.002645	0.12036
0.002646	0.120348
0.002648	0.120336
0.002649	0.120324
0.00265	0.120312
0.002651	0.1203
0.002653	0.120287
0.002654	0.120275
0.002656	0.120263
0.002657	0.120251
0.002659	0.120239
0.002663	0.120227
0.002664	0.120209
0.002666	0.120184
0.002668	0.12016
0.002669	0.120142
0.002671	0.12013
0.002672	0.120118
0.002674	0.1201
0.002677	0.120081
0.00268	0.120063
0.002682	0.120045
0.002683	0.120033
0.002684	0.120021
0.002685	0.120009
0.002686	0.119997
0.002691	0.119984
0.002692	0.119972
0.002693	0.11996
0.002694	0.119942
0.002695	0.119924
0.002696	0.119912
0.002697	0.1199
0.0027	0.119888
0.002704	0.119869
0.002707	0.119851
0.002709	0.119839
0.002711	0.119827
0.002714	0.119815
0.002716	0.119797
0.002721	0.119778
0.002723	0.119766
0.002724	0.119754
0.002727	0.119742
0.002734	0.119724
0.002736	0.119688
0.002738	0.119657
0.002744	0.119645
0.002747	0.119621
0.002748	0.119597
0.002751	0.119579
0.002752	0.11956
0.002754	0.119548
0.002755	0.119536
0.002758	0.119524
0.002759	0.119506
0.00276	0.119488
0.002761	0.119476
0.002763	0.119463
0.002764	0.119451
0.002766	0.119433
0.002767	0.119415
0.002772	0.119403
0.002774	0.119391
0.002781	0.119379
0.002782	0.119354
0.002783	0.11933
0.002784	0.119318
0.002786	0.119306
0.002787	0.119288
0.002788	0.11927
0.00279	0.119257
0.002792	0.119227
0.002793	0.119197
0.002794	0.119185
0.002795	0.119166
0.002796	0.119148
0.002798	0.119136
0.002799	0.119124
0.0028	0.1191
0.002801	0.119076
0.002802	0.119063
0.002803	0.119051
0.002806	0.119033
0.002807	0.119015
0.002811	0.119003
0.002812	0.118991
0.002815	0.118973
0.002818	0.118954
0.002819	0.118942
0.00282	0.11893
0.002821	0.118912
0.002822	0.118894
0.002824	0.118882
0.002825	0.118864
0.002827	0.118845
0.002829	0.118833
0.002831	0.118821
0.002833	0.118809
0.002834	0.118785
0.002835	0.118761
0.002839	0.118748
0.002842	0.118736
0.002846	0.118724
0.002849	0.118712
0.00285	0.118694
0.002852	0.118676
0.002853	0.118664
0.002854	0.118651
0.002855	0.118639
0.002856	0.118627
0.002859	0.118615
0.002862	0.118603
0.002864	0.118591
0.002867	0.118573
0.002872	0.118555
0.002873	0.118536
0.002874	0.118518
0.002875	0.118506
0.002876	0.118494
0.002879	0.118482
0.00288	0.11847
0.002881	0.118458
0.002882	0.118445
0.002886	0.118433
0.002887	0.118421
0.002889	0.118409
[truncated: 9,022 more rows]

## Sheet: s=0.15
0	0.989997
9.99999e-07	0.861469
2e-06	0.684302
3e-06	0.593829
4e-06	0.539886
5e-06	0.502326
5.99999e-06	0.474612
6.99999e-06	0.45276
7.99999e-06	0.434876
8.99999e-06	0.419781
9.99999e-06	0.407083
1.1e-05	0.39598
1.2e-05	0.386661
1.3e-05	0.378245
1.4e-05	0.370309
1.5e-05	0.363339
1.6e-05	0.357305
1.7e-05	0.351702
1.8e-05	0.346272
1.9e-05	0.341511
2e-05	0.336969
2.1e-05	0.332537
2.2e-05	0.328545
2.3e-05	0.324852
2.4e-05	0.321285
2.5e-05	0.318095
2.6e-05	0.315329
2.7e-05	0.312681
2.8e-05	0.310041
2.9e-05	0.307573
3e-05	0.305224
3.1e-05	0.302961
3.2e-05	0.300941
3.3e-05	0.29893
3.4e-05	0.296879
3.5e-05	0.294993
3.6e-05	0.29317
3.7e-05	0.291496
3.8e-05	0.289768
3.9e-05	0.287937
4e-05	0.286373
4.1e-05	0.284817
4.2e-05	0.283262
4.3e-05	0.281769
4.4e-05	0.280346
4.5e-05	0.27916
4.6e-05	0.27795
4.7e-05	0.276748
4.8e-05	0.275702
4.9e-05	0.27465
5e-05	0.273659
5.09999e-05	0.272732
5.19999e-05	0.271679
5.29999e-05	0.270548
5.39999e-05	0.269448
5.49999e-05	0.268387
5.59999e-05	0.26746
5.69999e-05	0.266588
5.79999e-05	0.265731
5.89999e-05	0.264859
5.99999e-05	0.264057
6.09999e-05	0.263319
6.19999e-05	0.262447
6.29999e-05	0.261519
6.39999e-05	0.26071
6.49999e-05	0.259964
6.59999e-05	0.259154
6.69999e-05	0.258431
6.79999e-05	0.257818
6.89999e-05	0.257198
6.99999e-05	0.256475
7.09999e-05	0.255815
7.19999e-05	0.255249
7.29999e-05	0.254675
7.39999e-05	0.254149
7.49999e-05	0.25363
7.59999e-05	0.253064
7.69999e-05	0.252475
7.79999e-05	0.251925
7.89999e-05	0.251391
7.99999e-05	0.25088
8.09999e-05	0.250369
8.19999e-05	0.249898
8.29999e-05	0.249466
8.39999e-05	0.248979
8.49999e-05	0.248483
8.59999e-05	0.247973
8.69999e-05	0.247478
8.79999e-05	0.24703
8.89999e-05	0.246645
8.99999e-05	0.246189
9.09999e-05	0.24571
9.19999e-05	0.245262
9.29999e-05	0.244798
9.39999e-05	0.244445
9.49999e-05	0.244138
9.59999e-05	0.243832
9.69999e-05	0.243486
9.79999e-05	0.24303
9.89999e-05	0.242574
9.99999e-05	0.242127
0.000101	0.241734
0.000102	0.241435
0.000103	0.241168
0.000104	0.240791
0.000105	0.240351
0.000106	0.239981
0.000107	0.239612
0.000108	0.23929
0.000109	0.239007
0.00011	0.238693
0.000111	0.238339
0.000112	0.237931
0.000113	0.237561
0.000114	0.237168
0.000115	0.236815
0.000116	0.236571
0.000117	0.23632
0.000118	0.23606
0.000119	0.235778
0.00012	0.235526
0.000121	0.235314
0.000122	0.235055
0.000123	0.234717
0.000124	0.234418
0.000125	0.234151
0.000126	0.233923
0.000127	0.233609
0.000128	0.233224
0.000129	0.232933
0.00013	0.232682
0.000131	0.23247
0.000132	0.232242
0.000133	0.23199
0.000134	0.231739
0.000135	0.231519
0.000136	0.231338
0.000137	0.231079
0.000138	0.230796
0.000139	0.230568
0.00014	0.230324
0.000141	0.230057
0.000142	0.229806
0.000143	0.22957
0.000144	0.229311
0.000145	0.229051
0.000146	0.228855
0.000147	0.228674
0.000148	0.228368
0.000149	0.228061
0.00015	0.227873
0.000151	0.227723
0.000152	0.227551
0.000153	0.227338
0.000154	0.227118
0.000155	0.22693
0.000156	0.226726
0.000157	0.226568
0.000158	0.226451
0.000159	0.22627
0.00016	0.226073
0.000161	0.2259
0.000162	0.225751
0.000163	0.225586
0.000164	0.225374
0.000165	0.225209
0.000166	0.225091
0.000167	0.224934
0.000168	0.224761
0.000169	0.224502
0.00017	0.224243
0.000171	0.22403
0.000172	0.223842
0.000173	0.223653
0.000174	0.223472
0.000175	0.223307
0.000176	0.223095
0.000177	0.222899
0.000178	0.222742
0.000179	0.222616
0.00018	0.222467
0.000181	0.222317
0.000182	0.222184
0.000183	0.222042
0.000184	0.221925
0.000185	0.221752
0.000186	0.221594
0.000187	0.221445
0.000188	0.221304
0.000189	0.221194
0.00019	0.221037
0.000191	0.220895
0.000192	0.220777
0.000193	0.220628
0.000194	0.220463
0.000195	0.220314
0.000196	0.220164
0.000197	0.220007
0.000198	0.219827
0.000199	0.219677
0.0002	0.219559
0.000201	0.219434
0.000202	0.219308
0.000203	0.219198
0.000204	0.219088
0.000205	0.218931
0.000206	0.218813
0.000207	0.218703
0.000208	0.218577
0.000209	0.218467
0.00021	0.218326
0.000211	0.218224
0.000212	0.218121
0.000213	0.21798
0.000214	0.217846
0.000215	0.217729
0.000216	0.217634
0.000217	0.217563
0.000218	0.217485
0.000219	0.217383
0.00022	0.217257
0.000221	0.217163
0.000222	0.217108
0.000223	0.217006
0.000224	0.216911
0.000225	0.216841
0.000226	0.216754
0.000227	0.216628
0.000228	0.216487
0.000229	0.216408
0.00023	0.21633
0.000231	0.216212
0.000232	0.216094
0.000233	0.215992
0.000234	0.215913
0.000235	0.215819
0.000236	0.215733
0.000237	0.215646
0.000238	0.215552
0.000239	0.215465
0.00024	0.215371
0.000241	0.215293
0.000242	0.215198
0.000243	0.215096
0.000244	0.215025
0.000246	0.214963
0.000247	0.214876
0.000248	0.214735
0.000249	0.214593
0.00025	0.214468
0.000251	0.214365
0.000252	0.214295
0.000253	0.214216
0.000254	0.214161
0.000255	0.214106
0.000256	0.21402
0.000257	0.213933
0.000258	0.213792
0.000259	0.213635
0.00026	0.213485
0.000261	0.213383
0.000262	0.21332
0.000263	0.213234
0.000264	0.213171
0.000265	0.213085
0.000266	0.212998
0.000267	0.212935
0.000268	0.212857
0.000269	0.212778
0.00027	0.212723
0.000271	0.212645
0.000272	0.21255
0.000273	0.212448
0.000274	0.21237
0.000275	0.212338
0.000276	0.212307
0.000277	0.212267
0.000278	0.212197
0.000279	0.212095
0.00028	0.212032
0.000281	0.211969
0.000282	0.211851
0.000283	0.211733
0.000284	0.211639
0.000285	0.211529
0.000286	0.211442
0.000287	0.211403
0.000288	0.211317
0.000289	0.211207
0.00029	0.211144
0.000291	0.211065
0.000292	0.210955
0.000293	0.210884
0.000294	0.210829
0.000295	0.210735
0.000296	0.210641
0.000297	0.210586
0.000298	0.210547
0.000299	0.210468
0.0003	0.210358
0.000301	0.210272
0.000302	0.210201
0.000303	0.210114
0.000304	0.210028
0.000305	0.209965
0.000306	0.209902
0.000307	0.209832
0.000308	0.209753
0.000309	0.209698
0.00031	0.209651
0.000311	0.209604
0.000312	0.20958
0.000313	0.209557
0.000314	0.209509
0.000315	0.209462
0.000316	0.209431
0.000317	0.209392
0.000318	0.20936
0.000319	0.209321
0.00032	0.20925
0.000321	0.209187
0.000322	0.209156
0.000323	0.209132
0.000324	0.209093
0.000325	0.209038
0.000326	0.208975
0.000327	0.20892
0.000328	0.208873
0.000329	0.208818
0.00033	0.208739
0.000331	0.208676
0.000332	0.208621
0.000333	0.208551
0.000334	0.208496
0.000335	0.208433
0.000337	0.20837
0.000338	0.208299
0.000339	0.208236
0.00034	0.208189
0.000341	0.208126
0.000342	0.208071
0.000343	0.208016
0.000344	0.207969
0.000345	0.20793
0.000346	0.207883
0.000347	0.207828
0.000348	0.207757
0.000349	0.207702
0.00035	0.207639
0.000351	0.207561
0.000352	0.207482
0.000353	0.207411
0.000354	0.207356
0.000355	0.207301
0.000356	0.207246
0.000357	0.207207
0.000358	0.207191
0.000359	0.207152
0.00036	0.207113
0.000361	0.207081
0.000362	0.206987
0.000363	0.206893
0.000364	0.206838
0.000365	0.206775
0.000366	0.206696
0.000367	0.206618
0.000368	0.206547
0.000369	0.206484
0.00037	0.206429
0.000371	0.206374
0.000372	0.206319
0.000373	0.20628
0.000374	0.206256
0.000375	0.206217
0.000376	0.206154
0.000377	0.206083
0.000378	0.206021
0.000379	0.205973
0.00038	0.205911
0.000381	0.205856
0.000382	0.205832
0.000383	0.205801
0.000384	0.205722
0.000385	0.205636
0.000386	0.205596
0.000388	0.205541
0.000389	0.205463
0.00039	0.205416
0.000391	0.205368
0.000392	0.205321
0.000393	0.205306
0.000394	0.20529
0.000395	0.205243
0.000396	0.20518
0.000397	0.205133
0.000398	0.205093
0.000399	0.205054
0.0004	0.204968
0.000401	0.204881
0.000403	0.204842
0.000404	0.204787
0.000405	0.204708
0.000406	0.204645
0.000407	0.204598
0.000408	0.204559
0.000409	0.204528
0.00041	0.204504
0.000411	0.204449
0.000412	0.204386
0.000413	0.204339
0.000414	0.2043
0.000415	0.204253
0.000416	0.204182
0.000417	0.204119
0.000418	0.204072
0.000419	0.204025
0.00042	0.203978
0.000421	0.203938
0.000422	0.203907
0.000423	0.203868
0.000424	0.203828
0.000425	0.203797
0.000427	0.203765
0.000428	0.203742
0.000429	0.203718
0.00043	0.203679
0.000432	0.203616
0.000433	0.203577
0.000434	0.203553
0.000435	0.203522
0.000436	0.203498
0.000437	0.203483
0.000438	0.203459
0.000439	0.203435
0.00044	0.20338
0.000441	0.203302
0.000442	0.203239
0.000443	0.203168
0.000444	0.203113
0.000445	0.203082
0.000446	0.203027
0.000447	0.202964
0.000448	0.202917
0.000449	0.202877
0.00045	0.202838
0.000451	0.202807
0.000452	0.202791
0.000453	0.202767
0.000455	0.202736
0.000456	0.202705
0.000457	0.202657
0.000458	0.20261
0.000459	0.202587
0.00046	0.202571
0.000461	0.202547
0.000462	0.202524
0.000463	0.2025
0.000464	0.202461
0.000465	0.202422
0.000466	0.20239
0.000467	0.202343
0.000468	0.202296
0.000469	0.202272
0.00047	0.202249
0.000471	0.202225
0.000472	0.202202
0.000473	0.20217
0.000474	0.2021
0.000475	0.202037
0.000476	0.202005
0.000477	0.20195
0.000478	0.201895
0.000479	0.201864
0.00048	0.201848
0.000481	0.201832
0.000482	0.201801
0.000484	0.201762
0.000485	0.201738
0.000486	0.201715
0.000488	0.201683
0.000489	0.201652
0.00049	0.201612
0.000491	0.201565
0.000492	0.201487
0.000493	0.201408
0.000494	0.201345
0.000495	0.201298
0.000496	0.201282
0.000497	0.201259
0.000498	0.20122
0.000499	0.20118
0.0005	0.201141
0.000500999	0.201094
0.000501999	0.201039
0.000502999	0.200999
0.000503999	0.200984
0.000504999	0.200937
0.000505999	0.200889
0.000506999	0.200866
0.000508999	0.200827
0.000509999	0.200795
0.000510999	0.200764
0.000511999	0.200717
0.000512999	0.200685
0.000513999	0.200669
0.000514999	0.200638
0.000515999	0.200583
0.000516999	0.200544
0.000517999	0.200528
0.000518999	0.200512
0.000521999	0.200481
0.000522999	0.200442
0.000523999	0.200418
0.000524999	0.200394
0.000525999	0.200355
0.000526999	0.200308
0.000527999	0.200269
0.000528999	0.200222
0.000529999	0.200174
0.000530999	0.200151
0.000531999	0.200096
0.000532999	0.200033
0.000534999	0.199978
0.000536999	0.199923
0.000537999	0.199892
0.000538999	0.199868
0.000539999	0.199852
0.000540999	0.199837
0.000541999	0.199821
0.000542999	0.199805
0.000543999	0.199789
0.000545999	0.199774
0.000546999	0.199758
0.000548999	0.199734
0.000549999	0.199687
0.000550999	0.199648
0.000551999	0.199617
0.000552999	0.199562
0.000553999	0.199522
0.000554999	0.199491
0.000555999	0.199444
0.000556999	0.199389
0.000557999	0.199334
0.000558999	0.199287
0.000559999	0.199247
0.000561999	0.199224
0.000563999	0.199169
0.000566999	0.199106
0.000567999	0.199082
0.000568999	0.199059
0.000569999	0.199027
0.000570999	0.198996
0.000571999	0.198964
0.000572999	0.198925
0.000573999	0.198894
0.000574999	0.198862
0.000575999	0.198823
0.000576999	0.198784
0.000577999	0.198744
0.000578999	0.198721
0.000579999	0.198674
0.000580999	0.198611
0.000581999	0.198564
0.000583999	0.198532
0.000584999	0.198516
0.000585999	0.198501
0.000586999	0.198485
0.000587999	0.198461
0.000588999	0.19843
0.000589999	0.198399
0.000590999	0.198375
0.000591999	0.198359
0.000592999	0.198344
0.000593999	0.198328
0.000594999	0.198289
0.000595999	0.198241
0.000596999	0.198218
0.000597999	0.198202
0.000599999	0.198179
0.000600999	0.198139
0.000601999	0.198108
0.000602999	0.198061
0.000603999	0.198006
0.000604999	0.197982
0.000605999	0.197959
0.000606999	0.197935
0.000607999	0.197911
0.000608999	0.197888
0.000609999	0.197856
0.000610999	0.197817
0.000611999	0.197786
0.000612999	0.197754
0.000613999	0.197731
0.000614999	0.197699
0.000615999	0.197668
0.000617999	0.197621
0.000618999	0.197566
0.000619999	0.197542
0.000621999	0.197511
0.000624999	0.197479
0.000625999	0.197432
0.000627999	0.197377
0.000628999	0.197346
0.000629999	0.197314
0.000630999	0.197291
0.000631999	0.197275
0.000634999	0.197259
0.000637999	0.197244
0.000639999	0.197196
0.000640999	0.197126
0.000641999	0.197071
0.000642999	0.197031
0.000643999	0.197008
0.000644999	0.196984
0.000645999	0.196945
0.000646999	0.196914
0.000647999	0.19689
0.000648999	0.196866
0.000649999	0.196843
0.000650999	0.196811
0.000651999	0.196772
0.000652999	0.196717
0.000653999	0.196678
0.000655999	0.196646
0.000656999	0.196607
0.000658999	0.196583
0.000659999	0.196568
0.000660999	0.196544
0.000661999	0.196521
0.000662999	0.196505
0.000663999	0.196489
0.000664999	0.196466
0.000665999	0.196434
0.000666999	0.196403
0.000668999	0.196356
0.000671999	0.196301
0.000672999	0.196261
0.000673999	0.196238
0.000674999	0.196214
0.000675999	0.196191
0.000679999	0.196167
0.000680999	0.196143
0.000682999	0.19612
0.000684999	0.196096
0.000686999	0.196073
0.000689999	0.196049
0.000690999	0.196026
0.000691999	0.195986
0.000692999	0.195947
0.000693999	0.195923
0.000694999	0.1959
0.000695999	0.195853
0.000696999	0.195813
0.000697999	0.195774
0.000698999	0.195696
0.000699999	0.195641
0.000701999	0.195625
0.000703999	0.195609
0.000704999	0.195578
0.000705999	0.195546
0.000706999	0.195531
0.000707999	0.195515
0.000709999	0.195499
0.000710999	0.195483
0.000711999	0.195468
0.000712999	0.195452
0.000713999	0.195436
0.000715999	0.195413
0.000716999	0.195373
0.000717999	0.195334
0.000718999	0.195311
0.000719999	0.195287
0.000720999	0.195256
0.000722999	0.195224
0.000723999	0.195193
0.000725999	0.195153
0.000728999	0.195122
0.000729999	0.195098
0.000730999	0.195075
0.000731999	0.195059
0.000733999	0.195043
0.000735999	0.19502
0.000736999	0.194988
0.000737999	0.194965
0.000738999	0.194941
0.000739999	0.194918
0.000746999	0.194902
0.000748999	0.194886
0.000749999	0.194839
0.000751999	0.194784
0.000753999	0.194753
0.000754999	0.194721
0.000755999	0.194674
0.000756999	0.194635
0.000757999	0.194611
0.000759999	0.194588
0.000760999	0.194564
0.000761999	0.19454
0.000762999	0.194517
0.000764999	0.194485
0.000765999	0.194462
0.000766999	0.194438
0.000767999	0.194399
0.000769999	0.194352
0.000770999	0.19432
0.000771999	0.194297
0.000773999	0.194273
0.000774999	0.19425
0.000775999	0.194226
0.000776999	0.19421
0.000777999	0.194179
0.000778999	0.19414
0.000779999	0.194093
0.000780999	0.194053
0.000782999	0.19403
0.000783999	0.193998
0.000785999	0.193967
0.000787999	0.193943
0.000788999	0.193928
0.000791999	0.193912
0.000792999	0.193888
0.000793999	0.193841
0.000794999	0.193802
0.000795999	0.193755
0.000797999	0.193708
0.000798999	0.19366
0.000799999	0.193598
0.000800999	0.193558
0.000801999	0.193527
0.000803999	0.193503
0.000807999	0.193472
0.000811999	0.19344
0.000812999	0.193425
0.000813999	0.193409
0.000815999	0.193393
0.000816999	0.19337
0.000818999	0.19333
0.000819999	0.193299
0.000820999	0.193283
0.000821999	0.193268
0.000823999	0.193252
0.000824999	0.193228
0.000825999	0.193205
0.000826999	0.193181
0.000827999	0.193142
0.000828999	0.19311
0.000829999	0.193087
0.000830999	0.193063
0.000831999	0.19304
0.000832999	0.193
0.000833999	0.192969
0.000834999	0.192945
0.000835999	0.192914
0.000836999	0.19289
0.000838999	0.192875
0.000839999	0.192859
0.000840999	0.192843
0.000843999	0.192828
0.000844999	0.192812
0.000845999	0.192773
0.000846999	0.192725
0.000847999	0.192702
0.000848999	0.192686
0.000849999	0.19267
0.000850999	0.192639
0.000851999	0.1926
0.000852999	0.192576
0.000853999	0.192552
0.000854999	0.192529
0.000855999	0.192513
0.000856999	0.192497
0.000857999	0.192474
0.000860999	0.19245
0.000863999	0.192427
0.000864999	0.192403
0.000866999	0.192372
0.000868999	0.192332
0.000869999	0.192309
0.000870999	0.192293
0.000871999	0.192277
0.000872999	0.192262
0.000873999	0.192238
0.000874999	0.192215
0.000875999	0.192199
0.000876999	0.192167
0.000877999	0.192136
0.000879999	0.192112
0.000880999	0.192089
0.000881999	0.192065
0.000882999	0.192042
0.000883999	0.19201
0.000884999	0.191979
0.000885999	0.191963
0.000886999	0.19194
0.000888999	0.191908
0.000889999	0.191885
0.000891999	0.191869
0.000892999	0.191853
0.000893999	0.191837
0.000894999	0.191822
0.000895999	0.191806
0.000896999	0.19179
0.000897999	0.191775
0.000898999	0.191759
0.000899999	0.191735
0.000902999	0.191704
0.000903999	0.19168
0.000905999	0.191665
0.000906999	0.191641
0.000908999	0.191617
0.000910999	0.191586
0.000911999	0.191539
0.000912999	0.1915
0.000913999	0.19146
0.000914999	0.191429
0.000915999	0.191405
0.000920999	0.191374
0.000922999	0.191342
0.000923999	0.191319
0.000924999	0.191287
0.000926999	0.191256
0.000927999	0.191232
0.000930999	0.191209
0.000932999	0.191193
0.000933999	0.191177
0.000934999	0.191154
0.000935999	0.191122
0.000937999	0.191091
0.000938999	0.191052
0.000939999	0.190989
0.000940999	0.190942
0.000941999	0.190918
0.000942999	0.190887
0.000944999	0.190863
0.000945999	0.190847
0.000946999	0.190824
0.000947999	0.1908
0.000948999	0.190785
0.000955999	0.190753
0.000957999	0.190722
0.000958999	0.190706
0.000959999	0.19069
0.000961999	0.190675
0.000962999	0.190651
0.000963999	0.190627
0.000964999	0.190612
0.000965999	0.190588
0.000966999	0.190557
0.000968999	0.190533
0.000971999	0.190478
0.000972999	0.190423
0.000973999	0.190399
0.000974999	0.190376
0.000978999	0.19036
0.000979999	0.190344
0.000980999	0.190329
0.000981999	0.190313
0.000982999	0.190282
0.000983999	0.190234
0.000987999	0.190203
0.000988999	0.190187
0.000989999	0.190172
0.000991999	0.190156
0.000992999	0.19014
0.000993999	0.190117
0.000997999	0.190093
0.000999999	0.190069
0.001001	0.190046
0.001003	0.19003
0.001005	0.190014
0.001006	0.189999
0.001007	0.189983
0.001009	0.189959
0.00101	0.189928
0.001011	0.189904
0.001012	0.189889
0.001013	0.189873
0.001014	0.189857
0.001015	0.189834
0.001016	0.189802
0.001017	0.189779
0.001019	0.189755
0.00102	0.189724
0.001021	0.1897
0.001025	0.189677
0.001027	0.189653
0.001028	0.189629
0.00103	0.189606
0.001031	0.189582
0.001032	0.189559
0.001033	0.189535
0.001038	0.189512
0.001039	0.189488
0.00104	0.189441
0.001041	0.189402
0.001042	0.189386
0.001044	0.18937
0.001045	0.189354
0.001047	0.189339
0.00105	0.189323
0.001051	0.189307
0.001054	0.189292
0.001057	0.189268
0.00106	0.189244
0.001061	0.189229
0.001062	0.189205
0.001063	0.189182
0.001065	0.189158
0.001069	0.189119
0.00107	0.189079
0.001071	0.189056
0.001072	0.18904
0.001073	0.189024
0.001076	0.189001
0.001077	0.188977
0.001078	0.188954
0.001079	0.188922
0.00108	0.188899
0.001081	0.188883
0.001084	0.188867
0.001085	0.188852
0.001086	0.188836
0.001087	0.18882
0.001089	0.188804
0.00109	0.188789
0.001092	0.188773
0.001093	0.188757
0.001095	0.188734
0.001096	0.18871
0.001098	0.188694
0.001099	0.188671
0.001101	0.188647
0.001103	0.188632
0.001105	0.188592
0.001106	0.188553
0.001115	0.188529
0.001117	0.188506
0.00112	0.18849
0.001121	0.188474
0.001122	0.188459
0.001124	0.188443
0.001127	0.188419
0.001137	0.188396
0.001138	0.18838
0.001139	0.188364
0.001141	0.188333
0.001143	0.188301
0.001144	0.188286
0.001145	0.188262
0.001147	0.188239
0.001148	0.188223
0.001149	0.188199
0.00115	0.188168
0.001152	0.188136
0.001154	0.188113
0.001157	0.188074
0.001158	0.188026
0.001159	0.188003
0.00116	0.187987
0.001161	0.187964
0.001162	0.187916
0.001163	0.187877
0.001165	0.187861
0.001167	0.187846
0.001168	0.187822
0.001169	0.187799
0.00117	0.187775
0.001171	0.187751
0.001172	0.187736
0.001174	0.18772
0.001175	0.187704
0.001176	0.187689
0.001179	0.187673
0.001181	0.187657
0.001186	0.187641
0.001187	0.187618
0.001188	0.187586
0.001189	0.187563
0.001192	0.187547
0.001193	0.187531
0.001194	0.187508
0.001196	0.187484
0.001198	0.187461
0.0012	0.187437
0.001201	0.187421
0.001202	0.187406
0.001203	0.187374
0.001205	0.187343
0.001206	0.187327
0.001207	0.187304
0.00121	0.18728
0.001212	0.187264
0.001215	0.187249
0.001218	0.187225
0.001219	0.187186
0.00122	0.187154
0.001222	0.187123
0.001223	0.187091
0.001224	0.187076
0.001225	0.187052
0.001226	0.187029
0.001227	0.186997
0.001228	0.186966
0.001232	0.18695
0.001236	0.186934
0.001237	0.186919
0.001238	0.186903
0.001239	0.186887
0.00124	0.186871
0.001241	0.186848
0.001242	0.186824
0.001243	0.186785
0.001244	0.186746
0.001245	0.18673
0.001246	0.186714
0.001247	0.186699
0.001249	0.186683
0.00125	0.186659
0.001252	0.186636
0.001253	0.186612
0.001254	0.186565
0.001258	0.186526
0.001259	0.186502
0.00126	0.186479
0.001262	0.186463
0.001263	0.186447
0.001269	0.186423
0.00127	0.1864
0.001271	0.186376
0.001274	0.186353
0.001276	0.186337
0.001277	0.186321
0.001278	0.186298
0.001279	0.186274
0.00128	0.186258
0.001282	0.186243
0.001283	0.186227
0.001286	0.186203
0.00129	0.186172
0.001291	0.186148
0.001292	0.186133
0.001293	0.186117
0.001294	0.186093
0.001295	0.18607
0.001296	0.186046
0.001298	0.186023
0.001303	0.185999
0.001304	0.185976
0.001305	0.18596
0.001309	0.185944
0.001311	0.185928
0.001313	0.185897
0.001314	0.185866
0.001315	0.18585
0.001316	0.185834
0.001317	0.185818
0.001318	0.185803
0.001319	0.185779
0.001321	0.185756
0.001322	0.18574
0.001325	0.185724
0.001327	0.185701
0.001328	0.185661
0.001329	0.18563
0.00133	0.185606
0.001331	0.185575
0.001332	0.185551
0.001333	0.185536
0.001335	0.185512
0.001336	0.185488
0.001338	0.185465
0.001339	0.185433
0.00134	0.185402
0.001341	0.185371
0.001342	0.185347
0.001343	0.185316
0.001345	0.185284
0.001346	0.185261
0.001347	0.185237
0.00135	0.185213
0.001353	0.185182
0.001354	0.185151
0.001355	0.185119
0.001356	0.185088
0.001358	0.185064
0.001359	0.185048
0.001361	0.185033
0.001362	0.185017
0.001368	0.185001
0.00137	0.184978
0.001374	0.184954
0.001375	0.184931
0.001376	0.184907
0.001378	0.184891
0.001379	0.184868
0.001382	0.184844
0.001383	0.184828
0.001385	0.184813
0.001387	0.184797
0.001388	0.184773
0.001392	0.184734
0.001395	0.184695
0.001396	0.184671
0.001398	0.184656
0.0014	0.18464
0.001401	0.184624
0.001403	0.184601
0.001404	0.184577
0.001405	0.184561
0.001407	0.184546
0.001409	0.18453
0.001416	0.184506
0.001417	0.184483
0.001419	0.184467
0.001424	0.184443
0.001425	0.18442
0.001426	0.184404
0.001427	0.184381
0.00143	0.184349
0.001432	0.184318
0.001437	0.184294
0.001439	0.18427
0.00144	0.184247
0.001441	0.184223
0.001442	0.1842
0.001445	0.184184
0.001446	0.184168
0.001448	0.184137
0.001449	0.184105
0.00145	0.184082
0.001456	0.18405
0.00146	0.184027
0.001462	0.184011
0.001463	0.183995
0.001465	0.18398
0.001466	0.183948
0.001467	0.183917
0.001469	0.183901
0.00147	0.183878
0.001472	0.183854
0.001475	0.183838
0.001477	0.183823
0.001478	0.183807
0.001479	0.183791
0.00148	0.183768
0.001481	0.183744
0.001488	0.183728
0.001489	0.183697
0.00149	0.183665
0.001492	0.183626
0.001494	0.183587
0.001495	0.183563
0.001498	0.18354
0.001504	0.183524
0.001506	0.183508
0.00151	0.183477
0.001511	0.183445
0.001515	0.18343
0.001517	0.183406
0.001519	0.183375
0.001522	0.183343
0.001523	0.18332
0.001525	0.183296
0.001529	0.183265
0.001532	0.183241
0.001534	0.183225
0.001536	0.183202
0.001538	0.183178
0.00154	0.183163
0.001541	0.183147
0.001545	0.183123
0.001547	0.1831
0.001551	0.183076
0.001552	0.183053
0.001553	0.183021
0.001556	0.18299
0.001557	0.182974
0.00156	0.182935
0.001561	0.182895
0.001562	0.182872
0.001563	0.182848
0.001565	0.182825
0.001569	0.182793
0.00157	0.182762
0.001571	0.182738
0.001573	0.182723
0.001575	0.182707
0.001576	0.182691
0.001578	0.18266
0.00158	0.182628
0.001581	0.182613
0.001583	0.182589
0.001584	0.182558
0.001587	0.182526
0.001588	0.182503
0.001589	0.182487
0.001592	0.182471
0.001593	0.182455
0.001599	0.18244
0.0016	0.182424
0.001602	0.1824
0.001603	0.182377
0.001605	0.182353
0.00161	0.18233
0.001613	0.182314
0.001614	0.18229
0.001617	0.182267
0.001623	0.182251
0.001624	0.182235
0.001625	0.182212
0.001629	0.18218
0.00163	0.182157
0.001632	0.182141
0.001639	0.182125
0.00164	0.18211
0.001641	0.182078
0.001642	0.182047
0.001643	0.182031
0.001646	0.182015
0.001647	0.182
0.001648	0.181984
0.001651	0.181945
0.001652	0.181897
0.001654	0.181874
0.001656	0.181858
0.001657	0.181842
0.001659	0.181827
0.001662	0.181811
0.001664	0.181787
0.001665	0.181764
0.001666	0.181748
0.001667	0.181732
0.001669	0.181717
0.00167	0.181693
0.001671	0.181654
0.001672	0.181622
0.001673	0.181607
0.001677	0.181575
0.00168	0.181536
0.001681	0.181512
0.001683	0.181497
0.001685	0.181481
0.001686	0.181465
0.001688	0.18145
0.00169	0.181426
0.001692	0.181402
0.001693	0.181387
0.001694	0.181371
0.001697	0.181355
0.001698	0.18134
0.001702	0.181324
0.001703	0.181308
0.001704	0.181292
0.001706	0.181277
0.001707	0.181253
0.001711	0.18123
0.001712	0.181214
0.001713	0.181198
0.001716	0.181167
0.001717	0.181127
0.00172	0.181096
0.001721	0.181065
0.001723	0.181041
0.001726	0.181017
0.001727	0.180994
0.001728	0.180978
0.001729	0.180962
0.001734	0.180947
0.001736	0.180931
0.001738	0.180915
0.001739	0.180892
0.00174	0.180868
0.001744	0.180852
0.00175	0.180837
0.001752	0.180821
0.001754	0.180797
0.001755	0.180774
0.001761	0.18075
0.001763	0.180727
0.001764	0.180711
0.001766	0.180695
0.00177	0.180672
0.001772	0.180632
0.001773	0.180601
0.001774	0.180585
0.001775	0.180562
0.001776	0.18053
0.00178	0.180491
0.001782	0.18046
0.001783	0.180436
0.001787	0.180405
0.001788	0.180381
0.001789	0.180365
0.001792	0.18035
0.001793	0.180334
0.001796	0.180318
0.001801	0.180302
0.001802	0.180287
0.001803	0.180255
0.001804	0.180224
0.001808	0.180208
0.001811	0.180192
0.001812	0.180169
0.001815	0.180145
0.001819	0.180122
0.001822	0.180098
0.001823	0.180082
0.001824	0.180067
0.001827	0.180051
0.001829	0.180035
0.00183	0.180012
0.001832	0.179988
0.001834	0.179972
0.001835	0.179957
0.001836	0.179941
0.001837	0.179925
0.001838	0.179909
0.001839	0.179878
0.001843	0.179847
0.001844	0.179831
0.001845	0.179815
0.001847	0.179792
0.001848	0.17976
0.00185	0.179729
0.001852	0.179705
0.001856	0.179682
0.001857	0.179658
0.001859	0.179642
0.00186	0.179627
0.001863	0.179611
0.001865	0.179595
0.001866	0.179579
0.001867	0.179564
0.001868	0.179548
0.00187	0.179532
0.001871	0.179517
0.001874	0.179501
0.001875	0.179485
0.001876	0.179469
0.00188	0.179454
0.001881	0.17943
0.001883	0.179407
0.001884	0.179391
0.001885	0.179375
0.001886	0.179336
0.00189	0.179297
0.001892	0.179273
0.001893	0.179249
0.001895	0.179234
0.001896	0.179218
0.001897	0.179202
0.001901	0.179187
0.001903	0.179171
0.001906	0.179147
0.001911	0.179124
0.001915	0.179108
0.001916	0.179092
0.001918	0.179061
0.001921	0.179029
0.001923	0.179014
0.001924	0.178998
0.001927	0.178982
0.001939	0.178967
0.001941	0.178935
0.001943	0.178904
0.001944	0.178888
0.001945	0.178864
0.001946	0.178841
0.001947	0.178825
0.001948	0.178809
0.001949	0.178786
0.001952	0.178762
0.001955	0.178747
0.001957	0.178731
0.001958	0.178699
0.001961	0.17866
0.001962	0.178629
0.001963	0.178605
0.001969	0.178589
0.001973	0.178574
0.001974	0.178558
0.001976	0.178542
0.00198	0.178527
0.001982	0.178503
0.001984	0.178479
0.001988	0.178456
0.001989	0.178432
0.00199	0.178417
0.001992	0.178393
0.001993	0.178369
0.001994	0.178354
0.001995	0.178338
0.001996	0.178322
0.001997	0.178299
0.002	0.178267
0.002002	0.178236
0.002004	0.178212
0.00201	0.178197
0.002011	0.178181
0.002012	0.178165
0.002013	0.178142
0.002014	0.178118
0.002016	0.178102
0.002017	0.178086
0.002018	0.178071
0.002019	0.178055
0.002022	0.178039
0.002023	0.178024
0.002024	0.178008
0.002027	0.177976
0.002033	0.177945
0.002036	0.177929
0.002037	0.177914
0.002038	0.177898
0.002039	0.177882
0.00204	0.177859
0.002042	0.177835
0.002046	0.177819
0.002047	0.177804
0.002048	0.177788
0.002051	0.177749
0.002052	0.177709
0.002055	0.177694
0.002057	0.17767
0.002058	0.177639
0.002062	0.177615
0.002063	0.177591
0.002065	0.17756
0.002066	0.177536
0.002067	0.177513
0.002068	0.177489
0.002069	0.177474
0.002072	0.17745
0.002074	0.177426
0.002075	0.177411
0.002077	0.177395
0.002078	0.177379
0.002079	0.177364
0.002081	0.177348
0.002083	0.177332
0.002084	0.177316
0.002086	0.177293
0.002087	0.177269
0.002088	0.177246
0.002089	0.177222
0.002092	0.177199
0.002093	0.177167
0.002094	0.177144
0.002095	0.177128
0.002097	0.177104
0.002098	0.177081
0.0021	0.177049
0.002101	0.177018
0.002104	0.177002
0.00211	0.176986
0.002111	0.176971
0.002112	0.176947
0.002122	0.176924
0.002125	0.176908
0.002129	0.176884
0.002133	0.176861
0.002136	0.176845
0.002139	0.176829
0.002141	0.176814
0.002142	0.176782
0.002143	0.176743
0.002145	0.176719
0.002147	0.176704
0.00215	0.176688
0.002154	0.176656
0.002155	0.176625
0.002157	0.176609
0.002159	0.176594
0.002165	0.176578
0.002166	0.176562
0.002167	0.176531
0.002169	0.176491
0.002173	0.176468
0.002177	0.176452
0.002181	0.176421
0.002183	0.176374
0.002185	0.176342
0.002186	0.176326
0.00219	0.176311
0.002191	0.176295
0.002193	0.176279
0.002194	0.176264
0.002196	0.176248
0.0022	0.176232
0.002207	0.176209
0.002212	0.176185
0.002217	0.176161
0.00222	0.176138
0.002222	0.176122
0.002226	0.176099
0.002231	0.176075
0.002232	0.176059
0.002233	0.176028
0.002234	0.175996
0.002237	0.175981
0.002242	0.175957
0.002243	0.175933
0.002244	0.175918
0.002245	0.175902
0.002246	0.175886
0.002249	0.175871
0.002251	0.175855
0.002252	0.175831
0.002253	0.1758
0.002255	0.175776
0.002257	0.175761
0.002258	0.175745
0.002259	0.175729
0.002262	0.175706
0.002264	0.175674
0.002267	0.175651
0.00227	0.175635
0.002272	0.175619
0.002273	0.175603
0.002275	0.17558
0.002276	0.175556
0.002277	0.175541
0.002279	0.175525
0.00228	0.175509
0.002284	0.175493
0.002285	0.175478
0.002286	0.175462
0.00229	0.175446
0.002292	0.175423
0.002294	0.175399
0.002295	0.175383
0.002299	0.175368
0.002307	0.175344
0.002309	0.175305
0.002311	0.175273
0.002313	0.175258
0.002314	0.175242
0.002316	0.175226
0.002318	0.175203
0.002324	0.175179
0.002325	0.175163
0.002327	0.175148
0.002328	0.175116
0.002331	0.175077
0.002332	0.175053
0.002333	0.175038
0.002335	0.175022
0.002336	0.175006
0.002337	0.174983
0.002341	0.174959
0.002342	0.174943
0.002343	0.17492
0.002345	0.174896
0.002346	0.174873
0.002347	0.174849
0.002351	0.174818
0.002352	0.174786
0.002353	0.174771
0.002354	0.174755
0.002355	0.174731
0.002357	0.174708
0.00236	0.174684
0.002363	0.174661
0.002364	0.174645
0.002365	0.174629
0.002367	0.174613
0.00237	0.174598
0.002372	0.174582
0.002374	0.174566
0.002375	0.174551
0.00238	0.174535
0.002381	0.174511
0.002382	0.174488
0.002384	0.174464
0.002385	0.174441
0.002386	0.174425
0.002387	0.174393
0.00239	0.174362
0.002393	0.174346
0.002396	0.174315
0.002397	0.174276
0.002399	0.174252
0.0024	0.174236
0.002402	0.174221
0.002404	0.174205
0.002405	0.174189
0.002407	0.174173
0.002408	0.174158
0.002409	0.174134
0.00241	0.174103
0.002412	0.174079
0.002413	0.174063
0.002422	0.174048
0.002423	0.174024
0.002424	0.174001
0.002429	0.173977
0.00243	0.173953
0.002436	0.173938
0.002437	0.173922
0.002439	0.173898
0.002441	0.173875
0.002448	0.173859
0.002449	0.173843
0.002452	0.173828
0.002454	0.173812
0.002457	0.173796
0.002458	0.173773
0.00246	0.173749
0.002466	0.173733
0.002467	0.173718
0.002472	0.173702
0.002477	0.173686
0.002478	0.17367
0.002479	0.173647
0.00248	0.173623
0.002482	0.1736
0.002487	0.173553
0.002489	0.173513
0.00249	0.173498
0.002491	0.173482
0.002493	0.173466
0.002495	0.17345
0.002498	0.173435
0.002499	0.173411
0.0025	0.173388
0.002506	0.173372
0.002507	0.173356
0.002513	0.173325
0.002514	0.173293
0.002517	0.173278
0.00252	0.173254
0.002521	0.173223
0.002524	0.173199
0.002526	0.173175
0.002527	0.173144
0.002529	0.173113
0.00253	0.173081
0.002531	0.17305
0.002532	0.173026
0.002535	0.17301
0.002538	0.172995
0.002539	0.172979
0.00254	0.172963
0.002541	0.17294
0.002543	0.172916
0.002544	0.1729
0.002545	0.172877
0.002546	0.172853
0.002549	0.172838
0.00255	0.172814
0.002551	0.17279
0.002553	0.172775
0.002554	0.172759
0.002555	0.172735
0.002557	0.172712
0.002559	0.172688
0.002562	0.172665
0.002563	0.172649
0.002575	0.172625
0.002579	0.172594
0.002582	0.172563
0.002585	0.172531
0.002586	0.172508
0.002588	0.172492
0.002589	0.172476
0.002595	0.17246
0.002597	0.172445
0.002603	0.172429
0.002605	0.172413
0.002607	0.172398
0.002609	0.172382
0.00261	0.172366
0.002613	0.17235
0.002616	0.172335
0.002623	0.172319
0.002626	0.172303
0.002628	0.172288
0.00263	0.172272
0.002631	0.172256
0.002633	0.17224
0.002638	0.172225
0.002639	0.172209
0.002641	0.172193
0.002642	0.172178
0.002643	0.172162
0.002644	0.172146
0.002647	0.17213
0.002648	0.172115
0.002649	0.172091
0.00265	0.17206
0.002652	0.172036
0.002653	0.17202
0.002654	0.172005
0.002661	0.171989
0.002664	0.171973
0.002668	0.17195
0.002669	0.171926
0.002671	0.17191
0.002673	0.171895
0.002676	0.171871
0.00268	0.171847
0.002681	0.171824
0.002685	0.1718
0.002686	0.171769
0.002687	0.17173
0.00269	0.171706
0.002692	0.171682
0.002693	0.171659
0.002695	0.171643
0.002696	0.17162
0.002697	0.171596
0.002699	0.171572
0.002701	0.171549
0.002703	0.171525
0.002708	0.171502
0.00271	0.171478
0.002711	0.171455
0.002712	0.171439
0.002713	0.171415
0.002718	0.171384
0.002719	0.17136
0.002724	0.171345
0.002725	0.171329
0.002726	0.171305
0.002729	0.171282
0.002731	0.171266
0.002732	0.17125
0.002734	0.171235
0.002736	0.171219
0.002737	0.171203
0.002738	0.171187
0.00274	0.171172
0.002741	0.171156
0.002748	0.17114
0.00275	0.171125
0.002751	0.171109
0.002752	0.171093
0.002755	0.17107
0.002756	0.17103
0.002766	0.170991
0.002768	0.170967
0.002778	0.170952
0.002783	0.170928
0.002786	0.170905
0.002788	0.170889
0.002792	0.170865
0.002795	0.170842
0.002796	0.170802
0.002801	0.170763
0.002803	0.170747
0.002804	0.170732
0.002808	0.170716
0.002817	0.1707
0.002822	0.170685
0.002823	0.170669
0.002824	0.170653
0.002826	0.170637
0.002827	0.170622
0.00283	0.170606
0.002837	0.17059
0.00284	0.170575
0.002845	0.170559
0.002846	0.170543
0.002853	0.170527
0.002854	0.170512
0.002856	0.170496
0.002857	0.170472
0.002859	0.170449
0.002862	0.170433
0.002863	0.170417
0.002867	0.170402
0.002868	0.170378
0.002869	0.170339
0.00287	0.1703
0.002872	0.170276
0.002874	0.17026
0.002875	0.170245
0.002881	0.170221
0.002887	0.17019
0.00289	0.170166
0.002892	0.170142
0.002895	0.170119
0.002898	0.170103
0.0029	0.170087
0.002904	0.170072
0.002905	0.170056
0.002908	0.17004
0.00291	0.170025
0.002912	0.170009
0.002913	0.169993
0.002918	0.169977
0.002923	0.169962
0.002929	0.169938
0.002934	0.169915
0.002936	0.169899
0.002938	0.169883
0.002939	0.169867
0.002942	0.169852
0.002944	0.169836
0.00295	0.16982
0.002954	0.169797
0.002959	0.169757
0.002961	0.169726
0.002965	0.16971
0.002966	0.169694
0.002967	0.169679
0.002968	0.169663
0.00297	0.169647
0.002975	0.169632
0.002976	0.169616
0.002983	0.1696
0.002986	0.169577
0.002988	0.169553
0.002992	0.169537
0.002995	0.169522
0.002996	0.169506
0.002997	0.16949
0.003007	0.169474
0.003013	0.169459
0.003017	0.169443
0.003018	0.169427
0.00302	0.169412
0.003023	0.169396
0.003025	0.16938
0.003029	0.169357
0.003033	0.169333
0.003035	0.169317
0.003038	0.169294
0.003039	0.16927
0.003041	0.169254
0.003042	0.169239
0.003045	0.169223
0.003046	0.169199
0.003048	0.169176
0.003051	0.169144
0.003052	0.169113
0.003053	0.169097
0.003054	0.169074
0.003056	0.16905
0.003057	0.169034
0.003058	0.169019
0.003059	0.169003
0.00306	0.168987
0.003062	0.168964
0.003063	0.16894
0.003064	0.168924
0.003067	0.168909
0.003069	0.168893
0.003077	0.168877
0.00308	0.168862
0.003081	0.168838
0.003082	0.168814
0.003084	0.168799
0.003087	0.168783
0.003089	0.168767
0.00309	0.168744
0.003091	0.16872
0.003092	0.168697
0.003101	0.168673
0.003102	0.168657
0.00311	0.168642
0.003111	0.168618
0.003112	0.168594
0.003113	0.168579
0.003118	0.168563
0.003122	0.168539
0.003123	0.168508
0.003127	0.168484
0.003131	0.168469
0.003134	0.168445
0.003137	0.168422
0.003138	0.168398
0.003139	0.168374
0.003141	0.168359
0.003142	0.168335
0.003143	0.168312
0.003146	0.168288
0.003151	0.168257
0.003153	0.168233
0.003154	0.168217
0.003159	0.168202
0.003161	0.168186
0.003162	0.16817
0.003166	0.168154
0.003167	0.168139
0.003171	0.168123
0.003172	0.168107
0.003175	0.168092
0.003177	0.168076
0.00318	0.16806
0.003182	0.168044
0.003183	0.168029
0.003192	0.168013
0.003196	0.167997
0.003197	0.167982
0.0032	0.167966
0.003206	0.16795
0.003208	0.167934
0.003211	0.167919
0.003217	0.167903
0.003219	0.167879
0.00323	0.167848
0.003234	0.167824
0.003236	0.167809
0.003237	0.167793
0.003238	0.167777
0.003241	0.167762
0.003244	0.167746
0.003245	0.16773
0.003253	0.167699
0.003259	0.167667
0.00326	0.167651
0.003262	0.167636
0.003268	0.167612
0.003269	0.167589
0.00327	0.167573
0.003279	0.167557
0.00328	0.167541
0.003282	0.167526
0.003283	0.167502
0.003288	0.167471
0.003293	0.167447
0.003298	0.167408
0.0033	0.167361
0.003302	0.167337
0.003304	0.167321
0.003307	0.167306
0.003311	0.16729
0.003313	0.167274
0.003317	0.167259
0.003325	0.167243
0.003329	0.167227
0.003333	0.167211
0.003342	0.167196
0.003343	0.16718
0.003345	0.167164
0.003348	0.167141
0.003349	0.167117
0.003351	0.167101
0.003359	0.167078
0.003361	0.167054
0.003365	0.167039
0.003366	0.167015
0.003367	0.166991
0.003368	0.166976
0.003369	0.16696
0.00337	0.166936
0.003377	0.166905
0.003378	0.166874
0.003379	0.166842
0.003381	0.166819
0.003384	0.166803
0.003385	0.166787
0.003388	0.166771
0.003389	0.166756
0.003394	0.16674
0.0034	0.166724
0.003405	0.166701
0.003409	0.166677
0.003411	0.166661
0.003414	0.166646
0.003417	0.16663
0.003418	0.166606
0.003419	0.166575
0.00342	0.166551
0.003422	0.166536
0.003428	0.16652
0.003429	0.166496
0.003434	0.166473
0.003436	0.166457
0.003441	0.166441
0.003442	0.166418
0.003443	0.166394
0.003445	0.166379
0.003447	0.166363
0.003451	0.166347
0.003457	0.166324
0.00346	0.1663
0.003462	0.166276
0.003464	0.166245
0.003465	0.166221
0.00347	0.166198
0.003473	0.166174
0.003477	0.166159
0.003485	0.166143
0.003489	0.166127
0.003497	0.166104
0.003499	0.166072
0.0035	0.166041
0.003504	0.166009
0.003506	0.165986
0.003509	0.16597
0.003512	0.165954
0.003515	0.165939
0.003518	0.165923
0.003522	0.165907
0.003523	0.165891
0.003524	0.165876
0.003527	0.16586
0.003539	0.165836
[truncated: 9,915 more rows]
