# Supplementary material for: Environmental heterogeneity can tip the population genetics of range expansions
Source: eLife journal article supplement (doi:10.7554/elife.44359), 2019-04-12
Supplement: supp [file v(rho).xlsx]

## Sheet: L=40
1	1.26458
0.9	1.14209
0.8	0.992344
0.73	0.862503
0.72	0.844199
0.71	0.804365
0.7	0.785439
0.69	0.737753
0.68	0.68688
0.67	0.496115
0.66	0.302247
0.65	0.144069
0.64	0.025399
0.63	0
0.62	0
0.61	0
0.6	0
0.5	0

## Sheet: L=75
1	1.27114
0.9	1.14703
0.8	1.01149
0.7	0.823463
0.69	0.794316
0.68	0.77269
0.67	0.750568
0.66	0.713413
0.65	0.687897
0.64	0.581935
0.63	0.238495
0.62	0
0.61	0
0.6	0
0.5	0

## Sheet: L=100
1	1.2764
0.9	1.15646
0.8	1.00711
0.7	0.823658
0.69	0.801602
0.68	0.77575
0.67	0.753943
0.66	0.719599
0.65	0.693954
0.64	0.513575
0.63	0.43776
0.62	0.230315
0.61	0.0482121
0.6	0
0.5	0

## Sheet: L=150
1	1.27586
0.9	1.15727
0.8	1.0179
0.7	0.83297
0.62	0.525051
0.61	0.264376
0.605	0.0966975
0.6	0.0474775
0.595	0
0.59	0
0.585	0
0.58	0
0.5	0

## Sheet: L=300
1	1.27612
0.9	1.15873
0.8	1.01752
0.7	0.832544
0.62	0.58006
0.61	0.468957
0.605	0.376845
0.6	0.165424
0.595	0
0.59	0
0.585	0
0.58	0
0.5	0

## Sheet: L=400
1	1.27763
0.9	1.15965
0.8	1.01784
0.7	0.833814
0.62	0.591425
0.61	0.529484
0.605	0.460081
0.6	0.305506
0.595	0.0357327
0.59	0
0.585	0
0.58	0
0.5	0
