# Supplementary material for: Environmental heterogeneity can tip the population genetics of range expansions
Source: eLife journal article supplement (doi:10.7554/elife.44359), 2019-04-12
Supplement: supp [file w(l).xlsx]

## Sheet: rho=0
7	0.572485
11	0.87938
16	1.29041
25	2.05827
37	3.08424
56	4.72807
85	7.30137
128	11.5005
192	18.0234
288	27.2012

## Sheet: rho=0.1
7	0.680814
11	1.03937
16	1.51877
25	2.36588
37	3.49015
56	5.31835
85	8.07549
128	11.9203
192	17.2147
288	26.9394

## Sheet: rho=0.15
7	0.847042
11	1.29927
16	1.86234
25	2.87065
37	4.23037
56	6.45761
85	9.72721
128	14.5236
192	21.3724
288	31.3912

## Sheet: rho=0.2
7	0.955234
11	1.5073
16	2.19565
25	3.45596
37	5.14931
56	7.85199
85	11.8853
128	17.2799
192	24.5891
288	37.4671

## Sheet: rho=0.25
7	1.38884
11	2.12006
16	3.11733
25	4.85521
37	6.86179
56	9.9343
85	14.1994
128	20.2154
192	29.9274
288	45.6222

## Sheet: rho=0.3
7	1.73594
11	2.98434
16	4.57236
25	7.1676
37	10.2158
56	14.8128
85	21.1497
128	30.7443
192	45.5163
288	66.6207

## Sheet: rho=0.325
7	2.08755
11	3.6732
16	5.94224
25	9.76456
37	14.144
56	20.7302
85	30.4528
128	44.3998
192	62.212
288	88.3694

## Sheet: rho=0.35
7	2.36095
11	4.88377
16	8.42549
25	16.097
37	25.5103
56	40.5207
85	54.3252
128	73.8452
192	101.167
288	141.247

## Sheet: rho=0.365
7	2.75659
11	5.63919
16	10.5265
25	22.6992
37	36.7348
56	56.9454
85	85.093
128	110.782
192	158.728
288	243.595

## Sheet: rho=0.38
7	2.72048
11	5.76585
16	11.1611
25	25.7894
37	49.559
56	91.102
85	157.884
128	238.097
192	345.512
288	491.295

[truncated: 3 more sheets: rho=0.39, rho=0.4, rho=0.41]
