# Supplementary material for: Environmental heterogeneity can tip the population genetics of range expansions
Source: eLife journal article supplement (doi:10.7554/elife.44359), 2019-04-12
Supplement: supp [file w(t).xlsx]

## Sheet: rho=0
1.00084	0.801146
1.30085	0.869176
1.6909	0.941275
2.1979	1.01838
2.85695	1.10291
3.71384	1.19359
4.8277	1.30961
6.27564	1.41957
8.15815	1.53698
10.6053	1.66787
13.7867	1.82006
17.9225	1.96014
23.2988	2.14155
30.2883	2.33285
39.3746	2.52948
51.1867	2.72022
66.5424	2.98369
86.5049	3.24447
112.456	3.48783
146.193	3.8331
190.05	4.13478
247.065	4.41268
321.185	4.7041
417.54	5.01476
542.802	5.37948
705.642	5.83871
917.334	6.4245
1192.53	6.74799
1550.29	7.17764
2015.38	7.58528
2620	7.84069
3406	8.35735
4427.79	8.22149
5756.13	8.2195
7482.97	7.64822
7791.29	7.34931

## Sheet: rho=0.1
1.00108	0.846175
1.30112	0.915962
1.69119	0.996426
2.19805	1.08746
2.85714	1.18959
3.71398	1.29581
4.8279	1.41175
6.27579	1.53549
8.15831	1.67754
10.6055	1.84198
13.7868	1.98571
17.9227	2.14715
23.2992	2.33447
30.2885	2.52046
39.3748	2.71384
51.1869	2.93556
66.5426	3.2139
86.5051	3.50936
112.456	3.86424
146.193	4.20241
190.051	4.48978
247.065	4.86991
321.185	5.17672
417.54	5.64151
542.802	5.95329
705.642	6.3782
917.334	6.96552
1192.53	7.32483
1550.29	7.72857
2015.38	8.08013
2620	7.93334
3406	8.36425
4427.79	8.62997
5756.13	8.66464
7482.97	8.83748
8574.26	9.47814

## Sheet: rho=0.15
1.00132	0.868544
1.30132	0.941906
1.69128	1.02664
2.19818	1.13012
2.85726	1.24691
3.71415	1.37704
4.8282	1.51153
6.27602	1.67255
8.15859	1.83228
10.6057	1.99491
13.787	2.18069
17.9227	2.33997
23.2993	2.56791
30.2886	2.77665
39.3748	3.02551
51.187	3.20935
66.5427	3.46121
86.5052	3.7979
112.457	4.05526
146.193	4.34897
190.051	4.74585
247.066	5.0472
321.185	5.60404
417.54	5.94242
542.802	6.46977
705.642	6.84093
917.334	7.44453
1192.53	7.58536
1550.29	8.24569
2015.38	8.88568
2620	9.62161
3406	9.6618
4427.79	9.29504
5756.13	9.18015
7482.97	9.64828
9094.8	8.91964

## Sheet: rho=0.2
1.00159	0.892354
1.30143	0.972581
1.69146	1.06531
2.19833	1.17677
2.85751	1.30386
3.71432	1.43999
4.82832	1.60115
6.27628	1.78081
8.15865	1.97194
10.6058	2.20491
13.787	2.40484
17.9227	2.58757
23.2993	2.86709
30.2889	3.08288
39.375	3.35414
51.1871	3.60083
66.5429	3.81219
86.5054	4.12142
112.457	4.49806
146.193	4.79154
190.051	5.23869
247.066	5.63707
321.185	6.1443
417.54	6.79408
542.802	7.10275
705.642	7.69684
917.335	8.26488
1192.53	8.81481
1550.29	9.14472
2015.38	9.28675
2620	9.88133
3406	9.95842
4427.79	9.72546
5756.13	10.3476
7482.97	10.4182
9726.36	10.5887
9754.16	10.3274

## Sheet: rho=0.25
1.00177	0.909582
1.30182	0.988233
1.69179	1.08236
2.19885	1.19865
2.8579	1.33297
3.71477	1.49534
4.82855	1.69293
6.27653	1.91078
8.15886	2.16426
10.606	2.43464
13.7877	2.73583
17.9231	3.04346
23.2995	3.35763
30.2889	3.60078
39.3752	3.86946
51.1873	4.12051
66.5431	4.41371
86.5056	4.76448
112.457	5.11435
146.194	5.49394
190.051	5.96697
247.066	6.30136
321.185	6.59259
417.541	7.0316
542.802	7.53351
705.642	8.11365
917.335	8.61743
1192.53	9.21301
1550.29	10.0637
2015.38	10.2475
2620	10.551
3406	10.8043
4427.79	10.958
5756.13	10.7479
7482.97	10.1916
9727.86	10.95
10623.9	10.871

## Sheet: rho=0.3
1.00195	0.933229
1.30194	1.0149
1.69193	1.11674
2.19912	1.24375
2.85831	1.38891
3.71497	1.57208
4.8288	1.79625
6.27683	2.05636
8.15922	2.3637
10.6065	2.71935
13.7879	3.13699
17.9234	3.55206
23.3	3.93659
30.2893	4.42515
39.3755	4.83365
51.1877	5.23947
66.5434	5.57259
86.5059	5.92557
112.457	6.26816
146.194	6.61243
190.051	7.23412
247.066	7.80895
321.185	8.19963
417.541	8.63452
542.802	9.41878
705.643	9.99762
917.335	10.3966
1192.53	11.2356
1550.29	11.7135
2015.38	12.4541
2620	13.0374
3406	13.609
4427.79	12.8028
5756.13	13.4491
7482.97	13.4105
9727.86	13.3843
11859.1	13.1091

## Sheet: rho=0.325
1.00218	0.936015
1.3023	1.01582
1.69214	1.11721
2.19909	1.24063
2.85847	1.39368
3.71533	1.57944
4.8291	1.81185
6.27724	2.09818
8.1596	2.43701
10.6068	2.85606
13.7881	3.32985
17.9238	3.8874
23.3001	4.51609
30.2896	5.07736
39.3757	5.64824
51.1878	6.27848
66.5436	6.64606
86.5062	7.24599
112.457	7.7138
146.194	8.27853
190.051	8.87251
247.066	9.40329
321.186	10.1127
417.541	10.5703
542.803	11.3091
705.643	11.5984
917.335	12.4958
1192.54	13.0119
1550.29	13.5148
2015.38	13.8239
2620	14.0885
3406	13.9174
4427.79	14.7773
5756.13	14.9609
7482.97	15.4025
9727.86	14.7767
12646.1	15.2055
12745.9	14.9417

## Sheet: rho=0.35
1.00258	0.948477
1.30241	1.03059
1.69251	1.13203
2.19962	1.25155
2.85848	1.40805
3.7156	1.59511
4.82953	1.82768
6.2777	2.11807
8.15999	2.48863
10.6072	2.91058
13.7885	3.4584
17.9241	4.11075
23.3009	4.89719
30.2904	5.7392
39.3762	6.78232
51.1882	7.88842
66.5441	8.73789
86.5064	9.70382
112.458	10.5842
146.194	10.8453
190.052	11.1883
247.067	12.3236
321.186	12.7605
417.541	13.7545
542.803	14.5812
705.643	15.0495
917.336	16.1968
1192.54	16.7412
1550.3	16.9454
2015.38	17.0945
2620	18.0196
3406	18.4697
4427.79	18.8173
5756.13	18.457
7482.97	18.9193
9727.86	18.0763
12646.2	18.2539
13973.5	18.3631

## Sheet: rho=0.365
1.00261	0.961546
1.30272	1.04281
1.69284	1.14529
2.19987	1.26576
2.85909	1.4181
3.71565	1.60252
4.82987	1.83902
6.27763	2.12882
8.16051	2.48967
10.6076	2.93863
13.789	3.50384
17.925	4.19048
23.301	5.03453
30.2907	6.09116
39.3767	7.3088
51.1888	8.57973
66.5445	9.90291
86.5071	11.3541
112.458	12.8554
146.195	14.5163
190.052	15.7565
247.067	15.4649
321.187	16.3944
417.542	17.1355
542.803	18.8121
705.644	19.2051
917.336	20.1267
1192.54	21.2507
1550.3	21.5998
2015.38	23.0091
2620	23.0656
3406	23.9808
4427.8	23.3265
5756.13	24.0162
7482.97	23.3711
9727.86	22.3468
12646.2	23.3616
14988.2	24.3475

## Sheet: rho=0.38
1.00297	0.953977
1.30289	1.03805
1.69326	1.13979
2.19983	1.25766
2.85905	1.41664
3.71606	1.60545
4.83009	1.83484
6.27812	2.12763
8.16073	2.48994
10.6082	2.94202
13.7891	3.50022
17.925	4.19645
23.3023	5.04229
30.291	6.16902
39.3773	7.50043
51.1897	9.13699
66.5451	11.0095
86.5076	13.2981
112.459	15.9318
146.195	18.9716
190.053	21.6727
247.068	25.0526
321.187	24.7734
417.542	27.6863
542.804	27.4875
705.644	28.9951
917.336	30.1525
1192.54	32.3317
1550.3	31.5413
2015.38	33.8125
2620	31.2285
3406	32.5309
4427.8	33.1092
5756.13	32.2353
7482.97	34.1968
9727.86	33.9901
12646.2	34.1378
16429.5	35.9101
16586.9	37.0847

[truncated: 2 more sheets: rho=0.39, rho=0.4]
