# Supplementary material for: Environmental heterogeneity can tip the population genetics of range expansions
Source: eLife journal article supplement (doi:10.7554/elife.44359), 2019-04-12
Supplement: supp [file Wsat.xlsx]

## Sheet: Sheet1
rho=0			rho=0.4
L	Wsat^2		L	Wsat^2
50	2.66409		50	14.3306
100	3.70585		100	22.1831
150	4.60338		150	33.2873
200	5.22358		200	49.8729
300	6.43354		300	52.1112
400	7.46258		400	72.3119
500	7.99031		500	84.5134
750	9.55331		750	117.539
