# Supplementary figures and images for: Environmental heterogeneity can tip the population genetics of range expansions
Source: eLife journal article supplement (doi:10.7554/elife.44359), 2019-04-12

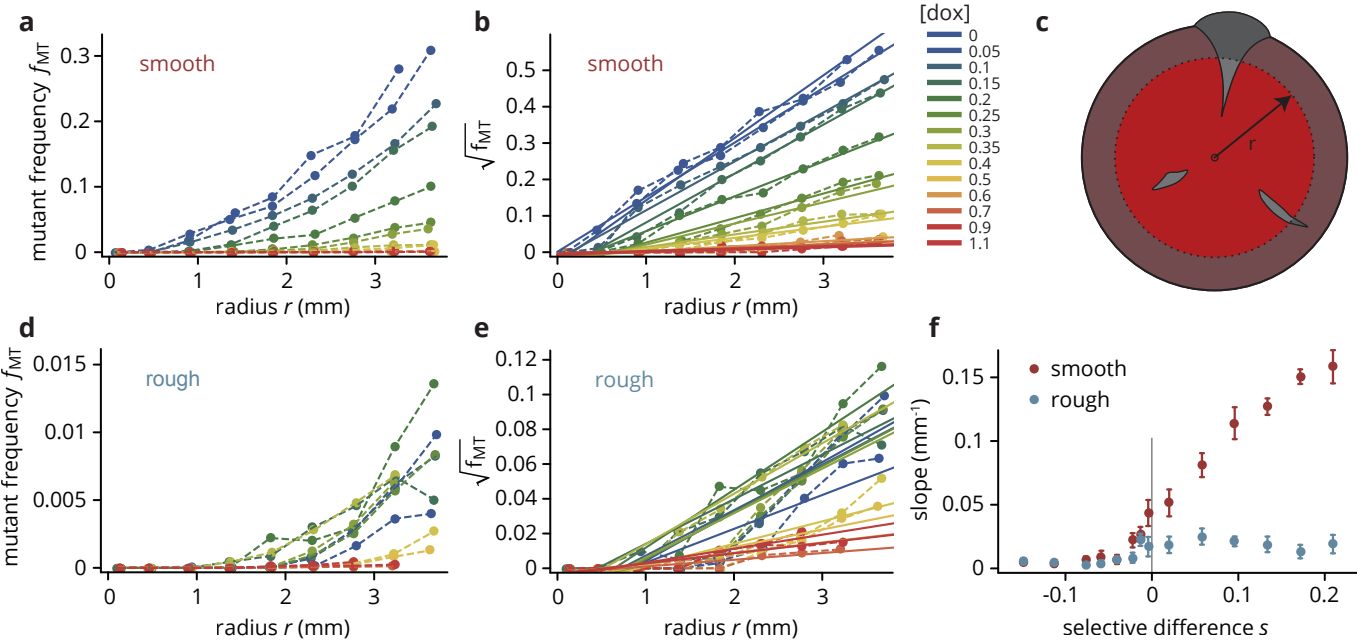

Supplement: supp [file elife-44359-supp-v1.zip]

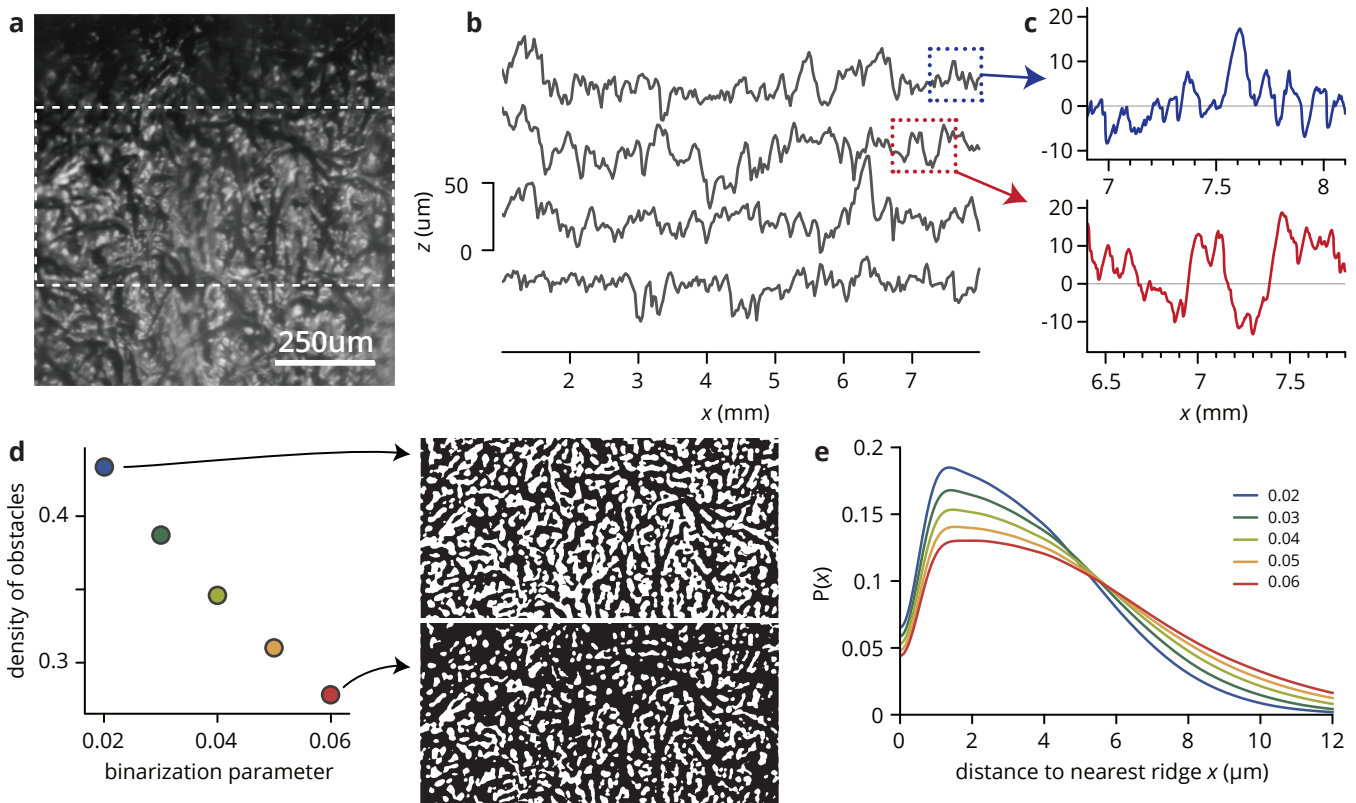

Supplement: supp [file elife-44359-supp-v1.zip]

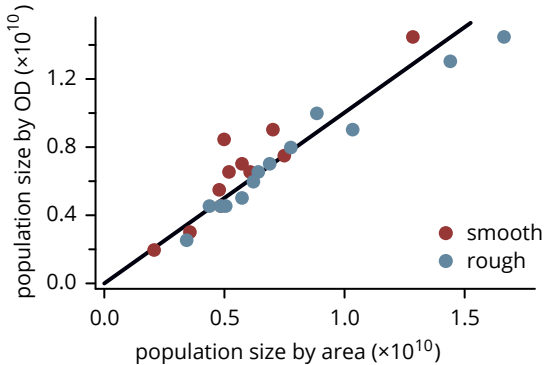

Supplement: supp [file elife-44359-supp-v1.zip]

**a**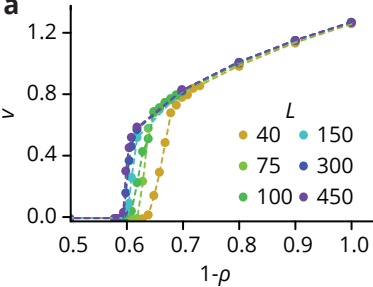**b**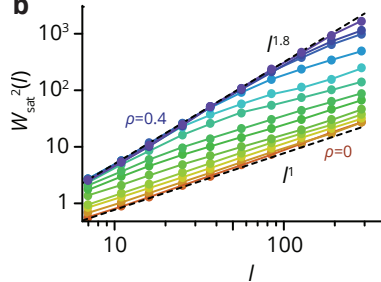**c**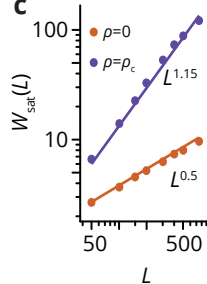**d**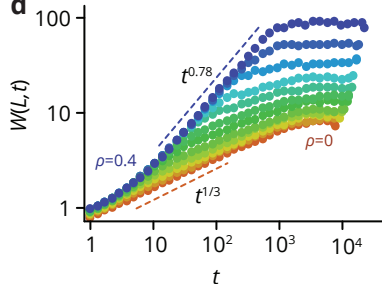

Supplement: supp [file elife-44359-supp-v1.zip]

likelihood

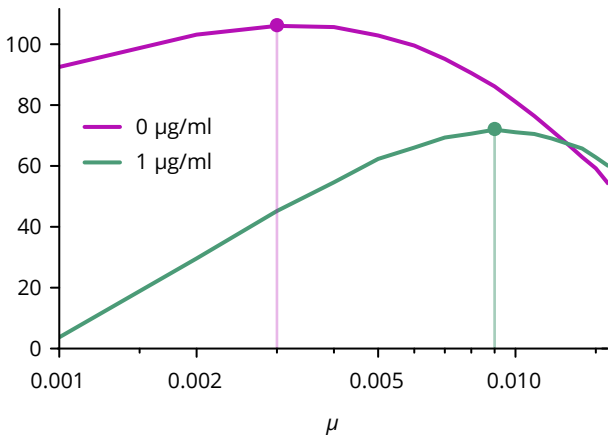

Supplement: supp [file elife-44359-supp-v1.zip]

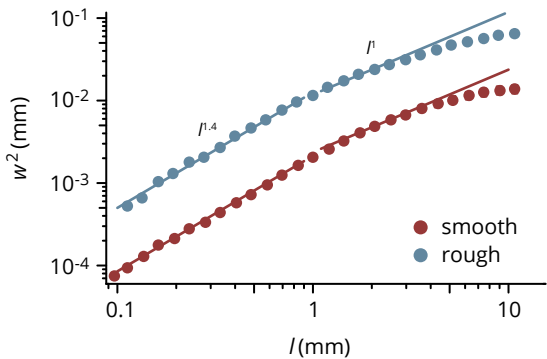

Supplement: supp [file elife-44359-supp-v1.zip]

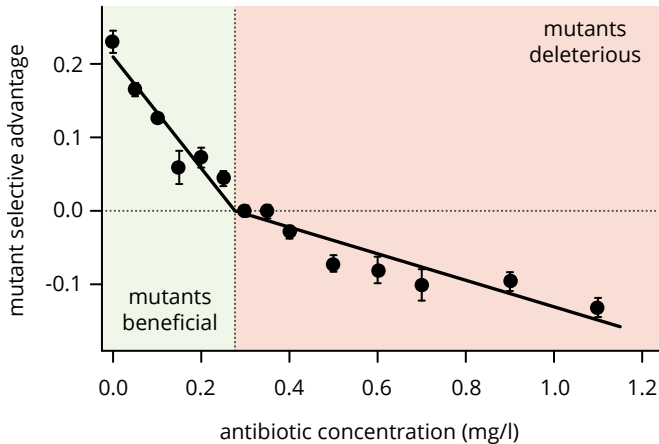

Supplement: supp [file elife-44359-supp-v1.zip]

**a**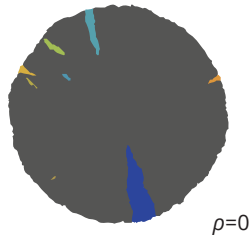**b**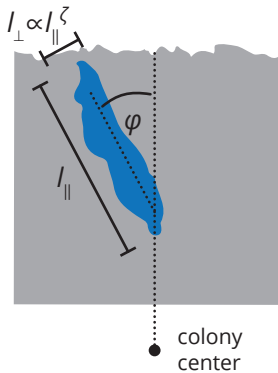**c**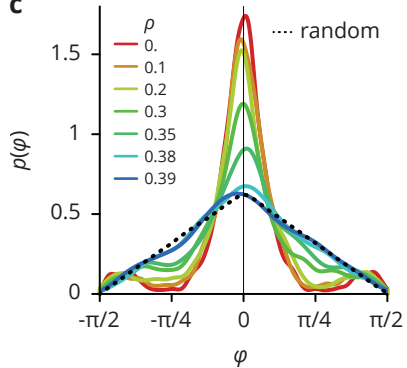**d**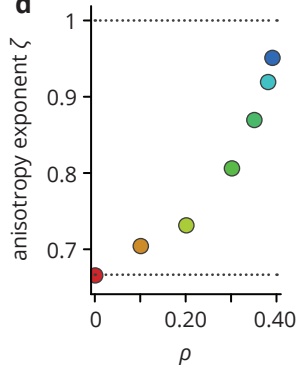

Supplement: supp [file elife-44359-supp-v1.zip]

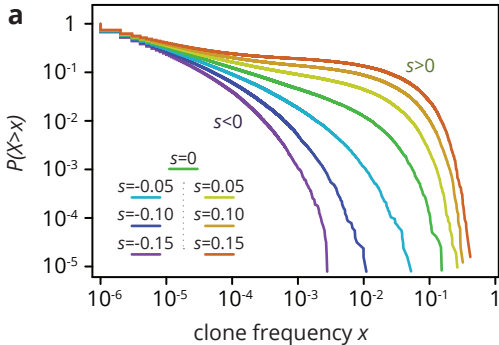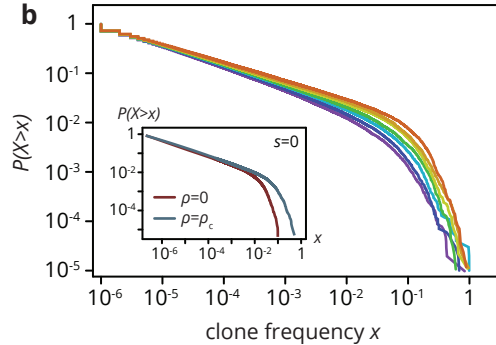

Supplement: supp [file elife-44359-supp-v1.zip]

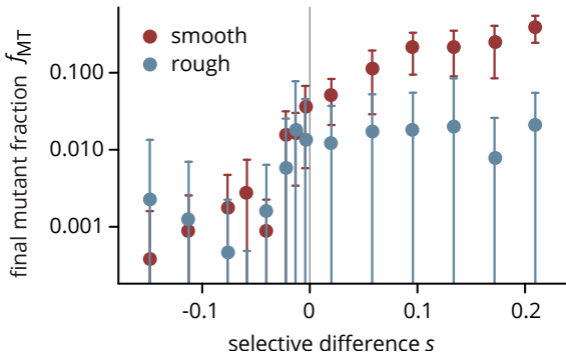

Supplement: supp [file elife-44359-supp-v1.zip]

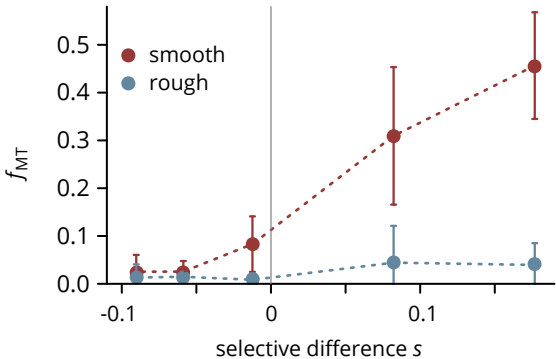

Supplement: supp [file elife-44359-supp-v1.zip]
